# Supplementary material for: Genomic landscapes of ovarian clear cell carcinoma from latin countries reveal aberrations linked to survival and progression
Source: BMC Cancer. 2023 Jul 3;23:613. doi: 10.1186/s12885-023-11095-8 (PMC10316635; doi:10.1186/s12885-023-11095-8)
Supplement: Supplementary file 2 — Supplementary Material 1 [file 12885_2023_11095_MOESM1_ESM.xlsx]

## Sheet: all_cases
PatientID	Country	Institution	OncoScan	age_at_diagnosis	OS	status	PFS	Recurrence	Stage_at_diagnosis	Stage_group	MSI	PI3KCA_mutation	ARID1A	HNF1B	WT1	ER	PR	TP53	PTEN	MLH1	MSH2	MSH6	PMS2	Platinum_sensitivity	Endometriosis	TEEs	Bone_metastasis	Asiatic_ancestry
Occ23	Spain	IVO	yes	48	11.8333	alive	11.8333	no	I/II	initial	MSS	wt	+++	+	negative	negative	negative	normal	+	+		+	+	sensitive	no	no	no	no
Occ1	Spain	IVO	yes	44	210.6	alive	16.7333	yes	I/II	initial	MSS	p.H1047X	negative	+++	negative	negative	negative	normal	+++	++	+++	+++	+++	sensitive	no	no	no	no
Occ2	Spain	IVO	yes	38	198.033	alive	198.033	no	I/II	initial	MSS	p.H1047X	negative	+++	negative	negative	negative	normal	+++	+++	++	+++	+++	sensitive	yes	no	no	no
Occ3	Spain	IVO	no	49	113.767	alive	113.767	no	I/II	initial	MSS	wt	negative	+++	negative	negative	negative	normal	+++	++	+++	+++	+++	sensitive	yes	no	no	no
Occ65	Spain	IVO	no	44	96.3667	alive	96.3667	no	I/II	initial	MSI-L	wt	+++	+	negative	negative	negative	negative	+++	++	++	++	++	sensitive	no	no	no	no
Occ66	Spain	IVO	no	45	60.5667	dead	41.2667	yes	I/II	initial	MSS	p.H1047X			negative	negative	negative	normal		++		++	+++	sensitive	no	yes	no	no
Occ14	Spain	IVO	yes	55	81.2667	dead	49.8667	yes	I/II	initial	MSS	wt			negative	negative	negative	normal	++	+	+	+++	+++	sensitive	no	yes	no	no
Occ10	Spain	IVO	yes	31	62.1333	alive	62.1333	no	I/II	initial	MSS	p.H1047X	+++	+++	negative	negative	negative	normal	+++	++	+++	+++	++	sensitive	yes	no	no	no
Occ17	Spain	IVO	yes	64	62.7333	alive	12.6333	yes	I/II	initial	MSS	wt			negative	negative	negative	normal		+++		++		sensitive	no	no	no	no
Occ18	Spain	IVO	yes	48	39.1333	alive	39.1333	no	I/II	initial	MSS	p.E542K	negative	+++	negative	negative	negative	normal	+++	+++	+++	+++	+++	sensitive	yes	no	no	no
Occ22	Brazil	HCRP	yes	36	43.0333	alive	43.0333	no	I/II	initial	MSS	wt	+++	+++	negative	negative	negative	normal	negative	++		++	++	sensitive	no	no	no	no
Occ21	Brazil	HCRP	yes	75	123.733	alive	123.733	no	I/II	initial	MSS	p.H1047X	negative	+++	negative	negative	negative	normal	+++	+++	+++	+++	+++	sensitive	no	no	no	no
Occ24	Brazil	HCRP	yes	35	75.0667	alive	75.0667	no	I/II	initial	MSS	wt	+++	+++	negative	negative	negative	normal	+		++	++	+	sensitive	yes	no	no	no
Occ67	Costa Rica	HM	no	43	24.4667	alive	24.4667	no	IA	initial	MSS	wt	+++	+++	negative	negative	negative	aberrant	++	+++	+++	+++	+++	sensitive	no	yes	no	no
Occ68	Costa Rica	HM	no	65	21.4333	alive	21.4333	no	IIB	initial	MSS	p.H1047X	+	+++	negative	negative	negative	normal	negative	++	+++	+++	++	sensitive	no	no	no	no
Occ69	Costa Rica	HM	no	48	15.6	alive	15.6	no	IA	initial	MSS	wt	+	+	negative	negative	negative	negative	negative			+		sensitive	no	no	no	no
Occ61	Costa Rica	HM	no	54	13.7667	alive	13.7667	no	IC	initial	MSS	wt	+++	+	negative	negative	negative	negative	+				+	sensitive	no	no	no	no
Occ70	Costa Rica	HM	no	37	5.86667	alive	5.86667	no	IA	initial	MSS	p.E542K	+++		+++	negative	negative	normal	+++	++	++	++	++		yes	no	no	no
Occ71	Brazil	ACCCC	no	60	49.5667	alive	49.5667	no	IC	initial	MSS	p.H1047X	negative	++	negative	negative	negative	normal	++	+	+	+	+	sensitive	no	no	no	yes
Occ72	Brazil	ACCCC	no	60	52.2333	alive	52.2333	no	IC	initial	MSS	wt	negative	+++	negative	negative	negative	normal	+++	++	++	+	++	sensitive	no	yes	no	no
Occ73	Brazil	ACCCC	no	35	47.7333	alive	47.7333	no	IA	initial	MSS	wt	+++	+++	negative	negative	negative		++	++	+	+	++	sensitive	yes	no	no	yes
Occ74	Brazil	ACCCC	no	43	6.53333	dead	4.46667	yes	IB	initial	MSI-L	wt	+++	++	negative	negative	negative	negative	+++	+	++	++	++	resistant	no	no	no	no
Occ9	Spain	IVO	yes	51	27.2333	dead	13.1333	yes	I/II	initial	MSS	p.C420R	negative	+++	negative	negative	negative	normal	+++	++	+++	+++	+++	sensitive	yes	yes	yes	no
Occ11	Spain	IVO	yes	58	34.1	dead	9.76667	yes	III	advanced	MSS	wt	negative	+++	negative	negative	negative	normal	++	++	+++	+++	+++	resistant	no	no	no	no
Occ7	Spain	IVO	yes	50	87.2667	dead	23.1	yes	III	advanced	MSS	wt	+++	++	negative	negative	negative	normal	+++	+	+++	+++	+++	sensitive	no	no	yes	no
Occ8	Spain	IVO	yes	63	16.9333	dead	4.4	yes	III	advanced	MSS	wt	++		negative	negative	negative	normal	+	+	+	+	++	resistant	no	no	no	no
Occ15	Spain	IVO	yes	63	34.4333	dead	34.4333	yes	III	advanced	MSS	wt	+++		negative	negative	negative	aberrant	+	++	+++	+++	+++		no	no	no	no
Occ75	Spain	IVO	no	53	7.23333	alive	6.3	yes	III	advanced	MSI-L	wt	++	+++	negative	negative	negative	normal	+	+++	+++	+++	+++	resistant	no	no	no	no
Occ76	Costa Rica	HM	no	70	18.8	dead	14.9667	yes	IIIC	advanced	MSS		+	++		negative	negative	normal	+	+	+	++	++	sensitive	no	no	no	no
Occ77	Costa Rica	HM	no	40	10.4333	dead	10.4333	yes	IIIC	advanced	MSS	p.E542K	negative	+++	negative	negative	negative	normal	++	+++	+++	+++	+++	resistant	no	no	no	no
Occ78	Brazil	ACCCC	no	29	8.76667	dead	8.76667	yes	IIIC	advanced	MSS	wt	+	negative	+	negative	negative	normal	++	+	+	+	++	resistant	no	no	no	no
Occ32	Brazil	ACCCC	yes	45	81.1	dead	16.4667	yes	IIIC	advanced	MSS	wt	++	++	negative	negative	negative	normal						sensitive	no	no	no	no
Occ53	Brazil	ACCCC	yes	59	14.4667	dead	8.86667	yes	IIIC	advanced	MSS	wt			negative	negative	negative	normal	++	+	+			resistant	no	yes	no	no
Occ79	Brazil	ACCCC	no	50	20.9667	dead	11.3	yes	IIIC	advanced	MSS	wt	negative	+++	negative	negative	negative	normal	++	+	+++	+++	++	resistant	no	yes	no	no
Occ80	Brazil	ACCCC	no	66	71.1667	dead	8.7	yes	IIIC	advanced	MSS	p.E542K	+++	negative	+	+	negative	normal	++	+	++	+	+	resistant	no	no	no	no
Occ81	Spain	IVO	no	38	1.06667	dead	0.933333	yes	IV	advanced		wt	+	+++	negative	negative	negative	normal	+	++	+++	+++	+++	resistant	yes	no	no	no
Occ16	Spain	IVO	yes	74	19.1333	dead	7.76667	yes	IV	advanced	MSS	wt	negative	+++	negative	negative	negative	normal	+++	+++	+++	+++	+++	resistant	no	no	no	no
Occ82	Costa Rica	HM	no	51	3.13333	dead	3.13333	yes	IV	advanced	MSS	wt	+++	+++	negative	negative	negative	normal	++	+++	+++	+++	+++	resistant	no	no	no	no
Occ36	Brazil	ACCCC	yes	68	3	dead	3	yes	IV	advanced	MSS	wt	+++	negative	negative	negative	negative	negative	negative						no	no	yes	no
Occ83	Spain	IVO	no	36	60.3	alive	60.3	no	I/II	initial	MSI-H	p.H1047X	negative	+++	negative	negative	negative	normal	+++	+++	+++	+++	+++	sensitive	yes	no	no	no
Occ13	Spain	IVO	yes	34	141.667	alive	141.667	no	I/II	initial	MSI-H	wt		++	negative	negative	negative	normal	+	++			+++	sensitive	no	no	no	no
Occ58	Costa Rica	HM	yes	36	40.9667	alive	40.9667	no	IC	initial	MSI-H	wt			negative	negative	negative							sensitive	no	no	no	no
Occ30	Brazil	ACCCC	yes	53	83.2333	alive	83.2333	no	IA	initial	MSI-H	wt	+++	negative	negative	negative	negative	normal	+				+	sensitive	yes	no	no	yes
Occ28	Brazil	ACCCC	yes	36	37.8333	dead	14.6	yes	IC	initial	MSI-H	p.E542K	+++	+++	negative	negative	negative	normal	+++	++	++	++	+++	sensitive	no	no	no	no
Occ12	Spain	IVO	yes	53	153.767	alive	46.2	yes	III	advanced	MSI-H	wt	+++	negative	++	++	negative	aberrant	++	++	+++	+++	+++	sensitive	no	no	no	no
Occ4	Spain	IVO	yes	48	35.4333	dead	10.0333	yes	III	advanced	MSI-H	wt			negative	negative	negative	normal	negative		+	+		resistant	no	no	no	no
Occ29	Brazil	ACCCC	yes	63	24.9667	dead	9.3	yes	IIIC	advanced	MSI-H	wt	+++	+++	negative	negative	negative	negative	++	+	+++	++	+++	resistant	no	yes	no	no
Occ84	Brazil	HCRP	no	59	0.433333	dead	0.433333	yes	I/II	initial			+++	+++	negative	negative	negative	normal	++	+++	+++	++	+++		yes	yes	no	no
Occ85	Brazil	HCRP	no	64	63.0667	alive	63.0667	no	I/II	initial			+++	+++	negative	negative	negative	normal	+	+	+++	+++	+++		no	no	no	no
Occ64	Brazil	HCRP	no	53	18.7667	alive	18.7667	no	IA	initial			negative	+	negative	negative	negative	normal	negative		+	+	++	sensitive	yes	no	no	no
Occ86	Brazil	ACCCC	no	46	25.0667	dead	12.2333	yes	IC	initial		wt	negative	+++	negative	negative	negative	normal		+	+	+	++	resistant	no	no	no	no
Occ87	Brazil	ACCCC	no	34	37.1333	alive	34.4667	yes	IA	initial		wt	+	+++	negative	negative	negative	normal	+	++	+	+	+++	sensitive	yes	no	no	no
Occ88	Brazil	ACCCC	no	57	18.5	dead	12.9667	yes	IIIC	advanced				+	negative	negative	negative	normal					+	resistant	no	yes	no	no
Occ89	Spain	IVO	no	67	75.1	alive	66.1	yes	I/II	initial			+++	+++	negative	negative	negative	normal	+++	+++	+++	+++	+++	sensitive	no	no	no	no
Occ90	Spain	IVO	no	46	68.5	alive	13.7	yes	I/II	initial			+++	+++	negative	negative	negative	normal	+++	+++	+++	+++	+++		no	no	no	no
Occ91	Spain	IVO	no	35	5.83333	dead	2.7	yes	I/II	initial			+	++	negative	negative	negative	normal	++	++	++	++	++	resistant	no	yes	no	no
Occ92	Spain	IVO	no	47	30.5	alive	30.5	no	I/II	initial			+++	+	negative	+++	+++	normal	negative	++	+	+++	++	sensitive	no	no	no	no
Occ93	Spain	IVO	no	52	16.8333	dead	10.5	yes	I/II	initial			+	+++	negative	negative	negative	aberrant	++	+++	++	+++	++	resistant	yes	yes	no	no
Occ94	Brazil	HCRP	no	31	41.6	dead	17.0667	yes	III	advanced			+++	+++	negative	+	negative	normal	+	+++	+++	+++	++	sensitive	yes	no	no	no
Occ27	Brazil	ACCCC	no	63	45.7333	alive	18.2333	yes	IA	initial			+++	+	++	+	negative		+		++	++			no	yes	no	no

## Sheet: primary_tumor_samples
PatientID	sample_type	Country	Institution	OncoScan	age_at_diagnosis	OS	status	PFS	Recurrence	Stage_at_diagnosis	Stage_group	MSI	PI3KCA_mutation	ARID1A	HNF1B	WT1	ER	PR	TP53	PTEN	MLH1	MSH2	MSH6	PMS2	Platinum_sensitivity	Endometriosis	TEEs	Bone_metastasis	Asiatic_ancestry
Occ23	primary	Spain	IVO	yes	48	11.8333	alive	11.8333	no	I/II	initial	MSS	wt	+++	+	negative	negative	negative	normal	+	+		+	+	sensitive	no	no	no	no
Occ1	primary	Spain	IVO	yes	44	210.6	alive	16.7333	yes	I/II	initial	MSS	p.H1047X	negative	+++	negative	negative	negative	normal	+++	++	+++	+++	+++	sensitive	no	no	no	no
Occ2	primary	Spain	IVO	yes	38	198.033	alive	198.033	no	I/II	initial	MSS	p.H1047X	negative	+++	negative	negative	negative	normal	+++	+++	++	+++	+++	sensitive	yes	no	no	no
Occ3	primary	Spain	IVO	no	49	113.767	alive	113.767	no	I/II	initial	MSS	wt	negative	+++	negative	negative	negative	normal	+++	++	+++	+++	+++	sensitive	yes	no	no	no
Occ65	primary	Spain	IVO	no	44	96.3667	alive	96.3667	no	I/II	initial	MSI-L	wt	+++	+	negative	negative	negative	negative	+++	++	++	++	++	sensitive	no	no	no	no
Occ66	primary	Spain	IVO	no	45	60.5667	dead	41.2667	yes	I/II	initial	MSS	p.H1047X			negative	negative	negative	normal		++		++	+++	sensitive	no	yes	no	no
Occ14	primary	Spain	IVO	yes	55	81.2667	dead	49.8667	yes	I/II	initial	MSS	wt			negative	negative	negative	normal	++	+	+	+++	+++	sensitive	no	yes	no	no
Occ10	primary	Spain	IVO	yes	31	62.1333	alive	62.1333	no	I/II	initial	MSS	p.H1047X	+++	+++	negative	negative	negative	normal	+++	++	+++	+++	++	sensitive	yes	no	no	no
Occ17	primary	Spain	IVO	yes	64	62.7333	alive	12.6333	yes	I/II	initial	MSS	wt			negative	negative	negative	normal		+++		++		sensitive	no	no	no	no
Occ18	primary	Spain	IVO	yes	48	39.1333	alive	39.1333	no	I/II	initial	MSS	p.E542K	negative	+++	negative	negative	negative	normal	+++	+++	+++	+++	+++	sensitive	yes	no	no	no
Occ22	primary	Brazil	HCRP	yes	36	43.0333	alive	43.0333	no	I/II	initial	MSS	wt	+++	+++	negative	negative	negative	normal	negative	++		++	++	sensitive	no	no	no	no
Occ21	primary	Brazil	HCRP	yes	75	123.733	alive	123.733	no	I/II	initial	MSS	p.H1047X	negative	+++	negative	negative	negative	normal	+++	+++	+++	+++	+++	sensitive	no	no	no	no
Occ24	primary	Brazil	HCRP	yes	35	75.0667	alive	75.0667	no	I/II	initial	MSS	wt	+++	+++	negative	negative	negative	normal	+		++	++	+	sensitive	yes	no	no	no
Occ67	primary	Costa Rica	HM	no	43	24.4667	alive	24.4667	no	IA	initial	MSS	wt	+++	+++	negative	negative	negative	aberrant	++	+++	+++	+++	+++	sensitive	no	yes	no	no
Occ68	primary	Costa Rica	HM	no	65	21.4333	alive	21.4333	no	IIB	initial	MSS	p.H1047X	+	+++	negative	negative	negative	normal	negative	++	+++	+++	++	sensitive	no	no	no	no
Occ69	primary	Costa Rica	HM	no	48	15.6	alive	15.6	no	IA	initial	MSS	wt	+	+	negative	negative	negative	negative	negative			+		sensitive	no	no	no	no
Occ61	primary	Costa Rica	HM	no	54	13.7667	alive	13.7667	no	IC	initial	MSS	wt	+++	+	negative	negative	negative	negative	+				+	sensitive	no	no	no	no
Occ70	primary	Costa Rica	HM	no	37	5.86667	alive	5.86667	no	IA	initial	MSS	p.E542K	+++		+++	negative	negative	normal	+++	++	++	++	++		yes	no	no	no
Occ71	primary	Brazil	ACCCC	no	60	49.5667	alive	49.5667	no	IC	initial	MSS	p.H1047X	negative	++	negative	negative	negative	normal	++	+	+	+	+	sensitive	no	no	no	yes
Occ72	primary	Brazil	ACCCC	no	60	52.2333	alive	52.2333	no	IC	initial	MSS	wt	negative	+++	negative	negative	negative	normal	+++	++	++	+	++	sensitive	no	yes	no	no
Occ73	primary	Brazil	ACCCC	no	35	47.7333	alive	47.7333	no	IA	initial	MSS	wt	+++	+++	negative	negative	negative		++	++	+	+	++	sensitive	yes	no	no	yes
Occ9	primary	Spain	IVO	yes	51	27.2333	dead	13.1333	yes	I/II	initial	MSS	p.C420R	negative	+++	negative	negative	negative	normal	+++	++	+++	+++	+++	sensitive	yes	yes	yes	no
Occ11	primary	Spain	IVO	yes	58	34.1	dead	9.76667	yes	III	advanced	MSS	wt	negative	+++	negative	negative	negative	normal	++	++	+++	+++	+++	resistant	no	no	no	no
Occ7	primary	Spain	IVO	yes	50	87.2667	dead	23.1	yes	III	advanced	MSS	wt	+++	++	negative	negative	negative	normal	+++	+	+++	+++	+++	sensitive	no	no	yes	no
Occ8	primary	Spain	IVO	yes	63	16.9333	dead	4.4	yes	III	advanced	MSS	wt	++		negative	negative	negative	normal	+	+	+	+	++	resistant	no	no	no	no
Occ15	primary	Spain	IVO	yes	63	34.4333	dead	34.4333	yes	III	advanced	MSS	wt	+++		negative	negative	negative	aberrant	+	++	+++	+++	+++		no	no	no	no
Occ75	primary	Spain	IVO	no	53	7.23333	alive	6.3	yes	III	advanced	MSI-L	wt	++	+++	negative	negative	negative	normal	+	+++	+++	+++	+++	resistant	no	no	no	no
Occ76	primary	Costa Rica	HM	no	70	18.8	dead	14.9667	yes	IIIC	advanced	MSS		+	++		negative	negative	normal	+	+	+	++	++	sensitive	no	no	no	no
Occ77	primary	Costa Rica	HM	no	40	10.4333	dead	10.4333	yes	IIIC	advanced	MSS	p.E542K	negative	+++	negative	negative	negative	normal	++	+++	+++	+++	+++	resistant	no	no	no	no
Occ78	primary	Brazil	ACCCC	no	29	8.76667	dead	8.76667	yes	IIIC	advanced	MSS	wt	+	negative	+	negative	negative	normal	++	+	+	+	++	resistant	no	no	no	no
Occ32	primary	Brazil	ACCCC	yes	45	81.1	dead	16.4667	yes	IIIC	advanced	MSS	wt	++	++	negative	negative	negative	normal						sensitive	no	no	no	no
Occ53	primary	Brazil	ACCCC	yes	59	14.4667	dead	8.86667	yes	IIIC	advanced	MSS	wt			negative	negative	negative	normal	++	+	+			resistant	no	yes	no	no
Occ80	primary	Brazil	ACCCC	no	66	71.1667	dead	8.7	yes	IIIC	advanced	MSS	p.E542K	+++	negative	+	+	negative	normal	++	+	++	+	+	resistant	no	no	no	no
Occ81	primary	Spain	IVO	no	38	1.06667	dead	0.933333	yes	IV	advanced		wt	+	+++	negative	negative	negative	normal	+	++	+++	+++	+++	resistant	yes	no	no	no
Occ16	primary	Spain	IVO	yes	74	19.1333	dead	7.76667	yes	IV	advanced	MSS	wt	negative	+++	negative	negative	negative	normal	+++	+++	+++	+++	+++	resistant	no	no	no	no
Occ82	primary	Costa Rica	HM	no	51	3.13333	dead	3.13333	yes	IV	advanced	MSS	wt	+++	+++	negative	negative	negative	normal	++	+++	+++	+++	+++	resistant	no	no	no	no
Occ36	primary	Brazil	ACCCC	yes	68	3	dead	3	yes	IV	advanced	MSS	wt	+++	negative	negative	negative	negative	negative	negative						no	no	yes	no
Occ83	primary	Spain	IVO	no	36	60.3	alive	60.3	no	I/II	initial	MSI-H	p.H1047X	negative	+++	negative	negative	negative	normal	+++	+++	+++	+++	+++	sensitive	yes	no	no	no
Occ13	primary	Spain	IVO	yes	34	141.667	alive	141.667	no	I/II	initial	MSI-H	wt		++	negative	negative	negative	normal	+	++			+++	sensitive	no	no	no	no
Occ58	primary	Costa Rica	HM	yes	36	40.9667	alive	40.9667	no	IC	initial	MSI-H	wt			negative	negative	negative							sensitive	no	no	no	no
Occ30	primary	Brazil	ACCCC	yes	53	83.2333	alive	83.2333	no	IA	initial	MSI-H	wt	+++	negative	negative	negative	negative	normal	+				+	sensitive	yes	no	no	yes
Occ28	primary	Brazil	ACCCC	yes	36	37.8333	dead	14.6	yes	IC	initial	MSI-H	p.E542K	+++	+++	negative	negative	negative	normal	+++	++	++	++	+++	sensitive	no	no	no	no
Occ12	primary	Spain	IVO	yes	53	153.767	alive	46.2	yes	III	advanced	MSI-H	wt	+++	negative	++	++	negative	aberrant	++	++	+++	+++	+++	sensitive	no	no	no	no
Occ4	primary	Spain	IVO	yes	48	35.4333	dead	10.0333	yes	III	advanced	MSI-H	wt			negative	negative	negative	normal	negative		+	+		resistant	no	no	no	no
Occ29	primary	Brazil	ACCCC	yes	63	24.9667	dead	9.3	yes	IIIC	advanced	MSI-H	wt	+++	+++	negative	negative	negative	negative	++	+	+++	++	+++	resistant	no	yes	no	no
Occ84	primary	Brazil	HCRP	no	59	0.433333	dead	0.433333	yes	I/II	initial			+++	+++	negative	negative	negative	normal	++	+++	+++	++	+++		yes	yes	no	no
Occ85	primary	Brazil	HCRP	no	64	63.0667	alive	63.0667	no	I/II	initial			+++	+++	negative	negative	negative	normal	+	+	+++	+++	+++		no	no	no	no
Occ64	primary	Brazil	HCRP	no	53	18.7667	alive	18.7667	no	IA	initial			negative	+	negative	negative	negative	normal	negative		+	+	++	sensitive	yes	no	no	no
Occ86	primary	Brazil	ACCCC	no	46	25.0667	dead	12.2333	yes	IC	initial		wt	negative	+++	negative	negative	negative	normal		+	+	+	++	resistant	no	no	no	no
Occ87	primary	Brazil	ACCCC	no	34	37.1333	alive	34.4667	yes	IA	initial		wt	+	+++	negative	negative	negative	normal	+	++	+	+	+++	sensitive	yes	no	no	no
Occ88	primary	Brazil	ACCCC	no	57	18.5	dead	12.9667	yes	IIIC	advanced				+	negative	negative	negative	normal					+	resistant	no	yes	no	no
Occ89	primary	Spain	IVO	no	67	75.1	alive	66.1	yes	I/II	initial			+++	+++	negative	negative	negative	normal	+++	+++	+++	+++	+++	sensitive	no	no	no	no
Occ90	primary	Spain	IVO	no	46	68.5	alive	13.7	yes	I/II	initial			+++	+++	negative	negative	negative	normal	+++	+++	+++	+++	+++		no	no	no	no
Occ91	primary	Spain	IVO	no	35	5.83333	dead	2.7	yes	I/II	initial			+	++	negative	negative	negative	normal	++	++	++	++	++	resistant	no	yes	no	no
Occ92	primary	Spain	IVO	no	47	30.5	alive	30.5	no	I/II	initial			+++	+	negative	+++	+++	normal	negative	++	+	+++	++	sensitive	no	no	no	no
Occ93	primary	Spain	IVO	no	52	16.8333	dead	10.5	yes	I/II	initial			+	+++	negative	negative	negative	aberrant	++	+++	++	+++	++	resistant	yes	yes	no	no
Occ27	primary	Brazil	ACCCC	no	63	45.7333	alive	18.2333	yes	IA	initial			+++	+	++	+	negative		+		++	++			no	yes	no	no

## Sheet: recurrence_samples
PatientID	sample_type	Country	Institution	OncoScan	age_at_diagnosis	OS	status	PFS	Recurrence	Stage_at_diagnosis	Stage_group	MSI	PI3KCA_mutation	ARID1A	HNF1B	WT1	ER	PR	TP53	PTEN	MLH1	MSH2	MSH6	PMS2	Platinum_sensitivity	Endometriosis	TEEs	Bone_metastasis	Asiatic_ancestry
Occ74	recurrence	Brazil	ACCCC	no	43	6.53333	dead	4.46667	yes	IB	initial	MSI-L	wt	+++	++	negative	negative	negative	negative	+++	+	++	++	++	resistant	no	no	no	no
Occ53	recurrence	Brazil	ACCCC	yes	59	14.4667	dead	8.86667	yes	IIIC	advanced	MSS	wt	negative	+	negative	negative	negative	negative						resistant	no	yes	no	no
Occ79	recurrence	Brazil	ACCCC	no	50	20.9667	dead	11.3	yes	IIIC	advanced	MSS	wt	negative	+++	negative	negative	negative	normal	++	+	+++	+++	++	resistant	no	yes	no	no
Occ94	recurrence	Brazil	HCRP	no	31	41.6	dead	17.0667	yes	III	advanced			+++	+++	negative	+	negative	normal	+	+++	+++	+++	++	sensitive	yes	no	no	no
