# Supplementary material for: Genomic landscapes of ovarian clear cell carcinoma from latin countries reveal aberrations linked to survival and progression
Source: BMC Cancer. 2023 Jul 3;23:613. doi: 10.1186/s12885-023-11095-8 (PMC10316635; doi:10.1186/s12885-023-11095-8)
Supplement: Supplementary file 4 — Supplementary Material 3 [file 12885_2023_11095_MOESM3_ESM.xlsx]

## Sheet: primary_tumor
OS	SampleID	status	PFS	Recurrence	Stage	Stage_groups	%LOH	%genome_change	Total_CN_alterations	Mutation_OncoScan	Ploidy_Tuscan	Ploidy_ASCAT	Polyploid	%aberrant_cells_Tuscan	%aberrant_cells_ASCAT	HRD-LOH	HRD-TAI	HRD-LST	HRD-sum	Cluster	OS_group	HRD-sum_group	ZNF217	PI3KCB	BRCA2	MYC	ASH1L	MAPK8	MKL1/MCHR1	PTEN	PTEN_LOH
3	Occ36	dead	3	yes	IV	advanced	67.6377	59.2405	113		nd	nd	nd	nd	nd	nd	nd	nd	nd	nd	PS		gain	gain	loss	normal	normal	loss	loss	normal	yes
11.8333	Occ23	alive	11.8333	no	I/II	initial	6.68164	59.3944	140		4	3.37	yes	30	36	2	13	16	31	FSl	PS	high	gain	gain	normal	gain	gain	gain	gain	gain	normal
14.4667	Occ53	dead	8.86667	yes	III	advanced	4.8857	3.98953	121		nd	2.06	no	nd	76	0	0	0	0	Sxl	PS	low	normal	normal	normal	normal	gain	normal	normal	normal	normal
16.9333	Occ8	dead	4.4	yes	III	advanced	19.3237	36.6233	120		2	1.96	no	60	61	6	10	4	20	FSl	PS	high	gain	gain	normal	gain	gain	normal	gain	normal	normal
19.1333	Occ16	dead	7.76667	yes	IV	advanced	14.3183	21.5598	72	EGFR:p.L861Q:c.2582T>A	4	3.81	yes	50	52	2	9	12	23	FSl	PS	high	gain	normal	loss	normal	gain	gain	gain	gain	normal
24.9667	Occ29	dead	9.3	yes	III	advanced	11.6983	15.748	56	TP53:p.R213*:c.637C>T	nd	2.29	no	nd	100	0	2	4	6	Sxl	PS	low	normal	normal	normal	normal	normal	normal	normal	normal	normal
27.2333	Occ9	dead	13.1333	yes	I/II	initial	38.1761	56.3821	145	PIK3CA:p.H1047R:c.3140A>G	2	3.58	yes	60	64	0	19	12	31	FSl	PS	high	gain	gain	loss	loss	gain	gain	gain	gain	normal
34.1	Occ11	dead	9.76667	yes	III	advanced	3.27388	9.06917	92	NRAS:p.G12S/C:c.34G>A/T	2	1.93	no	100	100	1	1	0	2	Sxl	PS	low	gain	normal	normal	normal	gain	normal	normal	normal	normal
34.4333	Occ15	dead	34.4333	yes	III	advanced	57.5086	59.2029	151	TP53:p.R248Q/L:c.743G>A/T	2	3.18	yes	45	29	26	29	30	85	STl	PS	high	normal	gain	loss	normal	gain	normal	loss	loss	yes
35.4333	Occ4	dead	10.0333	yes	III	advanced	3.4717	6.07953	27	PTEN:p.K267fs*9:c.800delA	nd	2.1	no	nd	100	0	1	0	1	Sxl	FC	low	normal	normal	normal	gain	normal	normal	normal	normal	normal
37.8333	Occ28	dead	14.6	yes	I/II	initial	6.02565	12.7061	74	PIK3CA:p.E542K:c.1624G>A	2	1.98	no	65	68	3	7	4	14	FSl	PS		normal	normal	normal	gain	gain	gain	gain	normal	normal
39.1333	Occ18	alive	39.1333	no	I/II	initial	3.10932	2.6884	29	KRAS:p.G13D:c.38G>A	2	1.99	no	75	79	2	0	3	5	Sxl	FC	low	normal	loss	normal	normal	normal	normal	normal	normal	normal
40.9667	Occ58	alive	40.9667	no	I/II	initial	6.17485	0.9496	4		2	2.03	no	100	33	2	2	0	4	Sxl	FC	low	normal	normal	normal	normal	normal	normal	normal	normal	normal
43.0333	Occ22	alive	43.0333	no	I/II	initial	2.24201	0.892354	4	PTEN:p.R130Q/fs*4:c.389G>A/delG	2	2.05	no	100	91	1	0	1	2	Sxl	FC	low	normal	normal	normal	normal	normal	normal	normal	normal	normal
62.1333	Occ10	alive	62.1333	no	I/II	initial	8.33764	16.8075	63		2	1.95	no	65	63	4	4	3	11	FSl	MB		gain	normal	loss	gain	normal	normal	normal	normal	yes
62.7333	Occ17	alive	12.6333	yes	I/II	initial	22.3995	55.4615	172		nd	3.79	yes	nd	43	3	21	12	36	FSl	MB	high	gain	gain	loss	gain	normal	gain	gain	gain	normal
75.0667	Occ24	alive	75.0667	no	I/II	initial	14.5759	25.4853	161		2	1.91	no	65	71	6	11	10	27	FSl	MB	high	gain	gain	loss	gain	gain	normal	normal	normal	normal
81.1	Occ32	dead	16.4667	yes	III	advanced	14.7611	19.7663	70		nd	2.29	no	nd	100	0	2	5	7	Sxl	MB		normal	normal	loss	gain	normal	normal	gain	normal	normal
81.2667	Occ14	dead	49.8667	yes	I/II	initial	1.74841	1.25913	5		2	2.05	no	100	100	0	0	1	1	Sxl	FC	low	normal	normal	normal	normal	normal	normal	normal	normal	normal
83.2333	Occ30	alive	83.2333	no	I/II	initial	39.0073	43.9989	96		nd	3.53	yes	nd	56	5	19	8	32	FSl	MB	high	gain	normal	loss	gain	loss	normal	normal	normal	normal
87.2667	Occ7	dead	23.1	yes	III	advanced	1.03006	9.2941	22		2	2.03	no	100	100	0	0	0	0	Sxl	FC	low	gain	normal	normal	gain	normal	normal	normal	normal	normal
123.733	Occ21	alive	123.733	no	I/II	initial	43.8607	63.9809	88	PIK3CA:p.H1047L:c.3140A>T	nd	3.71	yes	nd	62	0	15	6	21	FSl	MB	high	normal	gain	loss	gain	gain	normal	normal	normal	normal
141.667	Occ13	alive	141.667	no	I/II	initial	3.46292	4.27599	11		2	2.01	no	100	92	2	1	4	7	Sxl	FC		normal	normal	normal	gain	normal	normal	normal	normal	normal
153.767	Occ12	alive	46.2	yes	III	advanced	35.1698	57.8008	147		nd	1.98	no	nd	54	18	24	32	74	STl	MB	high	normal	gain	loss	gain	normal	gain	loss	loss	yes
198.033	Occ2	alive	198.033	no	I/II	initial	13.9682	27.9128	69		nd	2.13	no	nd	100	2	7	4	13	Sxl	MB		normal	gain	loss	gain	normal	normal	normal	normal	normal
210.6	Occ1	alive	16.7333	yes	I/II	initial	41.3744	74.272	252	PIK3CA:p.H1047R:c.3140A>G	nd	3.7	yes	nd	72	3	22	12	37	FSl	MB	high	gain	gain	loss	gain	gain	gain	gain	normal	yes

## Sheet: recurrence
SampleID	OS	status	PFS	Recurrence	Stage	Stage_groups	%LOH	%genome_change	Total_CN_alterations	Mutation_OncoScan	Ploidy_Tuscan	Ploidy_ASCAT	Polyploid	%aberrant_cells_Tuscan	%aberrant_cells_ASCAT	HRD-LOH	HRD-TAI	HRD-LST	HRD-sum	Cluster	OS_group	HRD-sum_group	ZNF217	PI3KCB	BRCA2	MYC	ASH1L	MAPK8	MKL1/MCHR1	PTEN	PTEN_LOH
Occ53	14.4667	dead	8.86667	yes	III	advanced	7.8762	32.7833	153		nd	2.14	no	nd	100								normal	gain	normal	gain	normal	gain	normal	gain	no
