# Supplementary material for: Genomic landscapes of ovarian clear cell carcinoma from latin countries reveal aberrations linked to survival and progression
Source: BMC Cancer. 2023 Jul 3;23:613. doi: 10.1186/s12885-023-11095-8 (PMC10316635; doi:10.1186/s12885-023-11095-8)
Supplement: Supplementary file 7 — Supplementary Material 6 [file 12885_2023_11095_MOESM6_ESM.xlsx]

## Sheet: regions OS groups gain
Order	Chr_Start	Chromosome	Start	End	MB (n=9)	PS (n=10)	Pvalue	Genes		Order	Chr_Start	Chromosome	Start	End	MB (n=9)	FC (n=7)	Pvalue	Genes		Order	Chr_Start	Chromosome	Start	End	PS (n=10)	FC (n=7)	Pvalue	Genes		Order	Chr_Start	Chromosome	Start	End	MB (n=9)	not MB (n=17)	Pvalue	Genes		Order	Chr_Start	Chromosome	Start	End	PS (n=10)	not PS (n=16)	Pvalue	Genes
1	C1_St155337339	1	155337339	155448415	2	8	0.0230141	ASH1L		1	C3_St14195282	3	14195282	14361537	5	0	0.0336538	XPC LSM3		1	C1_St151477194	1	151477194	151547253	5	0	0.0441176	TUFT1 CGN		1	C1_St8063529	1	8063529	8352039	3	0	0.0323077	ERRFI1		1	C1_St151653313	1	151653313	152251914	6	2	0.0256261	SNX27 RORC CELF3 RIIAD1 MRPL9 OAZ3 TDRKH LINGO4 C2CD4D THEM5 THEM4 S100A10 S100A11 LOC100131107 TCHHL1 TCHH RPTN HRNR
2	C8_St52269610	8	52269610	53338897	8	2.98748	0.0195877	PXDNL ST18 PCMTD1		2	C3_St93708684	3	93708684	104300275	5.81184	0	0.0155577	ABI3BP ARL6 DCBLD2 CMSS1 FILIP1L ARL13B EPHA6 CRYBG3 CPOX COL8A1 TBC1D23 LNP1 TMEM45A ADGRG7 SENP7 CEP97 STX19 DHFR2 NSUN3 RIOX2 GABRR3 OR5AC2 OR5H1 OR5H14 OR5H15 OR5H6 OR5H2 OR5K4 OR5K3 OR5K1 OR5K2 CLDND1 GPR15 ST3GAL6 NIT2 TOMM70 TFG IMPG2 TRMT10C PCNP ZBTB11 RPL24 NXPE3 NFKBIZ ZPLD1		2	C1_St151557259	1	151557259	152349078	5.75598	0	0.0368486	SNX27 RORC CELF3 RIIAD1 MRPL9 OAZ3 TDRKH LINGO4 C2CD4D THEM5 THEM4 S100A10 S100A11 LOC100131107 TCHHL1 TCHH RPTN HRNR FLG FLG2		2	C2_St27543562	2	27543562	27606098	4	1	0.0344786	MPV17 GTF3C2 EIF2B4 SNX17 ZNF513 PPM1G		2	C1_St155083943	1	155083943	155685477	6.89254	2.3941	0.0172749	ASH1L MSTO1 EFNA1 SLC50A1 DPM3 KRTCAP2 TRIM46 MUC1 THBS3 MTX1 GBA FAM189B SCAMP3 CLK2 HCN3 PKLR FDPS RUSC1 YY1AP1 DAP3
3	C8_St67901608	8	67901608	67911992	7	2	0.0230141	PPP1R42		3	C3_St104655583	3	104655583	105699882	7	1	0.0405594	ALCAM CBLB		3	C1_St152360185	1	152360185	152443608	5	0	0.0441176	CRNN		3	C2_St27624000	2	27624000	27995931	4	1	0.0344786	NRBP1 PPM1G KRTCAP3 IFT172 FNDC4 GCKR C2orf16 ZNF512 CCDC121 GPN1 SUPT7L SLC4A1AP MRPL33		3	C1_St155992788	1	155992788	155993456	6	3	0.046141
4	C8_St68262739	8	68262739	68282392	7	2	0.0230141			4	C3_St121838320	3	121838320	122211722	5	0	0.0336538	KPNA1 CD86 CASR CSTA CCDC58 FAM162A WDR5B		4	C1_St154849772	1	154849772	156351699	6.05235	0	0.0300619	SMG5 PBXIP1 EFNA3 ASH1L MSTO1 SYT11 LMNA PMVK PYGO2 LOC101928120 SHC1 CKS1B FLAD1 LENEP ZBTB7B DCST2 DCST1 ADAM15 EFNA4 EFNA1 SLC50A1 DPM3 KRTCAP2 TRIM46 MUC1 THBS3 MTX1 GBA FAM189B SCAMP3 CLK2 HCN3 PKLR FDPS RUSC1 YY1AP1 DAP3 GON4L RIT1 KHDC4 RXFP4 ARHGEF2 SSR2 UBQLN4 LAMTOR2 RAB25 MEX3A SEMA4A SLC25A44 PMF1 PMF1-BGLAP BGLAP PAQR6 TMEM79 GLMP VHLL CCT3 TSACC RHBG		4	C2_St141251510	2	141251510	141252447	4	1	0.0344786	LRP1B		4	C1_St156024736	1	156024736	156025013	6	3	0.046141	LAMTOR2
5	C8_St70571314	8	70571314	70576130	7	2	0.0230141	SULF1		5	C3_St122225455	3	122225455	123358278	5	0	0.0336538	SEMA5B KPNA1 DTX3L PARP14 DIRC2 PDIA5 SEC22A ADCY5 MYLK PARP9 PARP15 HSPBAP1 HACD2		5	C1_St224393212	1	224393212	227195728	5	0	0.0441176	LIN9 DNAH14 CNIH3 ENAH SRP9 ACBD3 STUM ITPKB COQ8A CDC42BPA NVL CNIH4 WDR26 LBR EPHX1 TMEM63A LEFTY1 PYCR2 LEFTY2 SDE2 H3F3A MIXL1 PARP1 PSEN2		5	C2_St177929007	2	177929007	178487729	4	1	0.0344786	AGPS NFE2L2 HNRNPA3 TTC30B TTC30A		5	C1_St156098621	1	156098621	156102476	6	3	0.046141	LMNA
6	C8_St70794548	8	70794548	70797717	7	2	0.0230141			6	C3_St124437300	3	124437300	129084581	5	0	0.0336538	ALDH1L1 EEFSEC COPG1 KALRN ITGB5 MUC13 SLC12A8 ZNF148 SNX4 OSBPL11 ROPN1B UROC1 TXNRD3 CHCHD6 PLXNA1 MGLL KBTBD12 RUVBL1 RAB7A KIAA1257 ISY1-RAB43 UMPS HEG1 ALG1L SLC41A3 KLF15 CFAP100 ZXDC CHST13 C3orf22 TXNRD3NB C3orf56 TPRA1 MCM2 PODXL2 ABTB1 SEC61A1 DNAJB8 GATA2 RPN1 ACAD9 EFCC1 GP9 RAB43 ISY1 CNBP HMCES H1FX		6	C1_St227199719	1	227199719	227304180	5	0	0.0441176	CDC42BPA		6	C3_St14195282	3	14195282	14361537	5	2	0.0282761	XPC LSM3		6	C1_St228430373	1	228430373	228435029	5	1	0.0184251	OBSCN
7	C8_St71029633	8	71029633	71035488	7	2	0.0230141	NCOA2		7	C3_St129098560	3	129098560	129550196	5	0	0.0336538	IFT122 TMCC1 EFCAB12 MBD4 RHO H1FOO PLXND1		7	C1_St227311067	1	227311067	228450531	5	0	0.0441176	CDC42BPA ZNF678 SNAP47 WNT3A OBSCN JMJD4 PRSS38 WNT9A ARF1 C1orf35 MRPL55 GUK1 GJC2 IBA57		7	C3_St16748532	3	16748532	18846456	4	1	0.0344786	PLCL2 TBC1D5 LOC339862 SATB1		7	C1_St232174174	1	232174174	232181815	5	1	0.0184251	DISC1
8	C8_St71179583	8	71179583	71181826	7	2	0.0230141	NCOA2		8	C3_St129574473	3	129574473	138071604	5	0	0.0336538	CEP63 BFSP2 STAG1 TMCC1 COL6A5 COL6A6 PIK3R4 ATP2C1 NEK11 MRPL3 CPNE4 DNAJC13 UBA5 TMEM108 CDV3 RAB6B SLCO2A1 RYK AMOTL2 KY EPHB1 PPP2R3A IL20RB DBR1 NME9 TRH ALG1L2 ASTE1 NUDT16 ACPP ACAD11 ACKR4 NPHP3 TOPBP1 TF SRPRB C3orf36 ANAPC13 MSL2 PCCB SLC35G2 NCK1 SOX14 CLDN18 DZIP1L A4GNT ARMC8 MRAS		8	C1_St228568160	1	228568160	231963491	5	0	0.0441176	TRIM11 NUP133 URB2 GALNT2 PGBD5 COG2 TTC13 TRIM67 EXOC8 DISC1 TRIM17 HIST3H3 HIST3H2A HIST3H2BB RNF187 BTNL10 RHOU RAB4A SPHAR CCSAP ACTA1 ABCB10 TAF5L AGT CAPN9 C1orf198 ARV1 FAM89A LOC149373 C1orf131 GNPAT SPRTN EGLN1 TSNAX		8	C3_St95808781	3	95808781	96857212	6	4	0.046141	EPHA6		8	C6_St951386	6	951386	1408677	3	0	0.0461538	FOXQ1 FOXF2
9	C8_St73519817	8	73519817	73748161	8	3	0.0197666	KCNB2		9	C3_St138078156	3	138078156	173079931	5.81368	0	0.0173299	PCOLCE2 MED12L P2RY14 IQCJ-SCHIP1 SCHIP1 GOLIM4 PIK3CB CP MBNL1 GPR149 KCNAB1 PQLC2L MECOM PHC3 TNIK FNDC3B CEP70 MRPS22 NMNAT3 CLSTN2 SPSB4 ZBTB38 RASA2 TFDP2 XRN1 ATR PLS1 TRPC1 U2SURP SLC9A9 HLTF WWTR1 RNF13 PFN2 SELENOT SIAH2 ARHGEF26 DHX36 PLCH1 LEKR1 VEPH1 PTX3 RSRC1 IQCJ IFT80 PPM1L NMD3 SPTSSB OTOL1 SI BCHE ZBBX WDR49 SERPINI1 PRKCI SLC7A14 PLD1 TMEM212 TNFSF10 NCEH1 ECT2 SPATA16 MRAS ESY…		9	C1_St231984518	1	231984518	234264787	5	0	0.0441176	DISC1 PCNX2 SLC35F3 SIPA1L2 MAP10 NTPCR MAP3K21 KCNK1		9	C3_St97011219	3	97011219	99037897	6	4	0.046141	ARL6 DCBLD2 EPHA6 CRYBG3 CPOX RIOX2 GABRR3 OR5AC2 OR5H1 OR5H14 OR5H15 OR5H6 OR5H2 OR5K4 OR5K3 OR5K1 OR5K2 CLDND1 GPR15 ST3GAL6		9	C6_St1418161	6	1418161	3175391	3	0	0.0461538	GMDS BPHL MYLK4 NQO2 FOXC1 WRNIP1 SERPINB1 SERPINB9 SERPINB6 RIPK1 TUBB2A
10	C8_St73760310	8	73760310	74034680	8	3	0.0197666	KCNB2 TERF1 SBSPON		10	C3_St173085056	3	173085056	173849524	5	0	0.0336538	NLGN1		10	C1_St234557919	1	234557919	238596515	5	0	0.0441176	LYST MTR TOMM20 ARID4B TBCE B3GALNT2 GNG4 NID1 GPR137B EDARADD LGALS8 HEATR1 RYR2 TARBP1 IRF2BP2 RBM34 GGPS1 ERO1B ACTN2 MT1HL1 ZP4		10	C3_St100924204	3	100924204	100936248	6	4	0.046141			10	C6_St3410248	6	3410248	4012385	3	0	0.0461538	SLC22A23 PXDC1 FAM50B
11	C8_St74047836	8	74047836	74394066	8	3	0.0197666	STAU2 C8orf89 RPL7 RDH10		11	C3_St173866798	3	173866798	196870581	5.05918	0	0.0323346	VPS8 NAALADL2 KCNMB2 MRPL47 CCDC39 YEATS2 P3H2 FGF12 ACAP2 UBXN7 NLGN1 TBL1XR1 ZMAT3 PIK3CA ZNF639 USP13 PEX5L ATP11B LAMP3 MCF2L2 B3GNT5 KLHL6 KLHL24 AP2M1 PSMD2 LINC02054 EPHB3 C3orf70 EHHADH MAP3K13 SENP2 IGF2BP2 DGKG HRG RFC4 ST6GAL1 LPP TPRG1 TP63 IL1RAP GMNC OSTN CCDC50 MB21D2 ATP13A5 ATP13A4 OPA1 HES1 GP5 LSG1 XXYLT1 APOD SLC51A RNF168 PAK2 SENP5 MELTF DLG1 KCNMB3 MFN1 GNB4 ACTL6A NDUFB5 T…		11	C1_St238613142	1	238613142	242878998	5	0	0.0441176	RGS7 CHRM3 FMN2 KMO WDR64 PLD5 GREM2 FH OPN3 CHML EXO1 BECN2 MAP1LC3C		11	C3_St102198170	3	102198170	102222752	6	4	0.046141	ZPLD1		11	C6_St24347625	6	24347625	24370358	3	0	0.0461538	DCDC2 KAAG1
12	C8_St74416024	8	74416024	78500065	8	3	0.0197666	STAU2 ZFHX4 UBE2W PI15 HNF4G ELOC TMEM70 LY96 JPH1 GDAP1 CRISPLD1 PEX2		12	C8_St79511656	8	79511656	79516759	8	2	0.034965	PKIA		12	C1_St242881599	1	242881599	243396326	5	0	0.0441176	CEP170		12	C3_St104212962	3	104212962	104300275	6	4	0.046141			12	C8_St52430804	8	52430804	52444193	2	11	0.0414053	PXDNL
13	C8_St78519796	8	78519796	78580196	8	3	0.0197666			13	C8_St79743690	8	79743690	79756591	8	2	0.034965			13	C1_St243402722	1	243402722	246254537	5	0	0.0441176	KIF26B SMYD3 CEP170 SDCCAG8 AKT3 ADSS CATSPERE DESI2 EFCAB2 ZBTB18 C1orf100 COX20 HNRNPU		13	C3_St156786545	3	156786545	156795525	6	4	0.046141			13	C8_St97643213	8	97643213	97663316	2	11	0.0414053	CPQ
14	C8_St78593900	8	78593900	79283918	8	3	0.0197666			14	C8_St100521589	8	100521589	100529826	8	2	0.034965	VPS13B		14	C1_St246281587	1	246281587	247542052	5	0	0.0441176	SMYD3 ZNF496 CNST AHCTF1 ZNF670 ZNF124 TFB2M SCCPDH ZNF695 ZNF669 C1orf229 VN1R5		14	C3_St158388781	3	158388781	158404267	6	4	0.046141	GFM1 LXN		14	C8_St101050703	8	101050703	101063441	2	11	0.0414053	RGS22
15	C8_St79306179	8	79306179	79516759	8	3	0.0197666	PKIA		15	C8_St101095560	8	101095560	101110719	8	2	0.034965	RGS22		15	C1_St247550332	1	247550332	248187665	5	0	0.0441176	NLRP3 GCSAML OR2L13 OR2B11 OR2W5 OR2C3 OR2G2 OR2G3 OR13G1 OR6F1 OR1C1 OR14A16 OR11L1 TRIM58 OR2W3 OR2T8 OR2L8 OR2AK2 OR2L5		15	C3_St167561440	3	167561440	167745400	7	5	0.0375286	GOLIM4		15	C8_St102637196	8	102637196	102689988	3	12	0.0426168	GRHL2
16	C8_St79519365	8	79519365	79552643	8	3	0.0197666			16	C8_St102637196	8	102637196	103302709	9	3	0.0192308	NCALD GRHL2 UBR5 RRM2B		16	C3_St93517444	3	93517444	95808780	5	0	0.0441176	ARL13B PROS1 STX19 DHFR2 NSUN3		16	C3_St167749516	3	167749516	168511943	7	4.9765	0.036964	GOLIM4		16	C8_St103739705	8	103739705	103960710	3	12	0.0426168	AZIN1
17	C8_St80290563	8	80290563	80398163	8	3	0.0197666			17	C8_St103319059	8	103319059	103413913	9	3	0.0192308	UBR5		17	C3_St99037898	3	99037898	100924203	5	0	0.0441176	ABI3BP CMSS1 FILIP1L COL8A1 TBC1D23 LNP1 TMEM45A ADGRG7 NIT2 TOMM70 TFG		17	C3_St168865152	3	168865152	168871394	7	5	0.0375286	MECOM		17	C8_St108649073	8	108649073	108660612	2	11	0.0414053
18	C8_St80412542	8	80412542	80630850	8	3	0.0197666	STMN2		18	C8_St103429576	8	103429576	103960710	9	3	0.0192308	ODF1 KLF10 AZIN1		18	C3_St100936249	3	100936249	102198169	5	0	0.0441176	SENP7 CEP97 IMPG2 TRMT10C PCNP ZBTB11 RPL24 NXPE3 NFKBIZ ZPLD1		18	C3_St168903974	3	168903974	171404478	7.1639	4.01905	0.013233	MECOM PHC3 TNIK PRKCI SLC7A14 PLD1 ACTRT3 MYNN LRRC34 LRRIQ4 LRRC31 SAMD7 SEC62 GPR160 SKIL CLDN11 RPL22L1 EIF5A2 SLC2A2		18	C8_St119293912	8	119293912	119312117	2	11	0.0414053	SAMD12
19	C8_St81801540	8	81801540	82218066	8	3	0.0197666	PAG1 FABP5		19	C8_St113319755	8	113319755	113321170	8	2	0.034965	CSMD3		19	C3_St102222753	3	102222753	104212961	5	0	0.0441176			19	C3_St171421902	3	171421902	172349216	6	3.98393	0.0458443	FNDC3B PLD1 TMEM212 TNFSF10 NCEH1 GHSR		19	C8_St120342015	8	120342015	120357114	2	11	0.0414053
20	C8_St82244170	8	82244170	82493729	8	3	0.0197666	FABP12 PMP2 FABP9 FABP4		20	C8_St113402314	8	113402314	113404639	8	2	0.034965	CSMD3		20	C3_St137208726	3	137208726	141022487	5	0	0.0441176	PIK3CB DBR1 NME9 CEP70 MRPS22 NMNAT3 CLSTN2 SPSB4 SOX14 CLDN18 DZIP1L A4GNT ARMC8 MRAS ESYT3 FAIM FOXL2 FOXL2NB PRR23A PRR23B PRR23C COPB2 RBP2 RBP1 TRIM42 SLC25A36 PXYLP1		20	C3_St172365620	3	172365620	172888571	6	3.97105	0.0456065	NCEH1 ECT2 SPATA16		20	C8_St126766586	8	126766586	126980901	3	12	0.0426168
21	C8_St82504000	8	82504000	82838970	8	3	0.0197666	IMPA1 SLC10A5 ZFAND1 CHMP4C SNX16		21	C8_St113549529	8	113549529	113549993	8	2	0.034965	CSMD3		21	C3_St142362403	3	142362403	143809274	5	0	0.0441176	PCOLCE2 PLS1 TRPC1 U2SURP SLC9A9 PAQR9 CHST2 C3orf58		21	C3_St187633269	3	187633269	187866388	6	4	0.046141			21	C8_St128737415	8	128737415	134644543	2.00587	11.0081	0.041351	WISP1 ASAP1 KCNQ3 FAM49B ADCY8 OC90 PHF20L1 TG SLA ST3GAL1 MYC GSDMC EFR3A HHLA1 LRRC6 TMEM71 NDRG1
22	C8_St84541921	8	84541921	84584581	8	3	0.0197666			22	C8_St115236165	8	115236165	115916924	8	2	0.034965			22	C3_St143819654	3	143819654	156786544	5.10605	0	0.0430979	MED12L P2RY14 CP MBNL1 GPR149 KCNAB1 HLTF WWTR1 RNF13 PFN2 SELENOT SIAH2 ARHGEF26 DHX36 PLCH1 LEKR1 PLOD2 PLSCR4 PLSCR2 PLSCR1 PLSCR5 ZIC4 ZIC1 AGTR1 CPB1 CPA3 GYG1 HPS3 TM4SF18 TM4SF1 TM4SF4 COMMD2 ANKUB1 TMEM183B TSC22D2 SERP1 EIF2A ERICH6 CLRN1 GPR171 GPR87 P2RY13 P2RY12 IGSF10 AADACL2 AADAC SUCNR1 P2RY1 RAP2B C3orf79 MME C3orf33 SLC33A1 GMPS SSR3 TIPARP		22	C3_St187870779	3	187870779	188280273	6	4	0.046141	LPP		22	C8_St134646399	8	134646399	136390657	2	11	0.0414053	ZFAT
23	C8_St84595023	8	84595023	85444025	8	3	0.0197666	RALYL		23	C8_St116170578	8	116170578	116195862	8	2	0.034965			23	C3_St156795526	3	156795526	158388780	5	0	0.0441176	PQLC2L VEPH1 PTX3 RSRC1 CCNL1 SHOX2 MLF1 GFM1 LXN		23	C3_St193498684	3	193498684	194217544	6	4	0.046141	HES1 GP5 CPN2 LRRC15 ATP13A3		23	C8_St136408718	8	136408718	137600653	2	11	0.0414053	KHDRBS3
24	C8_St85468281	8	85468281	88156383	8	3	0.0197666	CNBD1 RALYL E2F5 CA1 CA2 ATP6V0D2 WWP1 CPNE3 CNGB3 LRRCC1 C8orf59 CA13 CA3 PSKH2 SLC7A13 RMDN1		24	C8_St120932913	8	120932913	120934904	8	2	0.034965	DEPTOR		24	C3_St158404268	3	158404268	168431148	5.42117	0	0.040068	IQCJ-SCHIP1 SCHIP1 GOLIM4 IQCJ IFT80 PPM1L NMD3 SPTSSB OTOL1 SI BCHE ZBBX WDR49 SERPINI1 GFM1 RARRES1 MFSD1 IL12A C3orf80 SMC4 TRIM59 KPNA4 ARL14 B3GALNT1 SLITRK3 SERPINI2 PDCD10		24	C7_St108673516	7	108673516	109216563	3	0	0.0323077			24	C8_St137885495	8	137885495	139852384	2	11	0.0414053	FAM135B COL22A1
25	C8_St88178056	8	88178056	88451088	8	3	0.0197666	CNBD1		25	C8_St128737415	8	128737415	128785234	9	3	0.0192308	MYC		25	C3_St168449066	3	168449066	168951612	5.76767	0	0.0367362	MECOM		25	C7_St126414349	7	126414349	126563643	3	0	0.0323077	GRM8		25	C8_St139859314	8	139859314	139982997	2	11	0.0414053	COL22A1
26	C8_St88465535	8	88465535	89080321	8	3	0.0197666	MMP16 DCAF4L2		26	C8_St137600654	8	137600654	137823113	8	2	0.034965			26	C3_St173386911	3	173386911	174621939	5	0	0.0441176	NAALADL2 NLGN1		26	C7_St130404777	7	130404777	130789543	3	0	0.0323077	KLF14		26	C8_St140006610	8	140006610	140249013	2	11	0.0414053
27	C8_St89093396	8	89093396	93443457	8	3	0.0197666	SLC26A7 MMP16 NBN CALB1 NECAB1 PIP4P2 LRRC69 RUNX1T1 RIPK2 OSGIN2 DECR1 TMEM64 C8orf88 OTUD6B		27	C8_St137840401	8	137840401	137885494	8	2	0.034965			27	C3_St175939205	3	175939205	176203825	5	0	0.0441176			27	C7_St138479310	7	138479310	139102490	3	0	0.0323077	ATP6V0A4 KIAA1549 UBN2 LUC7L2 C7orf55-LUC7L2 TMEM213 ZC3HAV1L ZC3HAV1 TTC26 FMC1		27	C8_St140274672	8	140274672	140309909	2	11	0.0414053
28	C8_St93457138	8	93457138	97513199	8	3	0.0197666	RAD54B SDC2 CDH17 VIRMA ESRP1 TP53INP1 MTERF3 TRIQK C8orf87 FAM92A RBM12B TMEM67 PDP1 GEM FSBP DPY19L4 INTS8 CCNE2 NDUFAF6 PLEKHF2 C8orf37 GDF6 UQCRB PTDSS1		28	C9_St33025504	9	33025504	33641293	5	0	0.0336538	ANKRD18B DNAJA1 B4GALT1 NFX1 SMU1 SPINK4 BAG1 CHMP5 AQP7 AQP3 NOL6		28	C3_St176215080	3	176215080	178887446	5	0	0.0441176	KCNMB2 TBL1XR1 ZMAT3 PIK3CA		28	C7_St151171663	7	151171663	151990148	3	0	0.0323077	KMT2C PRKAG2 GALNT11 RHEB GALNTL5		28	C8_St140335815	8	140335815	141924051	2	11	0.0414053	AGO2 KCNK9 TRAPPC9 PTK2 CHRAC1
29	C8_St97517390	8	97517390	97885269	8	2.94535	0.0189858	SDC2 CPQ		29	C12_St31239506	12	31239506	32514115	5	0	0.0336538	SINHCAF BICD1 DENND5B AMN1 KIAA1551 DDX11 ETFBKMT H3F3C		29	C3_St194841954	3	194841954	196870581	5	0	0.0441176	ACAP2 UBXN7 XXYLT1 APOD SLC51A RNF168 PAK2 SENP5 MELTF DLG1 PPP1R2 MUC20 MUC4 TNK2 TFRC ZDHHC19 PCYT1A TCTEX1D2 TM4SF19 SMCO1 WDR53 FBXO45 NRROS CEP19 PIGX NCBP2 PIGZ		29	C8_St3007505	8	3007505	3007946	3	0	0.0323077	CSMD1		29	C8_St141927660	8	141927660	144182157	2	11	0.0414053	PTK2 MROH5 TSNARE1 GML DENND3 SLC45A4 LOC105375787 GPR20 PTP4A3 ADGRB1 ARC JRK PSCA LY6K THEM6 SLURP1 LYPD2 LYNX1-SLURP2 SLURP2 LYNX1 LY6D CYP11B1 CYP11B2 LY6E
30	C8_St97892349	8	97892349	98766434	8	3	0.0197666	CPQ MTDH TSPYL5		30	C17_St35766476	17	35766476	35813380	5	0	0.0336538	ACACA TADA2A		30	C17_St51504321	17	51504321	52155632	5	0	0.0441176	KIF2B		30	C8_St3024505	8	3024505	3025657	3	0	0.0323077	CSMD1		30	C8_St144201855	8	144201855	144807456	2	11	0.0414053	TOP1MT ZC3H3 LY6H GPIHBP1 ZFP41 GLI4 ZNF696 RHPN1 MAFA GSDMD MROH6 NAPRT EEF1D TIGD5 PYCR3 TSTA3 ZNF623 ZNF707 CCDC166 MAPK15 FAM83H
31	C8_St98784081	8	98784081	100243248	8	3	0.0197666	VPS13B STK3 LAPTM4B MATN2 ERICH5 NIPAL2 RPL30 RIDA POP1 KCNS2 OSR2		31	C17_St36102382	17	36102382	36108367	6	0	0.0113636	HNF1B		31	C17_St53331345	17	53331345	53752080	5	0	0.0441176	MMD HLF		31	C8_St3786824	8	3786824	3805838	3	0	0.0323077	CSMD1		31	C8_St144836609	8	144836609	145042001	2	11	0.0414053	SCRIB PUF60 NRBP2 EPPK1 PLEC
32	C8_St100257073	8	100257073	103302709	8.21851	3.197	0.0176212	VPS13B NCALD RGS22 SPAG1 RNF19A GRHL2 UBR5 COX6C FBXO43 POLR2K ANKRD46 SNX31 PABPC1 YWHAZ ZNF706 RRM2B		32	C20_St30066288	20	30066288	30232452	5	0	0.0336538	HM13 REM1 ID1 COX4I2		32	C22_St21300309	22	21300309	22336512	5	0	0.0441176	MAPK1 PPM1F CRKL AIFM3 LZTR1 THAP7 P2RX6 SLC7A4 LRRC74B RIMBP3B HIC2 TMEM191C RIMBP3C UBE2L3 YDJC CCDC116 SDF2L1 PPIL2 YPEL1 TOP3B		32	C8_St8687326	8	8687326	8696449	3	0	0.0323077	MFHAS1		32	C8_St145046494	8	145046494	145709990	1.99971	11	0.041395	SPATC1 MROH1 CPSF1 PLEC PARP10 GRINA OPLAH EXOSC4 GPAA1 CYC1 SHARPIN MAF1 WDR97 HGH1 BOP1 SCX HSF1 DGAT1 SCRT1 TMEM249 FBXL6 SLC52A2 ADCK5 SLC39A4 VPS28 TONSL CYHR1 KIFC2 FOXH1 PPP1R16A
33	C8_St103319059	8	103319059	103413913	9	4	0.0108359	UBR5		33	C20_St30234801	20	30234801	30324045	5	0	0.0336538	BCL2L1		33	C22_St22508433	22	22508433	22561610	5	0	0.0441176			33	C8_St9104832	8	9104832	9113029	3	0	0.0323077			33	C10_St88418684	10	88418684	88436490	3	0	0.0461538	LDB3 OPN4
34	C8_St103429576	8	103429576	104022269	8.89614	3.52325	0.00887737	ODF1 KLF10 AZIN1		34	C20_St31891004	20	31891004	32003944	5	0	0.0336538	CDK5RAP1 BPIFB1 SNTA1		34	C22_St23646513	22	23646513	24056537	5	0	0.0441176	BCR IGLL1 DRICH1 RGL4		34	C8_St52269610	8	52269610	53338897	8	5.98748	0.014421	PXDNL ST18 PCMTD1		34	C10_St88599928	10	88599928	88602314	3	0	0.0461538	BMPR1A
35	C8_St104028267	8	104028267	106537714	8	3	0.0197666	RIMS2 ATP6V1C1 BAALC FZD6 LRP12 ZFPM2 CTHRC1 SLC25A32 DCAF13 DCSTAMP DPYS		35	C20_St32010852	20	32010852	33667560	5.56186	0	0.0211299	MYH7B CBFA2T2 ZNF341 RALY AHCY ITCH PIGU TP53INP2 SNTA1 NECAB3 C20orf144 ACTL10 E2F1 PXMP4 CHMP4B EIF2S2 ASIP DYNLRB1 MAP1LC3A NCOA6 GGT7 ACSS2 GSS TRPC4AP		35	C22_St24394089	22	24394089	24800104	5.20685	0	0.0421287	CABIN1 SPECC1L SUSD2 GGT5		35	C8_St67901608	8	67901608	67911992	7	5	0.0375286	PPP1R42		35	C10_St98863025	10	98863025	98874113	3	0	0.0461538	SLIT1
36	C8_St107515769	8	107515769	108066634	8	3	0.0197666	OXR1 ABRA		36	C20_St39662843	20	39662843	45572360	5	0	0.0336538	ZHX3 PTPRT HNF4A TOP1 LPIN3 CHD6 SGK2 MYBL2 TOX2 TTPAL ADA RIMS4 YWHAB STK4 EPPIN-WFDC6 EPPIN DNTTIP1 PCIF1 NCOA5 CDH22 SLC13A3 SLC2A10 EYA2 PLCG1 EMILIN3 SRSF6 L3MBTL1 IFT52 GTSF1L JPH2 OSER1 GDAP1L1 FITM2 R3HDML SERINC3 PKIG WISP2 KCNK15 PABPC1L TOMM34 KCNS1 WFDC5 WFDC12 PI3 SEMG1 SEMG2 SLPI MATN4 RBPJL SDC4 SYS1 TP53TG5 DBNDD2 PIGT WFDC2 SPINT3 WFDC6 WFDC8 WFDC9 WFDC10A WFDC11 WFDC10B WFDC13 S…		36	C22_St40923273	22	40923273	41018165	5	0	0.0441176	MKL1		36	C8_St68262739	8	68262739	68282392	7	5	0.0375286			36	C14_St50489506	14	50489506	50742249	3	0	0.0461538	SOS2 L2HGDH VCPKMT
37	C8_St108080076	8	108080076	108871589	8	2.98542	0.0195583	ANGPT1		37	C20_St45594712	20	45594712	45986984	5	0	0.0336538	EYA2 ZMYND8		37	C22_St41024065	22	41024065	41028091	5	0	0.0441176	MKL1		37	C8_St70571314	8	70571314	70576130	7	5	0.0375286	SULF1		37	C14_St68405245	14	68405245	68878369	3	0	0.0461538	RAD51B
38	C8_St108888651	8	108888651	110627116	8	3	0.0197666	RSPO2 TRHR PKHD1L1 SYBU EIF3E EMC2 TMEM74 NUDCD1 ENY2 EBAG9		38	C20_St46001679	20	46001679	46163211	5	0	0.0336538	NCOA3		38	C22_St41033802	22	41033802	41153879	5	0	0.0441176	MCHR1		38	C8_St70794548	8	70794548	70797717	7	5	0.0375286			38	C14_St73569476	14	73569476	73894496	3	0	0.0461538	RBM25 PSEN1 NUMB PAPLN
39	C8_St110643296	8	110643296	110856481	8	3	0.0197666	SYBU LOC100132813		39	C20_St60658405	20	60658405	60680278	5	0	0.0336538													39	C8_St71029633	8	71029633	71035488	7	5	0.0375286	NCOA2		39	C17_St60459667	17	60459667	60809905	3	0	0.0461538	MARCH10 TLK2 EFCAB3 METTL2A MRC2
40	C8_St110878096	8	110878096	111503988	8	3	0.0197666	KCNV1																						40	C8_St71179583	8	71179583	71181826	7	5	0.0375286	NCOA2		40	C18_St51856028	18	51856028	52290182	3	0	0.0461538	C18orf54 STARD6 DYNAP
41	C8_St111519766	8	111519766	112056131	8	3	0.0197666																							41	C8_St73519817	8	73519817	73748161	8	6	0.0144622	KCNB2		41	C22_St24418454	22	24418454	24421844	6	3	0.046141	CABIN1
42	C8_St112079212	8	112079212	112848726	8	3	0.0197666																							42	C8_St73760310	8	73760310	74034680	8	6	0.0144622	KCNB2 TERF1 SBSPON		42	CX_St88431725	X	88431725	88448058	3	0	0.0461538
43	C8_St113656822	8	113656822	113689103	8	3	0.0197666	CSMD3																						43	C8_St74047836	8	74047836	74394066	8	6	0.0144622	STAU2 C8orf89 RPL7 RDH10		43	CX_St92653386	X	92653386	95419109	3	0	0.0461538
44	C8_St113872442	8	113872442	113873684	8	3	0.0197666	CSMD3																						44	C8_St74416024	8	74416024	78500065	8	6	0.0144622	STAU2 ZFHX4 UBE2W PI15 HNF4G ELOC TMEM70 LY96 JPH1 GDAP1 CRISPLD1 PEX2		44	CX_St112551738	X	112551738	113503022	3	0	0.0461538
45	C8_St114038210	8	114038210	114117470	8	3	0.0197666	CSMD3																						45	C8_St78519796	8	78519796	78580196	8	6	0.0144622
46	C8_St114302709	8	114302709	114368598	8	3	0.0197666	CSMD3																						46	C8_St78593900	8	78593900	79283918	8	6	0.0144622
47	C8_St114378475	8	114378475	114390147	8	3	0.0197666	CSMD3																						47	C8_St79306179	8	79306179	79516759	8	5.97577	0.0143824	PKIA
48	C8_St116539068	8	116539068	116540972	8	3	0.0197666	TRPS1																						48	C8_St79519365	8	79519365	79911851	8	6.88234	0.0336032	IL7 ZC2HC1A
49	C8_St117023202	8	117023202	120034387	8	2.99395	0.0196802	SAMD12 EIF3H SLC30A8 EXT1 COLEC10 UTP23 RAD21 AARD MED30 TNFRSF11B																						49	C8_St79918666	8	79918666	80040051	8	7	0.0361556
50	C8_St120044830	8	120044830	120941665	8	2.98316	0.019526	ENPP2 COLEC10 DSCC1 DEPTOR MAL2 NOV TAF2																						50	C8_St80056625	8	80056625	80398163	8	6.68495	0.0293212
51	C8_St120943508	8	120943508	121875083	8	3	0.0197666	SNTB1 DEPTOR COL14A1 MTBP MRPL13																						51	C8_St80412542	8	80412542	82218066	8	6.64839	0.0285281	MRPS28 TPD52 ZNF704 PAG1 STMN2 HEY1 ZBTB10 FABP5
52	C8_St121896826	8	121896826	122621168	8	3	0.0197666																							52	C8_St82244170	8	82244170	82493729	8	6	0.0144622	FABP12 PMP2 FABP9 FABP4
53	C8_St122634105	8	122634105	125872784	8	3	0.0197666	ZHX2 TBC1D31 ZHX1-C8orf76 ATAD2 FBXO32 FER1L6 MTSS1 HAS2 DERL1 FAM83A C8orf76 ZHX1 WDYHV1 KLHL38 ANXA13 FAM91A1 TMEM65 TRMT12 RNF139 TATDN1 NDUFB9																						53	C8_St82504000	8	82504000	84584581	8	6.8185	0.0322182	IMPA1 SLC10A5 ZFAND1 CHMP4C SNX16
54	C8_St126766586	8	126766586	145715105	7.99295	2.10583	0.00712384	WISP1 ASAP1 KCNQ3 FAM135B AGO2 FAM49B ADCY8 OC90 PHF20L1 TG SLA ST3GAL1 ZFAT KHDRBS3 COL22A1 KCNK9 TRAPPC9 PTK2 MROH5 TSNARE1 GML TOP1MT ZC3H3 SPATC1 MROH1 CPSF1 FAM84B POU5F1B MYC GSDMC EFR3A HHLA1 LRRC6 TMEM71 NDRG1 CHRAC1 DENND3 SLC45A4 LOC105375787 GPR20 PTP4A3 ADGRB1 ARC JRK PSCA LY6K THEM6 SLURP1 LYPD2 LYNX1-SLURP2 SLURP2 LYNX1 LY6D CYP11B1 CYP11B2 LY6E LY6H GPIHBP1 ZFP41 GLI4 ZNF696 RHPN1 …																						54	C8_St84595023	8	84595023	85444025	8	6	0.0144622	RALYL
55	C9_St9673912	9	9673912	9763352	4	0	0.0325077	PTPRD																						55	C8_St85468281	8	85468281	88156383	8	6	0.0144622	CNBD1 RALYL E2F5 CA1 CA2 ATP6V0D2 WWP1 CPNE3 CNGB3 LRRCC1 C8orf59 CA13 CA3 PSKH2 SLC7A13 RMDN1
56	C9_St9777073	9	9777073	10054740	4	0	0.0325077	PTPRD																						56	C8_St88178056	8	88178056	88451088	8	6	0.0144622	CNBD1
57	C9_St10076681	9	10076681	10088517	4	0	0.0325077	PTPRD																						57	C8_St88465535	8	88465535	89080321	8	6	0.0144622	MMP16 DCAF4L2
58	C9_St23371942	9	23371942	23971815	4	0	0.0325077	ELAVL2																						58	C8_St89093396	8	89093396	93443457	8	6	0.0144622	SLC26A7 MMP16 NBN CALB1 NECAB1 PIP4P2 LRRC69 RUNX1T1 RIPK2 OSGIN2 DECR1 TMEM64 C8orf88 OTUD6B
59	C9_St24424200	9	24424200	25829551	4	0	0.0325077	IZUMO3 TUSC1																						59	C8_St93457138	8	93457138	97513199	8	6	0.0144622	RAD54B SDC2 CDH17 VIRMA ESRP1 TP53INP1 MTERF3 TRIQK C8orf87 FAM92A RBM12B TMEM67 PDP1 GEM FSBP DPY19L4 INTS8 CCNE2 NDUFAF6 PLEKHF2 C8orf37 GDF6 UQCRB PTDSS1
60	C9_St25839354	9	25839354	27516590	4	0	0.0325077	LOC100506422 CAAP1 IFT74 LRRC19 TEK MOB3B PLAA EQTN																						60	C8_St97517390	8	97517390	97885269	8	5.94535	0.0142822	SDC2 CPQ
61	C9_St27533985	9	27533985	27792012	4	0	0.0325077	C9orf72																						61	C8_St97892349	8	97892349	98766434	8	6	0.0144622	CPQ MTDH TSPYL5
62	C9_St27801911	9	27801911	34581525	4.09083	0	0.0305393	ANKRD18B LINGO2 DDX58 DNAJA1 B4GALT1 NFX1 UBAP2 UBAP1 NUDT2 DNAI1 ACO1 TOPORS NDUFB6 TAF1L TMEM215 APTX SMU1 SPINK4 BAG1 CHMP5 AQP7 AQP3 NOL6 PRSS3 UBE2R2 DCAF12 KIF24 MYORG C9orf24 FAM219A ENHO CNTFR																						62	C8_St98784081	8	98784081	100243248	8	6	0.0144622	VPS13B STK3 LAPTM4B MATN2 ERICH5 NIPAL2 RPL30 RIDA POP1 KCNS2 OSR2
63	C17_St73135594	17	73135594	73488794	4	0	0.0325077	GRB2 JPT1 SLC25A19 SUMO2 NUP85 GGA3 MRPS7 MIF4GD TMEM94																						63	C8_St100257073	8	100257073	104022269	8.34301	6.2692	0.0108825	VPS13B NCALD RGS22 SPAG1 RNF19A GRHL2 UBR5 COX6C FBXO43 POLR2K ANKRD46 SNX31 PABPC1 YWHAZ ZNF706 RRM2B ODF1 KLF10 AZIN1
64	C17_St74313087	17	74313087	74661436	4	0	0.0325077	UBE2O PRPSAP1 ST6GALNAC2 SPHK1 AANAT RHBDF2 CYGB PRCD ST6GALNAC1																						64	C8_St104028267	8	104028267	107022586	8	6.16193	0.0179751	RIMS2 ATP6V1C1 BAALC FZD6 LRP12 ZFPM2 CTHRC1 SLC25A32 DCAF13 DCSTAMP DPYS
65	C17_St76720714	17	76720714	77544723	4.55879	0	0.0203977	CYTH1 USP36 RBFOX3 TIMP2 CEP295NL LGALS3BP CANT1 C1QTNF1 ENGASE																						65	C8_St107044160	8	107044160	107308858	8	7	0.0361556	OXR1
66	C17_St78491690	17	78491690	78505550	5	0	0.0108359																							66	C8_St107342402	8	107342402	108066634	8	6.23938	0.0196552	OXR1 ABRA
67	C17_St78833956	17	78833956	78863360	5	0	0.0108359	RPTOR																						67	C8_St108080076	8	108080076	108871589	8	5.98542	0.0144142	ANGPT1
68	C19_St40906937	19	40906937	40923776	4	0	0.0325077	PRX																						68	C8_St108888651	8	108888651	110627116	8	6	0.0144622	RSPO2 TRHR PKHD1L1 SYBU EIF3E EMC2 TMEM74 NUDCD1 ENY2 EBAG9
69	C19_St45894686	19	45894686	45897227	4	0	0.0325077	PPP1R13L																						69	C8_St110643296	8	110643296	110856481	8	6	0.0144622	SYBU LOC100132813
																														70	C8_St110878096	8	110878096	111503988	8	6	0.0144622	KCNV1
																														71	C8_St111519766	8	111519766	112056131	8	6	0.0144622
																														72	C8_St112079212	8	112079212	112898361	8	6.06059	0.0157767
																														73	C8_St112914819	8	112914819	113261635	8	7	0.0361556	CSMD3
																														74	C8_St113262033	8	113262033	113396625	8	6.98949	0.0359275	CSMD3
																														75	C8_St113398176	8	113398176	113423466	8	6.90806	0.0341611	CSMD3
																														76	C8_St113425048	8	113425048	113551675	8	6.99634	0.0360761	CSMD3
																														77	C8_St113552062	8	113552062	113585274	8	7	0.0361556	CSMD3
																														78	C8_St113587069	8	113587069	113879318	8	6.88529	0.0336672	CSMD3
																														79	C8_St113881554	8	113881554	113946036	8	7	0.0361556	CSMD3
																														80	C8_St113947029	8	113947029	113994751	8	7	0.0361556	CSMD3
																														81	C8_St113996068	8	113996068	114368598	8	6.61037	0.0277031	CSMD3
																														82	C8_St114378475	8	114378475	116290806	8	6.62469	0.0280139	CSMD3
																														83	C8_St116308751	8	116308751	120941665	7.99775	6.14393	0.0178256	SAMD12 ENPP2 TRPS1 EIF3H SLC30A8 EXT1 COLEC10 DSCC1 DEPTOR UTP23 RAD21 AARD MED30 TNFRSF11B MAL2 NOV TAF2
																														84	C8_St120943508	8	120943508	121875083	8	6	0.0144622	SNTB1 DEPTOR COL14A1 MTBP MRPL13
																														85	C8_St121896826	8	121896826	122621168	8	6	0.0144622
																														86	C8_St122634105	8	122634105	126027598	8	6.04562	0.0154519	ZHX2 TBC1D31 ZHX1-C8orf76 ATAD2 FBXO32 FER1L6 MTSS1 HAS2 DERL1 FAM83A C8orf76 ZHX1 WDYHV1 KLHL38 ANXA13 FAM91A1 TMEM65 TRMT12 RNF139 TATDN1 NDUFB9 ZNF572 SQLE
																														87	C8_St126766586	8	126766586	145715105	7.99295	5.10211	0.0118459	WISP1 ASAP1 KCNQ3 FAM135B AGO2 FAM49B ADCY8 OC90 PHF20L1 TG SLA ST3GAL1 ZFAT KHDRBS3 COL22A1 KCNK9 TRAPPC9 PTK2 MROH5 TSNARE1 GML TOP1MT ZC3H3 SPATC1 MROH1 CPSF1 FAM84B POU5F1B MYC GSDMC EFR3A HHLA1 LRRC6 TMEM71 NDRG1 CHRAC1 DENND3 SLC45A4 LOC105375787 GPR20 PTP4A3 ADGRB1 ARC JRK PSCA LY6K THEM6 SLURP1 LYPD2 LYNX1-SLURP2 SLURP2 LYNX1 LY6D CYP11B1 CYP11B2 LY6E LY6H GPIHBP1 ZFP41 GLI4 ZNF696 RHPN1 …
																														88	C9_St204738	9	204738	11774095	3.03275	0	0.0315255	PTPRD SMARCA2 GLIS3 DOCK8 KANK1 DMRT1 RFX3 AK3 RCL1 JAK2 PLGRKT RIC1 MLANA UHRF2 GLDC KDM4C C9orf66 DMRT3 DMRT2 VLDLR KCNV2 PUM3 SLC1A1 SPATA6L PLPP6 CDC37L1 INSL6 INSL4 RLN2 RLN1 CD274 PDCD1LG2 ERMP1 KIAA2026 RANBP6 IL33 TPD52L3 DMAC1
																														89	C9_St12113035	9	12113035	15372220	3	0	0.0323077	ZDHHC21 MPDZ NFIB FREM1 TTC39B TYRP1 LURAP1L CER1
																														90	C9_St15386491	9	15386491	15509198	3	0	0.0323077	PSIP1 SNAPC3
																														91	C9_St15516376	9	15516376	20379884	3	0	0.0323077	BNC2 CCDC171 ADAMTSL1 C9orf92 CNTLN SH3GL2 SAXO1 DENND4C SLC24A2 MLLT3 RRAGA HAUS6 PLIN2 RPS6 ACER2
																														92	C9_St20383553	9	20383553	20491691	3	0	0.0323077	MLLT3
																														93	C9_St20494512	9	20494512	37656212	3.66053	0	0.0171575	ANKRD18B FOCAD LINGO2 DDX58 MLLT3 ELAVL2 LOC100506422 CAAP1 IFT74 LRRC19 TEK MOB3B IFNK DNAJA1 B4GALT1 NFX1 UBAP2 UBAP1 NUDT2 DNAI1 DNAJB5 UNC13B RUSC2 RECK PAX5 ZCCHC7 POLR1E HACD4 IFNB1 IFNW1 IFNA21 IFNA4 IFNA7 IFNA10 IFNA16 IFNA17 IFNA14 IFNA5 KLHL9 IFNA6 IFNA13 IFNA2 IFNA8 IFNA1 IFNE MTAP CDKN2A CDKN2B DMRTA1 IZUMO3 TUSC1 PLAA EQTN C9orf72 ACO1 TOPORS NDUFB6 TAF1L TMEM215 APTX SMU1 SPINK4 BAG…
																														94	C9_St37671454	9	37671454	44183478	3	0	0.0323077	SHB CNTNAP3 ANKRD20A3 CNTNAP3B FRMPD1 TRMT10B EXOSC3 DCAF10 SLC25A51 ALDH1B1 IGFBPL1 ANKRD18A SPATA31A1 SPATA31A3 ZNF658 SPATA31A5 ANKRD20A2 SPATA31A6
																														95	C9_St97276901	9	97276901	97598966	3	0	0.0323077	C9orf3 FBP1 FBP2
																														96	C9_St104799620	9	104799620	105055586	3	0	0.0323077
																														97	C9_St116368580	9	116368580	116423435	3	0	0.0323077
																														98	C9_St116444695	9	116444695	116555771	3	0	0.0323077
																														99	C9_St116570711	9	116570711	117406381	3	0	0.0323077	ZNF618 COL27A1 WHRN AMBP KIF12 ORM1 ORM2 AKNA ATP6V1G1 TMEM268
																														100	C11_St63072311	11	63072311	63708574	3	0	0.0323077	SLC22A9 RARRES3 ATL3 SLC22A10 HRASLS5 LGALS12 HRASLS2 PLA2G16 RTN3 C11orf95 SPINDOC MARK2 RCOR2 NAA40
																														101	C12_St31239506	12	31239506	32514115	5	2	0.0282761	SINHCAF BICD1 DENND5B AMN1 KIAA1551 DDX11 ETFBKMT H3F3C
																														102	C13_St99592596	13	99592596	100057343	3	0	0.0323077	DOCK9 UBAC2 GPR18 GPR183
																														103	C16_St34224385	16	34224385	34862809	3	0	0.0323077
																														104	C16_St89938334	16	89938334	89942781	3	0	0.0323077	TCF25
																														105	C17_St35787667	17	35787667	35874192	5.70282	3.40564	0.040832	TADA2A DUSP14
																														106	C17_St35887393	17	35887393	36108367	6	3.97292	0.045641	SYNRG DDX52 HNF1B
																														107	C17_St36115580	17	36115580	36249565	6	4	0.046141
																														108	C17_St72107208	17	72107208	73527560	4	0.751329	0.0280006	KIF19 GRB2 TTYH2 CD300E SLC9A3R1 FADS6 JPT1 SLC25A19 LLGL2 RPL38 DNAI2 BTBD17 GPR142 GPRC5C CD300A CD300LB CD300C CD300H CD300LD C17orf77 RAB37 CD300LF NAT9 TMEM104 GRIN2C FDXR USH1G OTOP2 OTOP3 HID1 CDR2L MRPL58 ATP5PD KCTD2 SLC16A5 ARMC7 NT5C SUMO2 NUP85 GGA3 MRPS7 MIF4GD TMEM94 CASKIN2 TSEN54
																														109	C17_St73548864	17	73548864	73969835	3.65386	0.653864	0.0337271	LLGL2 RECQL5 UNK FBF1 MYO15B SMIM5 SMIM6 SAP30BP ITGB4 GALK1 H3F3B UNC13D WBP2 TRIM47 TRIM65 MRPL38 ACOX1
																														110	C17_St74589682	17	74589682	74661436	4	1	0.0344786	ST6GALNAC1
																														111	C17_St76720714	17	76720714	78236436	4.76014	1.45636	0.0241112	CYTH1 USP36 RBFOX3 TBC1D16 EIF4A3 RNF213 TIMP2 CEP295NL LGALS3BP CANT1 C1QTNF1 ENGASE ENPP7 CBX2 CBX8 CBX4 CCDC40 GAA CARD14 SGSH SLC26A11
																														112	C17_St78355177	17	78355177	78551583	5	1.92943	0.026963	RPTOR RNF213 ENDOV NPTX1
																														113	C17_St78748328	17	78748328	78757949	5	2	0.0282761	RPTOR
																														114	C17_St78761709	17	78761709	78927671	5	1.82282	0.0249793	RPTOR
																														115	C17_St78943075	17	78943075	79392089	4	1	0.0344786	BAIAP2 CEP131 TMEM105 BAHCC1 CHMP6 AATK TEPSIN NDUFAF8 SLC38A10 LOC100130370
																														116	C17_St79406557	17	79406557	79432429	4	1	0.0344786	BAHCC1
																														117	C17_St79906033	17	79906033	80090053	4	1	0.0344786	ASPSCR1 CCDC57 NOTUM CENPX LRRC45 RAC3 DCXR RFNG GPS1 DUS1L FASN
																														118	C19_St40800289	19	40800289	40800675	4	1	0.0344786
																														119	C19_St40906937	19	40906937	41299015	4	0.957052	0.0333597	SPTBN4 RAB4B PRX SERTAD1 SERTAD3 BLVRB SHKBP1 LTBP4 NUMBL COQ8B ITPKC C19orf54 SNRPA MIA
																														120	C19_St41309151	19	41309151	41379148	4	1	0.0344786	EGLN2 CYP2A6
																														121	C19_St41381215	19	41381215	41515702	4	1	0.0344786	CYP2A7 CYP2B6
																														122	C19_St42736268	19	42736268	42737136	4	1	0.0344786	GSK3A
																														123	C19_St45497578	19	45497578	45903766	4	0.993744	0.0343156	PPP1R37 RELB CLASRP ZNF296 GEMIN7 NKPD1 TRAPPC6A BLOC1S3 EXOC3L2 MARK4 CKM KLC3 ERCC2 PPP1R13L
																														124	C20_St4132665	20	4132665	4156509	3	0	0.0323077	SMOX
																														125	C20_St4416302	20	4416302	4444527	3	0	0.0323077
																														126	C20_St4952924	20	4952924	4961077	3	0	0.0323077	SLC23A2
																														127	C20_St5115037	20	5115037	5121991	3	0	0.0323077	CDS2
																														128	C20_St7897487	20	7897487	7900396	3	0	0.0323077	HAO1
																														129	C20_St8220070	20	8220070	8235815	3	0	0.0323077	PLCB1
																														130	C20_St8659243	20	8659243	8676216	3	0	0.0323077	PLCB1
																														131	C20_St9485808	20	9485808	9506705	3	0	0.0323077	LAMP5
																														132	C20_St9563714	20	9563714	9567361	3	0	0.0323077	PAK5
																														133	C20_St11347456	20	11347456	12293261	4	1	0.0344786	BTBD3
																														134	C20_St15975472	20	15975472	16023124	4	1	0.0344786	MACROD2
																														135	C20_St24052858	20	24052858	24065930	3	0	0.0323077
																														136	C20_St25966428	20	25966428	25978572	4	1	0.0344786
																														137	C20_St26309256	20	26309256	29519156	4	1	0.0344786
																														138	C20_St30066288	20	30066288	30232452	5	2	0.0282761	HM13 REM1 ID1 COX4I2
																														139	C20_St30234801	20	30234801	30324045	5	2	0.0282761	BCL2L1
																														140	C20_St31891004	20	31891004	32003944	5	2	0.0282761	CDK5RAP1 BPIFB1 SNTA1
																														141	C20_St32010852	20	32010852	32716435	5.37447	2.22477	0.0250628	CBFA2T2 ZNF341 RALY SNTA1 NECAB3 C20orf144 ACTL10 E2F1 PXMP4 CHMP4B EIF2S2
																														142	C20_St32738613	20	32738613	33667560	5.7176	2.71806	0.0276417	MYH7B AHCY ITCH PIGU TP53INP2 ASIP DYNLRB1 MAP1LC3A NCOA6 GGT7 ACSS2 GSS TRPC4AP
																														143	C20_St38305598	20	38305598	38326737	4	1	0.0344786
																														144	C20_St39426515	20	39426515	39441822	4	1	0.0344786
																														145	C20_St39662843	20	39662843	44691350	5	2	0.0282761	ZHX3 PTPRT HNF4A TOP1 LPIN3 CHD6 SGK2 MYBL2 TOX2 TTPAL ADA RIMS4 YWHAB STK4 EPPIN-WFDC6 EPPIN DNTTIP1 PCIF1 NCOA5 PLCG1 EMILIN3 SRSF6 L3MBTL1 IFT52 GTSF1L JPH2 OSER1 GDAP1L1 FITM2 R3HDML SERINC3 PKIG WISP2 KCNK15 PABPC1L TOMM34 KCNS1 WFDC5 WFDC12 PI3 SEMG1 SEMG2 SLPI MATN4 RBPJL SDC4 SYS1 TP53TG5 DBNDD2 PIGT WFDC2 SPINT3 WFDC6 WFDC8 WFDC9 WFDC10A WFDC11 WFDC10B WFDC13 SPINT4 WFDC3 UBE2C TNNC2 SNX…
																														146	C20_St45722940	20	45722940	45796660	5	2	0.0282761	EYA2
																														147	C20_St48955596	20	48955596	49113657	6	3.88063	0.043937
																														148	C22_St24341389	22	24341389	24346428	6	4	0.046141
[truncated: 9 more columns]

## Sheet: regions OS groups loss
Order	Chr_Start	Chromosome	Start	End	MB (n=9)	PS (n=10)	Pvalue	Genes		Order	Chr_Start	Chromosome	Start	End	MB (n=9)	FC (n=7)	Pvalue	Genes		Order	Chr_Start	Chromosome	Start	End	PS (n=10)	FC (n=7)	Pvalue	Genes		Order	Chr_Start	Chromosome	Start	End	MB (n=9)	not MB (n=17)	Pvalue	Genes		Order	Chr_Start	Chromosome	Start	End	PS (n=10)	not PS (n=16)	Pvalue	Genes
1	C2_St237410659	2	237410659	237533116	4	0	0.0325077	IQCA1 ACKR3		1	C4_St16485007	4	16485007	20483094	5	0	0.0336538	LDB2 NCAPG FAM184B LCORL SLIT2 QDPR CLRN2 LAP3 MED28 DCAF16		1	C5_St88752585	5	88752585	89476946	5	0	0.0441176			1	C1_St35861850	1	35861850	35871872	3	0	0.0323077	ZMYM4		1	C6_St94289685	6	94289685	95112651	3	0	0.0461538
2	C13_St19084823	13	19084823	28909835	8.99679	3.73832	0.00887466	ZDHHC20 ATP8A2 WASF3 TPTE2 PSPC1 ZMYM2 IFT88 XPO4 LATS2 MICU2 SGCG SACS TNFRSF19 MIPEP SPATA13 PARP4 RNF17 MTMR6 RNF6 CDK8 USP12 LNX2 PAN3 FLT1 TUBA3C MPHOSPH8 ZMYM5 GJA3 GJB2 GJB6 CRYL1 IL17D EEF1AKMT1 SAP18 SKA3 MRPL57 FGF9 PCOTH C1QTNF9B C1QTNF9 ATP12A CENPJ PABPC3 AMER2 NUP58 SHISA2 GPR12 RPL21 RASL11A GTF3A MTIF3 POLR1D GSX1 PDX1 CDX2 URAD FLT3		2	C4_St21441528	4	21441528	29318247	5	0	0.0336538	KCNIP4 PPARGC1A ADGRA3 CCDC149 SEL1L3 RBPJ TBC1D19 STIM2 DHX15 SOD3 LGI2 SEPSECS PI4K2B ZCCHC4 ANAPC4 SLC34A2 SMIM20 CCKAR		2	C5_St89499938	5	89499938	89693604	5	0	0.0441176	CETN3		2	C1_St243930400	1	243930400	248496237	3	0	0.0323077	KIF26B SMYD3 ZNF496 AKT3 ADSS CATSPERE DESI2 EFCAB2 CNST AHCTF1 ZNF670 ZNF124 NLRP3 GCSAML OR2L13 ZBTB18 C1orf100 COX20 HNRNPU TFB2M SCCPDH ZNF695 ZNF669 C1orf229 VN1R5 OR2B11 OR2W5 OR2C3 OR2G2 OR2G3 OR13G1 OR6F1 OR1C1 OR14A16 OR11L1 TRIM58 OR2W3 OR2T8 OR2L8 OR2AK2 OR2L5 OR2L2 OR2L3 OR2M5 OR2M2 OR2M3 OR2M4 OR2T33 OR2T12 OR2M7		2	C6_St135276697	6	135276697	135903717	3	0	0.0461538	MYB AHI1 HBS1L
3	C13_St29001722	13	29001722	29003444	9	4	0.0108359	FLT1		3	C4_St29329629	4	29329629	35532752	5	0	0.0336538	PCDH7		3	C9_St20238031	9	20238031	21995086	5.00934	0	0.0440278	FOCAD MLLT3 HACD4 IFNB1 IFNW1 IFNA21 IFNA4 IFNA7 IFNA10 IFNA16 IFNA17 IFNA14 IFNA5 KLHL9 IFNA6 IFNA13 IFNA2 IFNA8 IFNA1 IFNE MTAP CDKN2A		3	C2_St236669213	2	236669213	238143803	3.08304	0	0.0303246	AGAP1 ASB18 IQCA1 GBX2 ACKR3 COPS8		3	C6_St146284561	6	146284561	146304603	3	0	0.0461538	SHPRH
4	C13_St29006371	13	29006371	32900026	9	4	0.0108359	UBL3 FLT1 MTUS2 SLC7A1 KATNAL1 HMGB1 USPL1 ALOX5AP HSPH1 B3GLCT RXFP2 FRY BRCA2 POMP SLC46A3 MEDAG TEX26 ZAR1L		4	C4_St36603314	4	36603314	39498493	5	0	0.0336538	NWD2 C4orf19 RELL1 TBC1D1 KLF3 FAM114A1 KLHL5 WDR19 RFC1 KLB PGM2 PTTG2 TLR10 TLR1 TLR6 TMEM156 RPL9 LIAS		4	C9_St37349072	9	37349072	38355790	5	0	0.0441176	ZCCHC7 POLR1E SHB GRHPR ZBTB5 FBXO10 TOMM5 FRMPD1 TRMT10B EXOSC3 DCAF10 SLC25A51		4	C3_St3848508	3	3848508	4304493	3	0	0.0323077	LRRN1		4	C6_St151083112	6	151083112	151095379	3	0	0.0461538	PLEKHG1
5	C13_St32902709	13	32902709	32919712	9	4	0.0108359	BRCA2		5	C4_St41739561	4	41739561	47845920	5	0	0.0336538	TMEM33 GRXCR1 GABRB1 SLC30A9 ATP8A1 KCTD8 GUF1 GABRA2 COX7B2 GABRA4 ATP10D CORIN PHOX2B DCAF4L1 BEND4 SHISA3 YIPF7 GNPDA2 GABRG1 COMMD8		5	C9_St70984373	9	70984373	75108538	5	0	0.0441176	PTAR1 TRPM3 PGM5 PIP5K1B FXN TJP2 FAM189A2 APBA1 C9orf135 MAMDC2 SMC5 KLF9 CEMIP2 C9orf85 GDA ZFAND5 TMEM252 FAM122A PRKACG ABHD17B C9orf57		5	C4_St93528474	4	93528474	93542768	5	2	0.0282761	GRID2		5	C6_St161812420	6	161812420	161967901	3	0	0.0461538	PRKN
6	C13_St32921537	13	32921537	32978531	9	4	0.0108359	BRCA2 N4BP2L1		6	C4_St52684892	4	52684892	53000155	5	0	0.0336538	SPATA18 DCUN1D4 LRRC66 SGCB		6	C9_St87200557	9	87200557	89979884	5	0	0.0441176	NTRK2 AGTPBP1 NAA35 C9orf153 GOLM1 ISCA1 ZCCHC6 GAS1 C9orf170		6	C4_St142438316	4	142438316	148720579	5	1.9971	0.0282221	IL15 INPP4B ZNF827 TTC29 ARHGAP10 GAB1 SMARCA5 FREM3 HHIP ANAPC10 SMAD1 SLC10A7 USP38 GYPE GYPB GYPA ABCE1 OTUD4 MMAA C4orf51 LSM6 POU4F2 EDNRA TMEM184C PRMT9		6	C8_St5149310	8	5149310	6746641	3	0	0.0461538	MCPH1 XKR5 ANGPT2 AGPAT5 DEFB1
7	C13_St32978981	13	32978981	36080692	9	3.98798	0.0107429	NBEA N4BP2L2 PDS5B STARD13 RFC3 N4BP2L1 KL MAB21L1		7	C4_St80330744	4	80330744	90412880	5	0	0.0336538	LIN54 CFAP299 MAPK10 ABCG2 GPRIN3 ANTXR2 PRKG2 ENOPH1 SCD5 SEC31A PLAC8 WDFY3 ARHGAP24 PTPN13 AFF1 PKD2 HERC5 HERC3 FAM13A PRDM8 FGF5 BMP3 RASGEF1B HNRNPD HNRNPDL TMEM150C THAP9 COPS4 COQ2 HPSE HELQ MRPS18C ABRAXAS1 GPAT3 NKX6-1 CDS1 SLC10A6 C4orf36 KLHL8 HSD17B13 HSD17B11 NUDT9 SPARCL1 DSPP DMP1 IBSP MEPE SPP1 PPM1K HERC6 PIGY PYURF NAP1L5 TIGD2		7	C9_St90511242	9	90511242	113860776	5.22279	0	0.0419755	IPPK C9orf3 ZNF782 COL15A1 ERP44 PLPPR1 PTPN3 SVEP1 S1PR3 SHC3 SEMA4D SYK AUH ROR2 IARS CENPP OGN ECM2 WNK2 PTPDC1 FBP1 FANCC ERCC6L2 SLC35D2 HABP4 CDC14B CCDC180 TMOD1 NCBP1 CORO2A GABBR2 GALNT12 INVS MSANTD3-TMEFF1 TMEFF1 GRIN3A CYLC2 ABCA1 SLC44A1 FSD1L FKTN TMEM38B ZNF462 ELP1 TMEM245 EPB41L4B PALM2 PALM2-AKAP2 AKAP2 MUSK LPAR1 SPATA31C1 CDK20 SPATA31C2 SPIN1 NXNL2 C9orf47 CKS2 SECISBP2 GADD4…		7	C4_St151495332	4	151495332	151864962	5	2	0.0282761	LRBA MAB21L2		7	C9_St20238031	9	20238031	21995086	5.00934	1	0.0183024	FOCAD MLLT3 HACD4 IFNB1 IFNW1 IFNA21 IFNA4 IFNA7 IFNA10 IFNA16 IFNA17 IFNA14 IFNA5 KLHL9 IFNA6 IFNA13 IFNA2 IFNA8 IFNA1 IFNE MTAP CDKN2A
8	C13_St36093218	13	36093218	36410580	9	4	0.0108359	NBEA DCLK1		8	C4_St92012069	4	92012069	92715454	5	0	0.0336538	CCSER1		8	C9_St113880965	9	113880965	114170130	5	0	0.0441176	ECPAS OR2K2		8	C4_St178803424	4	178803424	178808848	5	2	0.0282761			8	C9_St37349072	9	37349072	38355790	5	1	0.0184251	ZCCHC7 POLR1E SHB GRHPR ZBTB5 FBXO10 TOMM5 FRMPD1 TRMT10B EXOSC3 DCAF10 SLC25A51
9	C13_St36443325	13	36443325	38018431	9	4.44657	0.020514	DCLK1 CCDC169-SOHLH2 CCDC169 SMAD9 SUPT20H SOHLH2 SPART CCNA1 SERTM1 RFXAP ALG5 EXOSC8 CSNK1A1L		9	C4_St92734719	4	92734719	93359846	5	0	0.0336538	GRID2		9	C9_St114174416	9	114174416	116555771	5	0	0.0441176	ZNF483 KIAA1958 ECPAS DNAJC25-GNG10 GNG10 UGCG SUSD1 PTBP3 HSDL2 INIP SNX30 SLC31A1 BSPRY RGS3 PTGR1 DNAJC25 C9orf84 SLC46A2 ZNF883 ZFP37 SLC31A2 FKBP15 CDC26 PRPF4 RNF183 WDR31 HDHD3 ALAD POLE3 C9orf43		9	C4_St181403612	4	181403612	181421891	5	2	0.0282761			9	C16_St2144575	16	2144575	2270113	3	0	0.0461538	CASKIN1 PKD1 RAB26 TRAF7 MLST8 BRICD5 PGP
10	C13_St38031236	13	38031236	38204517	9	5	0.0325077	POSTN		10	C4_St93372970	4	93372970	118929651	5	0	0.0336538	LEF1 GRID2 PDLIM5 UNC5C STPG2 BANK1 CISD2 SLC9B1 COL25A1 ALPK1 ANK2 SMARCAD1 BMPR1B RAP1GDS1 TSPAN5 ADH5 ADH6 ADH1C MTTP EMCN PPP3CA MANBA CENPE TACR3 TET2 PPA2 ARHGEF38 GSTCD NPNT TBCK DKK2 SGMS2 HADH OSTC ZCCHC23 SEC24B MCUB RRH EGF ELOVL6 ENPEP PITX2 ZGRF1 CAMK2D NDST4 ATOH1 HPGDS PDHA2 EIF4E METAP1 ADH4 ADH1A ADH1B ADH7 C4orf17 TRMT10A DAPP1 LAMTOR3 DNAJB14 H2AFZ DDIT4L SLC39A8 NFKB1 UBE2D3 S…		10	C9_St127428236	9	127428236	127494229	5	0	0.0441176	NR6A1		10	C6_St3398624	6	3398624	3996978	3	0	0.0323077	SLC22A23 PXDC1 FAM50B		10	C16_St48798871	16	48798871	50398483	3.17683	0	0.0404763	ADCY7 C16orf78 ZNF423 CNEP1R1 PAPD5 CBLN1 HEATR3 BRD7
11	C13_St38207808	13	38207808	39966162	9	4.20756	0.0153341	TRPC4 UFM1 FREM2 LHFPL6 STOML3 PROSER1 NHLRC3		11	C4_St142438316	4	142438316	148720579	5	0	0.0336538	IL15 INPP4B ZNF827 TTC29 ARHGAP10 GAB1 SMARCA5 FREM3 HHIP ANAPC10 SMAD1 SLC10A7 USP38 GYPE GYPB GYPA ABCE1 OTUD4 MMAA C4orf51 LSM6 POU4F2 EDNRA TMEM184C PRMT9		11	C9_St127512041	9	127512041	128245412	5.38063	0	0.0404578	PPP6C NR6A1 GOLGA1 SCAI GAPVD1 MAPKAP1 OLFML2A WDR38 RPL35 ARPC5L RABEPK HSPA5		11	C7_St4508103	7	4508103	28896396	3	0	0.0323077	WIPI2 CYTH3 THSD7A DGKB HDAC9 NFE2L3 RADIL MMD2 RBAK-RBAKDN TNRC18 FSCN1 RNF216 PMS2 USP42 RAC1 GRID2IP ZNF316 RSPH10B2 COL28A1 RPA3 UMAD1 GLCCI1 ICA1 NXPH1 PHF14 ETV1 AGMO ISPD ANKMY2 AGR3 SNX13 TMEM196 MACC1 ITGB8 ABCB5 SP4 DNAH11 RAPGEF5 KLHL7 IGF2BP3 FAM221A STK31 MPP6 GSDME OSBPL3 SNX10 SKAP2 HIBADH TAX1BP1 JAZF1 CREB5 FOXK1 AP5Z1 PAPOLB RBAK SLC29A4 FBXL18 ACTB OCM CCZ1 RSPH10B AIMP2 EIF2AK…		11	C16_St75220010	16	75220010	75303444	3	0	0.0461538	CTRB2 CTRB1 BCAR1
12	C15_St89238256	15	89238256	89249055	6	1	0.0197666			12	C4_St151495332	4	151495332	186322987	5	0	0.0336538	SPOCK3 SH3D19 TRIM2 DCHS2 FSTL5 MARCH1 MFAP3L GALNTL6 NEIL3 TENM3 PRIMPOL LRBA FAM160A1 FBXW7 ARFIP1 FHDC1 MND1 TMEM131L RNF175 RBM46 GUCY1A1 ASIC5 PDGFC GLRB GRIA2 RXFP1 FNIP2 C4orf45 APELA KLHL2 CPE TLL1 ANXA10 DDX60 DDX60L PALLD SH3RF1 NEK1 HPF1 GALNT7 SCRG1 CEP44 GLRA3 ADAM29 GPM6A WDR17 WWC2 STOX2 ENPP6 IRF2 ACSL1 CFAP97 SNX25 MAB21L2 RPS3A PRSS48 GATB TMEM154 TIGD4 TLR2 SFRP2 PLRG1 FGB FGA …		12	C9_St128247989	9	128247989	139556312	5.28984	0	0.0413308	TRUB2 HMCN2 TTF1 ADAMTS13 MAPKAP1 PBX3 MVB12B ZBTB34 RALGPS1 GARNL3 FAM129B STXBP1 ST6GALNAC4 CIZ1 SPTAN1 PKN3 KYAT1 NUP188 CRAT NTMT1 C9orf50 PTGES FNBP1 ABL1 LAMC3 NUP214 PRRC2B RAPGEF1 MED27 CFAP77 DDX31 AK8 TSC1 GTF3C5 SARDH VAV2 RXRA COL5A1 KCNT1 NACC2 INPP5E LMX1B ZBTB43 ANGPTL2 SLC2A8 ZNF79 RPL12 LRSAM1 CFAP157 PTRH1 TTC16 TOR2A SH2D3C CDK9 FPGS ENG AK1 ST6GALNAC6 PIP5KL1 DPM2 FAM102A NAIF…		12	C7_St66433201	7	66433201	66604541	3	0	0.0323077	SBDS TYW1		12	C17_St2322777	17	2322777	2535320	6	3	0.046141	METTL16 PAFAH1B1
13	C15_St90646940	15	90646940	90652673	6	1	0.0197666			13	C9_St68170422	9	68170422	75317874	5	0	0.0336538	CBWD6 PTAR1 TRPM3 CBWD3 PGM5 PIP5K1B FXN TJP2 FAM189A2 APBA1 C9orf135 MAMDC2 SMC5 KLF9 CEMIP2 C9orf85 GDA ZFAND5 TMC1 FOXD4L6 ANKRD20A4 FOXD4L5 FOXD4L4 CBWD5 FOXD4L3 TMEM252 FAM122A PRKACG ABHD17B C9orf57		13	C9_St139583156	9	139583156	140143668	5	0	0.0441176	RABL6 MAN1B1 FAM69B LCN10 LCN6 LCN8 LCN15 TMEM141 CCDC183 AJM1 PHPT1 MAMDC4 EDF1 TRAF2 FBXW5 C8G LCN12 PTGDS LCNL1 PAXX CLIC3 ABCA2 C9orf139 FUT7 NPDC1 ENTPD2 SAPCD2 UAP1L1 DPP7 GRIN1 LRRC26 TMEM210 ANAPC2 SSNA1 TPRN TMEM203 NDOR1 RNF208 CYSRT1 RNF224 SLC34A3 TUBB4B FAM166A		13	C7_St66649302	7	66649302	72383341	3	0	0.0323077	AUTS2 CALN1 POM121 TYW1 GALNT17 TYW1B		13	C17_St2554289	17	2554289	2793532	6	3	0.046141	RAP1GAP2 PAFAH1B1 CLUH
14	C18_St28013173	18	28013173	28037427	5	0	0.0108359			14	C9_St86363839	9	86363839	86719547	5	0	0.0336538	GKAP1 KIF27 C9orf64 HNRNPK RMI1		14	C11_St192764	11	192764	799221	5	0	0.0441176	PKP3 DEAF1 SCGB1C1 ODF3 BET1L RIC8A SIRT3 PSMD13 NLRP6 PGGHG IFITM5 IFITM2 IFITM1 IFITM3 B4GALNT4 SIGIRR ANO9 PTDSS2 RNH1 HRAS LRRC56 LMNTD2 RASSF7 PHRF1 IRF7 CDHR5 SCT DRD4 TMEM80 EPS8L2 TALDO1 GATD1 CEND1 SLC25A22 PANO1 PIDD1		14	C8_St42885356	8	42885356	43387474	3	0	0.0323077	HOOK3 FNTA POMK HGSNAT POTEA		14	C17_St2804859	17	2804859	3101691	6	3	0.046141	RAP1GAP2 OR1D5 OR1D2 OR1G1 OR1A2
15	C21_St45140617	21	45140617	45446589	0	5	0.0325077	RRP1 AGPAT3 TRAPPC10 PDXK CSTB		15	C13_St19084823	13	19084823	99579728	7.27127	0	0.00611778	PCDH9 NAA16 KPNA3 GPC5 ZDHHC20 ATP8A2 WASF3 UBL3 NBEA DCLK1 ENOX1 TSC22D1 ERICH6B LRCH1 CYSLTR2 DLEU7 DACH1 PIBF1 KLF12 FBXL3 GPC6 UGGT2 DOCK9 TPTE2 PSPC1 ZMYM2 IFT88 XPO4 LATS2 MICU2 SGCG SACS TNFRSF19 MIPEP SPATA13 PARP4 RNF17 MTMR6 RNF6 CDK8 USP12 LNX2 PAN3 FLT1 MTUS2 SLC7A1 KATNAL1 HMGB1 USPL1 ALOX5AP HSPH1 B3GLCT RXFP2 FRY BRCA2 N4BP2L2 PDS5B STARD13 RFC3 CCDC169-SOHLH2 CCDC169 SMAD9 SUPT20H…		15	C11_St805713	11	805713	3841463	5	0	0.0441176	OSBPL5 MUC5AC TOLLIP BRSK2 KCNQ1 ART1 NUP98 RPLP2 PNPLA2 CRACR2B CD151 POLR2L TSPAN4 CHID1 AP2A2 MUC6 LOC101927503 MUC2 MUC5B MOB2 DUSP8 KRTAP5-1 KRTAP5-2 KRTAP5-3 KRTAP5-5 KRTAP5-6 IFITM10 CTSD SYT8 TNNI2 LSP1 TNNT3 MRPL23 HOTS IGF2 INS-IGF2 INS TH ASCL2 C11orf21 TSPAN32 CD81 TSSC4 TRPM5 CDKN1C SLC22A18AS SLC22A18 PHLDA2 NAP1L4 CARS MRGPRG MRGPRE ZNF195 ART5 CHRNA10 PGAP2		15	C13_St19084823	13	19084823	48682354	8.41208	3.98749	0.00520548	NAA16 ZDHHC20 ATP8A2 WASF3 UBL3 NBEA DCLK1 ENOX1 TSC22D1 ERICH6B LRCH1 TPTE2 PSPC1 ZMYM2 IFT88 XPO4 LATS2 MICU2 SGCG SACS TNFRSF19 MIPEP SPATA13 PARP4 RNF17 MTMR6 RNF6 CDK8 USP12 LNX2 PAN3 FLT1 MTUS2 SLC7A1 KATNAL1 HMGB1 USPL1 ALOX5AP HSPH1 B3GLCT RXFP2 FRY BRCA2 N4BP2L2 PDS5B STARD13 RFC3 CCDC169-SOHLH2 CCDC169 SMAD9 SUPT20H POSTN TRPC4 UFM1 FREM2 LHFPL6 COG6 FOXO1 ELF1 MTRF1 VWA8 DGKH AKAP11 EP…		15	C17_St3119768	17	3119768	4328959	6	3	0.046141	UBE2G1 SPATA22 SHPK ITGAE P2RX1 ZZEF1 OR1A1 OR3A2 OR3A1 OR1E1 OR3A3 OR1E2 ASPA TRPV3 TRPV1 CTNS TAX1BP3 EMC6 P2RX5 HASPIN NCBP3 CAMKK1 ATP2A3 CYB5D2 ANKFY1
16	C21_St46580371	21	46580371	46763122	0	5	0.0325077	ADARB1 POFUT2		16	C13_St100073666	13	100073666	110397663	5.94738	0	0.0125366	NALCN FGF14 FAM155A CLYBL PCCA GGACT TMTC4 ITGBL1 TPP2 ARGLU1 MYO16 TM9SF2 ZIC5 ZIC2 METTL21C CCDC168 TEX30 KDELC1 BIVM BIVM-ERCC5 ERCC5 SLC10A2 DAOA EFNB2 LIG4 ABHD13 TNFSF13B		16	C11_St14798807	11	14798807	23523142	5	0	0.0441176	C11orf58 PDE3B SERGEF NAV2 NELL1 INSC SOX6 PLEKHA7 PIK3C2A NUCB2 ABCC8 USH1C GTF2H1 LDHAL6A IGSF22 PRMT3 ANO5 GAS2 CYP2R1 CALCA CALCB LOC102724957 RPS13 NCR3LG1 KCNJ11 OTOG MYOD1 KCNC1 TPH1 SAAL1 MRGPRX3 MRGPRX4 SAA4 SAA2-SAA4 SAA2 SAA1 HPS5 LDHA LDHC TSG101 UEVLD SPTY2D1 TMEM86A PTPN5 MRGPRX1 MRGPRX2 ZDHHC13 CSRP3 E2F8 DBX1 HTATIP2 SLC6A5 SLC17A6 FANCF SVIP CCDC179		16	C13_St48693998	13	48693998	49048715	6.23843	4	0.0383587	RB1 ITM2B LPAR6		16	C17_St5033706	17	5033706	5276643	6	3	0.046141	RABEP1 USP6 ZNF594 SCIMP
										17	C15_St33288925	15	33288925	39742977	5	0	0.0336538	SLC12A6 RASGRP1 FMN1 RYR3 AVEN CHRM5 KATNBL1 AQR DPH6 C15orf41 MEIS2 EMC7 PGBD4 EMC4 NOP10 NUTM1 LPCAT4 GOLGA8A GOLGA8B GJD2 ACTC1 ZNF770 TMCO5A SPRED1 FAM98B C15orf53		17	C13_St37315032	13	37315032	38572769	5	0	0.0441176	SMAD9 SUPT20H POSTN TRPC4 RFXAP ALG5 EXOSC8 CSNK1A1L		17	C13_St49049915	13	49049915	75072592	7.35407	4.27406	0.0159044	PCDH9 KPNA3 CYSLTR2 DLEU7 DACH1 PIBF1 KLF12 RB1 FNDC3A CAB39L SETDB2-PHF11 KCNRG RNASEH2B WDFY2 ATP7B NEK5 THSD1 HNRNPA1L2 OLFM4 DIAPH3 TDRD3 KLHL1 RCBTB2 MLNR CDADC1 SETDB2 PHF11 RCBTB1 ARL11 EBPL SPRYD7 TRIM13 FAM124A SERPINE3 INTS6 DHRS12 CCDC70 ALG11 UTP14C NEK3 VPS36 CKAP2 SUGT1 CNMD PCDH8 PRR20A PRR20B PRR20C PRR20D PRR20E PCDH17 PCDH20 MZT1 BORA DIS3 KLF5		17	C17_St5280441	17	5280441	7172631	6	3	0.046141	RABEP1 PITPNM3 MED31 FBXO39 SLC16A11 ASGR1 NUP88 RPAIN C1QBP DHX33 DERL2 MIS12 LOC728392 NLRP1 WSCD1 AIPL1 PIMREG KIAA0753 TXNDC17 C17orf100 SLC13A5 XAF1 TEKT1 ALOX12 RNASEK C17orf49 BCL6B SLC16A13 CLEC10A ASGR2 DLG4 ACADVL DVL2 PHF23 GABARAP CTDNEP1 ELP5 CLDN7
										18	C15_St40590135	15	40590135	46325986	5	0	0.0336538	KNL1 STARD9 PDIA3 CCDC9B CHST14 INO80 CHP1 NDUFAF1 RPAP1 MAPKBP1 EHD4 PLA2G4E VPS39 GANC ZNF106 HAUS2 TTBK2 UBR1 TP53BP1 STRC FRMD5 CASC4 SORD SHF PLCB2 INAFM2 PHGR1 DISP2 KNSTRN IVD BAHD1 CCDC32 RPUSD2 RAD51 RMDN3 GCHFR DNAJC17 C15orf62 ZFYVE19 PPP1R14D SPINT1 RHOV VPS18 DLL4 CHAC1 EXD1 OIP5 NUSAP1 RTF1 ITPKA LTK TYRO3 MGA JMJD7 JMJD7-PLA2G4B PLA2G4B SPTBN5 PLA2G4D PLA2G4F TMEM87A CAPN3 SNAP23 L…		18	C13_St42749607	13	42749607	43729828	5	0	0.0441176	DGKH AKAP11 EPSTI1 DNAJC15 TNFSF11 FAM216B		18	C13_St75093616	13	75093616	75574591	6	4	0.046141			18	C17_St7209387	17	7209387	7535345	6	3	0.046141	TMEM102 SENP3 EIF5A GPS2 NEURL4 ACAP1 KCTD11 TMEM95 TNK1 PLSCR3 TMEM256 NLGN2 SPEM1 SPEM2 FGF11 CHRNB1 ZBTB4 SLC35G6 POLR2A TNFSF12 TNFSF12-TNFSF13 TNFSF13 EIF4A1 CD68 LOC100996842 MPDU1 SOX15 FXR2 SHBG SAT2
										19	C15_St46328371	15	46328371	46611373	5	0	0.0336538			19	C13_St53443752	13	53443752	56227876	5	0	0.0441176	OLFM4		19	C13_St75586994	13	75586994	77547791	6	4	0.046141	TBC1D4 UCHL3 LMO7 COMMD6 LMO7DN KCTD12 ACOD1		19	C17_St7536528	17	7536528	7561459	6	3	0.046141	SHBG ATP1B2
										20	C15_St46616221	15	46616221	66576230	5.12114	0	0.0309535	ATP8B4 SECISBP2L TNFAIP8L3 GNB5 UNC13C RAB27A CGNL1 FAM81A RORA HERC1 DENND4A SEMA6D DUT FBN1 SHC4 GALK2 FAM227B GABPB1 USP8 TRPM7 AP4E1 CYP19A1 GLDN DMXL2 LYSMD2 TMOD3 MYO5C MYO5A FAM214A WDR72 C15orf65 PYGO1 PRTG NEDD4 RFX7 MNS1 ZNF280D TCF12 MYZAP GCOM1 ALDH1A2 AQP9 LIPC ADAM10 MINDY2 RNF111 MYO1E ANXA2 VPS13C TLN2 APH1B USP3 DAPK2 CSNK1G1 ZNF609 PLEKHO2 SPG21 IGDCC3 DPP8 SLC24A1 MEGF11 SLC24A…		20	C13_St62378321	13	62378321	66213496	5	0	0.0441176			20	C13_St77552610	13	77552610	77834248	6	4	0.046141	FBXL3 MYCBP2 CLN5		20	C17_St7563070	17	7563070	10989991	6	3	0.046141	MYH10 STX8 WRAP53 DNAH2 NTN1 USP43 GAS7 MYH13 MYH4 TMEM220 TP53 EFNB3 KDM6B TMEM88 NAA38 CYB5D1 CHD3 KCNAB3 TRAPPC1 CNTROB GUCY2D ALOX15B ALOX12B ALOXE3 HES7 PER1 VAMP2 TMEM107 BORCS6 AURKB CTC1 PFAS SLC25A35 RANGRF ARHGEF15 ODF4 KRBA2 RPL26 RNF222 NDEL1 CCDC42 SPDYE4 MFSD6L PIK3R6 PIK3R5 CFAP52 DHRS7C GSG1L2 GLP2R RCVRN MYH8 MYH1 MYH2 MYH3 SCO1 ADPRM PIRT
										21	C15_St67145741	15	67145741	70826268	5	0	0.0336538	SMAD3 AAGAB IQCH MAP2K5 PIAS1 ITGA11 CORO2B ANP32A NOX5 GLCE PAQR5 KIF23 TLE3 C15orf61 SKOR1 CALML4 CLN6 FEM1B SPESP1 RPLP1		21	C13_St68291993	13	68291993	68804348	5	0	0.0441176			21	C13_St77858426	13	77858426	81719429	6	4	0.046141	MYCBP2 SCEL EDNRB RBM26 NDFIP2 LOC100129307 SLAIN1 POU4F1 RNF219 SPRY2		21	C17_St11342906	17	11342906	15249734	6	3	0.046141	DNAH9 MYOCD SHISA6 MAP2K4 ARHGAP44 HS3ST3A1 COX10 ZNF18 ELAC2 CDRT15 HS3ST3B1 PMP22 TEKT3
										22	C15_St71570128	15	71570128	91195039	5.65793	0	0.0189885	C15orf39 MYO9A NEO1 ETFA PEAK1 TMED3 ARNT2 AKAP13 AGBL1 KIF7 THSD4 GRAMD2A ARIH1 BBS4 REC114 NPTN PML CCDC33 SEMA7A ARID3B EDC3 COMMD4 PTPN9 SNUPN UBE2Q2 NRG4 TMEM266 SCAPER HMG20A LINGO1 ACSBG1 IREB2 CHRNA3 MORF4L1 RASGRF1 FAH ABHD17C CEMIP IL16 TMC3 EFL1 SAXO2 CPEB1 AP3B2 WHAMM SH3GL3 ADAMTSL3 WDR73 ZNF592 SLC28A1 PDE8A NTRK3 ACAN ABHD2 C15orf38-AP3S2 ZNF710 IQGAP1 CRTC3 NR2E3 SENP8 PKM PARP6 C…		22	C13_St84781909	13	84781909	85538324	5.47077	0	0.039591			22	C13_St81741832	13	81741832	82041047	6	4	0.046141			22	C17_St15272074	17	15272074	15552588	6	3	0.046141	TVP23C-CDRT4 TVP23C CDRT4 CDRT1 TRIM16
										23	C15_St91202505	15	91202505	101869371	5.87165	0	0.0142245	ADAMTS17 BLM UNC45A SV2B SLCO3A1 FAM174B CHD2 MCTP2 IGF1R TTC23 LRRC28 MEF2A LYSMD4 CERS3 ASB7 ALDH1A3 LRRK1 PCSK6 FURIN FES MAN2A2 HDDC3 RCCD1 PRC1 VPS33B ST8SIA2 C15orf32 RGMA NR2F2 SPATA8 ARRDC4 FAM169B PGPEP1L SYNM LINS1 CHSY1 SELENOS SNRPA1		23	C13_St86213499	13	86213499	86475285	5	0	0.0441176	SLITRK6		23	C13_St82511341	13	82511341	84781908	6	4	0.046141	SLITRK1		23	C17_St15554279	17	15554279	19489796	6.04783	2.3852	0.0289509	TOM1L2 SLC5A10 ADORA2B NCOR1 PIGL CENPV LRRC75A CCDC144A MPRIP COPS3 PEMT RAI1 GID4 ALKBH5 SMCR8 B9D1 TRIM16 ZNF286A TBC1D26 ZSWIM7 TTC19 UBB TRPV2 ZNF287 ZNF624 FAM106CP TNFRSF13B PLD6 FLCN NT5M MED9 RASD1 SREBF1 DRC3 ATPAF2 DRG2 MYO15A LLGL1 FLII MIEF2 TOP3A SHMT1 EVPLL LGALS9C FAM106A TBC1D28 ZNF286B TRIM16L FBXW10 TVP23B PRPSAP2 FAM83G GRAP GRAPL LOC79999 LOC388436 EPN2 MAPK7 MFAP4 RNF112 SLC…
										24	C18_St25493637	18	25493637	25881321	5	0	0.0336538	CDH2		24	C13_St95838047	13	95838047	96485417	5	0	0.0441176	UGGT2 ABCC4 CLDN10 DNAJC3 DZIP1		24	C13_St85538325	13	85538325	85739065	6	4	0.046141			24	C17_St19497891	17	19497891	21024472	5	1	0.0184251	SPECC1 ALDH3A2 SLC47A2 ALDH3A1 ULK2 AKAP10 FAM106B LGALS9B CDRT15L2 CCDC144NL USP22
										25	C18_St25893269	18	25893269	27231371	5	0	0.0336538			25	C13_St97167802	13	97167802	98035266	5	0	0.0441176	HS6ST3 MBNL2 OXGR1		25	C13_St87423432	13	87423432	89271791	6	4	0.046141	SLITRK5		25	C17_St38518511	17	38518511	38523419	5	1	0.0184251	GJD3
										26	C18_St27237821	18	27237821	30369588	5	0	0.0336538	DSC3 DSG4 DSG2 B4GALT6 TRAPPC8 RNF125 GAREM1 KLHL14 DSC2 DSC1 DSG1 DSG3 TTR SLC25A52 RNF138 MEP1B		26	C13_St98381814	13	98381814	99507162	5	0	0.0441176	DOCK9 FARP1 RNF113B STK24 SLC15A1 IPO5		26	C13_St89275735	13	89275735	89824612	6	4	0.046141			26	C17_St39674408	17	39674408	41283377	4	0	0.0140468	EIF1 EZH1 FKBP10 TTC25 STAT5B STAT3 ATP6V0A1 TUBG1 KRT15 KRT19 KRT9 KRT14 KRT16 KRT17 GAST HAP1 JUP P3H4 NT5C3B KLHL10 KLHL11 ACLY CNP DNAJC7 NKIRAS2 ZNF385C DHX58 KAT2A HSPB9 RAB5C KCNH4 HCRT GHDC STAT5A CAVIN1 NAGLU HSD17B1 COASY MLX PSMC3IP RETREG3 TUBG2 PLEKHH3 CCR10 CNTNAP1 RAMP2 VPS25 WNK4 COA3 CNTD1 BECN1 PSME3 AOC2 AOC3 G6PC AARSD1 PTGES3L-AARSD1 PTGES3L RUNDC1 RPL27 IFI35 VAT1 RND2 BRCA1
										27	C18_St30390625	18	30390625	34934724	5	0	0.0336538	C18orf21 NOL4 KIAA1328 CCDC178 ASXL3 DTNA MAPRE2 MOCOS FHOD3 CELF4 ZNF397 ZSCAN30 ZNF24 ZNF396 INO80C GALNT1 RPRD1A SLC39A6 ELP2 TPGS2		27	C13_St110774272	13	110774272	111082058	5	0	0.0441176	COL4A2 COL4A1		27	C13_St89838728	13	89838728	90039301	6	4	0.046141			27	C17_St43319771	17	43319771	53340408	3	0	0.0461538	MAPT NFE2L1 MBTD1 MAP3K14 PLEKHM1 LINC02210-CRHR1 CRHR1 KANSL1 ARL17B NSF WNT9B CDC27 ITGB3 EFCAB13 NPEPPS KPNB1 SP2 SKAP1 CALCOCO2 NGFR SPOP FAM117A SPATA20 ABCC3 SPAG9 CA10 STXBP4 FMNL1 SPATA32 ARHGAP27 SPPL2C STH LRRC37A ARL17A LRRC37A2 WNT3 GOSR2 RPRML MYL4 TBKBP1 TBX21 OSBPL7 MRPL10 LRRC46 SCRN2 SP6 PNPO PRR15L CDK5RAP3 COPZ2 CBX1 SNX11 HOXB1 HOXB2 HOXB3 HOXB4 HOXB5 HOXB6 HOXB7 HOXB8 HOXB9 P…
										28	C18_St34944665	18	34944665	35330843	5	0	0.0336538	CELF4		28	C15_St58590649	15	58590649	59697016	5	0	0.0441176	LIPC ADAM10 MINDY2 RNF111 MYO1E SLTM CCNB2 LDHAL6B		28	C13_St90703299	13	90703299	92250454	6	4	0.046141	GPC5		28	C17_St54203361	17	54203361	54932300	3	0	0.0461538	ANKFN1 DGKE NOG C17orf67
										29	C18_St35336246	18	35336246	35465249	5	0	0.0336538			29	C17_St400959	17	400959	1278700	5	0	0.0441176	ABR VPS53 GEMIN4 NXN FAM57A GLOD4 MRM3 TIMM22 BHLHA9 TRARG1 YWHAE		29	C13_St92433958	13	92433958	95838046	6	4	0.046141	GPC5 GPC6 DCT ABCC4 TGDS GPR180 SOX21		29	C17_St54957845	17	54957845	55231043	3	0	0.0461538	AKAP1 TRIM25 COIL SCPEP1
										30	C18_St35481881	18	35481881	35606811	5	0	0.0336538			30	C17_St1294487	17	1294487	1393486	5	0	0.0441176	YWHAE CRK MYO1C		30	C13_St96485418	13	96485418	96848503	6	4	0.046141	UGGT2 HS6ST3		30	C17_St55244238	17	55244238	58361274	3	0	0.0461538	MSI2 DHX40 CUEDC1 RNF43 TEX14 PPM1E TRIM37 PRR11 YPEL2 VMP1 USP32 CCDC182 MRPS23 VEZF1 SRSF1 DYNLL2 OR4D1 OR4D2 EPX MKS1 LPO MPO TSPOAP1 SUPT4H1 HSF5 MTMR4 SEPT4 C17orf47 RAD51C SKA2 SMG8 GDPD1 CLTC PTRH2 TUBD1 RPS6KB1 RNFT1 HEATR6 CA4
										31	C18_St36008977	18	36008977	49627851	5	0	0.0336538	SLC14A2 RNF165 CTIF MAPK4 PIK3C3 RIT2 SETBP1 EPG5 PSTPIP2 C18orf25 LOXHD1 ST8SIA5 PIAS2 KATNAL2 IER3IP1 ZBTB7C DYM ACAA2 MYO5B ELAC1 SYT4 SLC14A1 SIGLEC15 ATP5F1A HAUS1 ELOA3D ELOA3B ELOA3 ELOA2 HDHD2 SKOR2 SMAD2 SMAD7 C18orf32 RPL17-C18orf32 RPL17 LIPG CFAP53 MBD1 CXXC1 SKA1 MRO ME2 SMAD4 MEX3C		31	C17_St1407898	17	1407898	4721376	5.59086	0	0.0384363	SMG6 UBE2G1 PITPNA PRPF8 SMYD4 SRR TSR1 METTL16 RAP1GAP2 SPATA22 SHPK ITGAE P2RX1 ZZEF1 MYBBP1A PELP1 PLD2 INPP5K SLC43A2 SCARF1 RILP TLCD2 WDR81 SERPINF2 SERPINF1 RPA1 RTN4RL1 DPH1 OVCA2 HIC1 SGSM2 MNT PAFAH1B1 CLUH OR1D5 OR1D2 OR1G1 OR1A2 OR1A1 OR3A2 OR3A1 OR1E1 OR3A3 OR1E2 ASPA TRPV3 TRPV1 CTNS TAX1BP3 EMC6 P2RX5 HASPIN NCBP3 CAMKK1 ATP2A3 CYB5D2 ANKFY1 SPNS3 SPNS2 GGT6 SMTNL2 ALOX15 ARRB2 MED…		31	C13_St96861981	13	96861981	97052022	6	4	0.046141	HS6ST3		31	C17_St59898707	17	59898707	61397772	3	0	0.0461538	BRIP1 MARCH10 MED13 TLK2 TANC2 INTS2 EFCAB3 METTL2A MRC2
										32	C18_St49652036	18	49652036	51183847	5	0	0.0336538	DCC		32	C17_St4742113	17	4742113	19489796	5.98842	0	0.0337092	MYH10 RABEP1 TMEM102 STX8 DNAH9 MYOCD TOM1L2 SLC5A10 PFN1 PITPNM3 MED31 FBXO39 SLC16A11 ASGR1 SENP3 WRAP53 DNAH2 NTN1 USP43 GAS7 MYH13 MYH4 TMEM220 SHISA6 MAP2K4 ARHGAP44 HS3ST3A1 COX10 TVP23C-CDRT4 TVP23C ADORA2B NCOR1 PIGL CENPV LRRC75A CCDC144A MPRIP COPS3 PEMT RAI1 GID4 ALKBH5 SMCR8 B9D1 MINK1 CHRNE C17orf107 GP1BA SLC25A11 RNF167 ENO3 SPAG7 CAMTA2 INCA1 KIF1C SLC52A1 ZFP3 ZNF232 USP6 ZNF594 …		32	C13_St97068020	13	97068020	97167801	6	4	0.046141	HS6ST3		32	C21_St39724701	21	39724701	40547004	3	0	0.0461538	ERG ETS2
										33	C18_St60857030	18	60857030	70229904	5.99889	0	0.0113884	DOK6 BCL2 VPS4B CDH7 CDH19 CCDC102B RTTN KDSR SERPINB5 SERPINB12 SERPINB13 SERPINB4 SERPINB3 SERPINB11 SERPINB7 SERPINB2 SERPINB10 HMSD SERPINB8 DSEL TMX3 CD226 SOCS6 GTSCR1 CBLN2		33	C17_St19497891	17	19497891	21024472	5	0	0.0441176	SPECC1 ALDH3A2 SLC47A2 ALDH3A1 ULK2 AKAP10 FAM106B LGALS9B CDRT15L2 CCDC144NL USP22		33	C13_St98035267	13	98035267	98373332	6	4	0.046141	MBNL2 RAP2A		33	C21_St40904749	21	40904749	47698343	3.73282	0	0.0242	DSCAM RRP1B B3GALT5 IGSF5 PCP4 BACE2 FAM3B TMPRSS2 PRDM15 UMODL1 ABCG1 RSPH1 PDE9A PKNOX1 HSF2BP RRP1 AGPAT3 TRAPPC10 PFKL TSPEAR ADARB1 COL18A1 PCBP3 MX2 MX1 RIPK4 C2CD2 ZBTB21 TFF3 TFF2 TFF1 TMPRSS3 UBASH3A SLC37A1 WDR4 NDUFV3 ERVH48-1 CBS U2AF1 CRYAA SIK1 PDXK CSTB PWP2 GATD3A ICOSLG DNMT3L AIRE C21orf2 TRPM2 LRRC3 KRTAP10-1 KRTAP10-2 KRTAP10-3 KRTAP10-4 KRTAP10-5 KRTAP10-6 KRTAP10-7 KRTAP10-8…
										34	C19_St247232	19	247232	10273372	6.07595	0	0.0126507	KANK3 ABCA7 IZUMO4 GNA15 ANKRD24 PTPRS ZNF559 ZNF559-ZNF177 RNF126 KISS1R REXO1 CSNK1G2 DOT1L GNG7 TLE2 CELF5 NFIC PIP5K1C MATK ZBTB7A STAP2 UBXN6 DPP9 PLIN3 KDM4B SAFB CATSPERD NDUFA11 RFX2 ACSBG2 KHSRP C3 VAV1 ZNF557 INSR ARHGEF18 PNPLA6 TIMM44 CCL25 HNRNPM ADAMTS10 MUC16 COL5A3 PPAN-P2RY11 P2RY11 PLPP2 MIER2 THEG C2CD4C SHC2 ODF3L2 MADCAM1 TPGS1 CDC34 GZMM BSG HCN2 POLRMT FGF22 FSTL3 PRSS57 PA…		34	C17_St37976470	17	37976470	38523419	5	0	0.0441176	IKZF3 PSMD3 WIPF2 ZPBP2 GSDMB ORMDL3 LRRC3C GSDMA CSF3 MED24 THRA NR1D1 MSL1 CASC3 RAPGEFL1 CDC6 RARA GJD3		34	C13_St100190505	13	100190505	102680226	6	4	0.046141	NALCN FGF14 CLYBL PCCA GGACT TMTC4 ITGBL1 TM9SF2 ZIC5 ZIC2
										35	C19_St10818093	19	10818093	13186524	5	0	0.0336538	CCDC151 ZNF709 DNM2 CARM1 SMARCA4 ELOF1 ZNF440 ZNF700 ZNF490 TRIR MAST1 NFIX QTRT1 TMED1 C19orf38 YIPF2 TIMM29 LDLR SPC24 KANK2 DOCK6 ANGPTL8 TSPAN16 RAB3D TMEM205 CCDC159 PLPPR2 SWSAP1 EPOR RGL3 PRKCSH ELAVL3 ZNF653 ECSIT CNN1 ACP5 ZNF627 ZNF823 ZNF441 ZNF491 ZNF439 ZNF69 ZNF763 ZNF433 ZNF878 ZNF844 ZNF788P ZNF20 ZNF625 ZNF136 ZNF44 ZNF563 ZNF442 ZNF799 ZNF443 ZNF564 ZNF791 MAN2B1 WDR83 WDR83OS …		35	C18_St48830909	18	48830909	49102389	5	0	0.0441176			35	C13_St102870611	13	102870611	103800785	6	4	0.046141	FGF14 TPP2 METTL21C CCDC168 TEX30 KDELC1 BIVM BIVM-ERCC5 ERCC5 SLC10A2
										36	C19_St13188088	19	13188088	13200721	5	0	0.0336538	NFIX		36	C19_St247232	19	247232	4597413	6.00361	0	0.0328592	ABCA7 IZUMO4 GNA15 ANKRD24 RNF126 KISS1R REXO1 CSNK1G2 DOT1L GNG7 TLE2 CELF5 NFIC PIP5K1C MATK ZBTB7A STAP2 UBXN6 PLPP2 MIER2 THEG C2CD4C SHC2 ODF3L2 MADCAM1 TPGS1 CDC34 GZMM BSG HCN2 POLRMT FGF22 FSTL3 PRSS57 PALM MISP PTBP1 PLPPR3 AZU1 PRTN3 ELANE CFD MED16 R3HDM4 ARID3A WDR18 GRIN3B TMEM259 CNN2 ARHGAP45 POLR2E GPX4 SBNO2 STK11 CBARP ATP5F1D MIDN CIRBP C19orf24 EFNA2 MUM1 NDUFS7 GAMT DAZAP1 RP…		36	C13_St103811228	13	103811228	103980230	6	4	0.046141
										37	C19_St13204836	19	13204836	13329478	5	0	0.0336538	NFIX NACC1 CACNA1A LYL1 TRMT1 STX10 IER2		37	C19_St4611616	19	4611616	4719443	5	0	0.0441176	DPP9 TNFAIP8L1 MYDGF DPP9-AS1		37	C13_St103988924	13	103988924	110180755	6	4	0.046141	FAM155A ARGLU1 MYO16 DAOA EFNB2 LIG4 ABHD13 TNFSF13B
										38	C19_St13351775	19	13351775	13712366	5	0	0.0336538	CACNA1A		38	C19_St9146473	19	9146473	9377716	5	0	0.0441176	OR1M1 OR7G2 OR7G1 OR7G3 ZNF317 OR7D2 OR7D4 OR7E24		38	C14_St43551117	14	43551117	43890733	4	1	0.0344786
										39	C19_St13730259	19	13730259	14120069	5	0	0.0336538	CC2D1A CCDC130 MRI1 C19orf53 ZSWIM4 NANOS3 C19orf57 PODNL1 DCAF15 RFX1		39	C19_St9401705	19	9401705	9531116	5	0	0.0441176	ZNF559 ZNF559-ZNF177 ZNF699 ZNF177 ZNF266		39	C14_St45209397	14	45209397	45702358	4	1	0.0344786	TOGARAM1 FANCM C14orf28 KLHL28 PRPF39 FKBP3 MIS18BP1
										40	C19_St14138213	19	14138213	14384935	5	0	0.0336538	IL27RA ADGRL1 RLN3 PALM3 MISP3 C19orf67 SAMD1 PRKACA ASF1B		40	C21_St45140617	21	45140617	45446589	5	0	0.0441176	RRP1 AGPAT3 TRAPPC10 PDXK CSTB		40	C15_St36798331	15	36798331	36818225	5	2	0.0282761
										41	C19_St14715147	19	14715147	15333785	5	0	0.0336538	ZNF333 SLC1A6 CLEC17A ADGRE3 ADGRE2 OR7C1 OR7A5 OR7A10 OR7A17 OR7C2 CCDC105 CASP14 OR1I1 SYDE1 ILVBL NOTCH3		41	C21_St46580371	21	46580371	46763122	5	0	0.0441176	ADARB1 POFUT2		41	C15_St37102853	15	37102853	37114744	5	2	0.0282761
										42	C19_St15336931	19	15336931	17882548	5	0	0.0336538	TMEM38A CYP4F8 AKAP8 CYP4F2 HSH2D EPS15L1 CHERP NWD1 CPAMD8 HAUS8 MYO9B DDA1 EPHX3 BRD4 AKAP8L WIZ RASAL3 PGLYRP2 CYP4F22 CYP4F3 CYP4F12 OR10H2 OR10H3 OR10H5 OR10H1 LINC01835 CYP4F11 OR10H4 TPM4 RAB8A CIB3 FAM32A AP1M1 KLF2 CALR3 C19orf44 SLC35E1 MED26 SMIM7 SIN3B F2RL3 USE1 OCEL1 NR2F6 USHBP1 BABAM1 ANKLE1 ABHD8 MRPL34 ANO8 GTPBP3 PLVAP BST2 MVB12A TMEM221 NXNL1 SLC27A1 PGLS FAM129C COLGALT1 UNC…												42	C15_St46936360	15	46936360	49354382	6	3.14476	0.0303504	SECISBP2L SEMA6D DUT FBN1 SHC4 SLC24A5 MYEF2 CTXN2 SLC12A1 CEP152 EID1
										43	C19_St18347871	19	18347871	18720981	5	0	0.0336538	PDE4C ELL IQCN JUND LSM4 PGPEP1 GDF15 LRRC25 SSBP4 ISYNA1 FKBP8 KXD1 UBA52 REX1BD CRLF1												43	C15_St55632860	15	55632860	55923955	5	2	0.0282761	C15orf65 PYGO1 PRTG PIGB CCPG1 DNAAF4
										44	C19_St18746523	19	18746523	19753292	5	0	0.0336538	CRTC1 GDF1 CERS1 SUGP2 MEF2B BORCS8-MEF2B SUGP1 GATAD2A KLHL26 COMP UPF1 COPE DDX49 HOMER3 ARMC6 SLC25A42 TMEM161A BORCS8 RFXANK NR2C2AP NCAN HAPLN4 TM6SF2 MAU2 TSSK6 NDUFA13 YJEFN3 CILP2 PBX4 LPAR2 GMIP												44	C15_St56290099	15	56290099	56584060	5	2	0.0282761	RFX7
										45	CX_St66902998	X	66902998	66920563	5	0	0.0336538													45	C15_St70783458	15	70783458	70826268	5	2	0.0282761
																														46	C15_St71570128	15	71570128	77617909	5.18862	2.08013	0.0259968	C15orf39 MYO9A NEO1 ETFA PEAK1 THSD4 GRAMD2A ARIH1 BBS4 REC114 NPTN PML CCDC33 SEMA7A ARID3B EDC3 COMMD4 PTPN9 SNUPN UBE2Q2 NRG4 TMEM266 SCAPER NR2E3 SENP8 PKM PARP6 CELF6 HEXA TMEM202 GOLGA6B ADPGK HCN4 CD276 C15orf59 TBC1D21 LOXL1 STOML1 GOLGA6A ISLR2 ISLR STRA6 CYP11A1 UBL7 CLK3 CYP1A1 CYP1A2 CSK LMAN1L CPLX3 ULK3 SCAMP2 MPI FAM219B COX5A RPP25 SCAMP5 PPCDC LOC105376731 GOLGA6C GOLGA6D NEIL1 M…
																														47	C15_St77622007	15	77622007	91195039	5.86724	1.99878	0.0104336	PEAK1 TMED3 ARNT2 AKAP13 AGBL1 KIF7 HMG20A LINGO1 ACSBG1 IREB2 CHRNA3 MORF4L1 RASGRF1 FAH ABHD17C CEMIP IL16 TMC3 EFL1 SAXO2 CPEB1 AP3B2 WHAMM SH3GL3 ADAMTSL3 WDR73 ZNF592 SLC28A1 PDE8A NTRK3 ACAN ABHD2 C15orf38-AP3S2 ZNF710 IQGAP1 CRTC3 TBC1D2B SH2D7 CIB2 IDH3A DNAJA4 WDR61 CRABP1 HYKK PSMA4 CHRNA5 CHRNB4 ADAMTS7 CTSH ANKRD34C KIAA1024 MTHFS ST20-MTHFS ST20 BCL2A1 ZFAND6 MESD TLNRD1 CFAP161 STAR…
																														48	C15_St91202505	15	91202505	101869371	5.87165	2	0.0103495	ADAMTS17 BLM UNC45A SV2B SLCO3A1 FAM174B CHD2 MCTP2 IGF1R TTC23 LRRC28 MEF2A LYSMD4 CERS3 ASB7 ALDH1A3 LRRK1 PCSK6 FURIN FES MAN2A2 HDDC3 RCCD1 PRC1 VPS33B ST8SIA2 C15orf32 RGMA NR2F2 SPATA8 ARRDC4 FAM169B PGPEP1L SYNM LINS1 CHSY1 SELENOS SNRPA1
																														49	C18_St25493637	18	25493637	25881321	5	2	0.0282761	CDH2
																														50	C18_St25893269	18	25893269	30369588	4.99856	1.17496	0.0130187	DSC3 DSG4 DSG2 B4GALT6 TRAPPC8 RNF125 GAREM1 KLHL14 DSC2 DSC1 DSG1 DSG3 TTR SLC25A52 RNF138 MEP1B
																														51	C18_St30390625	18	30390625	34934724	5	2	0.0282761	C18orf21 NOL4 KIAA1328 CCDC178 ASXL3 DTNA MAPRE2 MOCOS FHOD3 CELF4 ZNF397 ZSCAN30 ZNF24 ZNF396 INO80C GALNT1 RPRD1A SLC39A6 ELP2 TPGS2
																														52	C18_St34944665	18	34944665	35330843	5	2	0.0282761	CELF4
																														53	C18_St35336246	18	35336246	35465249	5	2	0.0282761
																														54	C18_St35481881	18	35481881	35606811	5	2	0.0282761
																														55	C18_St36008977	18	36008977	43718782	5	2	0.0282761	SLC14A2 PIK3C3 RIT2 SETBP1 EPG5 PSTPIP2 SYT4 SLC14A1 SIGLEC15 ATP5F1A HAUS1
																														56	C18_St60857030	18	60857030	65328953	6	4	0.046141	BCL2 VPS4B CDH7 CDH19 KDSR SERPINB5 SERPINB12 SERPINB13 SERPINB4 SERPINB3 SERPINB11 SERPINB7 SERPINB2 SERPINB10 HMSD SERPINB8 DSEL
																														57	C18_St65339349	18	65339349	70229904	6	4	0.046141	DOK6 CCDC102B RTTN TMX3 CD226 SOCS6 GTSCR1 CBLN2
																														58	C19_St4148715	19	4148715	4611615	7	4.96932	0.0367915	ANKRD24 STAP2 UBXN6 CREB3L3 SIRT6 EBI3 YJU2 SHD TMIGD2 FSD1 MPND SH3GL1 CHAF1A HDGFL2 PLIN4 PLIN5 LRG1 SEMA6B
																														59	C19_St4719444	19	4719444	9146472	6.02057	3.46005	0.0357774	KANK3 PTPRS DPP9 PLIN3 KDM4B SAFB CATSPERD NDUFA11 RFX2 ACSBG2 KHSRP C3 VAV1 ZNF557 INSR ARHGEF18 PNPLA6 TIMM44 CCL25 HNRNPM ADAMTS10 MUC16 FEM1A TICAM1 ARRDC5 UHRF1 ZNRF4 SAFB2 C19orf70 HSD11B1L RPL36 LONP1 PRR22 DUS3L NRTN FUT6 FUT3 FUT5 VMAC CAPS RANBP3 MLLT1 ACER1 CLPP ALKBH7 PSPN GTF2F1 LOC390877 SLC25A41 SLC25A23 CRB3 DENND1C TUBB4A TNFSF9 CD70 TNFSF14 GPR108 TRIP10 SH2D3A ADGRE1 MBD3L5 MBD…
																														60	C19_St9377717	19	9377717	9401704	6	4	0.046141
																														61	C19_St9531117	19	9531117	9939831	6	3.33177	0.0337857	ZNF266 ZNF560 ZNF426 ZNF121 ZNF561 ZNF562 ZNF846 FBXL12 UBL5
																														62	C19_St10165933	19	10165933	10273372	5	2	0.0282761	PPAN-P2RY11 P2RY11 C19orf66 ANGPTL6 PPAN EIF3G DNMT1
																														63	C19_St10818093	19	10818093	13186524	5	1.74955	0.0236159	CCDC151 ZNF709 DNM2 CARM1 SMARCA4 ELOF1 ZNF440 ZNF700 ZNF490 TRIR MAST1 NFIX QTRT1 TMED1 C19orf38 YIPF2 TIMM29 LDLR SPC24 KANK2 DOCK6 ANGPTL8 TSPAN16 RAB3D TMEM205 CCDC159 PLPPR2 SWSAP1 EPOR RGL3 PRKCSH ELAVL3 ZNF653 ECSIT CNN1 ACP5 ZNF627 ZNF823 ZNF441 ZNF491 ZNF439 ZNF69 ZNF763 ZNF433 ZNF878 ZNF844 ZNF788P ZNF20 ZNF625 ZNF136 ZNF44 ZNF563 ZNF442 ZNF799 ZNF443 ZNF564 ZNF791 MAN2B1 WDR83 WDR83OS …
																														64	C19_St13188088	19	13188088	13200721	5	2	0.0282761	NFIX
																														65	C19_St13204836	19	13204836	13329478	5	2	0.0282761	NFIX NACC1 CACNA1A LYL1 TRMT1 STX10 IER2
																														66	C19_St13351775	19	13351775	13712366	5	2	0.0282761	CACNA1A
																														67	C19_St13730259	19	13730259	14120069	5	1.96315	0.0275905	CC2D1A CCDC130 MRI1 C19orf53 ZSWIM4 NANOS3 C19orf57 PODNL1 DCAF15 RFX1
																														68	C19_St14138213	19	14138213	14384935	5	2	0.0282761	IL27RA ADGRL1 RLN3 PALM3 MISP3 C19orf67 SAMD1 PRKACA ASF1B
																														69	C19_St14715147	19	14715147	15333785	5	2	0.0282761	ZNF333 SLC1A6 CLEC17A ADGRE3 ADGRE2 OR7C1 OR7A5 OR7A10 OR7A17 OR7C2 CCDC105 CASP14 OR1I1 SYDE1 ILVBL NOTCH3
																														70	C19_St15336931	19	15336931	17882548	5	2	0.0282761	TMEM38A CYP4F8 AKAP8 CYP4F2 HSH2D EPS15L1 CHERP NWD1 CPAMD8 HAUS8 MYO9B DDA1 EPHX3 BRD4 AKAP8L WIZ RASAL3 PGLYRP2 CYP4F22 CYP4F3 CYP4F12 OR10H2 OR10H3 OR10H5 OR10H1 LINC01835 CYP4F11 OR10H4 TPM4 RAB8A CIB3 FAM32A AP1M1 KLF2 CALR3 C19orf44 SLC35E1 MED26 SMIM7 SIN3B F2RL3 USE1 OCEL1 NR2F6 USHBP1 BABAM1 ANKLE1 ABHD8 MRPL34 ANO8 GTPBP3 PLVAP BST2 MVB12A TMEM221 NXNL1 SLC27A1 PGLS FAM129C COLGALT1 UNC…
																														71	C19_St18347871	19	18347871	18720981	5	1.9879	0.028051	PDE4C ELL IQCN JUND LSM4 PGPEP1 GDF15 LRRC25 SSBP4 ISYNA1 FKBP8 KXD1 UBA52 REX1BD CRLF1
																														72	C19_St18746523	19	18746523	19753292	5	2	0.0282761	CRTC1 GDF1 CERS1 SUGP2 MEF2B BORCS8-MEF2B SUGP1 GATAD2A KLHL26 COMP UPF1 COPE DDX49 HOMER3 ARMC6 SLC25A42 TMEM161A BORCS8 RFXANK NR2C2AP NCAN HAPLN4 TM6SF2 MAU2 TSSK6 NDUFA13 YJEFN3 CILP2 PBX4 LPAR2 GMIP
																														73	CX_St66902998	X	66902998	66920563	5	2	0.0282761
[truncated: 9 more columns]

## Sheet: genes OS groups gain
Order	Gene	Chromosome	Start	End	MB (n=9)	PS (n=10)	Pvalue		Order	Gene	Chromosome	Start	End	MB (n=9)	FC (n=7)	Pvalue		Order	Gene	Chromosome	Start	End	PS (n=10)	FC (n=7)	Pvalue		Order	Gene	Chromosome	Start	End	MB (n=9)	not MB (n=17)	Pvalue		Order	Gene	Chromosome	Start	End	PS (n=10)	not PS (n=16)	Pvalue		Order	Gene	Chromosome	Start	End
1	GRHL2	8	102504666	102681954	9	3	0.00309598		1	PHC3	3	169805367	169899537	8	0	0.0013986		1	ASH1L	1	155305051	155532324	8	0	0.00226244		1	ANKRD18B	9	33524410	33573001	5	0	0.00191548		1	ASH1L	1	155305051	155532324	8	3	0.00398439		1	MECOM	3	168801286	169381563
2	AZIN1	8	103838529	103876428	9	3	0.00309598		2	PRKCI	3	169940219	170023770	8	0	0.0013986		2	MSTO1	1	155579960	155584758	7	0	0.00982106		2	DNAJA1	9	33025200	33039905	5	0	0.00191548		2	THBS3	1	155165378	155177772	7	2	0.00850362		2	GOLIM4	3	167726459	167813713
3	MYC	8	128748314	128753680	9	3	0.00309598		3	SAMD7	3	169629359	169656963	8	0	0.0013986		3	THBS3	1	155165378	155177772	7	0	0.00982106		3	B4GALT1	9	33110638	33167356	5	0	0.00191548		3	MTX1	1	155178489	155183630	7	2	0.00850362		3	PHC3	3	169805367	169899537
4	WISP1	8	134203281	134243933	8	2	0.00547749		4	SEC62	3	169684579	169716161	8	0	0.0013986		4	MTX1	1	155178489	155183630	7	0	0.00982106		4	NFX1	9	33290414	33348721	5	0	0.00191548		4	GBA	1	155204238	155211066	7	2	0.00850362		4	OTOL1	3	161214595	161221730
5	ASAP1	8	131064349	131455906	8	2	0.00547749		5	GPR160	3	169755734	169803184	8	0	0.0013986		5	GBA	1	155204238	155211066	7	0	0.00982106		5	SMU1	9	33041849	33076714	5	0	0.00191548		5	FAM189B	1	155216995	155225274	7	2	0.00850362		5	SI	3	164696685	164796283
6	KCNQ3	8	133133104	133459509	8	2	0.00547749		6	SKIL	3	170075472	170114637	8	0	0.0013986		6	FAM189B	1	155216995	155225274	7	0	0.00982106		6	SPINK4	9	33240161	33248565	5	0	0.00191548		6	SCAMP3	1	155225769	155232176	7	2	0.00850362		6	PRKCI	3	169940219	170023770
7	FAM135B	8	139142265	139509065	8	2	0.00547749		7	CLDN11	3	170136652	170152479	8	0	0.0013986		7	SCAMP3	1	155225769	155232176	7	0	0.00982106		7	BAG1	9	33252468	33264759	5	0	0.00191548		7	CLK2	1	155232658	155243320	7	2	0.00850362		7	SLITRK3	3	164904507	164913790
8	AGO2	8	141541263	141645646	8	2	0.00547749		8	GOLIM4	3	167726459	167813713	7	0	0.00323427		8	CLK2	1	155232658	155243320	7	0	0.00982106		8	CHMP5	9	33264876	33282067	5	0	0.00191548		8	HCN3	1	155247217	155259639	7	2	0.00850362		8	SAMD7	3	169629359	169656963
9	LRRC24	8	145747760	145752416	8	2	0.00547749		9	MECOM	3	168801286	168864093	7	0	0.00323427		9	HCN3	1	155247217	155259639	7	0	0.00982106		9	AQP7	9	33384947	33402680	5	0	0.00191548		9	PKLR	1	155259083	155270792	7	2	0.00850362		9	SEC62	3	169684579	169716161
10	C8orf82	8	145751602	145754458	8	2	0.00547749		10	TNIK	3	170776202	171178197	7	0	0.00323427		10	PKLR	1	155259083	155270792	7	0	0.00982106		10	AQP3	9	33441151	33447631	5	0	0.00191548		10	FDPS	1	155278538	155290457	7	2	0.00850362		10	GPR160	3	169755734	169803184
11	FAM49B	8	130851838	130952118	8	2	0.00547749		11	SLC7A14	3	170177341	170303863	7	0	0.00323427		11	FDPS	1	155278538	155290457	7	0	0.00982106		11	NOL6	9	33461350	33473941	5	0	0.00191548		11	RUSC1	1	155290639	155300909	7	2	0.00850362		11	SKIL	3	170075472	170114637
12	ADCY8	8	131792546	132052835	8	2	0.00547749		12	ACTRT3	3	169484708	169487683	7	0	0.00323427		12	RUSC1	1	155290639	155300909	7	0	0.00982106		12	GRHL2	8	102504666	102681954	9	6	0.00241155		12	MSTO1	1	155579960	155584758	7	3	0.0152058		12	CLDN11	3	170136652	170152479
13	OC90	8	133036466	133071627	8	2	0.00547749		13	MYNN	3	169490852	169507504	7	0	0.00323427		13	SNX27	1	151584661	151671559	6	0	0.0345023		13	AZIN1	8	103838529	103876428	9	6	0.00241155		13	SNX27	1	151584661	151671559	6	2	0.0256261		13	ASH1L	1	155305051	155532324
14	PHF20L1	8	133787603	133825439	8	2	0.00547749		14	LRRC34	3	169511215	169530574	7	0	0.00323427		14	RORC	1	151778546	151798553	6	0	0.0345023		14	MYC	8	128748314	128753680	9	6	0.00241155		14	RORC	1	151778546	151798553	6	2	0.0256261		14	ABI3BP	3	100468178	100712334
15	TG	8	133879204	134147143	8	2	0.00547749		15	LRRIQ4	3	169539709	169555561	7	0	0.00323427		15	SYT11	1	155829259	155854990	6	0	0.0345023		15	PHC3	3	169805367	169899537	8	4	0.00292906		15	CELF3	1	151672533	151688792	6	2	0.0256261		15	MED12L	3	150804584	151154465
16	SLA	8	134048972	134115310	8	2	0.00547749		16	LRRC31	3	169557028	169587723	7	0	0.00323427		16	LMNA	1	156052336	156107657	6	0	0.0345023		16	PRKCI	3	169940219	170023770	8	4	0.00292906		16	RIIAD1	1	151694012	151702082	6	2	0.0256261		16	P2RY14	3	150929904	150996230
17	ST3GAL1	8	134467090	134584183	8	2	0.00547749		17	RPL22L1	3	170582663	170588045	7	0	0.00323427		17	CELF3	1	151672533	151688792	6	0	0.0345023		17	SAMD7	3	169629359	169656963	8	4	0.00292906		17	MRPL9	1	151732118	151736392	6	2	0.0256261		17	IQCJ-SCHIP1	3	158787040	159615155
18	ZFAT	8	135490030	135708801	8	2	0.00547749		18	EIF5A2	3	170606203	170626426	7	0	0.00323427		18	RIIAD1	1	151694012	151702082	6	0	0.0345023		18	SEC62	3	169684579	169716161	8	4	0.00292906		18	OAZ3	1	151735444	151743806	6	2	0.0256261		18	SCHIP1	3	158991035	159615155
19	KHDRBS3	8	136469707	136659853	8	2	0.00547749		19	SLC2A2	3	170714136	170744768	7	0	0.00323427		19	MRPL9	1	151732118	151736392	6	0	0.0345023		19	GPR160	3	169755734	169803184	8	4	0.00292906		19	TDRKH	1	151744039	151763010	6	2	0.0256261		19	CMSS1	3	99536677	99897476
20	COL22A1	8	139600477	139926249	8	2	0.00547749		20	ABI3BP	3	100468178	100712334	6	0	0.0113636		20	OAZ3	1	151735444	151743806	6	0	0.0345023		20	SKIL	3	170075472	170114637	8	4	0.00292906		20	LINGO4	1	151772739	151777918	6	2	0.0256261		20	FILIP1L	3	99551987	99833357
21	KCNK9	8	140629363	140715299	8	2	0.00547749		21	MED12L	3	150804584	151154465	6	0	0.0113636		21	TDRKH	1	151744039	151763010	6	0	0.0345023		21	CLDN11	3	170136652	170152479	8	4	0.00292906		21	C2CD4D	1	151810338	151813033	6	2	0.0256261		21	PIK3CB	3	138371539	138426463
22	TRAPPC9	8	140739967	141467861	8	2	0.00547749		22	P2RY14	3	150929904	150996230	6	0	0.0113636		22	LINGO4	1	151772739	151777918	6	0	0.0345023		22	NCALD	8	102698769	102803439	9	7	0.00389496		22	THEM5	1	151819576	151826173	6	2	0.0256261		22	CP	3	148890285	148939832
23	PTK2	8	141668480	142011412	8	2	0.00547749		23	IQCJ-SCHIP1	3	158787040	159615155	6	0	0.0113636		23	C2CD4D	1	151810338	151813033	6	0	0.0345023		23	UBR5	8	103264500	103424917	9	7	0.00389496		23	THEM4	1	151843341	151882361	6	2	0.0256261		23	MBNL1	3	151986256	152183569
24	MROH5	8	142443928	142517330	8	2	0.00547749		24	SCHIP1	3	158991035	159615155	6	0	0.0113636		24	THEM5	1	151819576	151826173	6	0	0.0345023		24	RRM2B	8	103216728	103251059	9	7	0.00389496		24	S100A10	1	151955385	151966714	6	2	0.0256261		24	GPR149	3	154055460	154147504
25	TSNARE1	8	143293440	143484610	8	2	0.00547749		25	ARL6	3	97483364	97520086	6	0	0.0113636		25	THEM4	1	151843341	151882361	6	0	0.0345023		25	ODF1	8	103563847	103573245	9	7	0.00389496		25	S100A11	1	152004981	152009511	6	2	0.0256261		25	KCNAB1	3	155838336	156256541
26	GML	8	143916216	143928262	8	2	0.00547749		26	DCBLD2	3	98514813	98620533	6	0	0.0113636		26	S100A10	1	151955385	151966714	6	0	0.0345023		26	KLF10	8	103661004	103666192	9	7	0.00389496		26	LOC100131107	1	152051888	152053400	6	2	0.0256261		26	PQLC2L	3	157261132	157296680
27	TOP1MT	8	144391493	144442147	8	2	0.00547749		27	CMSS1	3	99536677	99897476	6	0	0.0113636		27	S100A11	1	152004981	152009511	6	0	0.0345023		27	TP53INP2	20	33292111	33301243	6	2	0.00770991		27	TCHHL1	1	152056619	152061540	6	2	0.0256261		27	TNIK	3	170776202	171178197
28	ZC3H3	8	144519824	144623620	8	2	0.00547749		28	FILIP1L	3	99551987	99833357	6	0	0.0113636		28	LOC100131107	1	152051888	152053400	6	0	0.0345023		28	NCOA6	20	33302577	33370207	6	2	0.00770991		28	TCHH	1	152078792	152087930	6	2	0.0256261		28	COL8A1	3	99357439	99515577
29	SPATC1	8	145086581	145102015	8	2	0.00547749		29	PIK3CB	3	138371539	138426463	6	0	0.0113636		29	TCHHL1	1	152056619	152061540	6	0	0.0345023		29	PTPRD	9	8314245	10612723	4	0	0.00842809		29	RPTN	1	152126070	152131704	6	2	0.0256261		29	TBC1D23	3	99979660	100044096
30	MROH1	8	145202918	145316843	8	2	0.00547749		30	CP	3	148890285	148939832	6	0	0.0113636		30	TCHH	1	152078792	152087930	6	0	0.0345023		30	LINGO2	9	27948083	29212998	4	0	0.00842809		30	HRNR	1	152184551	152196672	6	2	0.0256261		30	LNP1	3	100120036	100175170
31	CPSF1	8	145618445	145634733	8	2	0.00547749		31	MBNL1	3	151986256	152183569	6	0	0.0113636		31	RPTN	1	152126070	152131704	6	0	0.0345023		31	DDX58	9	32455299	32526322	4	0	0.00842809		31	EFNA1	1	155100348	155107386	6	2	0.0256261		31	TMEM45A	3	100211462	100296297
32	ARHGAP39	8	145754562	145911197	8	2	0.00547749		32	GPR149	3	154055460	154147504	6	0	0.0113636		32	HRNR	1	152184551	152196672	6	0	0.0345023		32	ELAVL2	9	23690101	23821478	4	0	0.00842809		32	SLC50A1	1	155107819	155111334	6	2	0.0256261		32	ADGRG7	3	100328432	100414323
33	GSDMC	8	130760441	130799134	8	2	0.00547749		33	KCNAB1	3	155838336	156256541	6	0	0.0113636		33	EFNA1	1	155100348	155107386	6	0	0.0345023		33	LOC100506422	9	26066672	26118406	4	0	0.00842809		33	DPM3	1	155112366	155112883	6	2	0.0256261		33	SENP7	3	101043032	101232085
34	EFR3A	8	132916334	133025889	8	2	0.00547749		34	PQLC2L	3	157261132	157296680	6	0	0.0113636		34	SLC50A1	1	155107819	155111334	6	0	0.0345023		34	CAAP1	9	26840682	26892826	4	0	0.00842809		34	KRTCAP2	1	155141883	155145804	6	2	0.0256261		34	CEP97	3	101443436	101489406
35	HHLA1	8	133073732	133117512	8	2	0.00547749		35	FNDC3B	3	171757417	172118493	6	0	0.0113636		35	DPM3	1	155112366	155112883	6	0	0.0345023		35	IFT74	9	26947036	27062931	4	0	0.00842809		35	TRIM46	1	155146262	155153092	6	2	0.0256261		35	CEP70	3	138213180	138313225
36	LRRC6	8	133582666	133687687	8	2	0.00547749		36	EPHA6	3	96533424	97467786	6	0	0.0113636		36	KRTCAP2	1	155141883	155145804	6	0	0.0345023		36	LRRC19	9	26993133	27005691	4	0	0.00842809		36	MUC1	1	155158299	155162706	6	2	0.0256261		36	HLTF	3	148747850	148804341
37	TMEM71	8	133722190	133772914	8	2	0.00547749		37	CRYBG3	3	97540883	97663830	6	0	0.0113636		37	TRIM46	1	155146262	155153092	6	0	0.0345023		37	TEK	9	27109138	27230176	4	0	0.00842809		37	WISP1	8	134203281	134243933	2	11	0.0414053		37	WWTR1	3	149235021	149375812
38	NDRG1	8	134249413	134309547	8	2	0.00547749		38	CPOX	3	98298289	98312455	6	0	0.0113636		38	MUC1	1	155158299	155162706	6	0	0.0345023		38	MOB3B	9	27325206	27529850	4	0	0.00842809		38	ASAP1	8	131064349	131455906	2	11	0.0414053		38	RNF13	3	149530474	149679926
39	CHRAC1	8	141521396	141527252	8	2	0.00547749		39	COL8A1	3	99357439	99515577	6	0	0.0113636		39	YY1AP1	1	155629232	155649620	6	0	0.0345023		39	UBAP2	9	33921690	34048947	4	0	0.00842809		39	KCNQ3	8	133133104	133459509	2	11	0.0414053		39	PFN2	3	149682690	149688741
40	DENND3	8	142138719	142205901	8	2	0.00547749		40	TBC1D23	3	99979660	100044096	6	0	0.0113636		40	DAP3	1	155658881	155708801	6	0	0.0345023		40	UBAP1	9	34179002	34252521	4	0	0.00842809		40	FAM135B	8	139142265	139509065	2	11	0.0414053		40	SELENOT	3	150321065	150348234
41	SLC45A4	8	142217264	142238673	8	2	0.00547749		41	LNP1	3	100120036	100175170	6	0	0.0113636		41	GON4L	1	155719448	155827086	6	0	0.0345023		41	NUDT2	9	34329503	34343711	4	0	0.00842809		41	AGO2	8	141541263	141645646	2	11	0.0414053		41	SIAH2	3	150458909	150481263
42	LOC105375787	8	142264665	142266916	8	2	0.00547749		42	TMEM45A	3	100211462	100296297	6	0	0.0113636		42	RIT1	1	155867598	155880706	6	0	0.0345023		42	DNAI1	9	34458749	34520987	4	0	0.00842809		42	LRRC24	8	145747760	145752416	2	11	0.0414053		42	ARHGEF26	3	153838791	153975616
43	GPR20	8	142366584	142377365	8	2	0.00547749		43	ADGRG7	3	100328432	100414323	6	0	0.0113636		43	KHDC4	1	155882833	155904233	6	0	0.0345023		43	IZUMO3	9	24543212	24545674	4	0	0.00842809		43	C8orf82	8	145751602	145754458	2	11	0.0414053		43	DHX36	3	153993456	154042286
44	PTP4A3	8	142431487	142442554	8	2	0.00547749		44	SENP7	3	101043032	101232085	6	0	0.0113636		44	RXFP4	1	155911479	155912625	6	0	0.0345023		44	TUSC1	9	25676386	25678856	4	0	0.00842809		44	FAM49B	8	130851838	130952118	2	11	0.0414053		44	PLCH1	3	155197670	155421997
45	ADGRB1	8	143545376	143626368	8	2	0.00547749		45	CEP97	3	101443436	101489406	6	0	0.0113636		45	ARHGEF2	1	155916629	155947966	6	0	0.0345023		45	PLAA	9	26903367	26947468	4	0	0.00842809		45	ADCY8	8	131792546	132052835	2	11	0.0414053		45	LEKR1	3	156544095	156763918
46	ARC	8	143692404	143695833	8	2	0.00547749		46	CEP70	3	138213180	138313225	6	0	0.0113636		46	SSR2	1	155978838	155990758	6	0	0.0345023		46	EQTN	9	27284651	27297137	4	0	0.00842809		46	OC90	8	133036466	133071627	2	11	0.0414053		46	VEPH1	3	156977530	157217445
47	JRK	8	143738873	143751412	8	2	0.00547749		47	HLTF	3	148747850	148804341	6	0	0.0113636		47	UBQLN4	1	156005084	156023616	6	0	0.0345023		47	C9orf72	9	27546543	27573491	4	0	0.00842809		47	PHF20L1	8	133787603	133825439	2	11	0.0414053		47	PTX3	3	157154579	157161417
48	PSCA	8	143761873	143764145	8	2	0.00547749		48	WWTR1	3	149235021	149375812	6	0	0.0113636		48	LAMTOR2	1	156024516	156028301	6	0	0.0345023		48	ACO1	9	32384600	32450834	4	0	0.00842809		48	TG	8	133879204	134147143	2	11	0.0414053		48	RSRC1	3	157827840	158262624
49	LY6K	8	143781528	143785588	8	2	0.00547749		49	RNF13	3	149530474	149679926	6	0	0.0113636		49	RAB25	1	156030939	156040305	6	0	0.0345023		49	TOPORS	9	32540541	32552626	4	0	0.00842809		49	SLA	8	134048972	134115310	2	11	0.0414053		49	IQCJ	3	158787040	158981536
50	THEM6	8	143808620	143818350	8	2	0.00547749		50	PFN2	3	149682690	149688741	6	0	0.0113636		50	MEX3A	1	156041803	156051789	6	0	0.0345023		50	NDUFB6	9	32553523	32573182	4	0	0.00842809		50	ST3GAL1	8	134467090	134584183	2	11	0.0414053		50	IFT80	3	159974773	160101554
51	SLURP1	8	143822361	143823829	8	2	0.00547749		51	SELENOT	3	150321065	150348234	6	0	0.0113636		51	SEMA4A	1	156119734	156147542	6	0	0.0345023		51	TAF1L	9	32629451	32635667	4	0	0.00842809		51	ZFAT	8	135490030	135708801	2	11	0.0414053		51	PPM1L	3	160473991	160796695
52	LYPD2	8	143831567	143833952	8	2	0.00547749		52	SIAH2	3	150458909	150481263	6	0	0.0113636		52	MECOM	3	168801286	169381563	6	0	0.0345023		52	TMEM215	9	32783496	32789199	4	0	0.00842809		52	KHDRBS3	8	136469707	136659853	2	11	0.0414053		52	NMD3	3	160939077	160969795
53	LYNX1-SLURP2	8	143845751	143859264	8	2	0.00547749		53	ARHGEF26	3	153838791	153975616	6	0	0.0113636		53	OTOL1	3	161214595	161221730	6	0	0.0345023		53	APTX	9	32972603	33001574	4	0	0.00842809		53	COL22A1	8	139600477	139926249	2	11	0.0414053		53	SPTSSB	3	161062579	161089871
54	SLURP2	8	143845755	143851246	8	2	0.00547749		54	DHX36	3	153993456	154042286	6	0	0.0113636		54	SI	3	164696685	164796283	6	0	0.0345023		54	PRSS3	9	33750463	33799229	4	0	0.00842809		54	KCNK9	8	140629363	140715299	2	11	0.0414053		54	BCHE	3	165490690	165555260
55	LYNX1	8	143852614	143858438	8	2	0.00547749		55	PLCH1	3	155197670	155421997	6	0	0.0113636		55	PLOD2	3	145787226	145879282	6	0	0.0345023		55	UBE2R2	9	33817181	33920401	4	0	0.00842809		55	TRAPPC9	8	140739967	141467861	2	11	0.0414053		55	ZBBX	3	166958074	167098071
56	LY6D	8	143866297	143868008	8	2	0.00547749		56	LEKR1	3	156544095	156763918	6	0	0.0113636		56	SLITRK3	3	164904507	164913790	6	0	0.0345023		56	DCAF12	9	34086380	34126771	4	0	0.00842809		56	PTK2	8	141668480	142011412	2	11	0.0414053		56	WDR49	3	167196471	167371289
57	CYP11B1	8	143953772	143961236	8	2	0.00547749		57	VEPH1	3	156977530	157217445	6	0	0.0113636		57	CABIN1	22	24407764	24574596	6	0	0.0345023		57	KIF24	9	34252377	34329198	4	0	0.00842809		57	MROH5	8	142443928	142517330	2	11	0.0414053		57	SERPINI1	3	167453431	167543357
58	CYP11B2	8	143991974	143999259	8	2	0.00547749		58	PTX3	3	157154579	157161417	6	0	0.0113636		58	LIN9	1	226418849	226497204	5	0	0.0441176		58	MYORG	9	34366663	34376894	4	0	0.00842809		58	TSNARE1	8	143293440	143484610	2	11	0.0414053		58	SLC7A14	3	170177341	170303863
59	LY6E	8	144099901	144103827	8	2	0.00547749		59	RSRC1	3	157827840	158262624	6	0	0.0113636		59	SMG5	1	156219014	156252620	5	0	0.0441176		59	C9orf24	9	34379016	34381598	4	0	0.00842809		59	GML	8	143916216	143928262	2	11	0.0414053		59	NIT2	3	100053561	100074478
60	LY6H	8	144239330	144241457	8	2	0.00547749		60	IQCJ	3	158787040	158981536	6	0	0.0113636		60	DNAH14	1	225117355	225586996	5	0	0.0441176		60	FAM219A	9	34398181	34458568	4	0	0.00842809		60	TOP1MT	8	144391493	144442147	2	11	0.0414053		60	TOMM70	3	100082302	100120242
61	GPIHBP1	8	144295067	144299044	8	2	0.00547749		61	IFT80	3	159974773	160101554	6	0	0.0113636		61	TRIM11	1	228581376	228594517	5	0	0.0441176		61	ENHO	9	34521039	34523037	4	0	0.00842809		61	ZC3H3	8	144519824	144623620	2	11	0.0414053		61	TFG	3	100428133	100467811
62	ZFP41	8	144328990	144335761	8	2	0.00547749		62	PPM1L	3	160473991	160796695	6	0	0.0113636		62	NUP133	1	229577043	229644088	5	0	0.0441176		62	CNTFR	9	34551429	34589735	4	0	0.00842809		62	SPATC1	8	145086581	145102015	2	11	0.0414053		62	IMPG2	3	100941389	101039419
63	GLI4	8	144349606	144359101	8	2	0.00547749		63	NMD3	3	160939077	160969795	6	0	0.0113636		63	LYST	1	235824330	236030227	5	0	0.0441176		63	GRB2	17	73314156	73401789	4	0	0.00842809		63	MROH1	8	145202918	145316843	2	11	0.0414053		63	TRMT10C	3	101280679	101285290
64	ZNF696	8	144373558	144382122	8	2	0.00547749		64	SPTSSB	3	161062579	161089871	6	0	0.0113636		64	MTR	1	236958580	237067281	5	0	0.0441176		64	SLC25A19	17	73269060	73285530	4	0	0.00842809		64	CPSF1	8	145618445	145634733	2	11	0.0414053		64	PCNP	3	101292937	101313309
65	RHPN1	8	144451024	144466390	8	2	0.00547749		65	OTOL1	3	161214595	161221730	6	0	0.0113636		65	RGS7	1	240938813	241520530	5	0	0.0441176		65	SUMO2	17	73163824	73179098	4	0	0.00842809		65	ARHGAP39	8	145754562	145911197	2	11	0.0414053		65	ZBTB11	3	101368282	101395988
66	MAFA	8	144510229	144512602	8	2	0.00547749		66	SI	3	164696685	164796283	6	0	0.0113636		66	KIF26B	1	245318286	245866428	5	0	0.0441176		66	NUP85	17	73201530	73231854	4	0	0.00842809		66	GSDMC	8	130760441	130799134	2	11	0.0414053		66	RPL24	3	101399933	101405563
67	GSDMD	8	144635556	144645232	8	2	0.00547749		67	BCHE	3	165490690	165555260	6	0	0.0113636		67	SMYD3	1	245912641	246580714	5	0	0.0441176		67	GGA3	17	73232686	73257742	4	0	0.00842809		67	EFR3A	8	132916334	133025889	2	11	0.0414053		67	NXPE3	3	101498028	101547075
68	MROH6	8	144648361	144654928	8	2	0.00547749		68	ZBBX	3	166958074	167098071	6	0	0.0113636		68	ZNF496	1	247460714	247495242	5	0	0.0441176		68	MRPS7	17	73257748	73262457	4	0	0.00842809		68	HHLA1	8	133073732	133117512	2	11	0.0414053		68	NFKBIZ	3	101546833	101579869
69	NAPRT	8	144656954	144660521	8	2	0.00547749		69	WDR49	3	167196471	167371289	6	0	0.0113636		69	OR14C36	1	248512076	248513015	5	0	0.0441176		69	MIF4GD	17	73262308	73267311	4	0	0.00842809		69	LRRC6	8	133582666	133687687	2	11	0.0414053		69	ZPLD1	3	102153858	102198685
70	EEF1D	8	144661891	144679583	8	2	0.00547749		70	SERPINI1	3	167453431	167543357	6	0	0.0113636		70	TUFT1	1	151512780	151556059	5	0	0.0441176		70	RPTOR	17	78518624	78940173	5	1	0.00966859		70	TMEM71	8	133722190	133772914	2	11	0.0414053		70	FAIM	3	138327541	138352218
71	TIGD5	8	144680073	144682485	8	2	0.00547749		71	PLD1	3	171318194	171528284	6	0	0.0113636		71	PBXIP1	1	154916555	154928639	5	0	0.0441176		71	RBFOX3	17	77085426	77512230	5	1	0.00966859		71	NDRG1	8	134249413	134309547	2	11	0.0414053		71	PLOD2	3	145787226	145879282
72	PYCR3	8	144685393	144691784	8	2	0.00547749		72	TMEM212	3	171561138	171577108	6	0	0.0113636		72	EFNA3	1	155051347	155060014	5	0	0.0441176		72	ENGASE	17	77071018	77084685	5	1	0.00966859		72	CHRAC1	8	141521396	141527252	2	11	0.0414053		72	GYG1	3	148709194	148745456
73	TSTA3	8	144694787	144699649	8	2	0.00547749		73	TNFSF10	3	172223297	172241297	6	0	0.0113636		73	CNIH3	1	224622596	224928251	5	0	0.0441176		73	WISP1	8	134203281	134243933	8	5	0.011167		73	DENND3	8	142138719	142205901	2	11	0.0414053		73	HPS3	3	148847370	148890983
74	ZNF623	8	144718182	144735900	8	2	0.00547749		74	NCEH1	3	172348434	172429008	6	0	0.0113636		74	ENAH	1	225674530	225840845	5	0	0.0441176		74	ASAP1	8	131064349	131455906	8	5	0.011167		74	SLC45A4	8	142217264	142238673	2	11	0.0414053		74	TM4SF18	3	149036284	149051259
75	ZNF707	8	144766621	144777555	8	2	0.00547749		75	ECT2	3	172468474	172539264	6	0	0.0113636		75	SRP9	1	225965514	225978168	5	0	0.0441176		75	KCNQ3	8	133133104	133459509	8	5	0.011167		75	LOC105375787	8	142264665	142266916	2	11	0.0414053		75	TM4SF1	3	149086804	149095568
76	CCDC166	8	144788863	144790279	8	2	0.00547749		76	SPATA16	3	172607146	172859058	6	0	0.0113636		76	ACBD3	1	226332379	226374423	5	0	0.0441176		76	FAM135B	8	139142265	139509065	8	5	0.011167		76	GPR20	8	142366584	142377365	2	11	0.0414053		76	TM4SF4	3	149192367	149221181
77	MAPK15	8	144798506	144804633	8	2	0.00547749		77	LPP	3	187871660	188608460	6	0	0.0113636		77	STUM	1	226736500	226796915	5	0	0.0441176		77	AGO2	8	141541263	141645646	8	5	0.011167		77	PTP4A3	8	142431487	142442554	2	11	0.0414053		77	COMMD2	3	149456256	149470286
78	FAM83H	8	144806102	144815914	8	2	0.00547749		78	HES1	3	193853930	193856401	6	0	0.0113636		78	ITPKB	1	226819390	226926876	5	0	0.0441176		78	LRRC24	8	145747760	145752416	8	5	0.011167		78	ADGRB1	8	143545376	143626368	2	11	0.0414053		78	ANKUB1	3	149479225	149510610
79	SCRIB	8	144873089	144897549	8	2	0.00547749		79	GP5	3	194115549	194119995	6	0	0.0113636		79	COQ8A	1	227127937	227175246	5	0	0.0441176		79	C8orf82	8	145751602	145754458	8	5	0.011167		79	ARC	8	143692404	143695833	2	11	0.0414053		79	TMEM183B	3	149699447	149701153
80	PUF60	8	144898513	144911279	8	2	0.00547749		80	RIOX2	3	97660660	97691295	6	0	0.0113636		80	CDC42BPA	1	227177565	227505826	5	0	0.0441176		80	FAM49B	8	130851838	130952118	8	5	0.011167		80	JRK	8	143738873	143751412	2	11	0.0414053		80	TSC22D2	3	150126121	150177906
81	NRBP2	8	144915754	144923146	8	2	0.00547749		81	GABRR3	3	97705526	97754148	6	0	0.0113636		81	ZNF678	1	227751219	227850164	5	0	0.0441176		81	ADCY8	8	131792546	132052835	8	5	0.011167		81	PSCA	8	143761873	143764145	2	11	0.0414053		81	SERP1	3	150259779	150264428
82	EPPK1	8	144939491	144952632	8	2	0.00547749		82	OR5AC2	3	97806016	97806946	6	0	0.0113636		82	SNAP47	1	227915868	227968932	5	0	0.0441176		82	OC90	8	133036466	133071627	8	5	0.011167		82	LY6K	8	143781528	143785588	2	11	0.0414053		82	EIF2A	3	150264464	150303803
83	PLEC	8	144989314	145050913	8	2	0.00547749		83	OR5H1	3	97851541	97852483	6	0	0.0113636		83	WNT3A	1	228194722	228248972	5	0	0.0441176		83	PHF20L1	8	133787603	133825439	8	5	0.011167		83	THEM6	8	143808620	143818350	2	11	0.0414053		83	ERICH6	3	150377671	150421758
84	PARP10	8	145051319	145060639	8	2	0.00547749		84	OR5H14	3	97868229	97869162	6	0	0.0113636		84	URB2	1	229761962	229795947	5	0	0.0441176		84	TG	8	133879204	134147143	8	5	0.011167		84	SLURP1	8	143822361	143823829	2	11	0.0414053		84	CLRN1	3	150643949	150662023
85	GRINA	8	145064225	145067583	8	2	0.00547749		85	OR5H15	3	97887543	97888485	6	0	0.0113636		85	GALNT2	1	230193535	230417876	5	0	0.0441176		85	SLA	8	134048972	134115310	8	5	0.011167		85	LYPD2	8	143831567	143833952	2	11	0.0414053		85	GPR171	3	150915618	150920988
86	OPLAH	8	145106166	145115606	8	2	0.00547749		86	OR5H6	3	97983128	97984106	6	0	0.0113636		86	PGBD5	1	230457391	230561674	5	0	0.0441176		86	ST3GAL1	8	134467090	134584183	8	5	0.011167		86	LYNX1-SLURP2	8	143845751	143859264	2	11	0.0414053		86	GPR87	3	151011873	151034636
87	EXOSC4	8	145133521	145135551	8	2	0.00547749		87	OR5H2	3	98001731	98002676	6	0	0.0113636		87	COG2	1	230778201	230829731	5	0	0.0441176		87	ZFAT	8	135490030	135708801	8	5	0.011167		87	SLURP2	8	143845755	143851246	2	11	0.0414053		87	P2RY13	3	151044095	151047337
88	GPAA1	8	145137523	145141119	8	2	0.00547749		88	OR5K4	3	98072697	98073663	6	0	0.0113636		88	TTC13	1	231041986	231114618	5	0	0.0441176		88	KHDRBS3	8	136469707	136659853	8	5	0.011167		88	LYNX1	8	143852614	143858438	2	11	0.0414053		88	P2RY12	3	151054630	151058643
89	CYC1	8	145149937	145152430	8	2	0.00547749		89	OR5K3	3	98109509	98110475	6	0	0.0113636		89	TRIM67	1	231298673	231357314	5	0	0.0441176		89	COL22A1	8	139600477	139926249	8	5	0.011167		89	LY6D	8	143866297	143868008	2	11	0.0414053		89	IGSF10	3	151153777	151158578
90	SHARPIN	8	145153535	145159140	8	2	0.00547749		90	OR5K1	3	98188323	98189420	6	0	0.0113636		90	EXOC8	1	231468476	231473618	5	0	0.0441176		90	KCNK9	8	140629363	140715299	8	5	0.011167		90	CYP11B1	8	143953772	143961236	2	11	0.0414053		90	AADACL2	3	151451703	151475556
91	MAF1	8	145159304	145162515	8	2	0.00547749		91	OR5K2	3	98216524	98217475	6	0	0.0113636		91	DISC1	1	231762560	232177018	5	0	0.0441176		91	TRAPPC9	8	140739967	141467861	8	5	0.011167		91	CYP11B2	8	143991974	143999259	2	11	0.0414053		91	AADAC	3	151531860	151546276
92	WDR97	8	145162594	145171286	8	2	0.00547749		92	CLDND1	3	98234316	98241910	6	0	0.0113636		92	PCNX2	1	233119881	233431459	5	0	0.0441176		92	PTK2	8	141668480	142011412	8	5	0.011167		92	LY6E	8	144099901	144103827	2	11	0.0414053		92	SUCNR1	3	151591430	151602407
93	HGH1	8	145192671	145195746	8	2	0.00547749		93	GPR15	3	98250742	98253523	6	0	0.0113636		93	SLC35F3	1	234040457	234460264	5	0	0.0441176		93	MROH5	8	142443928	142517330	8	5	0.011167		93	LY6H	8	144239330	144241457	2	11	0.0414053		93	P2RY1	3	152552481	152559228
94	BOP1	8	145316948	145331185	8	2	0.00547749		94	ST3GAL6	3	98451079	98514689	6	0	0.0113636		94	TOMM20	1	235272655	235292256	5	0	0.0441176		94	TSNARE1	8	143293440	143484610	8	5	0.011167		94	GPIHBP1	8	144295067	144299044	2	11	0.0414053		94	RAP2B	3	152880000	152888413
95	SCX	8	145321460	145323386	8	2	0.00547749		95	NIT2	3	100053561	100074478	6	0	0.0113636		95	ARID4B	1	235330209	235490802	5	0	0.0441176		95	GML	8	143916216	143928262	8	5	0.011167		95	ZFP41	8	144328990	144335761	2	11	0.0414053		95	C3orf79	3	153202283	153220486
96	HSF1	8	145515250	145538389	8	2	0.00547749		96	TOMM70	3	100082302	100120242	6	0	0.0113636		96	TBCE	1	235530674	235612283	5	0	0.0441176		96	TOP1MT	8	144391493	144442147	8	5	0.011167		96	GLI4	8	144349606	144359101	2	11	0.0414053		96	MME	3	154797435	154901518
97	DGAT1	8	145538245	145550582	8	2	0.00547749		97	TFG	3	100428133	100467811	6	0	0.0113636		97	B3GALNT2	1	235610504	235667781	5	0	0.0441176		97	ZC3H3	8	144519824	144623620	8	5	0.011167		97	ZNF696	8	144373558	144382122	2	11	0.0414053		97	C3orf33	3	155480400	155524076
98	SCRT1	8	145554227	145559943	8	2	0.00547749		98	IMPG2	3	100941389	101039419	6	0	0.0113636		98	GNG4	1	235710984	235813293	5	0	0.0441176		98	SPATC1	8	145086581	145102015	8	5	0.011167		98	RHPN1	8	144451024	144466390	2	11	0.0414053		98	SLC33A1	3	155544299	155572248
99	TMEM249	8	145576885	145578591	8	2	0.00547749		99	TRMT10C	3	101280679	101285290	6	0	0.0113636		99	NID1	1	236139129	236228481	5	0	0.0441176		99	MROH1	8	145202918	145316843	8	5	0.011167		99	MAFA	8	144510229	144512602	2	11	0.0414053		99	GMPS	3	155588324	155655521
100	FBXL6	8	145579087	145582183	8	2	0.00547749		100	PCNP	3	101292937	101313309	6	0	0.0113636		100	GPR137B	1	236305831	236372209	5	0	0.0441176		100	CPSF1	8	145618445	145634733	8	5	0.011167		100	GSDMD	8	144635556	144645232	2	11	0.0414053		100	SSR3	3	156257341	156271914
101	SLC52A2	8	145582216	145584946	8	2	0.00547749		101	ZBTB11	3	101368282	101395988	6	0	0.0113636		101	EDARADD	1	236557679	236648008	5	0	0.0441176		101	ARHGAP39	8	145754562	145911197	8	5	0.011167		101	MROH6	8	144648361	144654928	2	11	0.0414053		101	TIPARP	3	156392204	156424559
102	ADCK5	8	145597703	145618457	8	2	0.00547749		102	RPL24	3	101399933	101405563	6	0	0.0113636		102	LGALS8	1	236681513	236716281	5	0	0.0441176		102	GSDMC	8	130760441	130799134	8	5	0.011167		102	NAPRT	8	144656954	144660521	2	11	0.0414053		102	CCNL1	3	156864290	156878549
103	SLC39A4	8	145637797	145638975	8	2	0.00547749		103	NXPE3	3	101498028	101547075	6	0	0.0113636		103	HEATR1	1	236712304	236767841	5	0	0.0441176		103	EFR3A	8	132916334	133025889	8	5	0.011167		103	EEF1D	8	144661891	144679583	2	11	0.0414053		103	SHOX2	3	157813799	157823952
104	VPS28	8	145648983	145653946	8	2	0.00547749		104	NFKBIZ	3	101546833	101579869	6	0	0.0113636		104	RYR2	1	237205701	237997288	5	0	0.0441176		104	HHLA1	8	133073732	133117512	8	5	0.011167		104	TIGD5	8	144680073	144682485	2	11	0.0414053		104	MLF1	3	158288952	158324249
105	TONSL	8	145654162	145669812	8	2	0.00547749		105	ZPLD1	3	102153858	102198685	6	0	0.0113636		105	CHRM3	1	239550229	240078750	5	0	0.0441176		105	LRRC6	8	133582666	133687687	8	5	0.011167		105	PYCR3	8	144685393	144691784	2	11	0.0414053		105	GFM1	3	158362316	158410361
106	CYHR1	8	145674964	145688234	8	2	0.00547749		106	FAIM	3	138327541	138352218	6	0	0.0113636		106	FMN2	1	240255184	240638489	5	0	0.0441176		106	TMEM71	8	133722190	133772914	8	5	0.011167		106	TSTA3	8	144694787	144699649	2	11	0.0414053		106	LXN	3	158384202	158390482
107	KIFC2	8	145691719	145699499	8	2	0.00547749		107	GYG1	3	148709194	148745456	6	0	0.0113636		107	KMO	1	241695433	241758949	5	0	0.0441176		107	NDRG1	8	134249413	134309547	8	5	0.011167		107	ZNF623	8	144718182	144735900	2	11	0.0414053		107	RARRES1	3	158414896	158450275
108	FOXH1	8	145699114	145701718	8	2	0.00547749		108	HPS3	3	148847370	148890983	6	0	0.0113636		108	WDR64	1	241815579	241965435	5	0	0.0441176		108	CHRAC1	8	141521396	141527252	8	5	0.011167		108	ZNF707	8	144766621	144777555	2	11	0.0414053		108	MFSD1	3	158519714	158547508
109	PPP1R16A	8	145703364	145727504	8	2	0.00547749		109	TM4SF18	3	149036284	149051259	6	0	0.0113636		109	PLD5	1	242251688	242612784	5	0	0.0441176		109	DENND3	8	142138719	142205901	8	5	0.011167		109	CCDC166	8	144788863	144790279	2	11	0.0414053		109	IL12A	3	159706622	159713806
110	GPT	8	145729464	145732555	8	2	0.00547749		110	TM4SF1	3	149086804	149095568	6	0	0.0113636		110	CEP170	1	243287729	243418708	5	0	0.0441176		110	SLC45A4	8	142217264	142238673	8	5	0.011167		110	MAPK15	8	144798506	144804633	2	11	0.0414053		110	C3orf80	3	159943422	159946000
111	MFSD3	8	145734418	145736611	8	2	0.00547749		111	TM4SF4	3	149192367	149221181	6	0	0.0113636		111	SDCCAG8	1	243419306	243663393	5	0	0.0441176		111	LOC105375787	8	142264665	142266916	8	5	0.011167		111	FAM83H	8	144806102	144815914	2	11	0.0414053		111	SMC4	3	160117091	160152750
112	RECQL4	8	145736666	145743210	8	2	0.00547749		112	COMMD2	3	149456256	149470286	6	0	0.0113636		112	AKT3	1	243651534	244006584	5	0	0.0441176		112	GPR20	8	142366584	142377365	8	5	0.011167		112	SCRIB	8	144873089	144897549	2	11	0.0414053		112	TRIM59	3	160153290	160167626
113	LRRC14	8	145743348	145750562	8	2	0.00547749		113	ANKUB1	3	149479225	149510610	6	0	0.0113636		113	ADSS	1	244571793	244615436	5	0	0.0441176		113	PTP4A3	8	142431487	142442554	8	5	0.011167		113	PUF60	8	144898513	144911279	2	11	0.0414053		113	KPNA4	3	160212782	160283376
114	ZNF251	8	145946293	145980970	8	2	0.00547749		114	TMEM183B	3	149699447	149701153	6	0	0.0113636		114	CATSPERE	1	244624672	244803662	5	0	0.0441176		114	ADGRB1	8	143545376	143626368	8	5	0.011167		114	NRBP2	8	144915754	144923146	2	11	0.0414053		114	ARL14	3	160394947	160396236
115	ZNF34	8	145997608	146012730	8	2	0.00547749		115	TSC22D2	3	150126121	150177906	6	0	0.0113636		115	DESI2	1	244816349	244872336	5	0	0.0441176		115	ARC	8	143692404	143695833	8	5	0.011167		115	EPPK1	8	144939491	144952632	2	11	0.0414053		115	B3GALNT1	3	160801670	160822683
116	RPL8	8	146015149	146017774	8	2	0.00547749		116	SERP1	3	150259779	150264428	6	0	0.0113636		116	EFCAB2	1	245133170	245251148	5	0	0.0441176		116	JRK	8	143738873	143751412	8	5	0.011167		116	PLEC	8	144989314	145050913	2	11	0.0414053		116	SERPINI2	3	167159576	167191920
117	ZNF517	8	146024260	146034529	8	2	0.00547749		117	EIF2A	3	150264464	150303803	6	0	0.0113636		117	CNST	1	246729638	246811544	5	0	0.0441176		117	PSCA	8	143761873	143764145	8	5	0.011167		117	PARP10	8	145051319	145060639	2	11	0.0414053		117	PDCD10	3	167401693	167452594
118	ZNF7	8	146052902	146068607	8	2	0.00547749		118	ERICH6	3	150377671	150421758	6	0	0.0113636		118	AHCTF1	1	247002399	247094726	5	0	0.0441176		118	LY6K	8	143781528	143785588	8	5	0.011167		118	GRINA	8	145064225	145067583	2	11	0.0414053		118	ACTRT3	3	169484708	169487683
119	COMMD5	8	146075550	146078452	8	2	0.00547749		119	CLRN1	3	150643949	150662023	6	0	0.0113636		119	ZNF670	1	247197939	247242115	5	0	0.0441176		119	THEM6	8	143808620	143818350	8	5	0.011167		119	OPLAH	8	145106166	145115606	2	11	0.0414053		119	MYNN	3	169490852	169507504
120	ZNF250	8	146102335	146126846	8	2	0.00547749		120	GPR171	3	150915618	150920988	6	0	0.0113636		120	ZNF124	1	247285276	247335319	5	0	0.0441176		120	SLURP1	8	143822361	143823829	8	5	0.011167		120	EXOSC4	8	145133521	145135551	2	11	0.0414053		120	LRRC34	3	169511215	169530574
121	ZNF16	8	146155743	146176274	8	2	0.00547749		121	GPR87	3	151011873	151034636	6	0	0.0113636		121	NLRP3	1	247579457	247612410	5	0	0.0441176		121	LYPD2	8	143831567	143833952	8	5	0.011167		121	GPAA1	8	145137523	145141119	2	11	0.0414053		121	LRRIQ4	3	169539709	169555561
122	C8orf33	8	146277823	146281416	8	2	0.00547749		122	P2RY13	3	151044095	151047337	6	0	0.0113636		122	GCSAML	1	247670359	247740992	5	0	0.0441176		122	LYNX1-SLURP2	8	143845751	143859264	8	5	0.011167		122	CYC1	8	145149937	145152430	2	11	0.0414053		122	LRRC31	3	169557028	169587723
123	ANKRD18B	9	33524410	33573001	5	0	0.0108359		123	P2RY12	3	151054630	151058643	6	0	0.0113636		123	OR2L13	1	248100330	248264224	5	0	0.0441176		123	SLURP2	8	143845755	143851246	8	5	0.011167		123	SHARPIN	8	145153535	145159140	2	11	0.0414053		123	RPL22L1	3	170582663	170588045
124	DNAJA1	9	33025200	33039905	5	0	0.0108359		124	IGSF10	3	151153777	151158578	6	0	0.0113636		124	CGN	1	151483861	151511168	5	0	0.0441176		124	LYNX1	8	143852614	143858438	8	5	0.011167		124	MAF1	8	145159304	145162515	2	11	0.0414053		124	EIF5A2	3	170606203	170626426
125	B4GALT1	9	33110638	33167356	5	0	0.0108359		125	AADACL2	3	151451703	151475556	6	0	0.0113636		125	FLG	1	152274650	152297679	5	0	0.0441176		125	LY6D	8	143866297	143868008	8	5	0.011167		125	WDR97	8	145162594	145171286	2	11	0.0414053		125	SLC2A2	3	170714136	170744768
126	NFX1	9	33290414	33348721	5	0	0.0108359		126	AADAC	3	151531860	151546276	6	0	0.0113636		126	FLG2	1	152321212	152332482	5	0	0.0441176		126	CYP11B1	8	143953772	143961236	8	5	0.011167		126	HGH1	8	145192671	145195746	2	11	0.0414053		126	MSTO1	1	155579960	155584758
127	SMU1	9	33041849	33076714	5	0	0.0108359		127	SUCNR1	3	151591430	151602407	6	0	0.0113636		127	CRNN	1	152381718	152386750	5	0	0.0441176		127	CYP11B2	8	143991974	143999259	8	5	0.011167		127	BOP1	8	145316948	145331185	2	11	0.0414053		127	SYT11	1	155829259	155854990
128	SPINK4	9	33240161	33248565	5	0	0.0108359		128	P2RY1	3	152552481	152559228	6	0	0.0113636		128	PMVK	1	154897207	154908938	5	0	0.0441176		128	LY6E	8	144099901	144103827	8	5	0.011167		128	SCX	8	145321460	145323386	2	11	0.0414053		128	LMNA	1	156052336	156107657
129	BAG1	9	33252468	33264759	5	0	0.0108359		129	RAP2B	3	152880000	152888413	6	0	0.0113636		129	PYGO2	1	154929501	154934258	5	0	0.0441176		129	LY6H	8	144239330	144241457	8	5	0.011167		129	HSF1	8	145515250	145538389	2	11	0.0414053		129	DAP3	1	155658881	155708801
130	CHMP5	9	33264876	33282067	5	0	0.0108359		130	C3orf79	3	153202283	153220486	6	0	0.0113636		130	LOC101928120	1	154933946	154935101	5	0	0.0441176		130	GPIHBP1	8	144295067	144299044	8	5	0.011167		130	DGAT1	8	145538245	145550582	2	11	0.0414053		130	GON4L	1	155719448	155827086
131	AQP7	9	33384947	33402680	5	0	0.0108359		131	MME	3	154797435	154901518	6	0	0.0113636		131	SHC1	1	154934773	154943223	5	0	0.0441176		131	ZFP41	8	144328990	144335761	8	5	0.011167		131	SCRT1	8	145554227	145559943	2	11	0.0414053		131	RIT1	1	155867598	155880706
132	AQP3	9	33441151	33447631	5	0	0.0108359		132	C3orf33	3	155480400	155524076	6	0	0.0113636		132	CKS1B	1	154947117	154951725	5	0	0.0441176		132	GLI4	8	144349606	144359101	8	5	0.011167		132	TMEM249	8	145576885	145578591	2	11	0.0414053		132	KHDC4	1	155882833	155904233
133	NOL6	9	33461350	33473941	5	0	0.0108359		133	SLC33A1	3	155544299	155572248	6	0	0.0113636		133	FLAD1	1	154955769	154961488	5	0	0.0441176		133	ZNF696	8	144373558	144382122	8	5	0.011167		133	FBXL6	8	145579087	145582183	2	11	0.0414053		133	RXFP4	1	155911479	155912625
134	RPTOR	17	78518624	78940173	5	0	0.0108359		134	GMPS	3	155588324	155655521	6	0	0.0113636		134	LENEP	1	154966061	154966791	5	0	0.0441176		134	RHPN1	8	144451024	144466390	8	5	0.011167		134	SLC52A2	8	145582216	145584946	2	11	0.0414053		134	ARHGEF2	1	155916629	155947966
135	RBFOX3	17	77085426	77512230	5	0	0.0108359		135	SSR3	3	156257341	156271914	6	0	0.0113636		135	ZBTB7B	1	154975105	154991001	5	0	0.0441176		135	MAFA	8	144510229	144512602	8	5	0.011167		135	ADCK5	8	145597703	145618457	2	11	0.0414053		135	SSR2	1	155978838	155990758
136	ENGASE	17	77071018	77084685	5	0	0.0108359		136	TIPARP	3	156392204	156424559	6	0	0.0113636		136	DCST2	1	154991002	155006257	5	0	0.0441176		136	GSDMD	8	144635556	144645232	8	5	0.011167		136	SLC39A4	8	145637797	145638975	2	11	0.0414053		136	UBQLN4	1	156005084	156023616
137	NCALD	8	102698769	102803439	9	4	0.0108359		137	CCNL1	3	156864290	156878549	6	0	0.0113636		137	DCST1	1	155006281	155023406	5	0	0.0441176		137	MROH6	8	144648361	144654928	8	5	0.011167		137	VPS28	8	145648983	145653946	2	11	0.0414053		137	LAMTOR2	1	156024516	156028301
138	UBR5	8	103264500	103424917	9	4	0.0108359		138	SHOX2	3	157813799	157823952	6	0	0.0113636		138	ADAM15	1	155023747	155031159	5	0	0.0441176		138	NAPRT	8	144656954	144660521	8	5	0.011167		138	TONSL	8	145654162	145669812	2	11	0.0414053		138	RAB25	1	156030939	156040305
139	RRM2B	8	103216728	103251059	9	4	0.0108359		139	MLF1	3	158288952	158324249	6	0	0.0113636		139	EFNA4	1	155036212	155042029	5	0	0.0441176		139	EEF1D	8	144661891	144679583	8	5	0.011167		139	CYHR1	8	145674964	145688234	2	11	0.0414053		139	MEX3A	1	156041803	156051789
140	ODF1	8	103563847	103573245	9	4	0.0108359		140	GFM1	3	158362316	158400222	6	0	0.0113636		140	SLC25A44	1	156163722	156182587	5	0	0.0441176		140	TIGD5	8	144680073	144682485	8	5	0.011167		140	KIFC2	8	145691719	145699499	2	11	0.0414053		140	SEMA4A	1	156119734	156147542
141	KLF10	8	103661004	103666192	9	4	0.0108359		141	LXN	3	158384202	158390482	6	0	0.0113636		141	PMF1	1	156182778	156209868	5	0	0.0441176		141	PYCR3	8	144685393	144691784	8	5	0.011167		141	FOXH1	8	145699114	145701718	2	11	0.0414053		141	PCOLCE2	3	142536701	142608045
142	SLC26A7	8	92221721	92410383	8	3	0.0197666		142	RARRES1	3	158414896	158450275	6	0	0.0113636		142	PMF1-BGLAP	1	156182778	156213123	5	0	0.0441176		142	TSTA3	8	144694787	144699649	8	5	0.011167		142	PPP1R16A	8	145703364	145727504	2	11	0.0414053		142	ARL6	3	97483364	97520086
143	VPS13B	8	100025493	100889814	8	3	0.0197666		143	MFSD1	3	158519714	158547508	6	0	0.0113636		143	BGLAP	1	156211752	156213123	5	0	0.0441176		143	ZNF623	8	144718182	144735900	8	5	0.011167		143	GPT	8	145729464	145732555	2	11	0.0414053		143	DCBLD2	3	98514813	98620533
144	RSPO2	8	108911543	109094167	8	3	0.0197666		144	IL12A	3	159706622	159713806	6	0	0.0113636		144	PAQR6	1	156213111	156217908	5	0	0.0441176		144	ZNF707	8	144766621	144777555	8	5	0.011167		144	MFSD3	8	145734418	145736611	2	11	0.0414053		144	FNDC3B	3	171757417	172118493
145	PXDNL	8	52232136	52722005	8	3	0.0197666		145	C3orf80	3	159943422	159946000	6	0	0.0113636		145	TMEM79	1	156254069	156262234	5	0	0.0441176		145	CCDC166	8	144788863	144790279	8	5	0.011167		145	RECQL4	8	145736666	145743210	2	11	0.0414053		145	KCNMB2	3	178254085	178562217
146	STAU2	8	74332603	74659162	8	3	0.0197666		146	SMC4	3	160117091	160152750	6	0	0.0113636		146	GLMP	1	156262477	156265480	5	0	0.0441176		146	MAPK15	8	144798506	144804633	8	5	0.011167		146	LRRC14	8	145743348	145750562	2	11	0.0414053		146	ACAP2	3	194995464	195163817
147	ZFHX4	8	77593514	77779521	8	3	0.0197666		147	TRIM59	3	160153290	160167626	6	0	0.0113636		147	VHLL	1	156268414	156269428	5	0	0.0441176		147	FAM83H	8	144806102	144815914	8	5	0.011167		147	ZNF251	8	145946293	145980970	2	11	0.0414053		147	UBXN7	3	196080360	196159345
148	CNBD1	8	87878675	88394955	8	3	0.0197666		148	KPNA4	3	160212782	160283376	6	0	0.0113636		148	CCT3	1	156278751	156308206	5	0	0.0441176		148	SCRIB	8	144873089	144897549	8	5	0.011167		148	ZNF34	8	145997608	146012730	2	11	0.0414053		148	ARL13B	3	93698982	93774125
149	MMP16	8	89049459	89339717	8	3	0.0197666		149	ARL14	3	160394947	160396236	6	0	0.0113636		149	TSACC	1	156307104	156316786	5	0	0.0441176		149	PUF60	8	144898513	144911279	8	5	0.011167		149	RPL8	8	146015149	146017774	2	11	0.0414053		149	EPHA6	3	96533424	97467786
150	RAD54B	8	95384187	95449180	8	3	0.0197666		150	B3GALNT1	3	160801670	160822683	6	0	0.0113636		150	RHBG	1	156338979	156355013	5	0	0.0441176		150	NRBP2	8	144915754	144923146	8	5	0.011167		150	ZNF517	8	146024260	146034529	2	11	0.0414053		150	CRYBG3	3	97540883	97663830
151	SDC2	8	97505881	97624037	8	3	0.0197666		151	SLITRK3	3	164904507	164913790	6	0	0.0113636		151	NVL	1	224415035	224517891	5	0	0.0441176		151	EPPK1	8	144939491	144952632	8	5	0.011167		151	ZNF7	8	146052902	146068607	2	11	0.0414053		151	CPOX	3	98298289	98312455
152	STK3	8	99466858	99837899	8	3	0.0197666		152	SERPINI2	3	167159576	167191920	6	0	0.0113636		152	CNIH4	1	224544512	224564586	5	0	0.0441176		152	PLEC	8	144989314	145050913	8	5	0.011167		152	COMMD5	8	146075550	146078452	2	11	0.0414053		152	DBR1	3	137879829	137893791
153	RIMS2	8	104512975	105266656	8	3	0.0197666		153	PDCD10	3	167401693	167452594	6	0	0.0113636		153	WDR26	1	224572844	224622001	5	0	0.0441176		153	PARP10	8	145051319	145060639	8	5	0.011167		153	ZNF250	8	146102335	146126846	2	11	0.0414053		153	NME9	3	137980278	138048728
154	TRHR	8	110099652	110131813	8	3	0.0197666		154	GHSR	3	172161080	172166246	6	0	0.0113636		154	LBR	1	225589203	225615815	5	0	0.0441176		154	GRINA	8	145064225	145067583	8	5	0.011167		154	ZNF16	8	146155743	146176274	2	11	0.0414053		154	MRPS22	3	139062860	139075888
155	SAMD12	8	119201693	119634184	8	3	0.0197666		155	CPN2	3	194060493	194072057	6	0	0.0113636		155	EPHX1	1	225997775	226033264	5	0	0.0441176		155	OPLAH	8	145106166	145115606	8	5	0.011167		155	C8orf33	8	146277823	146281416	2	11	0.0414053		155	NMNAT3	3	139279021	139396892
156	ENPP2	8	120569316	120651106	8	3	0.0197666		156	LRRC15	3	194075975	194090472	6	0	0.0113636		156	TMEM63A	1	226033232	226070420	5	0	0.0441176		156	EXOSC4	8	145133521	145135551	8	5	0.011167		156	GRHL2	8	102504666	102681954	3	12	0.0426168		156	CLSTN2	3	139654026	140286919
157	SNTB1	8	121547984	121824309	8	3	0.0197666		157	ATP13A3	3	194123402	194188968	6	0	0.0113636		157	LEFTY1	1	226073981	226076846	5	0	0.0441176		157	GPAA1	8	145137523	145141119	8	5	0.011167		157	AZIN1	8	103838529	103876428	3	12	0.0426168		157	SPSB4	3	140770243	140867453
158	ST18	8	53023391	53322439	8	3	0.0197666		158	RALY	20	32581457	32670991	6	0	0.0113636		158	PYCR2	1	226107576	226112040	5	0	0.0441176		158	CYC1	8	145149937	145152430	8	5	0.011167		158	MYC	8	128748314	128753680	3	12	0.0426168		158	TRPC1	3	142443265	142526730
159	KCNB2	8	73449625	73850584	8	3	0.0197666		159	AHCY	20	32868070	32899608	6	0	0.0113636		159	LEFTY2	1	226124297	226129192	5	0	0.0441176		159	SHARPIN	8	145153535	145159140	8	5	0.011167		159	YY1AP1	1	155629232	155649620	6	3	0.046141		159	U2SURP	3	142720371	142779567
160	TERF1	8	73921096	73959987	8	3	0.0197666		160	ITCH	20	32951040	33099578	6	0	0.0113636		160	SDE2	1	226170402	226187066	5	0	0.0441176		160	MAF1	8	145159304	145162515	8	5	0.011167		160	GMDS	6	1624034	2176225	3	0	0.0461538		160	SLC9A9	3	142984063	143567373
161	UBE2W	8	74692331	74791145	8	3	0.0197666		161	PIGU	20	33148345	33265089	6	0	0.0113636		161	H3F3A	1	226250407	226259703	5	0	0.0441176		161	WDR97	8	145162594	145171286	8	5	0.011167		161	BPHL	6	3118609	3153432	3	0	0.0461538		161	PLD1	3	171318194	171528284
162	PI15	8	75736771	75767279	8	3	0.0197666		162	TP53INP2	20	33292111	33301243	6	0	0.0113636		162	MIXL1	1	226411318	226414756	5	0	0.0441176		162	HGH1	8	145192671	145195746	8	5	0.011167		162	MYLK4	6	2663862	2770564	3	0	0.0461538		162	TMEM212	3	171561138	171577108
163	HNF4G	8	76319904	76479078	8	3	0.0197666		163	EIF2S2	20	32676103	32700162	6	0	0.0113636		163	PARP1	1	226548391	226595801	5	0	0.0441176		163	BOP1	8	145316948	145331185	8	5	0.011167		163	NQO2	6	3000049	3020110	3	0	0.0461538		163	TNFSF10	3	172223297	172241297
164	PKIA	8	79428335	79517502	8	3	0.0197666		164	ASIP	20	32848170	32857148	6	0	0.0113636		164	PSEN2	1	227058272	227083804	5	0	0.0441176		164	SCX	8	145321460	145323386	8	5	0.011167		164	SLC22A23	6	3269206	3445247	3	0	0.0461538		164	NCEH1	3	172348434	172429008
165	PAG1	8	81880044	82024303	8	3	0.0197666		165	DYNLRB1	20	33104188	33123391	6	0	0.0113636		165	JMJD4	1	227918889	227923112	5	0	0.0441176		165	HSF1	8	145515250	145538389	8	5	0.011167		165	FOXQ1	6	1312674	1314993	3	0	0.0461538		165	ECT2	3	172468474	172539264
166	FABP12	8	82437215	82446047	8	3	0.0197666		166	MAP1LC3A	20	33134687	33148149	6	0	0.0113636		166	PRSS38	1	228003417	228034171	5	0	0.0441176		166	DGAT1	8	145538245	145550582	8	5	0.011167		166	FOXF2	6	1390068	1395832	3	0	0.0461538		166	SPATA16	3	172607146	172859058
167	IMPA1	8	82569150	82598589	8	3	0.0197666		167	NCOA6	20	33302577	33370207	6	0	0.0113636		167	WNT9A	1	228109164	228135676	5	0	0.0441176		167	SCRT1	8	145554227	145559943	8	5	0.011167		167	FOXC1	6	1610680	1614132	3	0	0.0461538		167	TBL1XR1	3	176737142	176914272
168	RALYL	8	85095452	85834079	8	3	0.0197666		168	NCALD	8	102698769	102803439	9	3	0.0192308		168	ARF1	1	228270360	228286913	5	0	0.0441176		168	TMEM249	8	145576885	145578591	8	5	0.011167		168	WRNIP1	6	2765665	2785979	3	0	0.0461538		168	ZMAT3	3	178735010	178789656
169	E2F5	8	86089618	86126753	8	3	0.0197666		169	GRHL2	8	102504666	102681954	9	3	0.0192308		169	C1orf35	1	228288427	228291163	5	0	0.0441176		169	FBXL6	8	145579087	145582183	8	5	0.011167		169	SERPINB1	6	2832565	2842283	3	0	0.0461538		169	PIK3CA	3	178866310	178957881
170	CA1	8	86240457	86253943	8	3	0.0197666		170	UBR5	8	103264500	103424917	9	3	0.0192308		170	MRPL55	1	228294379	228297013	5	0	0.0441176		170	SLC52A2	8	145582216	145584946	8	5	0.011167		170	SERPINB9	6	2887498	2903546	3	0	0.0461538		170	LPP	3	187871660	188608460
171	CA2	8	86376130	86393721	8	3	0.0197666		171	RRM2B	8	103216728	103251059	9	3	0.0192308		171	GUK1	1	228327784	228336656	5	0	0.0441176		171	ADCK5	8	145597703	145618457	8	5	0.011167		171	SERPINB6	6	2948392	2962404	3	0	0.0461538		171	HES1	3	193853930	193856401
172	ATP6V0D2	8	87111138	87166454	8	3	0.0197666		172	ODF1	8	103563847	103573245	9	3	0.0192308		172	GJC2	1	228337414	228347527	5	0	0.0441176		172	SLC39A4	8	145637797	145638975	8	5	0.011167		172	RIPK1	6	3064121	3115421	3	0	0.0461538		172	GP5	3	194115549	194119995
173	WWP1	8	87354993	87480181	8	3	0.0197666		173	KLF10	8	103661004	103666192	9	3	0.0192308		173	IBA57	1	228353508	228369958	5	0	0.0441176		173	VPS28	8	145648983	145653946	8	5	0.011167		173	TUBB2A	6	3153899	3157783	3	0	0.0461538		173	XXYLT1	3	194789007	194968649
174	CPNE3	8	87526655	87573726	8	3	0.0197666		174	AZIN1	8	103838529	103876428	9	3	0.0192308		174	TRIM17	1	228595635	228604583	5	0	0.0441176		174	TONSL	8	145654162	145669812	8	5	0.011167		174	PXDC1	6	3722835	3752246	3	0	0.0461538		174	APOD	3	195295572	195311076
175	CNGB3	8	87586162	87755903	8	3	0.0197666		175	MYC	8	128748314	128753680	9	3	0.0192308		175	HIST3H3	1	228612545	228613026	5	0	0.0441176		175	CYHR1	8	145674964	145688234	8	5	0.011167		175	FAM50B	6	3849599	3851554	3	0	0.0461538		175	SLC51A	3	195943382	195960301
176	NBN	8	90945563	90996899	8	3	0.0197666		176	CEP63	3	134204574	134283870	5	0	0.0336538		176	HIST3H2A	1	228645064	228645560	5	0	0.0441176		176	KIFC2	8	145691719	145699499	8	5	0.011167		176	KAAG1	6	24357130	24358512	3	0	0.0461538		176	RNF168	3	196195653	196230639
177	CALB1	8	91070835	91095109	8	3	0.0197666		177	ALDH1L1	3	125822403	125899645	5	0	0.0336538		177	HIST3H2BB	1	228645807	228646259	5	0	0.0441176		177	FOXH1	8	145699114	145701718	8	5	0.011167		177	FAM133A	X	92929011	92967273	3	0	0.0461538		177	PAK2	3	196466727	196559518
178	NECAB1	8	91803920	91971630	8	3	0.0197666		178	PCOLCE2	3	142536701	142608045	5	0	0.0336538		178	RNF187	1	228675067	228683889	5	0	0.0441176		178	PPP1R16A	8	145703364	145727504	8	5	0.011167		178	NAP1L3	X	92925924	92928682	3	0	0.0461538		178	SENP5	3	196594726	196661585
179	PIP4P2	8	92006498	92053203	8	3	0.0197666		179	VPS8	3	184529930	184770402	5	0	0.0336538		179	BTNL10	1	228698059	228699989	5	0	0.0441176		179	GPT	8	145729464	145732555	8	5	0.011167		179	SOS2	14	50583836	50698411	3	0	0.0461538		179	MELTF	3	196728610	196756687
180	LRRC69	8	92114846	92231464	8	3	0.0197666		180	SEMA5B	3	122628039	122694981	5	0	0.0336538		180	RHOU	1	228870823	228882416	5	0	0.0441176		180	MFSD3	8	145734418	145736611	8	5	0.011167		180	L2HGDH	14	50709151	50778947	3	0	0.0461538		180	STX19	3	93733212	93747454
181	RUNX1T1	8	92967194	93075191	8	3	0.0197666		181	EEFSEC	3	127872299	128127489	5	0	0.0336538		181	RAB4A	1	229406808	229441641	5	0	0.0441176		181	RECQL4	8	145736666	145743210	8	5	0.011167		181	RAD51B	14	68286495	69149835	3	0	0.0461538		181	DHFR2	3	93776765	93781831
182	CDH17	8	95139393	95220815	8	3	0.0197666		182	COPG1	3	128968452	128996616	5	0	0.0336538		182	SPHAR	1	229440128	229441251	5	0	0.0441176		182	LRRC14	8	145743348	145750562	8	5	0.011167		182	RBM25	14	73525220	73588076	3	0	0.0461538		182	NSUN3	3	93781854	93845630
183	VIRMA	8	95500004	95565746	8	3	0.0197666		183	BFSP2	3	133118838	133194056	5	0	0.0336538		183	CCSAP	1	229456751	229478688	5	0	0.0441176		183	ZNF251	8	145946293	145980970	8	5	0.011167		183	PSEN1	14	73603142	73690399	3	0	0.0461538		183	RIOX2	3	97660660	97691295
184	ESRP1	8	95653363	95719694	8	3	0.0197666		184	STAG1	3	136055998	136471245	5	0	0.0336538		184	ACTA1	1	229566991	229569843	5	0	0.0441176		184	ZNF34	8	145997608	146012730	8	5	0.011167		184	NUMB	14	73741917	73925286	3	0	0.0461538		184	GABRR3	3	97705526	97754148
185	TP53INP1	8	95938199	95961615	8	3	0.0197666		185	NAALADL2	3	174577110	175523428	5	0	0.0336538		185	ABCB10	1	229652328	229694442	5	0	0.0441176		185	RPL8	8	146015149	146017774	8	5	0.011167		185	VCPKMT	14	50575349	50583297	3	0	0.0461538		185	OR5AC2	3	97806016	97806946
186	MTERF3	8	97251625	97273841	8	3	0.0197666		186	KCNMB2	3	178254085	178562217	5	0	0.0336538		186	TAF5L	1	229728857	229761794	5	0	0.0441176		186	ZNF517	8	146024260	146034529	8	5	0.011167		186	PAPLN	14	73704204	73741348	3	0	0.0461538		186	OR5H1	3	97851541	97852483
187	CPQ	8	97657454	98155731	8	3	0.0197666		187	MRPL47	3	179306252	179322434	5	0	0.0336538		187	AGT	1	230838268	230850336	5	0	0.0441176		187	ZNF7	8	146052902	146068607	8	5	0.011167		187	MARCH10	17	60778674	60884014	3	0	0.0461538		187	OR5H14	3	97868229	97869162
188	MTDH	8	98656406	98742488	8	3	0.0197666		188	CCDC39	3	180331795	180397283	5	0	0.0336538		188	CAPN9	1	230883129	230937518	5	0	0.0441176		188	COMMD5	8	146075550	146078452	8	5	0.011167		188	TLK2	17	60556128	60692842	3	0	0.0461538		188	OR5H15	3	97887543	97888485
189	LAPTM4B	8	98787808	98864830	8	3	0.0197666		189	YEATS2	3	183415605	183530413	5	0	0.0336538		189	C1orf198	1	230972864	230991782	5	0	0.0441176		189	ZNF250	8	146102335	146126846	8	5	0.011167		189	EFCAB3	17	60447578	60493840	3	0	0.0461538		189	OR5H6	3	97983128	97984106
190	MATN2	8	98881248	99048948	8	3	0.0197666		190	P3H2	3	189674516	189838908	5	0	0.0336538		190	ARV1	1	231114794	231136479	5	0	0.0441176		190	ZNF16	8	146155743	146176274	8	5	0.011167		190	METTL2A	17	60501245	60527454	3	0	0.0461538		190	OR5H2	3	98001731	98002676
191	ERICH5	8	99076749	99105838	8	3	0.0197666		191	FGF12	3	191857181	192126838	5	0	0.0336538		191	FAM89A	1	231154703	231175995	5	0	0.0441176		191	C8orf33	8	146277823	146281416	8	5	0.011167		191	MRC2	17	60704761	60770962	3	0	0.0461538		191	OR5K4	3	98072697	98073663
192	NIPAL2	8	99202053	99306621	8	3	0.0197666		192	ACAP2	3	194995464	195163817	5	0	0.0336538		192	LOC149373	1	231319844	231323373	5	0	0.0441176		192	TNIK	3	170776202	171178197	7	4	0.0135011		192	C18orf54	18	51884286	51908405	3	0	0.0461538		192	OR5K3	3	98109509	98110475
193	RGS22	8	100973163	101117854	8	3	0.0197666		193	UBXN7	3	196080360	196159345	5	0	0.0336538		193	C1orf131	1	231359508	231376933	5	0	0.0441176		193	SLC7A14	3	170177341	170303863	7	4	0.0135011		193	STARD6	18	51851061	51880943	3	0	0.0461538		193	OR5K1	3	98188323	98189420
194	SPAG1	8	101170262	101254132	8	3	0.0197666		194	ARL13B	3	93698982	93774125	5	0	0.0336538		194	GNPAT	1	231376918	231413719	5	0	0.0441176		194	ACTRT3	3	169484708	169487683	7	4	0.0135011		194	DYNAP	18	52254989	52266724	3	0	0.0461538		194	OR5K2	3	98216524	98217475
195	RNF19A	8	101269286	101322394	8	3	0.0197666		195	KPNA1	3	122140747	122233786	5	0	0.0336538		195	SPRTN	1	231473681	231490775	5	0	0.0441176		195	MYNN	3	169490852	169507504	7	4	0.0135011											195	CLDND1	3	98234316	98241910
196	ATP6V1C1	8	104033247	104085285	8	3	0.0197666		196	DTX3L	3	122283184	122294050	5	0	0.0336538		196	EGLN1	1	231499496	231560790	5	0	0.0441176		196	LRRC34	3	169511215	169530574	7	4	0.0135011											196	GPR15	3	98250742	98253523
197	BAALC	8	104152920	104242533	8	3	0.0197666		197	PARP14	3	122399671	122449687	5	0	0.0336538		197	TSNAX	1	231664398	231702270	5	0	0.0441176		197	LRRIQ4	3	169539709	169555561	7	4	0.0135011											197	ST3GAL6	3	98451079	98514689
198	FZD6	8	104310660	104345094	8	3	0.0197666		198	DIRC2	3	122513900	122599986	5	0	0.0336538		198	SIPA1L2	1	232533710	232651354	5	0	0.0441176		198	LRRC31	3	169557028	169587723	7	4	0.0135011											198	SOX14	3	137483133	137485176
199	LRP12	8	105501458	105601252	8	3	0.0197666		199	PDIA5	3	122785855	122880953	5	0	0.0336538		199	MAP10	1	232940637	232946092	5	0	0.0441176		199	RPL22L1	3	170582663	170588045	7	4	0.0135011											199	CLDN18	3	137717657	137752494
200	ANGPT1	8	108261709	108348743	8	3	0.0197666		200	SEC22A	3	122920773	122992983	5	0	0.0336538		200	NTPCR	1	233086276	233114548	5	0	0.0441176		200	EIF5A2	3	170606203	170626426	7	4	0.0135011											200	DZIP1L	3	137780826	137834451
201	PKHD1L1	8	110374705	110543500	8	3	0.0197666		201	ADCY5	3	123001142	123135189	5	0	0.0336538		201	MAP3K21	1	233463513	233520894	5	0	0.0441176		201	SLC2A2	3	170714136	170744768	7	4	0.0135011											201	A4GNT	3	137842559	137851229
202	SYBU	8	110586404	110704020	8	3	0.0197666		202	MYLK	3	123331142	123603149	5	0	0.0336538		202	KCNK1	1	233749749	233808258	5	0	0.0441176		202	SLC26A7	8	92221721	92410383	8	6	0.0144622											202	ARMC8	3	137906089	137965729
203	EIF3H	8	117657054	117768062	8	3	0.0197666		203	KALRN	3	123813527	124445172	5	0	0.0336538		203	TARBP1	1	234527058	234614849	5	0	0.0441176		203	VPS13B	8	100025493	100889814	8	6	0.0144622											203	MRAS	3	138066489	138124377
204	SLC30A8	8	117962511	118188953	8	3	0.0197666		204	ITGB5	3	124480794	124606152	5	0	0.0336538		204	IRF2BP2	1	234740014	234745271	5	0	0.0441176		204	RSPO2	8	108911543	109094167	8	6	0.0144622											204	ESYT3	3	138153414	138198784
205	EXT1	8	118811601	119124058	8	3	0.0197666		205	MUC13	3	124624288	124653595	5	0	0.0336538		205	RBM34	1	235294497	235324931	5	0	0.0441176		205	PXDNL	8	52232136	52722005	8	6	0.0144622											205	FOXL2	3	138663065	138665982
206	COLEC10	8	119964405	120120694	8	3	0.0197666		206	SLC12A8	3	124801479	124930243	5	0	0.0336538		206	GGPS1	1	235491752	235507847	5	0	0.0441176		206	STAU2	8	74332603	74659162	8	6	0.0144622											206	FOXL2NB	3	138666075	138672830
207	DSCC1	8	120846180	120868170	8	3	0.0197666		207	ZNF148	3	124944512	125094198	5	0	0.0336538		207	ERO1B	1	236378421	236445339	5	0	0.0441176		207	ZFHX4	8	77593514	77779521	8	6	0.0144622											207	PRR23A	3	138722803	138725110
208	DEPTOR	8	120885894	121063157	8	3	0.0197666		208	SNX4	3	125165487	125239058	5	0	0.0336538		208	ACTN2	1	236849753	236927931	5	0	0.0441176		208	CNBD1	8	87878675	88394955	8	6	0.0144622											208	PRR23B	3	138737872	138739768
209	COL14A1	8	121137346	121385814	8	3	0.0197666		209	OSBPL11	3	125247701	125314381	5	0	0.0336538		209	MT1HL1	1	237167402	237167718	5	0	0.0441176		209	MMP16	8	89049459	89339717	8	6	0.0144622											209	PRR23C	3	138760943	138763734
210	MTBP	8	121457637	121535875	8	3	0.0197666		210	ROPN1B	3	125687986	125702297	5	0	0.0336538		210	ZP4	1	238045676	238054222	5	0	0.0441176		210	RAD54B	8	95384187	95449180	8	6	0.0144622											210	COPB2	3	139076432	139108522
211	ZHX2	8	123793900	123986755	8	3	0.0197666		211	UROC1	3	126200007	126236616	5	0	0.0336538		211	GREM2	1	240652872	240775462	5	0	0.0441176		211	SDC2	8	97505881	97624037	8	6	0.0144622											211	RBP2	3	139171725	139195352
212	TBC1D31	8	124084858	124164393	8	3	0.0197666		212	TXNRD3	3	126325894	126373967	5	0	0.0336538		212	FH	1	241660856	241683085	5	0	0.0441176		212	STK3	8	99466858	99837899	8	6	0.0144622											212	RBP1	3	139236275	139258671
213	ZHX1-C8orf76	8	124238428	124286727	8	3	0.0197666		213	CHCHD6	3	126423062	126679249	5	0	0.0336538		213	OPN3	1	241756451	241803701	5	0	0.0441176		213	RIMS2	8	104512975	105266656	8	6	0.0144622											213	TRIM42	3	140396865	140419992
214	ATAD2	8	124332089	124408705	8	3	0.0197666		214	PLXNA1	3	126707436	126756235	5	0	0.0336538		214	CHML	1	241792165	241799232	5	0	0.0441176		214	TRHR	8	110099652	110131813	8	6	0.0144622											214	SLC25A36	3	140660661	140698785
215	FBXO32	8	124510126	124544383	8	3	0.0197666		215	MGLL	3	127407904	127541725	5	0	0.0336538		215	EXO1	1	242011492	242053241	5	0	0.0441176		215	SAMD12	8	119201693	119634184	8	6	0.0144622											215	PXYLP1	3	140950666	141013745
216	FER1L6	8	124864226	125132302	8	3	0.0197666		216	KBTBD12	3	127641901	127706514	5	0	0.0336538		216	BECN2	1	242121068	242122364	5	0	0.0441176		216	ENPP2	8	120569316	120651106	8	6	0.0144622											216	PAQR9	3	142680072	142682178
217	MTSS1	8	125563010	125740748	8	3	0.0197666		217	RUVBL1	3	127783627	127872757	5	0	0.0336538		217	MAP1LC3C	1	242158791	242162385	5	0	0.0441176		217	SNTB1	8	121547984	121824309	8	6	0.0144622											217	CHST2	3	142838617	142842856
218	PCMTD1	8	52730134	52811746	8	3	0.0197666		218	RAB7A	3	128444978	128533641	5	0	0.0336538		218	ZBTB18	1	244212240	244220778	5	0	0.0441176		218	ST18	8	53023391	53322439	8	6	0.0144622											218	C3orf58	3	143690639	143711210
219	SBSPON	8	73976777	74005507	8	3	0.0197666		219	KIAA1257	3	128689778	128712986	5	0	0.0336538		219	C1orf100	1	244515936	244552390	5	0	0.0441176		219	KCNB2	8	73449625	73850584	8	6	0.0144622											219	PLSCR4	3	145910121	145968651
220	C8orf89	8	74153658	74171737	8	3	0.0197666		220	ISY1-RAB43	3	128806411	128880073	5	0	0.0336538		220	COX20	1	244998607	245008365	5	0	0.0441176		220	TERF1	8	73921096	73959987	8	6	0.0144622											220	PLSCR2	3	146151074	146187088
221	RPL7	8	74202873	74205869	8	3	0.0197666		221	IFT122	3	129158878	129239350	5	0	0.0336538		221	HNRNPU	1	245013601	245027827	5	0	0.0441176		221	UBE2W	8	74692331	74791145	8	6	0.0144622											221	PLSCR1	3	146232966	146262628
222	RDH10	8	74206836	74237520	8	3	0.0197666		222	TMCC1	3	129366634	129599402	5	0	0.0336538		222	TFB2M	1	246703862	246729565	5	0	0.0441176		222	PI15	8	75736771	75767279	8	6	0.0144622											222	PLSCR5	3	146294341	146324003
223	ELOC	8	74857372	74884143	8	3	0.0197666		223	COL6A5	3	130064358	130203690	5	0	0.0336538		223	SCCPDH	1	246887377	246931439	5	0	0.0441176		223	HNF4G	8	76319904	76479078	8	6	0.0144622											223	ZIC4	3	147103834	147122071
224	TMEM70	8	74888376	74895018	8	3	0.0197666		224	COL6A6	3	130279177	130395888	5	0	0.0336538		224	ZNF695	1	247108848	247171395	5	0	0.0441176		224	PKIA	8	79428335	79517502	8	6	0.0144622											224	ZIC1	3	147127180	147134506
225	LY96	8	74903563	74941314	8	3	0.0197666		225	PIK3R4	3	130397777	130465696	5	0	0.0336538		225	ZNF669	1	247263263	247267674	5	0	0.0441176		225	PAG1	8	81880044	82024303	8	6	0.0144622											225	AGTR1	3	148415657	148460790
226	JPH1	8	75146934	75233596	8	3	0.0197666		226	ATP2C1	3	130569368	130722046	5	0	0.0336538		226	C1orf229	1	247273461	247275719	5	0	0.0441176		226	FABP12	8	82437215	82446047	8	6	0.0144622											226	CPB1	3	148545587	148577974
227	GDAP1	8	75262617	75279345	8	3	0.0197666		227	NEK11	3	130745693	130893982	5	0	0.0336538		227	VN1R5	1	247419373	247420447	5	0	0.0441176		227	IMPA1	8	82569150	82598589	8	6	0.0144622											227	CPA3	3	148583042	148614878
228	CRISPLD1	8	75896707	75946793	8	3	0.0197666		228	MRPL3	3	131181044	131221860	5	0	0.0336538		228	OR2B11	1	247614330	247615284	5	0	0.0441176		228	RALYL	8	85095452	85834079	8	6	0.0144622											228	GHSR	3	172161080	172166246
229	PEX2	8	77892493	77912524	8	3	0.0197666		229	CPNE4	3	131252403	131754286	5	0	0.0336538		229	OR2W5	1	247654369	247655711	5	0	0.0441176		229	E2F5	8	86089618	86126753	8	6	0.0144622											229	CPN2	3	194060493	194072057
230	STMN2	8	80523048	80578410	8	3	0.0197666		230	DNAJC13	3	132136503	132257876	5	0	0.0336538		230	OR2C3	1	247693433	247697141	5	0	0.0441176		230	CA1	8	86240457	86253943	8	6	0.0144622											230	LRRC15	3	194075975	194090472
231	FABP5	8	82192717	82197012	8	3	0.0197666		231	UBA5	3	132373289	132396951	5	0	0.0336538		231	OR2G2	1	247751661	247752615	5	0	0.0441176		231	CA2	8	86376130	86393721	8	6	0.0144622											231	ATP13A3	3	194123402	194188968
232	PMP2	8	82352560	82359719	8	3	0.0197666		232	TMEM108	3	132757131	133116619	5	0	0.0336538		232	OR2G3	1	247768887	247769817	5	0	0.0441176		232	ATP6V0D2	8	87111138	87166454	8	6	0.0144622											232	PPP1R2	3	195241217	195270224
233	FABP9	8	82370617	82373758	8	3	0.0197666		233	CDV3	3	133292433	133309118	5	0	0.0336538		233	OR13G1	1	247835419	247836343	5	0	0.0441176		233	WWP1	8	87354993	87480181	8	6	0.0144622											233	MUC20	3	195447752	195460424
234	FABP4	8	82390731	82395473	8	3	0.0197666		234	RAB6B	3	133543078	133614691	5	0	0.0336538		234	OR6F1	1	247875130	247876057	5	0	0.0441176		234	CPNE3	8	87526655	87573726	8	6	0.0144622											234	MUC4	3	195473635	195538844
235	SLC10A5	8	82605890	82607207	8	3	0.0197666		235	SLCO2A1	3	133651539	133748920	5	0	0.0336538		235	OR1C1	1	247920763	247921708	5	0	0.0441176		235	CNGB3	8	87586162	87755903	8	6	0.0144622											235	TNK2	3	195590234	195619655
236	ZFAND1	8	82613565	82633539	8	3	0.0197666		236	RYK	3	133875977	133969586	5	0	0.0336538		236	OR14A16	1	247978101	247979031	5	0	0.0441176		236	NBN	8	90945563	90996899	8	6	0.0144622											236	TFRC	3	195776154	195808961
237	CHMP4C	8	82644687	82671750	8	3	0.0197666		237	AMOTL2	3	134074186	134093427	5	0	0.0336538		237	OR11L1	1	248004229	248005198	5	0	0.0441176		237	CALB1	8	91070835	91095109	8	6	0.0144622											237	ZDHHC19	3	195924322	195938300
238	SNX16	8	82711817	82754521	8	3	0.0197666		238	KY	3	134318764	134369864	5	0	0.0336538		238	TRIM58	1	248020500	248043440	5	0	0.0441176		238	NECAB1	8	91803920	91971630	8	6	0.0144622											238	PCYT1A	3	195964615	196014623
239	LRRCC1	8	86019322	86058315	8	3	0.0197666		239	EPHB1	3	134514098	134979309	5	0	0.0336538		239	OR2W3	1	248058888	248059833	5	0	0.0441176		239	PIP4P2	8	92006498	92053203	8	6	0.0144622											239	TCTEX1D2	3	196018089	196045165
240	C8orf59	8	86126287	86132651	8	3	0.0197666		240	PPP2R3A	3	135684514	135866752	5	0	0.0336538		240	OR2T8	1	248084319	248085258	5	0	0.0441176		240	LRRC69	8	92114846	92231464	8	6	0.0144622											240	TM4SF19	3	196050416	196065291
241	CA13	8	86157715	86196302	8	3	0.0197666		241	IL20RB	3	136676706	136729927	5	0	0.0336538		241	OR2L8	1	248112159	248113098	5	0	0.0441176		241	RUNX1T1	8	92967194	93075191	8	6	0.0144622											241	SMCO1	3	196233747	196242237
242	CA3	8	86351055	86361269	8	3	0.0197666		242	DBR1	3	137879829	137893791	5	0	0.0336538		242	OR2AK2	1	248128633	248129641	5	0	0.0441176		242	CDH17	8	95139393	95220815	8	6	0.0144622											242	WDR53	3	196281047	196295545
243	PSKH2	8	87059337	87081926	8	3	0.0197666		243	NME9	3	137980278	138048728	5	0	0.0336538		243	OR2L5	1	248185249	248186188	5	0	0.0441176		243	VIRMA	8	95500004	95565746	8	6	0.0144622											243	FBXO45	3	196295724	196315930
244	SLC7A13	8	87226287	87242604	8	3	0.0197666		244	MRPS22	3	139062860	139075888	5	0	0.0336538		244	OR2T4	1	248524882	248525929	5	0	0.0441176		244	ESRP1	8	95653363	95719694	8	6	0.0144622											244	NRROS	3	196366566	196388875
245	RMDN1	8	87484577	87521009	8	3	0.0197666		245	NMNAT3	3	139279021	139396892	5	0	0.0336538		245	OR2T6	1	248550909	248551836	5	0	0.0441176		245	TP53INP1	8	95938199	95961615	8	6	0.0144622											245	CEP19	3	196433147	196439165
246	DCAF4L2	8	88882970	88886296	8	3	0.0197666		246	CLSTN2	3	139654026	140286919	5	0	0.0336538		246	OR2T1	1	248569295	248570405	5	0	0.0441176		246	MTERF3	8	97251625	97273841	8	6	0.0144622											246	PIGX	3	196439244	196462878
247	RIPK2	8	90769974	90803292	8	3	0.0197666		247	SPSB4	3	140770243	140867453	5	0	0.0336538		247	OR2T2	1	248616098	248617073	5	0	0.0441176		247	CPQ	8	97657454	98155731	8	6	0.0144622											247	NCBP2	3	196662272	196669311
248	OSGIN2	8	90914095	90940096	8	3	0.0197666		248	ZBTB38	3	141043054	141168634	5	0	0.0336538		248	OR2T3	1	248636651	248637608	5	0	0.0441176		248	MTDH	8	98656406	98742488	8	6	0.0144622											248	PIGZ	3	196673213	196695742
249	DECR1	8	91013579	91064227	8	3	0.0197666		249	RASA2	3	141205888	141334205	5	0	0.0336538		249	OR2T5	1	248651889	248652837	5	0	0.0441176		249	LAPTM4B	8	98787808	98864830	8	6	0.0144622											249	AHCY	20	32868070	32899608
250	TMEM64	8	91634222	91658133	8	3	0.0197666		250	TFDP2	3	141663269	141719229	5	0	0.0336538		250	OR2G6	1	248684947	248685898	5	0	0.0441176		250	MATN2	8	98881248	99048948	8	6	0.0144622											250	ASIP	20	32848170	32857148
251	C8orf88	8	91970705	91997485	8	3	0.0197666		251	XRN1	3	142025448	142166904	5	0	0.0336538		251	OR2T29	1	248721844	248722792	5	0	0.0441176		251	ERICH5	8	99076749	99105838	8	6	0.0144622											251	CABIN1	22	24407764	24574596
252	OTUD6B	8	92082423	92099323	8	3	0.0197666		252	ATR	3	142168076	142297668	5	0	0.0336538		252	OR2T34	1	248737101	248738058	5	0	0.0441176		252	NIPAL2	8	99202053	99306621	8	6	0.0144622
253	TRIQK	8	93895757	93977817	8	3	0.0197666		253	PLS1	3	142315228	142432506	5	0	0.0336538		253	OR2T10	1	248756130	248757069	5	0	0.0441176		253	RGS22	8	100973163	101117854	8	6	0.0144622
254	C8orf87	8	94146323	94179079	8	3	0.0197666		254	TRPC1	3	142443265	142526730	5	0	0.0336538		254	OR2T11	1	248789478	248790429	5	0	0.0441176		254	SPAG1	8	101170262	101254132	8	6	0.0144622
255	FAM92A	8	94712734	94741478	8	3	0.0197666		255	U2SURP	3	142720371	142779567	5	0	0.0336538		255	OR2T35	1	248801587	248802559	5	0	0.0441176		255	RNF19A	8	101269286	101322394	8	6	0.0144622
256	RBM12B	8	94743727	94753224	8	3	0.0197666		256	SLC9A9	3	142984063	143567373	5	0	0.0336538		256	OR2T27	1	248813231	248814185	5	0	0.0441176		256	ATP6V1C1	8	104033247	104085285	8	6	0.0144622
257	TMEM67	8	94767071	94830347	8	3	0.0197666		257	NLGN1	3	173116237	174001139	5	0	0.0336538		257	OR14I1	1	248844669	248845605	5	0	0.0441176		257	BAALC	8	104152920	104242533	8	6	0.0144622
258	PDP1	8	94929082	94938296	8	3	0.0197666		258	TBL1XR1	3	176737142	176914272	5	0	0.0336538		258	LYPD8	1	248902715	248903171	5	0	0.0441176		258	FZD6	8	104310660	104345094	8	6	0.0144622
259	GEM	8	95261480	95274547	8	3	0.0197666		259	ZMAT3	3	178735010	178789656	5	0	0.0336538		259	SH3BP5L	1	249104644	249119565	5	0	0.0441176		259	LRP12	8	105501458	105601252	8	6	0.0144622
260	FSBP	8	95439939	95449180	8	3	0.0197666		260	PIK3CA	3	178866310	178957881	5	0	0.0336538		260	ZNF672	1	249132376	249143716	5	0	0.0441176		260	ANGPT1	8	108261709	108348743	8	6	0.0144622
261	DPY19L4	8	95732102	95806076	8	3	0.0197666		261	ZNF639	3	179040778	179053323	5	0	0.0336538		261	ZNF692	1	249144202	249153125	5	0	0.0441176		261	PKHD1L1	8	110374705	110543500	8	6	0.0144622
262	INTS8	8	95835517	95892721	8	3	0.0197666		262	USP13	3	179370932	179507189	5	0	0.0336538		262	PGBD2	1	249200441	249213345	5	0	0.0441176		262	SYBU	8	110586404	110704020	8	6	0.0144622
263	CCNE2	8	95892451	95907482	8	3	0.0197666		263	PEX5L	3	179512745	179692008	5	0	0.0336538		263	ABI3BP	3	100468178	100712334	5	0	0.0441176		263	EIF3H	8	117657054	117768062	8	6	0.0144622
264	NDUFAF6	8	96037202	96070944	8	3	0.0197666		264	ATP11B	3	182511290	182639423	5	0	0.0336538		264	PCOLCE2	3	142536701	142608045	5	0	0.0441176		264	SLC30A8	8	117962511	118188953	8	6	0.0144622
265	PLEKHF2	8	96145948	96168913	8	3	0.0197666		265	LAMP3	3	182840002	182880667	5	0	0.0336538		265	MED12L	3	150804584	151154465	5	0	0.0441176		265	EXT1	8	118811601	119124058	8	6	0.0144622
266	C8orf37	8	96257140	96281462	8	3	0.0197666		266	MCF2L2	3	182895791	183146057	5	0	0.0336538		266	P2RY14	3	150929904	150996230	5	0	0.0441176		266	COLEC10	8	119964405	120120694	8	6	0.0144622
267	GDF6	8	97154560	97173020	8	3	0.0197666		267	B3GNT5	3	182971031	182991179	5	0	0.0336538		267	IQCJ-SCHIP1	3	158787040	159615155	5	0	0.0441176		267	DSCC1	8	120846180	120868170	8	6	0.0144622
268	UQCRB	8	97238903	97247862	8	3	0.0197666		268	KLHL6	3	183205318	183273499	5	0	0.0336538		268	SCHIP1	3	158991035	159615155	5	0	0.0441176		268	DEPTOR	8	120885894	121063157	8	6	0.0144622
269	PTDSS1	8	97274113	97346780	8	3	0.0197666		269	KLHL24	3	183353410	183402307	5	0	0.0336538		269	GOLIM4	3	167726459	167813713	5	0	0.0441176		269	COL14A1	8	121137346	121385814	8	6	0.0144622
270	TSPYL5	8	98285713	98290176	8	3	0.0197666		270	AP2M1	3	183892633	183901879	5	0	0.0336538		270	CMSS1	3	99536677	99897476	5	0	0.0441176		270	MTBP	8	121457637	121535875	8	6	0.0144622
271	RPL30	8	99053937	99057818	8	3	0.0197666		271	PSMD2	3	184016885	184026842	5	0	0.0336538		271	FILIP1L	3	99551987	99833357	5	0	0.0441176		271	ZHX2	8	123793900	123986755	8	6	0.0144622
272	RIDA	8	99114566	99129418	8	3	0.0197666		272	LINC02054	3	184119324	184157436	5	0	0.0336538		272	PIK3CB	3	138371539	138426463	5	0	0.0441176		272	TBC1D31	8	124084858	124164393	8	6	0.0144622
273	POP1	8	99129520	99172069	8	3	0.0197666		273	EPHB3	3	184279586	184300196	5	0	0.0336538		273	CP	3	148890285	148939832	5	0	0.0441176		273	ZHX1-C8orf76	8	124238428	124286727	8	6	0.0144622
274	KCNS2	8	99439249	99443025	8	3	0.0197666		274	C3orf70	3	184795837	184870802	5	0	0.0336538		274	MBNL1	3	151986256	152183569	5	0	0.0441176		274	ATAD2	8	124332089	124408705	8	6	0.0144622
275	OSR2	8	99956630	99964332	8	3	0.0197666		275	EHHADH	3	184908411	184971886	5	0	0.0336538		275	GPR149	3	154055460	154147504	5	0	0.0441176		275	FBXO32	8	124510126	124544383	8	6	0.0144622
276	COX6C	8	100890222	100906242	8	3	0.0197666		276	MAP3K13	3	185000728	185206882	5	0	0.0336538		276	KCNAB1	3	155838336	156256541	5	0	0.0441176		276	FER1L6	8	124864226	125132302	8	6	0.0144622
277	FBXO43	8	101145587	101158099	8	3	0.0197666		277	SENP2	3	185304030	185348889	5	0	0.0336538		277	PQLC2L	3	157261132	157296680	5	0	0.0441176		277	MTSS1	8	125563010	125740748	8	6	0.0144622
278	POLR2K	8	101162838	101166230	8	3	0.0197666		278	IGF2BP2	3	185360918	185538919	5	0	0.0336538		278	KCNMB2	3	178254085	178562217	5	0	0.0441176		278	PCMTD1	8	52730134	52811746	8	6	0.0144622
279	ANKRD46	8	101521979	101572014	8	3	0.0197666		279	DGKG	3	185864989	186080023	5	0	0.0336538		279	ACAP2	3	194995464	195163817	5	0	0.0441176		279	SBSPON	8	73976777	74005507	8	6	0.0144622
280	SNX31	8	101585109	101661893	8	3	0.0197666		280	HRG	3	186383740	186396029	5	0	0.0336538		280	UBXN7	3	196080360	196159345	5	0	0.0441176		280	C8orf89	8	74153658	74171737	8	6	0.0144622
281	PABPC1	8	101715143	101734315	8	3	0.0197666		281	RFC4	3	186507680	186524290	5	0	0.0336538		281	ARL13B	3	93698982	93774125	5	0	0.0441176		281	RPL7	8	74202873	74205869	8	6	0.0144622
282	YWHAZ	8	101930803	101962799	8	3	0.0197666		282	ST6GAL1	3	186648314	186796341	5	0	0.0336538		282	COL8A1	3	99357439	99515577	5	0	0.0441176		282	RDH10	8	74206836	74237520	8	6	0.0144622
283	ZNF706	8	102209265	102217960	8	3	0.0197666		283	TPRG1	3	188889762	189041271	5	0	0.0336538		283	TBC1D23	3	99979660	100044096	5	0	0.0441176		283	ELOC	8	74857372	74884143	8	6	0.0144622
284	CTHRC1	8	104383742	104395233	8	3	0.0197666		284	TP63	3	189314534	189615068	5	0	0.0336538		284	LNP1	3	100120036	100175170	5	0	0.0441176		284	TMEM70	8	74888376	74895018	8	6	0.0144622
285	SLC25A32	8	104410865	104427563	8	3	0.0197666		285	IL1RAP	3	190231839	190348074	5	0	0.0336538		285	TMEM45A	3	100211462	100296297	5	0	0.0441176		285	LY96	8	74903563	74941314	8	6	0.0144622
286	DCAF13	8	104426941	104455681	8	3	0.0197666		286	GMNC	3	190570525	190580465	5	0	0.0336538		286	ADGRG7	3	100328432	100414323	5	0	0.0441176		286	JPH1	8	75146934	75233596	8	6	0.0144622
287	DCSTAMP	8	105352023	105368917	8	3	0.0197666		287	OSTN	3	190917029	190983404	5	0	0.0336538		287	SENP7	3	101043032	101232085	5	0	0.0441176		287	GDAP1	8	75262617	75279345	8	6	0.0144622
288	DPYS	8	105391651	105479277	8	3	0.0197666		288	CCDC50	3	191046873	191116459	5	0	0.0336538		288	CEP97	3	101443436	101489406	5	0	0.0441176		288	CRISPLD1	8	75896707	75946793	8	6	0.0144622
289	ABRA	8	107771710	107782472	8	3	0.0197666		289	MB21D2	3	192514603	192635950	5	0	0.0336538		289	DBR1	3	137879829	137893791	5	0	0.0441176		289	PEX2	8	77892493	77912524	8	6	0.0144622
290	EIF3E	8	109213971	109260959	8	3	0.0197666		290	ATP13A5	3	192992830	193096514	5	0	0.0336538		290	NME9	3	137980278	138048728	5	0	0.0441176		290	STMN2	8	80523048	80578410	8	6	0.0144622
291	EMC2	8	109455811	109483392	8	3	0.0197666		291	ATP13A4	3	193116755	193272911	5	0	0.0336538		291	CEP70	3	138213180	138313225	5	0	0.0441176		291	FABP5	8	82192717	82197012	8	6	0.0144622
292	TMEM74	8	109791204	109799844	8	3	0.0197666		292	OPA1	3	193310932	193415600	5	0	0.0336538		292	MRPS22	3	139062860	139075888	5	0	0.0441176		292	PMP2	8	82352560	82359719	8	6	0.0144622
293	NUDCD1	8	110253147	110342162	8	3	0.0197666		293	LSG1	3	194361516	194393206	5	0	0.0336538		293	NMNAT3	3	139279021	139396892	5	0	0.0441176		293	FABP9	8	82370617	82373758	8	6	0.0144622
294	ENY2	8	110346551	110358189	8	3	0.0197666		294	XXYLT1	3	194789007	194968649	5	0	0.0336538		294	CLSTN2	3	139654026	140286919	5	0	0.0441176		294	FABP4	8	82390731	82395473	8	6	0.0144622
295	EBAG9	8	110551928	110578225	8	3	0.0197666		295	APOD	3	195295572	195311076	5	0	0.0336538		295	SPSB4	3	140770243	140867453	5	0	0.0441176		295	SLC10A5	8	82605890	82607207	8	6	0.0144622
296	LOC100132813	8	110656343	110660313	8	3	0.0197666		296	SLC51A	3	195943382	195960301	5	0	0.0336538		296	TRPC1	3	142443265	142526730	5	0	0.0441176		296	ZFAND1	8	82613565	82633539	8	6	0.0144622
297	KCNV1	8	110975873	110988076	8	3	0.0197666		297	RNF168	3	196195653	196230639	5	0	0.0336538		297	U2SURP	3	142720371	142779567	5	0	0.0441176		297	CHMP4C	8	82644687	82671750	8	6	0.0144622
298	UTP23	8	117778741	117786923	8	3	0.0197666		298	PAK2	3	196466727	196559518	5	0	0.0336538		298	SLC9A9	3	142984063	143567373	5	0	0.0441176		298	SNX16	8	82711817	82754521	8	6	0.0144622
299	RAD21	8	117858172	117887105	8	3	0.0197666		299	SENP5	3	196594726	196661585	5	0	0.0336538		299	HLTF	3	148747850	148804341	5	0	0.0441176		299	LRRCC1	8	86019322	86058315	8	6	0.0144622
300	AARD	8	117950463	117956239	8	3	0.0197666		300	MELTF	3	196728610	196756687	5	0	0.0336538		300	WWTR1	3	149235021	149375812	5	0	0.0441176		300	C8orf59	8	86126287	86132651	8	6	0.0144622
301	MED30	8	118532951	118552501	8	3	0.0197666		301	XPC	3	14186646	14220172	5	0	0.0336538		301	RNF13	3	149530474	149679926	5	0	0.0441176		301	CA13	8	86157715	86196302	8	6	0.0144622
302	TNFRSF11B	8	119935795	119964383	8	3	0.0197666		302	LSM3	3	14220227	14239869	5	0	0.0336538		302	PFN2	3	149682690	149688741	5	0	0.0441176		302	CA3	8	86351055	86361269	8	6	0.0144622
303	MAL2	8	120220609	120257913	8	3	0.0197666		303	STX19	3	93733212	93747454	5	0	0.0336538		303	SELENOT	3	150321065	150348234	5	0	0.0441176		303	PSKH2	8	87059337	87081926	8	6	0.0144622
304	NOV	8	120428551	120436678	8	3	0.0197666		304	DHFR2	3	93776765	93781831	5	0	0.0336538		304	SIAH2	3	150458909	150481263	5	0	0.0441176		304	SLC7A13	8	87226287	87242604	8	6	0.0144622
305	TAF2	8	120743013	120845074	8	3	0.0197666		305	NSUN3	3	93781854	93845630	5	0	0.0336538		305	ARHGEF26	3	153838791	153975616	5	0	0.0441176		305	RMDN1	8	87484577	87521009	8	6	0.0144622
306	MRPL13	8	121408082	121457647	8	3	0.0197666		306	CD86	3	121774208	121839990	5	0	0.0336538		306	DHX36	3	153993456	154042286	5	0	0.0441176		306	DCAF4L2	8	88882970	88886296	8	6	0.0144622
307	HAS2	8	122625270	122653630	8	3	0.0197666		307	CASR	3	121902529	122005344	5	0	0.0336538		307	PLCH1	3	155197670	155394105	5	0	0.0441176		307	RIPK2	8	90769974	90803292	8	6	0.0144622
308	DERL1	8	124025403	124054663	8	3	0.0197666		308	CSTA	3	122044010	122060816	5	0	0.0336538		308	LEKR1	3	156544095	156763918	5	0	0.0441176		308	OSGIN2	8	90914095	90940096	8	6	0.0144622
309	FAM83A	8	124191286	124222319	8	3	0.0197666		309	CCDC58	3	122078437	122102078	5	0	0.0336538		309	VEPH1	3	156977530	157217445	5	0	0.0441176		309	DECR1	8	91013579	91064227	8	6	0.0144622
310	C8orf76	8	124232195	124253638	8	3	0.0197666		310	FAM162A	3	122103022	122128961	5	0	0.0336538		310	PTX3	3	157154579	157161417	5	0	0.0441176		310	TMEM64	8	91634222	91658133	8	6	0.0144622
311	ZHX1	8	124260689	124286727	8	3	0.0197666		311	WDR5B	3	122130699	122134882	5	0	0.0336538		311	RSRC1	3	157827840	158262624	5	0	0.0441176		311	C8orf88	8	91970705	91997485	8	6	0.0144622
312	WDYHV1	8	124428964	124454480	8	3	0.0197666		312	PARP9	3	122246756	122283147	5	0	0.0336538		312	IQCJ	3	158787040	158981536	5	0	0.0441176		312	OTUD6B	8	92082423	92099323	8	6	0.0144622
313	KLHL38	8	124657914	124665190	8	3	0.0197666		313	PARP15	3	122296448	122357894	5	0	0.0336538		313	IFT80	3	159974773	160101554	5	0	0.0441176		313	TRIQK	8	93895757	93977817	8	6	0.0144622
314	ANXA13	8	124693033	124749666	8	3	0.0197666		314	HSPBAP1	3	122458843	122512666	5	0	0.0336538		314	PPM1L	3	160473991	160796695	5	0	0.0441176		314	C8orf87	8	94146323	94179079	8	6	0.0144622
315	FAM91A1	8	124780678	124822901	8	3	0.0197666		315	HACD2	3	123210394	123303464	5	0	0.0336538		315	NMD3	3	160939077	160969795	5	0	0.0441176		315	FAM92A	8	94712734	94741478	8	6	0.0144622
316	TMEM65	8	125323158	125384940	8	3	0.0197666		316	UMPS	3	124449212	124468120	5	0	0.0336538		316	SPTSSB	3	161062579	161089871	5	0	0.0441176		316	RBM12B	8	94743727	94753224	8	6	0.0144622
317	TRMT12	8	125463047	125465267	8	3	0.0197666		317	HEG1	3	124684553	124774802	5	0	0.0336538		317	BCHE	3	165490690	165555260	5	0	0.0441176		317	TMEM67	8	94767071	94830347	8	6	0.0144622
318	RNF139	8	125487007	125500859	8	3	0.0197666		318	ALG1L	3	125648117	125655887	5	0	0.0336538		318	ZBBX	3	166958074	167098071	5	0	0.0441176		318	PDP1	8	94929082	94938296	8	6	0.0144622
319	TATDN1	8	125500734	125551329	8	3	0.0197666		319	SLC41A3	3	125725199	125775618	5	0	0.0336538		319	WDR49	3	167196471	167371289	5	0	0.0441176		319	GEM	8	95261480	95274547	8	6	0.0144622
320	NDUFB9	8	125551342	125562227	8	3	0.0197666		320	KLF15	3	126061477	126076236	5	0	0.0336538		320	SERPINI1	3	167453431	167543357	5	0	0.0441176		320	FSBP	8	95439939	95449180	8	6	0.0144622
321	FAM84B	8	127564682	127570711	8	3	0.0197666		321	CFAP100	3	126113781	126155398	5	0	0.0336538		321	TBL1XR1	3	176737142	176914272	5	0	0.0441176		321	DPY19L4	8	95732102	95806076	8	6	0.0144622
322	POU5F1B	8	128427856	128429455	8	3	0.0197666		322	ZXDC	3	126156443	126194762	5	0	0.0336538		322	ZMAT3	3	178735010	178789656	5	0	0.0441176		322	INTS8	8	95835517	95892721	8	6	0.0144622
323	PTPRD	9	8314245	10612723	4	0	0.0325077		323	CHST13	3	126243130	126262134	5	0	0.0336538		323	PIK3CA	3	178866310	178957881	5	0	0.0441176		323	CCNE2	8	95892451	95907482	8	6	0.0144622
324	LINGO2	9	27948083	29212998	4	0	0.0325077		324	C3orf22	3	126268518	126277808	5	0	0.0336538		324	XXYLT1	3	194789007	194968649	5	0	0.0441176		324	NDUFAF6	8	96037202	96070944	8	6	0.0144622
325	DDX58	9	32455299	32526322	4	0	0.0325077		325	TXNRD3NB	3	126290621	126327398	5	0	0.0336538		325	APOD	3	195295572	195311076	5	0	0.0441176		325	PLEKHF2	8	96145948	96168913	8	6	0.0144622
326	ELAVL2	9	23690101	23821478	4	0	0.0325077		326	C3orf56	3	126911973	126917028	5	0	0.0336538		326	SLC51A	3	195943382	195960301	5	0	0.0441176		326	C8orf37	8	96257140	96281462	8	6	0.0144622
327	LOC100506422	9	26066672	26118406	4	0	0.0325077		327	TPRA1	3	127291906	127309602	5	0	0.0336538		327	RNF168	3	196195653	196230639	5	0	0.0441176		327	GDF6	8	97154560	97173020	8	6	0.0144622
328	CAAP1	9	26840682	26892826	4	0	0.0325077		328	MCM2	3	127317199	127341279	5	0	0.0336538		328	PAK2	3	196466727	196559518	5	0	0.0441176		328	UQCRB	8	97238903	97247862	8	6	0.0144622
329	IFT74	9	26947036	27062931	4	0	0.0325077		329	PODXL2	3	127348001	127391653	5	0	0.0336538		329	SENP5	3	196594726	196661585	5	0	0.0441176		329	PTDSS1	8	97274113	97346780	8	6	0.0144622
330	LRRC19	9	26993133	27005691	4	0	0.0325077		330	ABTB1	3	127391780	127399769	5	0	0.0336538		330	MELTF	3	196728610	196756687	5	0	0.0441176		330	TSPYL5	8	98285713	98290176	8	6	0.0144622
331	TEK	9	27109138	27230176	4	0	0.0325077		331	SEC61A1	3	127771211	127790526	5	0	0.0336538		331	PROS1	3	93591880	93692925	5	0	0.0441176		331	RPL30	8	99053937	99057818	8	6	0.0144622
332	MOB3B	9	27325206	27529850	4	0	0.0325077		332	DNAJB8	3	128181274	128186091	5	0	0.0336538		332	STX19	3	93733212	93747454	5	0	0.0441176		332	RIDA	8	99114566	99129418	8	6	0.0144622
333	UBAP2	9	33921690	34048947	4	0	0.0325077		333	GATA2	3	128198264	128206764	5	0	0.0336538		333	DHFR2	3	93776765	93781831	5	0	0.0441176		333	POP1	8	99129520	99172069	8	6	0.0144622
334	UBAP1	9	34179002	34252521	4	0	0.0325077		334	RPN1	3	128338812	128369719	5	0	0.0336538		334	NSUN3	3	93781854	93845630	5	0	0.0441176		334	KCNS2	8	99439249	99443025	8	6	0.0144622
335	NUDT2	9	34329503	34343711	4	0	0.0325077		335	ACAD9	3	128598332	128631957	5	0	0.0336538		335	NIT2	3	100053561	100074478	5	0	0.0441176		335	OSR2	8	99956630	99964332	8	6	0.0144622
336	DNAI1	9	34458749	34520987	4	0	0.0325077		336	EFCC1	3	128720471	128759585	5	0	0.0336538		336	TOMM70	3	100082302	100120242	5	0	0.0441176		336	COX6C	8	100890222	100906242	8	6	0.0144622
337	IZUMO3	9	24543212	24545674	4	0	0.0325077		337	GP9	3	128779609	128781254	5	0	0.0336538		337	TFG	3	100428133	100467811	5	0	0.0441176		337	FBXO43	8	101145587	101158099	8	6	0.0144622
338	TUSC1	9	25676386	25678856	4	0	0.0325077		338	RAB43	3	128806411	128840647	5	0	0.0336538		338	IMPG2	3	100941389	101039419	5	0	0.0441176		338	POLR2K	8	101162838	101166230	8	6	0.0144622
339	PLAA	9	26903367	26947468	4	0	0.0325077		339	ISY1	3	128846258	128880073	5	0	0.0336538		339	TRMT10C	3	101280679	101285290	5	0	0.0441176		339	ANKRD46	8	101521979	101572014	8	6	0.0144622
340	EQTN	9	27284651	27297137	4	0	0.0325077		340	CNBP	3	128886657	128902810	5	0	0.0336538		340	PCNP	3	101292937	101313309	5	0	0.0441176		340	SNX31	8	101585109	101661893	8	6	0.0144622
341	C9orf72	9	27546543	27573491	4	0	0.0325077		341	HMCES	3	128997683	129024136	5	0	0.0336538		341	ZBTB11	3	101368282	101395988	5	0	0.0441176		341	PABPC1	8	101715143	101734315	8	6	0.0144622
342	ACO1	9	32384600	32450834	4	0	0.0325077		342	H1FX	3	129033613	129035120	5	0	0.0336538		342	RPL24	3	101399933	101405563	5	0	0.0441176		342	YWHAZ	8	101930803	101962799	8	6	0.0144622
343	TOPORS	9	32540541	32552626	4	0	0.0325077		343	EFCAB12	3	129120163	129147494	5	0	0.0336538		343	NXPE3	3	101498028	101547075	5	0	0.0441176		343	ZNF706	8	102209265	102217960	8	6	0.0144622
344	NDUFB6	9	32553523	32573182	4	0	0.0325077		344	MBD4	3	129149786	129159022	5	0	0.0336538		344	NFKBIZ	3	101546833	101579869	5	0	0.0441176		344	CTHRC1	8	104383742	104395233	8	6	0.0144622
345	TAF1L	9	32629451	32635667	4	0	0.0325077		345	RHO	3	129247481	129254187	5	0	0.0336538		345	ZPLD1	3	102153858	102198685	5	0	0.0441176		345	SLC25A32	8	104410865	104427563	8	6	0.0144622
346	TMEM215	9	32783496	32789199	4	0	0.0325077		346	H1FOO	3	129262056	129270310	5	0	0.0336538		346	SOX14	3	137483133	137485176	5	0	0.0441176		346	DCAF13	8	104426941	104455681	8	6	0.0144622
347	APTX	9	32972603	33001574	4	0	0.0325077		347	PLXND1	3	129274055	129325582	5	0	0.0336538		347	CLDN18	3	137717657	137752494	5	0	0.0441176		347	DCSTAMP	8	105352023	105368917	8	6	0.0144622
348	PRSS3	9	33750463	33799229	4	0	0.0325077		348	TRH	3	129693235	129696781	5	0	0.0336538		348	DZIP1L	3	137780826	137834451	5	0	0.0441176		348	DPYS	8	105391651	105479277	8	6	0.0144622
349	UBE2R2	9	33817181	33920401	4	0	0.0325077		349	ALG1L2	3	129800673	129817233	5	0	0.0336538		349	A4GNT	3	137842559	137851229	5	0	0.0441176		349	ABRA	8	107771710	107782472	8	6	0.0144622
350	DCAF12	9	34086380	34126771	4	0	0.0325077		350	ASTE1	3	130732716	130745698	5	0	0.0336538		350	ARMC8	3	137906089	137965729	5	0	0.0441176		350	EIF3E	8	109213971	109260959	8	6	0.0144622
351	KIF24	9	34252377	34329198	4	0	0.0325077		351	NUDT16	3	131100514	131107674	5	0	0.0336538		351	MRAS	3	138066489	138124377	5	0	0.0441176		351	EMC2	8	109455811	109483392	8	6	0.0144622
352	MYORG	9	34366663	34376894	4	0	0.0325077		352	ACPP	3	132036210	132077690	5	0	0.0336538		352	ESYT3	3	138153414	138198784	5	0	0.0441176		352	TMEM74	8	109791204	109799844	8	6	0.0144622
353	C9orf24	9	34379016	34381598	4	0	0.0325077		353	ACAD11	3	132276981	132378975	5	0	0.0336538		353	FAIM	3	138327541	138352218	5	0	0.0441176		353	NUDCD1	8	110253147	110342162	8	6	0.0144622
354	FAM219A	9	34398181	34458568	4	0	0.0325077		354	ACKR4	3	132316080	132321488	5	0	0.0336538		354	FOXL2	3	138663065	138665982	5	0	0.0441176		354	ENY2	8	110346551	110358189	8	6	0.0144622
355	ENHO	9	34521039	34523037	4	0	0.0325077		355	NPHP3	3	132399452	132441303	5	0	0.0336538		355	FOXL2NB	3	138666075	138672830	5	0	0.0441176		355	EBAG9	8	110551928	110578225	8	6	0.0144622
356	CNTFR	9	34551429	34589735	4	0	0.0325077		356	TOPBP1	3	133319448	133380737	5	0	0.0336538		356	PRR23A	3	138722803	138725110	5	0	0.0441176		356	LOC100132813	8	110656343	110660313	8	6	0.0144622
357	GRB2	17	73314156	73401789	4	0	0.0325077		357	TF	3	133464976	133497850	5	0	0.0336538		357	PRR23B	3	138737872	138739768	5	0	0.0441176		357	KCNV1	8	110975873	110988076	8	6	0.0144622
358	UBE2O	17	74385612	74449288	4	0	0.0325077		358	SRPRB	3	133502876	133540336	5	0	0.0336538		358	PRR23C	3	138760943	138763734	5	0	0.0441176		358	UTP23	8	117778741	117786923	8	6	0.0144622
359	SLC25A19	17	73269060	73285530	4	0	0.0325077		359	C3orf36	3	133646988	133648656	5	0	0.0336538		359	COPB2	3	139076432	139108522	5	0	0.0441176		359	RAD21	8	117858172	117887105	8	6	0.0144622
360	PRPSAP1	17	74306816	74350230	4	0	0.0325077		360	ANAPC13	3	134196545	134204831	5	0	0.0336538		360	RBP2	3	139171725	139195352	5	0	0.0441176		360	AARD	8	117950463	117956239	8	6	0.0144622
361	ST6GALNAC2	17	74561460	74582145	4	0	0.0325077		361	MSL2	3	135867759	135913310	5	0	0.0336538		361	RBP1	3	139236275	139258671	5	0	0.0441176		361	MED30	8	118532951	118552501	8	6	0.0144622
362	USP36	17	76791733	76836609	4	0	0.0325077		362	PCCB	3	135969166	136049013	5	0	0.0336538		362	TRIM42	3	140396865	140419992	5	0	0.0441176		362	TNFRSF11B	8	119935795	119964383	8	6	0.0144622
363	SUMO2	17	73163824	73179098	4	0	0.0325077		363	SLC35G2	3	136537860	136574734	5	0	0.0336538		363	SLC25A36	3	140660661	140698785	5	0	0.0441176		363	MAL2	8	120220609	120257913	8	6	0.0144622
364	NUP85	17	73201530	73231854	4	0	0.0325077		364	NCK1	3	136581049	136670452	5	0	0.0336538		364	PXYLP1	3	140950666	141013745	5	0	0.0441176		364	NOV	8	120428551	120436678	8	6	0.0144622
365	GGA3	17	73232686	73257742	4	0	0.0325077		365	SOX14	3	137483133	137485176	5	0	0.0336538		365	PAQR9	3	142680072	142682178	5	0	0.0441176		365	TAF2	8	120743013	120845074	8	6	0.0144622
366	MRPS7	17	73257748	73262457	4	0	0.0325077		366	CLDN18	3	137717657	137752494	5	0	0.0336538		366	CHST2	3	142838617	142842856	5	0	0.0441176		366	MRPL13	8	121408082	121457647	8	6	0.0144622
367	MIF4GD	17	73262308	73267311	4	0	0.0325077		367	DZIP1L	3	137780826	137834451	5	0	0.0336538		367	C3orf58	3	143690639	143711210	5	0	0.0441176		367	HAS2	8	122625270	122653630	8	6	0.0144622
368	SPHK1	17	74380689	74383941	4	0	0.0325077		368	A4GNT	3	137842559	137851229	5	0	0.0336538		368	PLSCR4	3	145910121	145968651	5	0	0.0441176		368	DERL1	8	124025403	124054663	8	6	0.0144622
369	AANAT	17	74449432	74466199	4	0	0.0325077		369	ARMC8	3	137906089	137965729	5	0	0.0336538		369	PLSCR2	3	146151074	146187088	5	0	0.0441176		369	FAM83A	8	124191286	124222319	8	6	0.0144622
370	RHBDF2	17	74466974	74483991	4	0	0.0325077		370	MRAS	3	138066489	138124377	5	0	0.0336538		370	PLSCR1	3	146232966	146262628	5	0	0.0441176		370	C8orf76	8	124232195	124253638	8	6	0.0144622
371	CYGB	17	74523429	74533987	4	0	0.0325077		371	ESYT3	3	138153414	138198784	5	0	0.0336538		371	PLSCR5	3	146294341	146324003	5	0	0.0441176		371	ZHX1	8	124260689	124286727	8	6	0.0144622
372	PRCD	17	74536120	74541458	4	0	0.0325077		372	FOXL2	3	138663065	138665982	5	0	0.0336538		372	ZIC4	3	147103834	147122071	5	0	0.0441176		372	WDYHV1	8	124428964	124454480	8	6	0.0144622
373	ST6GALNAC1	17	74620837	74639920	4	0	0.0325077		373	FOXL2NB	3	138666075	138672830	5	0	0.0336538		373	ZIC1	3	147127180	147134506	5	0	0.0441176		373	KLHL38	8	124657914	124665190	8	6	0.0144622
374	TIMP2	17	76849058	76921472	4	0	0.0325077		374	PRR23A	3	138722803	138725110	5	0	0.0336538		374	AGTR1	3	148415657	148460790	5	0	0.0441176		374	ANXA13	8	124693033	124749666	8	6	0.0144622
375	CEP295NL	17	76886661	76899299	4	0	0.0325077		375	PRR23B	3	138737872	138739768	5	0	0.0336538		375	CPB1	3	148545587	148577974	5	0	0.0441176		375	FAM91A1	8	124780678	124822901	8	6	0.0144622
376	LGALS3BP	17	76967334	76976061	4	0	0.0325077		376	PRR23C	3	138760943	138763734	5	0	0.0336538		376	CPA3	3	148583042	148614878	5	0	0.0441176		376	TMEM65	8	125323158	125384940	8	6	0.0144622
377	CANT1	17	76987797	77005899	4	0	0.0325077		377	COPB2	3	139076432	139108522	5	0	0.0336538		377	GYG1	3	148709194	148745456	5	0	0.0441176		377	TRMT12	8	125463047	125465267	8	6	0.0144622
378	C1QTNF1	17	77019015	77045870	4	0	0.0325077		378	RBP2	3	139171725	139195352	5	0	0.0336538		378	HPS3	3	148847370	148890983	5	0	0.0441176		378	RNF139	8	125487007	125500859	8	6	0.0144622
									379	RBP1	3	139236275	139258671	5	0	0.0336538		379	TM4SF18	3	149036284	149051259	5	0	0.0441176		379	TATDN1	8	125500734	125551329	8	6	0.0144622
									380	TRIM42	3	140396865	140419992	5	0	0.0336538		380	TM4SF1	3	149086804	149095568	5	0	0.0441176		380	NDUFB9	8	125551342	125562227	8	6	0.0144622
									381	SLC25A36	3	140660661	140698785	5	0	0.0336538		381	TM4SF4	3	149192367	149221181	5	0	0.0441176		381	FAM84B	8	127564682	127570711	8	6	0.0144622
									382	PXYLP1	3	140950666	141013745	5	0	0.0336538		382	COMMD2	3	149456256	149470286	5	0	0.0441176		382	POU5F1B	8	128427856	128429455	8	6	0.0144622
									383	RNF7	3	141457050	141465645	5	0	0.0336538		383	ANKUB1	3	149479225	149510610	5	0	0.0441176		383	RALY	20	32581457	32670991	6	3	0.0276776
									384	GRK7	3	141497042	141535892	5	0	0.0336538		384	TMEM183B	3	149699447	149701153	5	0	0.0441176		384	ITCH	20	32951040	33099578	6	3	0.0276776
									385	ATP1B3	3	141595433	141645390	5	0	0.0336538		385	TSC22D2	3	150126121	150177906	5	0	0.0441176		385	PIGU	20	33148345	33265089	6	3	0.0276776
									386	GK5	3	141876368	141944449	5	0	0.0336538		386	SERP1	3	150259779	150264428	5	0	0.0441176		386	EIF2S2	20	32676103	32700162	6	3	0.0276776
									387	PAQR9	3	142680072	142682178	5	0	0.0336538		387	EIF2A	3	150264464	150303803	5	0	0.0441176		387	DYNLRB1	20	33104188	33123391	6	3	0.0276776
									388	CHST2	3	142838617	142842856	5	0	0.0336538		388	ERICH6	3	150377671	150421758	5	0	0.0441176		388	MAP1LC3A	20	33134687	33148149	6	3	0.0276776
									389	C3orf58	3	143690639	143711210	5	0	0.0336538		389	CLRN1	3	150643949	150662023	5	0	0.0441176		389	XPC	3	14186646	14220172	5	2	0.0282761
									390	PLOD2	3	145787226	145879282	5	0	0.0336538		390	GPR171	3	150915618	150920988	5	0	0.0441176		390	LSM3	3	14220227	14239869	5	2	0.0282761
									391	PLSCR4	3	145910121	145968651	5	0	0.0336538		391	GPR87	3	151011873	151034636	5	0	0.0441176		391	SINHCAF	12	31433517	31479121	5	2	0.0282761
									392	PLSCR2	3	146151074	146187088	5	0	0.0336538		392	P2RY13	3	151044095	151047337	5	0	0.0441176		392	BICD1	12	32260184	32531141	5	2	0.0282761
									393	PLSCR1	3	146232966	146262628	5	0	0.0336538		393	P2RY12	3	151054630	151058643	5	0	0.0441176		393	DENND5B	12	31535156	31743376	5	2	0.0282761
									394	PLSCR5	3	146294341	146324003	5	0	0.0336538		394	IGSF10	3	151153777	151158578	5	0	0.0441176		394	AMN1	12	31824070	31882108	5	2	0.0282761
									395	ZIC4	3	147103834	147122071	5	0	0.0336538		395	AADACL2	3	151451703	151475556	5	0	0.0441176		395	KIAA1551	12	32112352	32146041	5	2	0.0282761
									396	ZIC1	3	147127180	147134506	5	0	0.0336538		396	AADAC	3	151531860	151546276	5	0	0.0441176		396	DDX11	12	31226778	31257725	5	2	0.0282761
									397	AGTR1	3	148415657	148460790	5	0	0.0336538		397	SUCNR1	3	151591430	151602407	5	0	0.0441176		397	ETFBKMT	12	31800093	31822016	5	2	0.0282761
									398	CPB1	3	148545587	148577974	5	0	0.0336538		398	P2RY1	3	152552481	152559228	5	0	0.0441176		398	H3F3C	12	31944118	31945175	5	2	0.0282761
									399	CPA3	3	148583042	148614878	5	0	0.0336538		399	RAP2B	3	152880000	152888413	5	0	0.0441176		399	TBC1D16	17	77906141	78009657	5	2	0.0282761
									400	KCNMB3	3	178957536	178984838	5	0	0.0336538		400	C3orf79	3	153202283	153220486	5	0	0.0441176		400	EIF4A3	17	78109012	78120982	5	2	0.0282761
									401	MFN1	3	179065479	179111014	5	0	0.0336538		401	MME	3	154797435	154901518	5	0	0.0441176		401	ENPP7	17	77704864	77716021	5	2	0.0282761
									402	GNB4	3	179113875	179169371	5	0	0.0336538		402	C3orf33	3	155480400	155524076	5	0	0.0441176		402	CBX2	17	77751976	77756331	5	2	0.0282761
									403	ACTL6A	3	179280667	179306193	5	0	0.0336538		403	SLC33A1	3	155544299	155572248	5	0	0.0441176		403	CBX8	17	77768175	77770915	5	2	0.0282761
									404	NDUFB5	3	179322574	179342288	5	0	0.0336538		404	GMPS	3	155588324	155655521	5	0	0.0441176		404	CBX4	17	77806954	77813213	5	2	0.0282761
									405	TTC14	3	180319917	180328918	5	0	0.0336538		405	SSR3	3	156257341	156271914	5	0	0.0441176		405	CCDC40	17	78010430	78043216	5	2	0.0282761
									406	FXR1	3	180630233	180700541	5	0	0.0336538		406	TIPARP	3	156392204	156424559	5	0	0.0441176		406	GAA	17	78075324	78093681	5	2	0.0282761
									407	DNAJC19	3	180701496	180707306	5	0	0.0336538		407	CCNL1	3	156864290	156878549	5	0	0.0441176		407	CARD14	17	78152306	78176430	5	2	0.0282761
									408	SOX2	3	181429711	181432224	5	0	0.0336538		408	SHOX2	3	157813799	157823952	5	0	0.0441176		408	SGSH	17	78183078	78194199	5	2	0.0282761
									409	DCUN1D1	3	182655945	182698389	5	0	0.0336538		409	MLF1	3	158288952	158324249	5	0	0.0441176		409	SLC26A11	17	78194199	78227308	5	2	0.0282761
									410	MCCC1	3	182733005	182817375	5	0	0.0336538		410	GFM1	3	158362316	158410361	5	0	0.0441176		410	ENDOV	17	78388966	78404171	5	2	0.0282761
									411	MAP6D1	3	183533663	183543393	5	0	0.0336538		411	LXN	3	158384202	158390482	5	0	0.0441176		411	NPTX1	17	78440632	78450404	5	2	0.0282761
									412	PARL	3	183547172	183602696	5	0	0.0336538		412	RARRES1	3	158414896	158450275	5	0	0.0441176		412	MYH7B	20	33543637	33590240	5	2	0.0282761
									413	ABCC5	3	183637721	183735748	5	0	0.0336538		413	MFSD1	3	158519714	158547508	5	0	0.0441176		413	MACROD2	20	13976145	16033842	5	2	0.0282761
									414	HTR3D	3	183749331	183757157	5	0	0.0336538		414	IL12A	3	159706622	159713806	5	0	0.0441176		414	ZHX3	20	39807088	39928739	5	2	0.0282761
									415	HTR3C	3	183770834	183778461	5	0	0.0336538		415	C3orf80	3	159943422	159946000	5	0	0.0441176		415	PTPRT	20	40701391	41818557	5	2	0.0282761
									416	HTR3E	3	183814851	183824783	5	0	0.0336538		416	SMC4	3	160117091	160152750	5	0	0.0441176		416	HNF4A	20	42984440	43053276	5	2	0.0282761
									417	EIF2B5	3	183852809	183863099	5	0	0.0336538		417	TRIM59	3	160153290	160167626	5	0	0.0441176		417	HM13	20	30102212	30157370	5	2	0.0282761
									418	DVL3	3	183873283	183891314	5	0	0.0336538		418	KPNA4	3	160212782	160283376	5	0	0.0441176		418	BCL2L1	20	30252254	30310355	5	2	0.0282761
									419	ABCF3	3	183903862	183911795	5	0	0.0336538		419	ARL14	3	160394947	160396236	5	0	0.0441176		419	CDK5RAP1	20	31946644	31989375	5	2	0.0282761
									420	VWA5B2	3	183948216	183960117	5	0	0.0336538		420	B3GALNT1	3	160801670	160822683	5	0	0.0441176		420	CBFA2T2	20	32077927	32237837	5	2	0.0282761
									421	ALG3	3	183960116	183966759	5	0	0.0336538		421	SERPINI2	3	167159576	167191920	5	0	0.0441176		421	ZNF341	20	32319565	32380075	5	2	0.0282761
									422	EEF1AKMT4	3	183967444	183976547	5	0	0.0336538		422	PDCD10	3	167401693	167452594	5	0	0.0441176		422	TOP1	20	39657457	39753127	5	2	0.0282761
									423	EEF1AKMT4-ECE2	3	183967444	184010819	5	0	0.0336538		423	PPP1R2	3	195241217	195270224	5	0	0.0441176		423	LPIN3	20	39969492	39989225	5	2	0.0282761
									424	CAMK2N2	3	183977002	183979251	5	0	0.0336538		424	MUC20	3	195447752	195460424	5	0	0.0441176		424	CHD6	20	40030740	40247133	5	2	0.0282761
									425	ECE2	3	183993798	184010819	5	0	0.0336538		425	MUC4	3	195473635	195538844	5	0	0.0441176		425	SGK2	20	42187634	42214273	5	2	0.0282761
									426	EIF4G1	3	184032282	184053146	5	0	0.0336538		426	TNK2	3	195590234	195619655	5	0	0.0441176		426	MYBL2	20	42295658	42345136	5	2	0.0282761
									427	FAM131A	3	184053716	184064063	5	0	0.0336538		427	TFRC	3	195776154	195808961	5	0	0.0441176		427	TOX2	20	42543491	42698256	5	2	0.0282761
									428	CLCN2	3	184063972	184079439	5	0	0.0336538		428	ZDHHC19	3	195924322	195938300	5	0	0.0441176		428	TTPAL	20	43104525	43123244	5	2	0.0282761
									429	POLR2H	3	184079501	184086383	5	0	0.0336538		429	PCYT1A	3	195964615	196014623	5	0	0.0441176		429	ADA	20	43248159	43280399	5	2	0.0282761
									430	THPO	3	184089722	184095996	5	0	0.0336538		430	TCTEX1D2	3	196018089	196045165	5	0	0.0441176		430	RIMS4	20	43380444	43438979	5	2	0.0282761
									431	CHRD	3	184097860	184107623	5	0	0.0336538		431	TM4SF19	3	196050416	196065291	5	0	0.0441176		431	YWHAB	20	43514239	43537173	5	2	0.0282761
									432	MAGEF1	3	184428154	184429836	5	0	0.0336538		432	SMCO1	3	196233747	196242237	5	0	0.0441176		432	STK4	20	43595114	43708618	5	2	0.0282761
									433	TMEM41A	3	185207388	185216845	5	0	0.0336538		433	WDR53	3	196281047	196295545	5	0	0.0441176		433	EPPIN-WFDC6	20	44164918	44176065	5	2	0.0282761
									434	LIPH	3	185225569	185270369	5	0	0.0336538		434	FBXO45	3	196295724	196315930	5	0	0.0441176		434	EPPIN	20	44169264	44176065	5	2	0.0282761
									435	TRA2B	3	185632355	185655924	5	0	0.0336538		435	NRROS	3	196366566	196388875	5	0	0.0441176		435	DNTTIP1	20	44420575	44440066	5	2	0.0282761
									436	ETV5	3	185764105	185826901	5	0	0.0336538		436	CEP19	3	196433147	196439165	5	0	0.0441176		436	PCIF1	20	44563316	44576662	5	2	0.0282761
									437	CRYGS	3	186256227	186262240	5	0	0.0336538		437	PIGX	3	196439244	196462878	5	0	0.0441176		437	REM1	20	30063090	30072708	5	2	0.0282761
									438	TBCCD1	3	186263855	186285143	5	0	0.0336538		438	NCBP2	3	196662272	196669311	5	0	0.0441176		438	ID1	20	30193085	30194318	5	2	0.0282761
									439	DNAJB11	3	186288464	186303589	5	0	0.0336538		439	PIGZ	3	196673213	196695742	5	0	0.0441176		439	COX4I2	20	30225690	30232800	5	2	0.0282761
									440	AHSG	3	186330849	186339107	5	0	0.0336538		440	MMD	17	53469973	53499341	5	0	0.0441176		440	SNTA1	20	31995762	32031698	5	2	0.0282761
									441	FETUB	3	186358148	186370797	5	0	0.0336538		441	HLF	17	53342320	53402426	5	0	0.0441176		441	NECAB3	20	32244892	32262264	5	2	0.0282761
									442	KNG1	3	186435097	186460683	5	0	0.0336538		442	KIF2B	17	51900238	51902573	5	0	0.0441176		442	C20orf144	20	32250091	32251721	5	2	0.0282761
									443	EIF4A2	3	186501360	186507686	5	0	0.0336538		443	MKL1	22	40806284	41032723	5	0	0.0441176		443	ACTL10	20	32254303	32256331	5	2	0.0282761
									444	ADIPOQ	3	186560462	186576252	5	0	0.0336538		444	MAPK1	22	22113945	22221970	5	0	0.0441176		444	E2F1	20	32263291	32274210	5	2	0.0282761
									445	RPL39L	3	186838740	186857263	5	0	0.0336538		445	PPM1F	22	22273791	22307250	5	0	0.0441176		445	PXMP4	20	32290549	32308136	5	2	0.0282761
									446	RTP1	3	186915273	186919253	5	0	0.0336538		446	AIFM3	22	21319417	21335649	5	0	0.0441176		446	CHMP4B	20	32399109	32442173	5	2	0.0282761
									447	MASP1	3	186933872	187009810	5	0	0.0336538		447	LZTR1	22	21336557	21353326	5	0	0.0441176		447	GGT7	20	33432522	33460661	5	2	0.0282761
									448	RTP4	3	187086167	187089372	5	0	0.0336538		448	THAP7	22	21354060	21356404	5	0	0.0441176		448	ACSS2	20	33462765	33515769	5	2	0.0282761
									449	SST	3	187386693	187388201	5	0	0.0336538		449	P2RX6	22	21369441	21382302	5	0	0.0441176		449	GSS	20	33516235	33543438	5	2	0.0282761
									450	RTP2	3	187416046	187420345	5	0	0.0336538		450	SLC7A4	22	21383006	21386847	5	0	0.0441176		450	TRPC4AP	20	33590206	33680618	5	2	0.0282761
									451	BCL6	3	187439164	187452695	5	0	0.0336538		451	LRRC74B	22	21400248	21418457	5	0	0.0441176		451	PLCG1	20	39766160	39804357	5	2	0.0282761
									452	CLDN1	3	190023489	190040235	5	0	0.0336538		452	RIMBP3B	22	21738039	21743458	5	0	0.0441176		452	EMILIN3	20	39988605	39995498	5	2	0.0282761
									453	CLDN16	3	190105660	190129932	5	0	0.0336538		453	HIC2	22	21771692	21805752	5	0	0.0441176		453	SRSF6	20	42086503	42092245	5	2	0.0282761
									454	TMEM207	3	190146443	190167665	5	0	0.0336538		454	TMEM191C	22	21821458	21824224	5	0	0.0441176		454	L3MBTL1	20	42136319	42170535	5	2	0.0282761
									455	UTS2B	3	190984943	191048325	5	0	0.0336538		455	RIMBP3C	22	21899954	21905750	5	0	0.0441176		455	IFT52	20	42219252	42275936	5	2	0.0282761
									456	PYDC2	3	191178951	191179245	5	0	0.0336538		456	UBE2L3	22	21903735	21978323	5	0	0.0441176		456	GTSF1L	20	42354800	42355642	5	2	0.0282761
									457	HRASLS	3	192958916	192988644	5	0	0.0336538		457	YDJC	22	21982377	21984340	5	0	0.0441176		457	JPH2	20	42740336	42816218	5	2	0.0282761
									458	TMEM44	3	194308401	194354150	5	0	0.0336538		458	CCDC116	22	21987085	21990091	5	0	0.0441176		458	OSER1	20	42824578	42839546	5	2	0.0282761
									459	FAM43A	3	194406621	194409766	5	0	0.0336538		459	SDF2L1	22	21996541	21998588	5	0	0.0441176		459	GDAP1L1	20	42875738	42909557	5	2	0.0282761
									460	PPP1R2	3	195241217	195270224	5	0	0.0336538		460	PPIL2	22	22020272	22052202	5	0	0.0441176		460	FITM2	20	42931477	42939892	5	2	0.0282761
									461	MUC20	3	195447752	195460424	5	0	0.0336538		461	YPEL1	22	22051824	22090123	5	0	0.0441176		461	R3HDML	20	42965797	42979432	5	2	0.0282761
									462	MUC4	3	195473635	195538844	5	0	0.0336538		462	TOP3B	22	22311396	22337240	5	0	0.0441176		462	SERINC3	20	43124861	43150757	5	2	0.0282761
									463	TNK2	3	195590234	195619655	5	0	0.0336538		463	IGLL1	22	23915311	23922495	5	0	0.0441176		463	PKIG	20	43160421	43247678	5	2	0.0282761
									464	TFRC	3	195776154	195808961	5	0	0.0336538		464	DRICH1	22	23950638	23974508	5	0	0.0441176		464	WISP2	20	43343484	43356453	5	2	0.0282761
									465	ZDHHC19	3	195924322	195938300	5	0	0.0336538		465	RGL4	22	24033047	24041363	5	0	0.0441176		465	KCNK15	20	43374487	43380954	5	2	0.0282761
									466	PCYT1A	3	195964615	196014623	5	0	0.0336538		466	SUSD2	22	24577443	24585074	5	0	0.0441176		466	PABPC1L	20	43538700	43567958	5	2	0.0282761
									467	TCTEX1D2	3	196018089	196045165	5	0	0.0336538		467	GGT5	22	24615621	24641110	5	0	0.0441176		467	TOMM34	20	43570770	43589114	5	2	0.0282761
									468	TM4SF19	3	196050416	196065291	5	0	0.0336538		468	MCHR1	22	41075181	41078818	5	0	0.0441176		468	KCNS1	20	43719854	43729753	5	2	0.0282761
									469	SMCO1	3	196233747	196242237	5	0	0.0336538											469	WFDC5	20	43738092	43743813	5	2	0.0282761
									470	WDR53	3	196281047	196295545	5	0	0.0336538											470	WFDC12	20	43752066	43753106	5	2	0.0282761
									471	FBXO45	3	196295724	196315930	5	0	0.0336538											471	PI3	20	43803539	43805185	5	2	0.0282761
									472	NRROS	3	196366566	196388875	5	0	0.0336538											472	SEMG1	20	43835604	43838414	5	2	0.0282761
									473	CEP19	3	196433147	196439165	5	0	0.0336538											473	SEMG2	20	43850009	43853099	5	2	0.0282761
									474	PIGX	3	196439244	196462878	5	0	0.0336538											474	SLPI	20	43880879	43883205	5	2	0.0282761
									475	NCBP2	3	196662272	196669311	5	0	0.0336538											475	MATN4	20	43922085	43936937	5	2	0.0282761
									476	PIGZ	3	196673213	196695742	5	0	0.0336538											476	RBPJL	20	43935482	43946464	5	2	0.0282761
									477	ANKRD18B	9	33524410	33573001	5	0	0.0336538											477	SDC4	20	43953927	43977064	5	2	0.0282761
									478	DNAJA1	9	33025200	33039905	5	0	0.0336538											478	SYS1	20	43990576	43997862	5	2	0.0282761
									479	B4GALT1	9	33110638	33167356	5	0	0.0336538											479	TP53TG5	20	44002519	44006957	5	2	0.0282761
									480	NFX1	9	33290414	33348721	5	0	0.0336538											480	DBNDD2	20	44034632	44039250	5	2	0.0282761
									481	SMU1	9	33041849	33076714	5	0	0.0336538											481	PIGT	20	44044706	44054885	5	2	0.0282761
									482	SPINK4	9	33240161	33248565	5	0	0.0336538											482	WFDC2	20	44098393	44110172	5	2	0.0282761
									483	BAG1	9	33252468	33264759	5	0	0.0336538											483	SPINT3	20	44141100	44144264	5	2	0.0282761
									484	CHMP5	9	33264876	33282067	5	0	0.0336538											484	WFDC6	20	44162835	44168134	5	2	0.0282761
									485	AQP7	9	33384947	33402680	5	0	0.0336538											485	WFDC8	20	44179790	44207965	5	2	0.0282761
									486	AQP3	9	33441151	33447631	5	0	0.0336538											486	WFDC9	20	44236577	44259907	5	2	0.0282761
									487	NOL6	9	33461350	33473941	5	0	0.0336538											487	WFDC10A	20	44258384	44259831	5	2	0.0282761
									488	SINHCAF	12	31433517	31479121	5	0	0.0336538											488	WFDC11	20	44277201	44298878	5	2	0.0282761
									489	BICD1	12	32260184	32531141	5	0	0.0336538											489	WFDC10B	20	44313289	44333658	5	2	0.0282761
									490	DENND5B	12	31535156	31743376	5	0	0.0336538											490	WFDC13	20	44330654	44337456	5	2	0.0282761
									491	AMN1	12	31824070	31882108	5	0	0.0336538											491	SPINT4	20	44350973	44354469	5	2	0.0282761
									492	KIAA1551	12	32112352	32146041	5	0	0.0336538											492	WFDC3	20	44402846	44420547	5	2	0.0282761
									493	DDX11	12	31226778	31257725	5	0	0.0336538											493	UBE2C	20	44441214	44445596	5	2	0.0282761
									494	ETFBKMT	12	31800093	31822016	5	0	0.0336538											494	TNNC2	20	44451852	44455953	5	2	0.0282761
									495	H3F3C	12	31944118	31945175	5	0	0.0336538											495	SNX21	20	44462469	44471914	5	2	0.0282761
									496	MYH7B	20	33543637	33590240	5	0	0.0336538											496	ACOT8	20	44470359	44486048	5	2	0.0282761
									497	MACROD2	20	13976145	16033842	5	0	0.0336538											497	ZSWIM3	20	44486219	44507770	5	2	0.0282761
									498	ZHX3	20	39807088	39928739	5	0	0.0336538											498	ZSWIM1	20	44509847	44513905	5	2	0.0282761
									499	PTPRT	20	40701391	41818557	5	0	0.0336538											499	SPATA25	20	44515129	44516238	5	2	0.0282761
									500	HNF4A	20	42984440	43053276	5	0	0.0336538											500	NEURL2	20	44517110	44519926	5	2	0.0282761
									501	NCOA3	20	46130600	46285621	5	0	0.0336538											501	CTSA	20	44518782	44527459	5	2	0.0282761
									502	HM13	20	30102212	30157370	5	0	0.0336538											502	PLTP	20	44527258	44539633	5	2	0.0282761
									503	BCL2L1	20	30252254	30310355	5	0	0.0336538											503	ZNF335	20	44577291	44600833	5	2	0.0282761
									504	CDK5RAP1	20	31946644	31989375	5	0	0.0336538											504	MMP9	20	44637546	44645200	5	2	0.0282761
									505	CBFA2T2	20	32077927	32237837	5	0	0.0336538											505	SLC12A5	20	44650328	44688789	5	2	0.0282761
									506	ZNF341	20	32319565	32380075	5	0	0.0336538											506	ERRFI1	1	8071778	8086393	3	0	0.0323077
									507	TOP1	20	39657457	39753127	5	0	0.0336538											507	GRM8	7	126078651	126883569	3	0	0.0323077
									508	LPIN3	20	39969492	39989225	5	0	0.0336538											508	ATP6V0A4	7	138391038	138482941	3	0	0.0323077
									509	CHD6	20	40030740	40247133	5	0	0.0336538											509	KIAA1549	7	138516125	138666064	3	0	0.0323077
									510	SGK2	20	42187634	42214273	5	0	0.0336538											510	UBN2	7	138916230	138992982	3	0	0.0323077
									511	MYBL2	20	42295658	42345136	5	0	0.0336538											511	LUC7L2	7	139025104	139108203	3	0	0.0323077
									512	TOX2	20	42543491	42698256	5	0	0.0336538											512	C7orf55-LUC7L2	7	139025877	139108203	3	0	0.0323077
									513	TTPAL	20	43104525	43123244	5	0	0.0336538											513	PRKAG2	7	151253199	151329344	3	0	0.0323077
									514	ADA	20	43248159	43280399	5	0	0.0336538											514	GALNT11	7	151722758	151819432	3	0	0.0323077
									515	RIMS4	20	43380444	43438979	5	0	0.0336538											515	KLF14	7	130417381	130418860	3	0	0.0323077
									516	YWHAB	20	43514239	43537173	5	0	0.0336538											516	TMEM213	7	138482738	138490769	3	0	0.0323077
									517	STK4	20	43595114	43708618	5	0	0.0336538											517	ZC3HAV1L	7	138710451	138720775	3	0	0.0323077
									518	EPPIN-WFDC6	20	44164918	44176065	5	0	0.0336538											518	ZC3HAV1	7	138728265	138794465	3	0	0.0323077
									519	EPPIN	20	44169264	44176065	5	0	0.0336538											519	TTC26	7	138818489	138846089	3	0	0.0323077
									520	DNTTIP1	20	44420575	44440066	5	0	0.0336538											520	FMC1	7	139025877	139031065	3	0	0.0323077
									521	PCIF1	20	44563316	44576662	5	0	0.0336538											521	GALNTL5	7	151653463	151717019	3	0	0.0323077
									522	NCOA5	20	44689623	44718580	5	0	0.0336538											522	BNC2	9	16409500	16870786	3	0	0.0323077
									523	CDH22	20	44802371	44937137	5	0	0.0336538											523	SMARCA2	9	2015218	2193624	3	0	0.0323077
									524	SLC13A3	20	45186461	45280100	5	0	0.0336538											524	GLIS3	9	3824127	4300035	3	0	0.0323077
									525	SLC2A10	20	45338278	45364986	5	0	0.0336538											525	ZDHHC21	9	14611068	14693480	3	0	0.0323077
									526	EYA2	20	45523262	45817492	5	0	0.0336538											526	CCDC171	9	15553004	15974037	3	0	0.0323077
									527	ZMYND8	20	45837858	45985633	5	0	0.0336538											527	ADAMTSL1	9	18474078	18910948	3	0	0.0323077
									528	REM1	20	30063090	30072708	5	0	0.0336538											528	FOCAD	9	20658307	20995954	3	0	0.0323077
									529	ID1	20	30193085	30194318	5	0	0.0336538											529	C9orf3	9	97488950	97695955	3	0	0.0323077
									530	COX4I2	20	30225690	30232800	5	0	0.0336538											530	DOCK8	9	214864	465259	3	0	0.0323077
									531	SNTA1	20	31995762	32031698	5	0	0.0336538											531	KANK1	9	470293	746106	3	0	0.0323077
									532	NECAB3	20	32244892	32262264	5	0	0.0336538											532	DMRT1	9	841689	969090	3	0	0.0323077
									533	C20orf144	20	32250091	32251721	5	0	0.0336538											533	RFX3	9	3218296	3526001	3	0	0.0323077
									534	ACTL10	20	32254303	32256331	5	0	0.0336538											534	AK3	9	4709555	4726227	3	0	0.0323077
									535	E2F1	20	32263291	32274210	5	0	0.0336538											535	RCL1	9	4792833	4861077	3	0	0.0323077
									536	PXMP4	20	32290549	32308136	5	0	0.0336538											536	JAK2	9	4985085	5128183	3	0	0.0323077
									537	CHMP4B	20	32399109	32442173	5	0	0.0336538											537	PLGRKT	9	5357965	5437937	3	0	0.0323077
									538	GGT7	20	33432522	33460661	5	0	0.0336538											538	RIC1	9	5629118	5769454	3	0	0.0323077
									539	ACSS2	20	33462765	33515769	5	0	0.0336538											539	MLANA	9	5890908	5909822	3	0	0.0323077
									540	GSS	20	33516235	33543438	5	0	0.0336538											540	UHRF2	9	6413150	6507054	3	0	0.0323077
									541	TRPC4AP	20	33590206	33680618	5	0	0.0336538											541	GLDC	9	6532463	6645692	3	0	0.0323077
									542	PLCG1	20	39766160	39804357	5	0	0.0336538											542	KDM4C	9	6720862	7077264	3	0	0.0323077
									543	EMILIN3	20	39988605	39995498	5	0	0.0336538											543	MPDZ	9	13105702	13279563	3	0	0.0323077
									544	SRSF6	20	42086503	42092245	5	0	0.0336538											544	NFIB	9	14081841	14180801	3	0	0.0323077
									545	L3MBTL1	20	42136319	42170535	5	0	0.0336538											545	FREM1	9	14734663	14910993	3	0	0.0323077
									546	IFT52	20	42219252	42275936	5	0	0.0336538											546	TTC39B	9	15170841	15250198	3	0	0.0323077
									547	GTSF1L	20	42354800	42355642	5	0	0.0336538											547	PSIP1	9	15464063	15511017	3	0	0.0323077
									548	JPH2	20	42740336	42816218	5	0	0.0336538											548	C9orf92	9	16203932	16253105	3	0	0.0323077
									549	OSER1	20	42824578	42839546	5	0	0.0336538											549	CNTLN	9	17134988	17503921	3	0	0.0323077
									550	GDAP1L1	20	42875738	42909557	5	0	0.0336538											550	SH3GL2	9	17578951	17797127	3	0	0.0323077
									551	FITM2	20	42931477	42939892	5	0	0.0336538											551	SAXO1	9	18927657	19033256	3	0	0.0323077
									552	R3HDML	20	42965797	42979432	5	0	0.0336538											552	DENND4C	9	19230487	19374266	3	0	0.0323077
									553	SERINC3	20	43124861	43150757	5	0	0.0336538											553	SLC24A2	9	19507449	19787017	3	0	0.0323077
									554	PKIG	20	43160421	43247678	5	0	0.0336538											554	MLLT3	9	20341662	20621986	3	0	0.0323077
									555	WISP2	20	43343484	43356453	5	0	0.0336538											555	IFNK	9	27524311	27526496	3	0	0.0323077
									556	KCNK15	20	43374487	43380954	5	0	0.0336538											556	DNAJB5	9	34989637	34998430	3	0	0.0323077
									557	PABPC1L	20	43538700	43567958	5	0	0.0336538											557	UNC13B	9	35161965	35405335	3	0	0.0323077
									558	TOMM34	20	43570770	43589114	5	0	0.0336538											558	RUSC2	9	35489829	35561895	3	0	0.0323077
									559	KCNS1	20	43719854	43729753	5	0	0.0336538											559	RECK	9	36036909	36086281	3	0	0.0323077
									560	WFDC5	20	43738092	43743813	5	0	0.0336538											560	PAX5	9	36833271	37034476	3	0	0.0323077
									561	WFDC12	20	43752066	43753106	5	0	0.0336538											561	ZCCHC7	9	37120468	37358146	3	0	0.0323077
									562	PI3	20	43803539	43805185	5	0	0.0336538											562	POLR1E	9	37485931	37503694	3	0	0.0323077
									563	SEMG1	20	43835604	43838414	5	0	0.0336538											563	SHB	9	37915894	38069210	3	0	0.0323077
									564	SEMG2	20	43850009	43853099	5	0	0.0336538											564	CNTNAP3	9	39072763	39288300	3	0	0.0323077
									565	SLPI	20	43880879	43883205	5	0	0.0336538											565	ANKRD20A3	9	43089971	43133510	3	0	0.0323077
									566	MATN4	20	43922085	43936937	5	0	0.0336538											566	CNTNAP3B	9	43684884	43922476	3	0	0.0323077
									567	RBPJL	20	43935482	43946464	5	0	0.0336538											567	FBP1	9	97365414	97401923	3	0	0.0323077
									568	SDC4	20	43953927	43977064	5	0	0.0336538											568	ZNF618	9	116638561	116818875	3	0	0.0323077
									569	SYS1	20	43990576	43997862	5	0	0.0336538											569	COL27A1	9	116917824	117074796	3	0	0.0323077
									570	TP53TG5	20	44002519	44006957	5	0	0.0336538											570	WHRN	9	117164359	117265495	3	0	0.0323077
									571	DBNDD2	20	44034632	44039250	5	0	0.0336538											571	C9orf66	9	213107	215893	3	0	0.0323077
									572	PIGT	20	44044706	44054885	5	0	0.0336538											572	DMRT3	9	976967	991732	3	0	0.0323077
									573	WFDC2	20	44098393	44110172	5	0	0.0336538											573	DMRT2	9	1050345	1057554	3	0	0.0323077
									574	SPINT3	20	44141100	44144264	5	0	0.0336538											574	VLDLR	9	2621773	2656103	3	0	0.0323077
									575	WFDC6	20	44162835	44168134	5	0	0.0336538											575	KCNV2	9	2717525	2730037	3	0	0.0323077
									576	WFDC8	20	44179790	44207965	5	0	0.0336538											576	PUM3	9	2804151	2844130	3	0	0.0323077
									577	WFDC9	20	44236577	44259907	5	0	0.0336538											577	SLC1A1	9	4490426	4587469	3	0	0.0323077
									578	WFDC10A	20	44258384	44259831	5	0	0.0336538											578	SPATA6L	9	4598315	4666674	3	0	0.0323077
									579	WFDC11	20	44277201	44298878	5	0	0.0336538											579	PLPP6	9	4662293	4665274	3	0	0.0323077
									580	WFDC10B	20	44313289	44333658	5	0	0.0336538											580	CDC37L1	9	4679552	4708399	3	0	0.0323077
									581	WFDC13	20	44330654	44337456	5	0	0.0336538											581	INSL6	9	5163862	5185618	3	0	0.0323077
									582	SPINT4	20	44350973	44354469	5	0	0.0336538											582	INSL4	9	5231418	5233967	3	0	0.0323077
									583	WFDC3	20	44402846	44420547	5	0	0.0336538											583	RLN2	9	5299863	5304228	3	0	0.0323077
									584	UBE2C	20	44441214	44445596	5	0	0.0336538											584	RLN1	9	5334931	5339873	3	0	0.0323077
									585	TNNC2	20	44451852	44455953	5	0	0.0336538											585	CD274	9	5450502	5463238	3	0	0.0323077
									586	SNX21	20	44462469	44471914	5	0	0.0336538											586	PDCD1LG2	9	5510544	5571282	3	0	0.0323077
									587	ACOT8	20	44470359	44486048	5	0	0.0336538											587	ERMP1	9	5784571	5833081	3	0	0.0323077
									588	ZSWIM3	20	44486219	44507770	5	0	0.0336538											588	KIAA2026	9	5919007	6008003	3	0	0.0323077
									589	ZSWIM1	20	44509847	44513905	5	0	0.0336538											589	RANBP6	9	6011018	6015640	3	0	0.0323077
									590	SPATA25	20	44515129	44516238	5	0	0.0336538											590	IL33	9	6215148	6257983	3	0	0.0323077
									591	NEURL2	20	44517110	44519926	5	0	0.0336538											591	TPD52L3	9	6328348	6330920	3	0	0.0323077
									592	CTSA	20	44518782	44527459	5	0	0.0336538											592	DMAC1	9	7796489	7799806	3	0	0.0323077
									593	PLTP	20	44527258	44539633	5	0	0.0336538											593	TYRP1	9	12693385	12710266	3	0	0.0323077
									594	ZNF335	20	44577291	44600833	5	0	0.0336538											594	LURAP1L	9	12775011	12823059	3	0	0.0323077
									595	MMP9	20	44637546	44645200	5	0	0.0336538											595	CER1	9	14719730	14722715	3	0	0.0323077
									596	SLC12A5	20	44650328	44688789	5	0	0.0336538											596	SNAPC3	9	15422781	15461627	3	0	0.0323077
									597	CD40	20	44746892	44758384	5	0	0.0336538											597	RRAGA	9	19049371	19051023	3	0	0.0323077
									598	SLC35C2	20	44978166	44993097	5	0	0.0336538											598	HAUS6	9	19053134	19102940	3	0	0.0323077
									599	ELMO2	20	44994683	45035690	5	0	0.0336538											599	PLIN2	9	19115758	19127604	3	0	0.0323077
									600	ZNF334	20	45128268	45142198	5	0	0.0336538											600	RPS6	9	19376253	19380235	3	0	0.0323077
									601	OCSTAMP	20	45169669	45179213	5	0	0.0336538											601	ACER2	9	19408924	19452500	3	0	0.0323077
									602	TP53RK	20	45313003	45318276	5	0	0.0336538											602	HACD4	9	21003619	21031458	3	0	0.0323077
									603	ALCAM	3	105085556	105244231	7	1	0.0405594											603	IFNB1	9	21077103	21077962	3	0	0.0323077
									604	CBLB	3	105374304	105586435	7	1	0.0405594											604	IFNW1	9	21140630	21141900	3	0	0.0323077
																											605	IFNA21	9	21165635	21166659	3	0	0.0323077
																											606	IFNA4	9	21186616	21187598	3	0	0.0323077
																											607	IFNA7	9	21201467	21202204	3	0	0.0323077
																											608	IFNA10	9	21206179	21207142	3	0	0.0323077
																											609	IFNA16	9	21216371	21217310	3	0	0.0323077
																											610	IFNA17	9	21227241	21228221	3	0	0.0323077
																											611	IFNA14	9	21239200	21239978	3	0	0.0323077
																											612	IFNA5	9	21304612	21305312	3	0	0.0323077
																											613	KLHL9	9	21329669	21335431	3	0	0.0323077
																											614	IFNA6	9	21350316	21350886	3	0	0.0323077
																											615	IFNA13	9	21367370	21368075	3	0	0.0323077
																											616	IFNA2	9	21384253	21385396	3	0	0.0323077
																											617	IFNA8	9	21409145	21410184	3	0	0.0323077
																											618	IFNA1	9	21440452	21441315	3	0	0.0323077
																											619	IFNE	9	21480837	21482312	3	0	0.0323077
																											620	MTAP	9	21802634	21865970	3	0	0.0323077
																											621	CDKN2A	9	21967750	21974826	3	0	0.0323077
																											622	CDKN2B	9	22002901	22009312	3	0	0.0323077
																											623	DMRTA1	9	22446839	22452472	3	0	0.0323077
																											624	RPP25L	9	34610481	34612110	3	0	0.0323077
																											625	DCTN3	9	34613541	34620520	3	0	0.0323077
																											626	ARID3C	9	34621454	34628011	3	0	0.0323077
																											627	SIGMAR1	9	34634718	34637823	3	0	0.0323077
																											628	GALT	9	34646585	34650595	3	0	0.0323077
																											629	IL11RA	9	34652181	34661899	3	0	0.0323077
																											630	CCL27	9	34661879	34662689	3	0	0.0323077
																											631	LOC730098	9	34664159	34666053	3	0	0.0323077
																											632	CCL19	9	34689566	34691274	3	0	0.0323077
																											633	CCL21	9	34709001	34710164	3	0	0.0323077
																											634	FAM205A	9	34723049	34729535	3	0	0.0323077
																											635	FAM205C	9	34889060	34895775	3	0	0.0323077
																											636	PHF24	9	34957483	34982541	3	0	0.0323077
																											637	C9orf131	9	35041091	35045988	3	0	0.0323077
																											638	VCP	9	35056064	35072739	3	0	0.0323077
																											639	FANCG	9	35073834	35080013	3	0	0.0323077
																											640	PIGO	9	35088684	35096546	3	0	0.0323077
																											641	STOML2	9	35099772	35103192	3	0	0.0323077
																											642	FAM214B	9	35104117	35111371	3	0	0.0323077
																											643	FAM166B	9	35561826	35563896	3	0	0.0323077
																											644	TESK1	9	35605280	35610038	3	0	0.0323077
																											645	CD72	9	35609975	35618424	3	0	0.0323077
																											646	SIT1	9	35649294	35650947	3	0	0.0323077
																											647	CCDC107	9	35658286	35661500	3	0	0.0323077
																											648	ARHGEF39	9	35659340	35665278	3	0	0.0323077
																											649	CA9	9	35673914	35681156	3	0	0.0323077
																											650	TPM2	9	35681989	35690053	3	0	0.0323077
																											651	TLN1	9	35697333	35732392	3	0	0.0323077
																											652	CREB3	9	35732316	35737005	3	0	0.0323077
																											653	GBA2	9	35736858	35749233	3	0	0.0323077
																											654	RGP1	9	35749276	35753264	3	0	0.0323077
																											655	MSMP	9	35752986	35754274	3	0	0.0323077
																											656	NPR2	9	35792405	35809728	3	0	0.0323077
																											657	SPAG8	9	35807781	35812259	3	0	0.0323077
																											658	HINT2	9	35812956	35815042	3	0	0.0323077
																											659	FAM221B	9	35817013	35828744	3	0	0.0323077
																											660	TMEM8B	9	35829221	35847232	3	0	0.0323077
																											661	OR13J1	9	35869459	35870398	3	0	0.0323077
																											662	HRCT1	9	35906188	35907138	3	0	0.0323077
																											663	SPAAR	9	35909479	35911617	3	0	0.0323077
																											664	OR2S2	9	35957104	35958151	3	0	0.0323077
																											665	GLIPR2	9	36136532	36163910	3	0	0.0323077
																											666	CCIN	9	36169388	36171331	3	0	0.0323077
																											667	CLTA	9	36190852	36212059	3	0	0.0323077
																											668	GNE	9	36214437	36258496	3	0	0.0323077
																											669	RNF38	9	36336396	36400296	3	0	0.0323077
																											670	MELK	9	36572858	36677680	3	0	0.0323077
																											671	GRHPR	9	37422706	37436986	3	0	0.0323077
																											672	ZBTB5	9	37438098	37465407	3	0	0.0323077
																											673	FBXO10	9	37510888	37576250	3	0	0.0323077
																											674	TOMM5	9	37588409	37592636	3	0	0.0323077
																											675	FRMPD1	9	37651051	37746901	3	0	0.0323077
																											676	TRMT10B	9	37753799	37778969	3	0	0.0323077
																											677	EXOSC3	9	37779710	37785089	3	0	0.0323077
																											678	DCAF10	9	37800550	37867666	3	0	0.0323077
																											679	SLC25A51	9	37887593	37904350	3	0	0.0323077
																											680	ALDH1B1	9	38392660	38398662	3	0	0.0323077
																											681	IGFBPL1	9	38406524	38424444	3	0	0.0323077
																											682	ANKRD18A	9	38571360	38620657	3	0	0.0323077
																											683	SPATA31A1	9	39355665	39361959	3	0	0.0323077
																											684	SPATA31A3	9	40700290	40706537	3	0	0.0323077
																											685	ZNF658	9	40771411	40792116	3	0	0.0323077
																											686	SPATA31A5	9	41500678	41506925	3	0	0.0323077
																											687	ANKRD20A2	9	42368302	42411410	3	0	0.0323077
																											688	SPATA31A6	9	43624501	43630730	3	0	0.0323077
																											689	FBP2	9	97320995	97356114	3	0	0.0323077
																											690	AMBP	9	116822406	116840752	3	0	0.0323077
																											691	KIF12	9	116853917	116861337	3	0	0.0323077
																											692	ORM1	9	117085302	117088759	3	0	0.0323077
																											693	ORM2	9	117092068	117095536	3	0	0.0323077
																											694	AKNA	9	117098406	117150243	3	0	0.0323077
																											695	ATP6V1G1	9	117349993	117361152	3	0	0.0323077
																											696	TMEM268	9	117373599	117408704	3	0	0.0323077
																											697	SLC22A9	11	63137260	63177731	3	0	0.0323077
																											698	RARRES3	11	63304272	63313930	3	0	0.0323077
																											699	ATL3	11	63391553	63439202	3	0	0.0323077
																											700	SLC22A10	11	63057429	63079246	3	0	0.0323077
																											701	HRASLS5	11	63228875	63258680	3	0	0.0323077
																											702	LGALS12	11	63273523	63284246	3	0	0.0323077
																											703	HRASLS2	11	63320241	63330855	3	0	0.0323077
																											704	PLA2G16	11	63341933	63381909	3	0	0.0323077
																											705	RTN3	11	63448921	63527363	3	0	0.0323077
																											706	C11orf95	11	63527363	63536113	3	0	0.0323077
																											707	SPINDOC	11	63580845	63595190	3	0	0.0323077
																											708	MARK2	11	63606399	63678492	3	0	0.0323077
																											709	RCOR2	11	63678692	63684316	3	0	0.0323077
																											710	UBAC2	13	99852678	100038753	3	0	0.0323077
																											711	GPR18	13	99906966	99910682	3	0	0.0323077
																											712	GPR183	13	99946788	99959749	3	0	0.0323077
																											713	FBF1	17	73905654	73934313	3	0	0.0323077
																											714	WBP2	17	73841779	73851501	3	0	0.0323077
																											715	TRIM47	17	73870244	73874656	3	0	0.0323077
																											716	TRIM65	17	73885040	73893084	3	0	0.0323077
																											717	MRPL38	17	73894723	73901181	3	0	0.0323077
																											718	ACOX1	17	73937587	73975515	3	0	0.0323077
																											719	AGPS	2	178257470	178408564	4	1	0.0344786
																											720	NRBP1	2	27650656	27665126	4	1	0.0344786
																											721	NFE2L2	2	178095030	178128859	4	1	0.0344786
																											722	MPV17	2	27532359	27545969	4	1	0.0344786
																											723	GTF3C2	2	27548715	27579359	4	1	0.0344786
																											724	EIF2B4	2	27587218	27592919	4	1	0.0344786
																											725	SNX17	2	27593362	27600400	4	1	0.0344786
																											726	ZNF513	2	27600097	27603311	4	1	0.0344786
																											727	PPM1G	2	27604065	27632550	4	1	0.0344786
																											728	KRTCAP3	2	27665232	27667164	4	1	0.0344786
																											729	IFT172	2	27667239	27712678	4	1	0.0344786
																											730	FNDC4	2	27714749	27718126	4	1	0.0344786
																											731	GCKR	2	27719705	27746551	4	1	0.0344786
																											732	C2orf16	2	27799388	27805589	4	1	0.0344786
																											733	ZNF512	2	27805835	27846082	4	1	0.0344786
																											734	CCDC121	2	27848505	27851745	4	1	0.0344786
																											735	GPN1	2	27851514	27873713	4	1	0.0344786
																											736	SUPT7L	2	27873675	27886707	4	1	0.0344786
																											737	SLC4A1AP	2	27886337	27917847	4	1	0.0344786
																											738	HNRNPA3	2	178077421	178088687	4	1	0.0344786
																											739	TTC30B	2	178414879	178417524	4	1	0.0344786
																											740	TTC30A	2	178479025	178483694	4	1	0.0344786
																											741	PLCL2	3	16926451	17132098	4	1	0.0344786
																											742	TBC1D5	3	17198653	17741512	4	1	0.0344786
																											743	LOC339862	3	18004063	18310414	4	1	0.0344786
																											744	SATB1	3	18386879	18485610	4	1	0.0344786
																											745	KIF19	17	72322350	72351959	4	1	0.0344786
																											746	TTYH2	17	72209695	72258159	4	1	0.0344786
																											747	CD300E	17	72606021	72619897	4	1	0.0344786
																											748	SLC9A3R1	17	72744750	72765499	4	1	0.0344786
																											749	FADS6	17	72873430	72889909	4	1	0.0344786
																											750	JPT1	17	73131337	73149388	4	1	0.0344786
																											751	LLGL2	17	73521782	73560804	4	1	0.0344786
																											752	RECQL5	17	73622924	73663269	4	1	0.0344786
																											753	UNK	17	73780919	73821886	4	1	0.0344786
																											754	USP36	17	76791733	76836609	4	1	0.0344786
																											755	BAIAP2	17	79008946	79084312	4	1	0.0344786
																											756	CEP131	17	79163392	79196789	4	1	0.0344786
																											757	TMEM105	17	79285069	79304474	4	1	0.0344786
																											758	ASPSCR1	17	79935421	79975282	4	1	0.0344786
																											759	RPL38	17	72199794	72206019	4	1	0.0344786
																											760	DNAI2	17	72270385	72311023	4	1	0.0344786
																											761	BTBD17	17	72352554	72357958	4	1	0.0344786
																											762	GPR142	17	72363644	72368739	4	1	0.0344786
																											763	GPRC5C	17	72427666	72443568	4	1	0.0344786
																											764	CD300A	17	72462511	72480937	4	1	0.0344786
																											765	CD300LB	17	72517312	72527613	4	1	0.0344786
																											766	CD300C	17	72537203	72542310	4	1	0.0344786
																											767	CD300H	17	72556839	72563482	4	1	0.0344786
																											768	CD300LD	17	72576110	72588370	4	1	0.0344786
																											769	C17orf77	17	72580817	72590348	4	1	0.0344786
																											770	RAB37	17	72667255	72743474	4	1	0.0344786
																											771	CD300LF	17	72690446	72709139	4	1	0.0344786
																											772	NAT9	17	72766667	72772564	4	1	0.0344786
																											773	TMEM104	17	72772621	72835922	4	1	0.0344786
																											774	GRIN2C	17	72838161	72856007	4	1	0.0344786
																											775	FDXR	17	72858618	72864876	4	1	0.0344786
																											776	USH1G	17	72912175	72919358	4	1	0.0344786
																											777	OTOP2	17	72920369	72930006	4	1	0.0344786
																											778	OTOP3	17	72931896	72946087	4	1	0.0344786
																											779	HID1	17	72946838	72968900	4	1	0.0344786
																											780	CDR2L	17	72983726	73001895	4	1	0.0344786
																											781	MRPL58	17	73008758	73017356	4	1	0.0344786
																											782	ATP5PD	17	73034954	73043074	4	1	0.0344786
																											783	KCTD2	17	73043278	73061984	4	1	0.0344786
																											784	SLC16A5	17	73083821	73102257	4	1	0.0344786
																											785	ARMC7	17	73106046	73110925	4	1	0.0344786
																											786	NT5C	17	73126319	73127890	4	1	0.0344786
																											787	TMEM94	17	73452544	73496533	4	1	0.0344786
																											788	CASKIN2	17	73496340	73505969	4	1	0.0344786
																											789	TSEN54	17	73512608	73520820	4	1	0.0344786
																											790	MYO15B	17	73584138	73622929	4	1	0.0344786
																											791	SMIM5	17	73629513	73637486	4	1	0.0344786
																											792	SMIM6	17	73642645	73644057	4	1	0.0344786
																											793	SAP30BP	17	73663195	73704142	4	1	0.0344786
																											794	ITGB4	17	73717407	73753899	4	1	0.0344786
																											795	GALK1	17	73754017	73761280	4	1	0.0344786
																											796	H3F3B	17	73772514	73776016	4	1	0.0344786
																											797	ST6GALNAC1	17	74620837	74639920	4	1	0.0344786
																											798	TIMP2	17	76849058	76921472	4	1	0.0344786
																											799	CEP295NL	17	76886661	76899299	4	1	0.0344786
																											800	LGALS3BP	17	76967334	76976061	4	1	0.0344786
																											801	CANT1	17	76987797	77005899	4	1	0.0344786
																											802	C1QTNF1	17	77019015	77045870	4	1	0.0344786
																											803	CHMP6	17	78965640	78973933	4	1	0.0344786
																											804	AATK	17	79091094	79105748	4	1	0.0344786
																											805	TEPSIN	17	79202076	79212891	4	1	0.0344786
																											806	NDUFAF8	17	79213110	79215098	4	1	0.0344786
																											807	SLC38A10	17	79218610	79269139	4	1	0.0344786
																											808	LOC100130370	17	79349231	79358925	4	1	0.0344786
																											809	NOTUM	17	79910382	79919057	4	1	0.0344786
																											810	CENPX	17	79976578	79980785	4	1	0.0344786
																											811	LRRC45	17	79981177	79989027	4	1	0.0344786
																											812	RAC3	17	79989531	79992080	4	1	0.0344786
																											813	DCXR	17	79993756	79995573	4	1	0.0344786
																											814	RFNG	17	80005777	80009650	4	1	0.0344786
																											815	GPS1	17	80009740	80015346	4	1	0.0344786
																											816	DUS1L	17	80015747	80023697	4	1	0.0344786
																											817	FASN	17	80036213	80056106	4	1	0.0344786
																											818	SPTBN4	19	40973125	41082365	4	1	0.0344786
																											819	RAB4B	19	41284123	41302849	4	1	0.0344786
																											820	PPP1R37	19	45596430	45650543	4	1	0.0344786
																											821	SERTAD1	19	40928407	40931932	4	1	0.0344786
																											822	SERTAD3	19	40946747	40948505	4	1	0.0344786
																											823	BLVRB	19	40953690	40971725	4	1	0.0344786
																											824	SHKBP1	19	41082756	41097305	4	1	0.0344786
																											825	LTBP4	19	41099071	41135725	4	1	0.0344786
																											826	NUMBL	19	41171809	41196069	4	1	0.0344786
																											827	COQ8B	19	41197433	41221011	4	1	0.0344786
																											828	ITPKC	19	41223007	41246765	4	1	0.0344786
																											829	C19orf54	19	41246760	41255828	4	1	0.0344786
																											830	SNRPA	19	41256758	41271297	4	1	0.0344786
																											831	MIA	19	41281081	41283398	4	1	0.0344786
																											832	EGLN2	19	41305047	41314346	4	1	0.0344786
																											833	CYP2A6	19	41349442	41356352	4	1	0.0344786
																											834	CYP2A7	19	41381343	41388657	4	1	0.0344786
																											835	CYP2B6	19	41497203	41524301	4	1	0.0344786
																											836	RELB	19	45504706	45541456	4	1	0.0344786
																											837	CLASRP	19	45542297	45574214	4	1	0.0344786
																											838	ZNF296	19	45574757	45579846	4	1	0.0344786
																											839	GEMIN7	19	45579071	45594176	4	1	0.0344786
																											840	NKPD1	19	45653007	45663408	4	1	0.0344786
																											841	TRAPPC6A	19	45666185	45681501	4	1	0.0344786
																											842	BLOC1S3	19	45682002	45685059	4	1	0.0344786
																											843	EXOC3L2	19	45715878	45737469	4	1	0.0344786
																											844	MARK4	19	45754515	45808541	4	1	0.0344786
																											845	CKM	19	45809670	45826235	4	1	0.0344786
																											846	KLC3	19	45843997	45854778	4	1	0.0344786
																											847	ERCC2	19	45854648	45873845	4	1	0.0344786
																											848	PPP1R13L	19	45882891	45908312	4	1	0.0344786
																											849	BTBD3	20	11871370	11907243	4	1	0.0344786
																											850	IL7	8	79645006	79717758	8	7	0.0361556
																											851	MRPS28	8	80831094	80942506	8	7	0.0361556
																											852	TPD52	8	80947102	81083894	8	7	0.0361556
																											853	ZNF704	8	81540685	81787016	8	7	0.0361556
																											854	ZFPM2	8	106331146	106816767	8	7	0.0361556
																											855	OXR1	8	107282405	107764922	8	7	0.0361556
																											856	TRPS1	8	116420723	116680239	8	7	0.0361556
																											857	ZC2HC1A	8	79578281	79632000	8	7	0.0361556
																											858	HEY1	8	80676244	80678710	8	7	0.0361556
																											859	ZBTB10	8	81397853	81438500	8	7	0.0361556
																											860	ZNF572	8	125985538	125991631	8	7	0.0361556
																											861	GOLIM4	3	167726459	167813713	7	5	0.0375286
																											862	ARL6	3	97483364	97520086	6	4	0.046141
																											863	DCBLD2	3	98514813	98620533	6	4	0.046141
																											864	FNDC3B	3	171757417	172118493	6	4	0.046141
																											865	EPHA6	3	96533424	97467786	6	4	0.046141
																											866	CRYBG3	3	97540883	97663830	6	4	0.046141
																											867	CPOX	3	98298289	98312455	6	4	0.046141
																											868	PLD1	3	171318194	171528284	6	4	0.046141
																											869	TMEM212	3	171561138	171577108	6	4	0.046141
																											870	TNFSF10	3	172223297	172241297	6	4	0.046141
																											871	NCEH1	3	172348434	172429008	6	4	0.046141
																											872	ECT2	3	172468474	172539264	6	4	0.046141
																											873	SPATA16	3	172607146	172859058	6	4	0.046141
																											874	LPP	3	187871660	188608460	6	4	0.046141
																											875	HES1	3	193853930	193856401	6	4	0.046141
																											876	GP5	3	194115549	194119995	6	4	0.046141
																											877	RIOX2	3	97660660	97691295	6	4	0.046141
																											878	GABRR3	3	97705526	97754148	6	4	0.046141
																											879	OR5AC2	3	97806016	97806946	6	4	0.046141
																											880	OR5H1	3	97851541	97852483	6	4	0.046141
																											881	OR5H14	3	97868229	97869162	6	4	0.046141
																											882	OR5H15	3	97887543	97888485	6	4	0.046141
																											883	OR5H6	3	97983128	97984106	6	4	0.046141
																											884	OR5H2	3	98001731	98002676	6	4	0.046141
																											885	OR5K4	3	98072697	98073663	6	4	0.046141
																											886	OR5K3	3	98109509	98110475	6	4	0.046141
																											887	OR5K1	3	98188323	98189420	6	4	0.046141
																											888	OR5K2	3	98216524	98217475	6	4	0.046141
																											889	CLDND1	3	98234316	98241910	6	4	0.046141
																											890	GPR15	3	98250742	98253523	6	4	0.046141
																											891	ST3GAL6	3	98451079	98514689	6	4	0.046141
																											892	GHSR	3	172161080	172166246	6	4	0.046141
																											893	CPN2	3	194060493	194072057	6	4	0.046141
																											894	LRRC15	3	194075975	194090472	6	4	0.046141
																											895	ATP13A3	3	194123402	194188968	6	4	0.046141
																											896	TADA2A	17	35766976	35825757	6	4	0.046141
																											897	SYNRG	17	35874899	35969486	6	4	0.046141
																											898	DUSP14	17	35849950	35873588	6	4	0.046141
																											899	DDX52	17	35969786	36003493	6	4	0.046141
																											900	HNF1B	17	36046433	36105069	6	4	0.046141
																											901	AHCY	20	32868070	32899608	6	4	0.046141
																											902	ASIP	20	32848170	32857148	6	4	0.046141
[truncated: 3 more columns]

## Sheet: genes OS groups loss
Order	Gene	Chromosome	Start	End	MB (n=9)	PS (n=10)	Pvalue		Order	Gene	Chromosome	Start	End	MB (n=9)	FC (n=7)	Pvalue		Order	Gene	Chromosome	Start	End	PS (n=10)	FC (n=7)	Pvalue		Order	Gene	Chromosome	Start	End	MB (n=9)	not MB (n=17)	Pvalue		Order	Gene	Chromosome	Start	End	PS (n=10)	not PS (n=16)	Pvalue		Order	Gene	Chromosome	Start	End
1	TPTE2	13	19997016	20110903	9	3	0.00309598		1	ZDHHC20	13	21946709	22033508	9	0	8.74126e-05		1	NCOR1	17	15933407	16097953	7	0	0.00982106		1	TPTE2	13	19997016	20110903	9	3	7.04101e-05		1	RRP1	21	45209417	45223983	5	0	0.00383095		1	SMAD9	13	37418967	37494409
2	PSPC1	13	20277006	20357159	9	3	0.00309598		2	ATP8A2	13	25946148	26599989	9	0	8.74126e-05		2	PIGL	17	16120508	16229573	7	0	0.00982106		2	PSPC1	13	20277006	20357159	9	3	7.04101e-05		2	AGPAT3	21	45285115	45407475	5	0	0.00383095		2	SUPT20H	13	37583448	37633624
3	IFT88	13	21140954	21265576	9	3	0.00309598		3	WASF3	13	27131839	27263082	9	0	8.74126e-05		3	CENPV	17	16245847	16256812	7	0	0.00982106		3	IFT88	13	21140954	21265576	9	3	7.04101e-05		3	TRAPPC10	21	45432205	45526433	5	0	0.00383095		3	POSTN	13	38136718	38172981
4	XPO4	13	21351467	21476913	9	3	0.00309598		4	UBL3	13	30338544	30424820	9	0	8.74126e-05		4	LRRC75A	17	16345318	16395505	7	0	0.00982106		4	XPO4	13	21351467	21476913	9	3	7.04101e-05		4	PDXK	21	45138977	45182188	5	0	0.00383095		4	TRPC4	13	38210772	38443939
5	SGCG	13	23755059	23899304	9	3	0.00309598		5	NBEA	13	35516423	36246873	9	0	8.74126e-05		5	CCDC144A	17	16593638	16678313	7	0	0.00982106		5	SGCG	13	23755059	23899304	9	3	7.04101e-05		5	CSTB	21	45193545	45196256	5	0	0.00383095		5	RFXAP	13	37393338	37403740
6	SACS	13	23902961	24007867	9	3	0.00309598		6	DCLK1	13	36342788	36706157	9	0	8.74126e-05		6	ZSWIM7	17	15879873	15903006	7	0	0.00982106		6	SACS	13	23902961	24007867	9	3	7.04101e-05		6	POFUT2	21	46683842	46707811	5	0	0.00383095		6	ALG5	13	37523906	37573504
7	TUBA3C	13	19747909	19755992	9	3	0.00309598		7	TPTE2	13	19997016	20110903	9	0	8.74126e-05		7	TTC19	17	15902693	15932723	7	0	0.00982106		7	TUBA3C	13	19747909	19755992	9	3	7.04101e-05		7	EVPLL	17	18281078	18292961	6	1	0.00529036		7	EXOSC8	13	37574677	37583751
8	MPHOSPH8	13	20207787	20247599	9	3	0.00309598		8	PSPC1	13	20277006	20357159	9	0	8.74126e-05		8	UBB	17	16284106	16286059	7	0	0.00982106		8	MPHOSPH8	13	20207787	20247599	9	3	7.04101e-05		8	LGALS9C	17	18380098	18398259	6	1	0.00529036		8	CSNK1A1L	13	37677396	37679801
9	ZMYM5	13	20397623	20437776	9	3	0.00309598		9	ZMYM2	13	20532809	20665984	9	0	8.74126e-05		9	TRPV2	17	16318855	16340317	7	0	0.00982106		9	ZMYM5	13	20397623	20437776	9	3	7.04101e-05		9	FAM106A	17	18427879	18430160	6	1	0.00529036		9	ZDHHC20	13	21946709	22033508
10	GJB2	13	20761601	20767114	9	3	0.00309598		10	IFT88	13	21140954	21265576	9	0	8.74126e-05		10	ZNF287	17	16450276	16472526	7	0	0.00982106		10	GJB2	13	20761601	20767114	9	3	7.04101e-05		10	TBC1D28	17	18538841	18547740	6	1	0.00529036		10	ATP8A2	13	25946148	26599989
11	GJB6	13	20796100	20805372	9	3	0.00309598		11	XPO4	13	21351467	21476913	9	0	8.74126e-05		11	ZNF624	17	16524047	16557167	7	0	0.00982106		11	GJB6	13	20796100	20805372	9	3	7.04101e-05		11	ZNF286B	17	18561741	18585572	6	1	0.00529036		11	WASF3	13	27131839	27263082
12	CRYL1	13	20977805	21100012	9	3	0.00309598		12	LATS2	13	21547174	21635722	9	0	8.74126e-05		12	FAM106CP	17	16692056	16693815	7	0	0.00982106		12	CRYL1	13	20977805	21100012	9	3	7.04101e-05		12	TRIM16L	17	18625401	18639431	6	1	0.00529036		12	UBL3	13	30338544	30424820
13	IL17D	13	21277481	21297237	9	3	0.00309598		13	MICU2	13	22066827	22178355	9	0	8.74126e-05		13	RNF126	19	647525	663233	7	0	0.00982106		13	IL17D	13	21277481	21297237	9	3	7.04101e-05		13	FBXW10	17	18647325	18682662	6	1	0.00529036		13	NBEA	13	35516423	36246873
14	EEF1AKMT1	13	21303069	21348097	9	3	0.00309598		14	SGCG	13	23755059	23899304	9	0	8.74126e-05		14	PLPP2	19	281039	291169	7	0	0.00982106		14	EEF1AKMT1	13	21303069	21348097	9	3	7.04101e-05		14	TVP23B	17	18684307	18704742	6	1	0.00529036		14	DCLK1	13	36342788	36706157
15	ZDHHC20	13	21946709	22033508	9	4	0.0108359		15	SACS	13	23902961	24007867	9	0	8.74126e-05		15	MIER2	19	305574	344841	7	0	0.00982106		15	ZDHHC20	13	21946709	22033508	9	4	0.000457666		15	PRPSAP2	17	18759611	18834600	6	1	0.00529036		15	ZMYM2	13	20532809	20665984
16	ATP8A2	13	25946148	26599989	9	4	0.0108359		16	TNFRSF19	13	24144508	24250244	9	0	8.74126e-05		16	THEG	19	362056	376013	7	0	0.00982106		16	ATP8A2	13	25946148	26599989	9	4	0.000457666		16	CBLN1	16	49311827	49315742	4	0	0.0140468		16	LATS2	13	21547174	21635722
17	WASF3	13	27131839	27263082	9	4	0.0108359		17	MIPEP	13	24304327	24463587	9	0	8.74126e-05		17	C2CD4C	19	405442	409170	7	0	0.00982106		17	WASF3	13	27131839	27263082	9	4	0.000457666		17	EIF1	17	39845126	39847898	4	0	0.0140468		17	MICU2	13	22066827	22178355
18	UBL3	13	30338544	30424820	9	4	0.0108359		18	SPATA13	13	24553764	24881212	9	0	8.74126e-05		18	SHC2	19	416582	460996	7	0	0.00982106		18	UBL3	13	30338544	30424820	9	4	0.000457666		18	EZH1	17	40852292	40897114	4	0	0.0140468		18	TNFRSF19	13	24144508	24250244
19	NBEA	13	35516423	36246873	9	4	0.0108359		19	PARP4	13	24995068	25086948	9	0	8.74126e-05		19	ODF3L2	19	463345	474983	7	0	0.00982106		19	NBEA	13	35516423	36246873	9	4	0.000457666		19	FKBP10	17	39968961	39979469	4	0	0.0140468		19	MIPEP	13	24304327	24463587
20	DCLK1	13	36342788	36706157	9	4	0.0108359		20	RNF17	13	25338300	25454059	9	0	8.74126e-05		20	MADCAM1	19	496489	505343	7	0	0.00982106		20	DCLK1	13	36342788	36706157	9	4	0.000457666		20	TTC25	17	40086875	40117669	4	0	0.0140468		20	SPATA13	13	24553764	24881212
21	ZMYM2	13	20532809	20665984	9	4	0.0108359		21	MTMR6	13	25820338	25861704	9	0	8.74126e-05		21	TPGS1	19	507496	519654	7	0	0.00982106		21	ZMYM2	13	20532809	20665984	9	4	0.000457666		21	STAT5B	17	40351194	40428424	4	0	0.0140468		21	PARP4	13	24995068	25086948
22	LATS2	13	21547174	21635722	9	4	0.0108359		22	RNF6	13	26706252	26796508	9	0	8.74126e-05		22	CDC34	19	531732	542087	7	0	0.00982106		22	LATS2	13	21547174	21635722	9	4	0.000457666		22	STAT3	17	40465342	40540405	4	0	0.0140468		22	RNF17	13	25338300	25454059
23	MICU2	13	22066827	22178355	9	4	0.0108359		23	CDK8	13	26828240	26979375	9	0	8.74126e-05		23	GZMM	19	544033	549920	7	0	0.00982106		23	MICU2	13	22066827	22178355	9	4	0.000457666		23	ATP6V0A1	17	40610861	40674597	4	0	0.0140468		23	MTMR6	13	25820338	25861704
24	TNFRSF19	13	24144508	24250244	9	4	0.0108359		24	USP12	13	27640286	27746033	9	0	8.74126e-05		24	BSG	19	571276	583493	7	0	0.00982106		24	TNFRSF19	13	24144508	24250244	9	4	0.000457666		24	TUBG1	17	40761357	40767256	4	0	0.0140468		24	RNF6	13	26706252	26796508
25	MIPEP	13	24304327	24463587	9	4	0.0108359		25	LNX2	13	28120049	28194720	9	0	8.74126e-05		25	HCN2	19	589892	617159	7	0	0.00982106		25	MIPEP	13	24304327	24463587	9	4	0.000457666		25	KRT19	17	39679868	39684641	4	0	0.0140468		25	CDK8	13	26828240	26979375
26	SPATA13	13	24553764	24881212	9	4	0.0108359		26	PAN3	13	28712642	28869475	9	0	8.74126e-05		26	POLRMT	19	617222	633568	7	0	0.00982106		26	SPATA13	13	24553764	24881212	9	4	0.000457666		26	KRT9	17	39722092	39728310	4	0	0.0140468		26	USP12	13	27640286	27746033
27	PARP4	13	24995068	25086948	9	4	0.0108359		27	MTUS2	13	29598747	30080084	9	0	8.74126e-05		27	FGF22	19	639894	643703	7	0	0.00982106		27	PARP4	13	24995068	25086948	9	4	0.000457666		27	KRT14	17	39738530	39743147	4	0	0.0140468		27	LNX2	13	28120049	28194720
28	RNF17	13	25338300	25454059	9	4	0.0108359		28	SLC7A1	13	30083550	30169825	9	0	8.74126e-05		28	FSTL3	19	676388	683392	7	0	0.00982106		28	RNF17	13	25338300	25454059	9	4	0.000457666		28	KRT16	17	39766029	39769079	4	0	0.0140468		28	PAN3	13	28712642	28869475
29	MTMR6	13	25820338	25861704	9	4	0.0108359		29	KATNAL1	13	30776766	30881191	9	0	8.74126e-05		29	PRSS57	19	685520	695461	7	0	0.00982106		29	MTMR6	13	25820338	25861704	9	4	0.000457666		29	KRT17	17	39775691	39780882	4	0	0.0140468		29	MTUS2	13	29598747	30080084
30	RNF6	13	26706252	26796508	9	4	0.0108359		30	HMGB1	13	31032052	31191734	9	0	8.74126e-05		30	IPPK	9	95375465	95432547	6	0	0.0345023		30	RNF6	13	26706252	26796508	9	4	0.000457666		30	GAST	17	39868577	39872221	4	0	0.0140468		30	SLC7A1	13	30083550	30169825
31	CDK8	13	26828240	26979375	9	4	0.0108359		31	USPL1	13	31191815	31234907	9	0	8.74126e-05		31	C9orf3	9	97488950	97695955	6	0	0.0345023		31	CDK8	13	26828240	26979375	9	4	0.000457666		31	HAP1	17	39878890	39890898	4	0	0.0140468		31	KATNAL1	13	30776766	30881191
32	USP12	13	27640286	27746033	9	4	0.0108359		32	ALOX5AP	13	31287614	31338565	9	0	8.74126e-05		32	ZNF782	9	99578550	99616770	6	0	0.0345023		32	USP12	13	27640286	27746033	9	4	0.000457666		32	JUP	17	39910858	39942964	4	0	0.0140468		32	HMGB1	13	31032052	31191734
33	LNX2	13	28120049	28194720	9	4	0.0108359		33	HSPH1	13	31709110	31736158	9	0	8.74126e-05		33	PPP6C	9	127908851	127952218	6	0	0.0345023		33	LNX2	13	28120049	28194720	9	4	0.000457666		33	P3H4	17	39958204	39968451	4	0	0.0140468		33	USPL1	13	31191815	31234907
34	PAN3	13	28712642	28869475	9	4	0.0108359		34	B3GLCT	13	31774111	31906413	9	0	8.74126e-05		34	TTF1	9	135250934	135282238	6	0	0.0345023		34	PAN3	13	28712642	28869475	9	4	0.000457666		34	NT5C3B	17	39981333	39992523	4	0	0.0140468		34	ALOX5AP	13	31287614	31338565
35	MTUS2	13	29598747	30080084	9	4	0.0108359		35	RXFP2	13	32313678	32377009	9	0	8.74126e-05		35	CENPP	9	95087749	95377446	6	0	0.0345023		35	MTUS2	13	29598747	30080084	9	4	0.000457666		35	KLHL10	17	39991936	40004620	4	0	0.0140468		35	HSPH1	13	31709110	31736158
36	SLC7A1	13	30083550	30169825	9	4	0.0108359		36	FRY	13	32605436	32870776	9	0	8.74126e-05		36	ECM2	9	95255828	95298374	6	0	0.0345023		36	SLC7A1	13	30083550	30169825	9	4	0.000457666		36	KLHL11	17	40004769	40021684	4	0	0.0140468		36	B3GLCT	13	31774111	31906413
37	KATNAL1	13	30776766	30881191	9	4	0.0108359		37	BRCA2	13	32889616	32973809	9	0	8.74126e-05		37	WNK2	9	95947211	96081655	6	0	0.0345023		37	KATNAL1	13	30776766	30881191	9	4	0.000457666		37	ACLY	17	40023169	40075275	4	0	0.0140468		37	RXFP2	13	32313678	32377009
38	HMGB1	13	31032052	31191734	9	4	0.0108359		38	N4BP2L2	13	33006624	33112932	9	0	8.74126e-05		38	PTPDC1	9	96793075	96872138	6	0	0.0345023		38	HMGB1	13	31032052	31191734	9	4	0.000457666		38	CNP	17	40118758	40129754	4	0	0.0140468		38	FRY	13	32605436	32870776
39	USPL1	13	31191815	31234907	9	4	0.0108359		39	PDS5B	13	33160563	33352158	9	0	8.74126e-05		39	FBP1	9	97365414	97401923	6	0	0.0345023		39	USPL1	13	31191815	31234907	9	4	0.000457666		39	DNAJC7	17	40128438	40169183	4	0	0.0140468		39	BRCA2	13	32889616	32973809
40	ALOX5AP	13	31287614	31338565	9	4	0.0108359		40	STARD13	13	33677271	33760216	9	0	8.74126e-05		40	FANCC	9	97861335	98079536	6	0	0.0345023		40	ALOX5AP	13	31287614	31338565	9	4	0.000457666		40	NKIRAS2	17	40169593	40177659	4	0	0.0140468		40	N4BP2L2	13	33006624	33112932
41	HSPH1	13	31709110	31736158	9	4	0.0108359		41	RFC3	13	34392205	34540695	9	0	8.74126e-05		41	ERCC6L2	9	98637899	98731122	6	0	0.0345023		41	HSPH1	13	31709110	31736158	9	4	0.000457666		41	ZNF385C	17	40177593	40190044	4	0	0.0140468		41	PDS5B	13	33160563	33352158
42	B3GLCT	13	31774111	31906413	9	4	0.0108359		42	CCDC169-SOHLH2	13	36742344	36871992	9	0	8.74126e-05		42	SLC35D2	9	99082987	99145992	6	0	0.0345023		42	B3GLCT	13	31774111	31906413	9	4	0.000457666		42	DHX58	17	40253421	40264751	4	0	0.0140468		42	STARD13	13	33677271	33760216
43	RXFP2	13	32313678	32377009	9	4	0.0108359		43	CCDC169	13	36801178	36871992	9	0	8.74126e-05		43	HABP4	9	99212436	99253618	6	0	0.0345023		43	RXFP2	13	32313678	32377009	9	4	0.000457666		43	KAT2A	17	40265128	40273382	4	0	0.0140468		43	RFC3	13	34392205	34540695
44	FRY	13	32605436	32870776	9	4	0.0108359		44	SMAD9	13	37418967	37494409	9	0	8.74126e-05		44	CDC14B	9	99262394	99382112	6	0	0.0345023		44	FRY	13	32605436	32870776	9	4	0.000457666		44	HSPB9	17	40274755	40275371	4	0	0.0140468		44	CCDC169-SOHLH2	13	36742344	36871992
45	BRCA2	13	32889616	32973809	9	4	0.0108359		45	SUPT20H	13	37583448	37633624	9	0	8.74126e-05		45	CCDC180	9	100069909	100141033	6	0	0.0345023		45	BRCA2	13	32889616	32973809	9	4	0.000457666		45	RAB5C	17	40276993	40307062	4	0	0.0140468		45	CCDC169	13	36801178	36871992
46	N4BP2L2	13	33006624	33112932	9	4	0.0108359		46	POSTN	13	38136718	38172981	9	0	8.74126e-05		46	TMOD1	9	100263461	100364025	6	0	0.0345023		46	N4BP2L2	13	33006624	33112932	9	4	0.000457666		46	KCNH4	17	40308909	40333296	4	0	0.0140468		46	UFM1	13	38923907	38937144
47	PDS5B	13	33160563	33352158	9	4	0.0108359		47	TRPC4	13	38210772	38443939	9	0	8.74126e-05		47	NCBP1	9	100395704	100436030	6	0	0.0345023		47	PDS5B	13	33160563	33352158	9	4	0.000457666		47	HCRT	17	40336077	40337470	4	0	0.0140468		47	FREM2	13	39261172	39461268
48	STARD13	13	33677271	33760216	9	4	0.0108359		48	UFM1	13	38923907	38937144	9	0	8.74126e-05		48	GAPVD1	9	128024072	128127290	6	0	0.0345023		48	STARD13	13	33677271	33760216	9	4	0.000457666		48	GHDC	17	40341104	40346550	4	0	0.0140468		48	GJA3	13	20712393	20735183
49	RFC3	13	34392205	34540695	9	4	0.0108359		49	FREM2	13	39261172	39461268	9	0	8.74126e-05		49	STXBP1	9	130374485	130454995	6	0	0.0345023		49	RFC3	13	34392205	34540695	9	4	0.000457666		49	STAT5A	17	40439564	40463961	4	0	0.0140468		49	SAP18	13	21714652	21723224
50	CCDC169-SOHLH2	13	36742344	36871992	9	4	0.0108359		50	TUBA3C	13	19747909	19755992	9	0	8.74126e-05		50	SPTAN1	9	131314836	131395944	6	0	0.0345023		50	CCDC169-SOHLH2	13	36742344	36871992	9	4	0.000457666		50	CAVIN1	17	40554466	40575338	4	0	0.0140468		50	SKA3	13	21727733	21750741
51	CCDC169	13	36801178	36871992	9	4	0.0108359		51	MPHOSPH8	13	20207787	20247599	9	0	8.74126e-05		51	PKN3	9	131464782	131483199	6	0	0.0345023		51	CCDC169	13	36801178	36871992	9	4	0.000457666		51	NAGLU	17	40687950	40696467	4	0	0.0140468		51	MRPL57	13	21750371	21753223
52	UFM1	13	38923907	38937144	9	4	0.0108359		52	ZMYM5	13	20397623	20437776	9	0	8.74126e-05		52	KYAT1	9	131595220	131644354	6	0	0.0345023		52	UFM1	13	38923907	38937144	9	4	0.000457666		52	HSD17B1	17	40704575	40707232	4	0	0.0140468		52	FGF9	13	22245214	22278640
53	FREM2	13	39261172	39461268	9	4	0.0108359		53	GJA3	13	20712393	20735183	9	0	8.74126e-05		53	NUP188	9	131709971	131769375	6	0	0.0345023		53	FREM2	13	39261172	39461268	9	4	0.000457666		53	COASY	17	40714091	40718299	4	0	0.0140468		53	PCOTH	13	24463025	24466243
54	GJA3	13	20712393	20735183	9	4	0.0108359		54	GJB2	13	20761601	20767114	9	0	8.74126e-05		54	CRAT	9	131857072	131873077	6	0	0.0345023		54	GJA3	13	20712393	20735183	9	4	0.000457666		54	MLX	17	40719077	40725221	4	0	0.0140468		54	C1QTNF9B	13	24465237	24471145
55	SAP18	13	21714652	21723224	9	4	0.0108359		55	GJB6	13	20796100	20805372	9	0	8.74126e-05		55	NTMT1	9	132371162	132398410	6	0	0.0345023		55	SAP18	13	21714652	21723224	9	4	0.000457666		55	PSMC3IP	17	40724327	40729734	4	0	0.0140468		55	C1QTNF9	13	24881303	24896669
56	SKA3	13	21727733	21750741	9	4	0.0108359		56	CRYL1	13	20977805	21100012	9	0	8.74126e-05		56	C9orf50	9	132374503	132383055	6	0	0.0345023		56	SKA3	13	21727733	21750741	9	4	0.000457666		56	RETREG3	17	40731525	40761445	4	0	0.0140468		56	ATP12A	13	25254548	25285923
57	MRPL57	13	21750371	21753223	9	4	0.0108359		57	IL17D	13	21277481	21297237	9	0	8.74126e-05		57	PTGES	9	132500614	132515344	6	0	0.0345023		57	MRPL57	13	21750371	21753223	9	4	0.000457666		57	TUBG2	17	40811265	40819024	4	0	0.0140468		57	CENPJ	13	25456411	25497027
58	FGF9	13	22245214	22278640	9	4	0.0108359		58	EEF1AKMT1	13	21303069	21348097	9	0	8.74126e-05		58	FNBP1	9	132649465	132805473	6	0	0.0345023		58	FGF9	13	22245214	22278640	9	4	0.000457666		58	PLEKHH3	17	40819931	40829048	4	0	0.0140468		58	PABPC3	13	25670275	25672705
59	PCOTH	13	24463025	24466243	9	4	0.0108359		59	SAP18	13	21714652	21723224	9	0	8.74126e-05		59	PRRC2B	9	134305476	134375578	6	0	0.0345023		59	PCOTH	13	24463025	24466243	9	4	0.000457666		59	CCR10	17	40831419	40833845	4	0	0.0140468		59	AMER2	13	25735816	25746305
60	C1QTNF9B	13	24465237	24471145	9	4	0.0108359		60	SKA3	13	21727733	21750741	9	0	8.74126e-05		60	RAPGEF1	9	134452156	134585229	6	0	0.0345023		60	C1QTNF9B	13	24465237	24471145	9	4	0.000457666		60	CNTNAP1	17	40834631	40852011	4	0	0.0140468		60	NUP58	13	25875665	25916561
61	C1QTNF9	13	24881303	24896669	9	4	0.0108359		61	MRPL57	13	21750371	21753223	9	0	8.74126e-05		61	MED27	9	134735496	134955274	6	0	0.0345023		61	C1QTNF9	13	24881303	24896669	9	4	0.000457666		61	RAMP2	17	40913211	40915059	4	0	0.0140468		61	SHISA2	13	26618734	26625198
62	ATP12A	13	25254548	25285923	9	4	0.0108359		62	FGF9	13	22245214	22278640	9	0	8.74126e-05		62	CFAP77	9	135285582	135448706	6	0	0.0345023		62	ATP12A	13	25254548	25285923	9	4	0.000457666		62	VPS25	17	40925453	40931618	4	0	0.0140468		62	GPR12	13	27329336	27334922
63	CENPJ	13	25456411	25497027	9	4	0.0108359		63	PCOTH	13	24463025	24466243	9	0	8.74126e-05		63	DDX31	9	135468383	135538713	6	0	0.0345023		63	CENPJ	13	25456411	25497027	9	4	0.000457666		63	WNK4	17	40932648	40949084	4	0	0.0140468		63	RPL21	13	27825691	27830705
64	PABPC3	13	25670275	25672705	9	4	0.0108359		64	C1QTNF9B	13	24465237	24471145	9	0	8.74126e-05		64	AK8	9	135600964	135754198	6	0	0.0345023		64	PABPC3	13	25670275	25672705	9	4	0.000457666		64	COA3	17	40949635	40950743	4	0	0.0140468		64	RASL11A	13	27844463	27847827
65	AMER2	13	25735816	25746305	9	4	0.0108359		65	C1QTNF9	13	24881303	24896669	9	0	8.74126e-05		65	TSC1	9	135766734	135820020	6	0	0.0345023		65	AMER2	13	25735816	25746305	9	4	0.000457666		65	CNTD1	17	40950853	40963605	4	0	0.0140468		65	GTF3A	13	27998680	28009846
66	NUP58	13	25875665	25916561	9	4	0.0108359		66	ATP12A	13	25254548	25285923	9	0	8.74126e-05		66	BICD2	9	95473644	95527083	6	0	0.0345023		66	NUP58	13	25875665	25916561	9	4	0.000457666		66	BECN1	17	40962149	40975897	4	0	0.0140468		66	MTIF3	13	28009775	28024326
67	SHISA2	13	26618734	26625198	9	4	0.0108359		67	CENPJ	13	25456411	25497027	9	0	8.74126e-05		67	ZNF484	9	95607312	95640320	6	0	0.0345023		67	SHISA2	13	26618734	26625198	9	4	0.000457666		67	PSME3	17	40985158	40995777	4	0	0.0140468		67	POLR1D	13	28194879	28241559
68	GPR12	13	27329336	27334922	9	4	0.0108359		68	PABPC3	13	25670275	25672705	9	0	8.74126e-05		68	FGD3	9	95709600	95798518	6	0	0.0345023		68	GPR12	13	27329336	27334922	9	4	0.000457666		68	AOC2	17	40996599	41002729	4	0	0.0140468		68	GSX1	13	28366779	28368089
69	RPL21	13	27825691	27830705	9	4	0.0108359		69	AMER2	13	25735816	25746305	9	0	8.74126e-05		69	SUSD3	9	95820969	95847420	6	0	0.0345023		69	RPL21	13	27825691	27830705	9	4	0.000457666		69	AOC3	17	41003200	41010147	4	0	0.0140468		69	PDX1	13	28494167	28500451
70	RASL11A	13	27844463	27847827	9	4	0.0108359		70	NUP58	13	25875665	25916561	9	0	8.74126e-05		70	CARD19	9	95858404	95875577	6	0	0.0345023		70	RASL11A	13	27844463	27847827	9	4	0.000457666		70	G6PC	17	41052813	41066450	4	0	0.0140468		70	CDX2	13	28536204	28543505
71	GTF3A	13	27998680	28009846	9	4	0.0108359		71	SHISA2	13	26618734	26625198	9	0	8.74126e-05		71	NINJ1	9	95883770	95896570	6	0	0.0345023		71	GTF3A	13	27998680	28009846	9	4	0.000457666		71	AARSD1	17	41102542	41116515	4	0	0.0140468		71	URAD	13	28552242	28562774
72	MTIF3	13	28009775	28024326	9	4	0.0108359		72	GPR12	13	27329336	27334922	9	0	8.74126e-05		72	C9orf129	9	96080480	96108696	6	0	0.0345023		72	MTIF3	13	28009775	28024326	9	4	0.000457666		72	PTGES3L-AARSD1	17	41102542	41132020	4	0	0.0140468		72	FLT3	13	28577410	28674729
73	POLR1D	13	28194879	28241559	9	4	0.0108359		73	RPL21	13	27825691	27830705	9	0	8.74126e-05		73	FAM120AOS	9	96208781	96213886	6	0	0.0345023		73	POLR1D	13	28194879	28241559	9	4	0.000457666		73	PTGES3L	17	41120104	41132545	4	0	0.0140468		73	POMP	13	29233140	29253094
74	GSX1	13	28366779	28368089	9	4	0.0108359		74	RASL11A	13	27844463	27847827	9	0	8.74126e-05		74	FAM120A	9	96213977	96293688	6	0	0.0345023		74	GSX1	13	28366779	28368089	9	4	0.000457666		74	RUNDC1	17	41132578	41145709	4	0	0.0140468		74	SLC46A3	13	29274216	29293150
75	PDX1	13	28494167	28500451	9	4	0.0108359		75	GTF3A	13	27998680	28009846	9	0	8.74126e-05		75	PHF2	9	96338908	96441869	6	0	0.0345023		75	PDX1	13	28494167	28500451	9	4	0.000457666		75	RPL27	17	41150445	41154976	4	0	0.0140468		75	MEDAG	13	31480311	31499709
76	CDX2	13	28536204	28543505	9	4	0.0108359		76	MTIF3	13	28009775	28024326	9	0	8.74126e-05		76	BARX1	9	96713908	96717608	6	0	0.0345023		76	CDX2	13	28536204	28543505	9	4	0.000457666		76	IFI35	17	41158741	41166476	4	0	0.0140468		76	TEX26	13	31506833	31549153
77	URAD	13	28552242	28562774	9	4	0.0108359		77	POLR1D	13	28194879	28241559	9	0	8.74126e-05		77	ZNF169	9	97021547	97064111	6	0	0.0345023		77	URAD	13	28552242	28562774	9	4	0.000457666		77	VAT1	17	41166621	41174459	4	0	0.0140468		77	ZAR1L	13	32877907	32886091
78	FLT3	13	28577410	28674729	9	4	0.0108359		78	GSX1	13	28366779	28368089	9	0	8.74126e-05		78	NUTM2F	9	97080477	97090926	6	0	0.0345023		78	FLT3	13	28577410	28674729	9	4	0.000457666		78	RND2	17	41177257	41184058	4	0	0.0140468		78	N4BP2L1	13	32974859	33002315
79	POMP	13	29233140	29253094	9	4	0.0108359		79	PDX1	13	28494167	28500451	9	0	8.74126e-05		79	MFSD14B	9	97136832	97223202	6	0	0.0345023		79	POMP	13	29233140	29253094	9	4	0.000457666		79	BRCA1	17	41196311	41276132	4	0	0.0140468		79	KL	13	33590570	33640282
80	SLC46A3	13	29274216	29293150	9	4	0.0108359		80	CDX2	13	28536204	28543505	9	0	8.74126e-05		80	FBP2	9	97320995	97356114	6	0	0.0345023		80	SLC46A3	13	29274216	29293150	9	4	0.000457666		80	RRP1B	21	45079431	45115960	4	0	0.0140468		80	MAB21L1	13	36047925	36050832
81	MEDAG	13	31480311	31499709	9	4	0.0108359		81	URAD	13	28552242	28562774	9	0	8.74126e-05		81	PTCH1	9	98205263	98269481	6	0	0.0345023		81	MEDAG	13	31480311	31499709	9	4	0.000457666		81	BACE2	21	42539727	42654461	4	0	0.0140468		81	SOHLH2	13	36742344	36788752
82	TEX26	13	31506833	31549153	9	4	0.0108359		82	FLT3	13	28577410	28674729	9	0	8.74126e-05		82	HSD17B3	9	98997588	99064434	6	0	0.0345023		82	TEX26	13	31506833	31549153	9	4	0.000457666		82	FAM3B	21	42688660	42729654	4	0	0.0140468		82	SPART	13	36875774	36920646
83	ZAR1L	13	32877907	32886091	9	4	0.0108359		83	POMP	13	29233140	29253094	9	0	8.74126e-05		83	ZNF367	9	99148222	99180669	6	0	0.0345023		83	ZAR1L	13	32877907	32886091	9	4	0.000457666		83	TMPRSS2	21	42836477	42879992	4	0	0.0140468		83	CCNA1	13	37005966	37017019
84	N4BP2L1	13	32974859	33002315	9	4	0.0108359		84	SLC46A3	13	29274216	29293150	9	0	8.74126e-05		84	AAED1	9	99403532	99417599	6	0	0.0345023		84	N4BP2L1	13	32974859	33002315	9	4	0.000457666		84	PRDM15	21	43218384	43299591	4	0	0.0140468		84	SERTM1	13	37248048	37271976
85	KL	13	33590570	33640282	9	4	0.0108359		85	MEDAG	13	31480311	31499709	9	0	8.74126e-05		85	ZNF510	9	99516830	99540348	6	0	0.0345023		85	KL	13	33590570	33640282	9	4	0.000457666		85	UMODL1	21	43483067	43563105	4	0	0.0140468		85	STOML3	13	39540061	39564996
86	MAB21L1	13	36047925	36050832	9	4	0.0108359		86	TEX26	13	31506833	31549153	9	0	8.74126e-05		86	NUTM2G	9	99691285	99701700	6	0	0.0345023		86	MAB21L1	13	36047925	36050832	9	4	0.000457666		86	ABCG1	21	43619798	43717354	4	0	0.0140468		86	PROSER1	13	39584001	39612213
87	SOHLH2	13	36742344	36788752	9	4	0.0108359		87	ZAR1L	13	32877907	32886091	9	0	8.74126e-05		87	CTSV	9	99791958	99801592	6	0	0.0345023		87	SOHLH2	13	36742344	36788752	9	4	0.000457666		87	RSPH1	21	43892595	43916464	4	0	0.0140468		87	NHLRC3	13	39612447	39624246
88	SPART	13	36875774	36920646	9	4	0.0108359		88	N4BP2L1	13	32974859	33002315	9	0	8.74126e-05		88	TDRD7	9	100174301	100258407	6	0	0.0345023		88	SPART	13	36875774	36920646	9	4	0.000457666		88	PDE9A	21	44073861	44195619	4	0	0.0140468		88	GNA15	19	3136029	3163767
89	CCNA1	13	37005966	37017019	9	4	0.0108359		89	KL	13	33590570	33640282	9	0	8.74126e-05		89	TSTD2	9	100362361	100395962	6	0	0.0345023		89	CCNA1	13	37005966	37017019	9	4	0.000457666		89	PKNOX1	21	44394619	44453692	4	0	0.0140468		89	TLE2	19	2997635	3029165
90	SERTM1	13	37248048	37271976	9	4	0.0108359		90	MAB21L1	13	36047925	36050832	9	0	8.74126e-05		90	XPA	9	100437190	100459691	6	0	0.0345023		90	SERTM1	13	37248048	37271976	9	4	0.000457666		90	HSF2BP	21	44949071	45079374	4	0	0.0140468		90	CELF5	19	3224700	3297074
91	STOML3	13	39540061	39564996	9	4	0.0108359		91	SOHLH2	13	36742344	36788752	9	0	8.74126e-05		91	RABEPK	9	127962820	127996438	6	0	0.0345023		91	STOML3	13	39540061	39564996	9	4	0.000457666		91	PFKL	21	45719916	45747264	4	0	0.0140468		91	NFIC	19	3359560	3469215
92	PROSER1	13	39584001	39612213	9	4	0.0108359		92	SPART	13	36875774	36920646	9	0	8.74126e-05		92	HSPA5	9	127997126	128003666	6	0	0.0345023		92	PROSER1	13	39584001	39612213	9	4	0.000457666		92	TSPEAR	21	45917774	46131495	4	0	0.0140468		92	PIP5K1C	19	3630178	3700477
93	NHLRC3	13	39612447	39624246	9	4	0.0108359		93	CCNA1	13	37005966	37017019	9	0	8.74126e-05		93	ODF2	9	131217433	131257119	6	0	0.0345023		93	NHLRC3	13	39612447	39624246	9	4	0.000457666		93	ADARB1	21	46494492	46646478	4	0	0.0140468		93	MATK	19	3777966	3801810
94	IQCA1	2	237232789	237412340	4	0	0.0325077		94	SERTM1	13	37248048	37271976	9	0	8.74126e-05		94	GLE1	9	131266970	131302156	6	0	0.0345023		94	SMAD9	13	37418967	37494409	9	5	0.000711142		94	COL18A1	21	46825051	46933634	4	0	0.0140468		94	ZBTB7A	19	4043301	4065527
95	ACKR3	2	237478379	237490997	4	0	0.0325077		95	RFXAP	13	37393338	37403740	9	0	8.74126e-05		95	WDR34	9	131395939	131419129	6	0	0.0345023		95	SUPT20H	13	37583448	37633624	9	5	0.000711142		95	MX2	21	42733949	42780869	4	0	0.0140468		95	DIRAS1	19	2714564	2721390
96	SMAD9	13	37418967	37494409	9	5	0.0325077		96	ALG5	13	37523906	37573504	9	0	8.74126e-05		96	SET	9	131445933	131458675	6	0	0.0345023		96	POSTN	13	38136718	38172981	9	5	0.000711142		96	MX1	21	42792484	42831141	4	0	0.0140468		96	SLC39A3	19	2732521	2740074
97	SUPT20H	13	37583448	37633624	9	5	0.0325077		97	EXOSC8	13	37574677	37583751	9	0	8.74126e-05		97	ZDHHC12	9	131483147	131486408	6	0	0.0345023		97	TRPC4	13	38210772	38443939	9	5	0.000711142		97	RIPK4	21	43159528	43187249	4	0	0.0140468		97	SGTA	19	2754711	2783354
98	POSTN	13	38136718	38172981	9	5	0.0325077		98	CSNK1A1L	13	37677396	37679801	9	0	8.74126e-05		98	ZER1	9	131492064	131534213	6	0	0.0345023		98	RFXAP	13	37393338	37403740	9	5	0.000711142		98	C2CD2	21	43305218	43346799	4	0	0.0140468		98	THOP1	19	2785457	2813602
99	TRPC4	13	38210772	38443939	9	5	0.0325077		99	STOML3	13	39540061	39564996	9	0	8.74126e-05		99	TBC1D13	9	131549485	131572711	6	0	0.0345023		99	ALG5	13	37523906	37573504	9	5	0.000711142		99	ZBTB21	21	43406939	43430496	4	0	0.0140468		99	ZNF554	19	2819871	2836733
100	RFXAP	13	37393338	37403740	9	5	0.0325077		100	PROSER1	13	39584001	39612213	9	0	8.74126e-05		100	ENDOG	9	131580778	131584955	6	0	0.0345023		100	EXOSC8	13	37574677	37583751	9	5	0.000711142		100	TFF3	21	43731776	43735706	4	0	0.0140468		100	ZNF555	19	2841432	2860472
101	ALG5	13	37523906	37573504	9	5	0.0325077		101	NHLRC3	13	39612447	39624246	9	0	8.74126e-05		101	SPOUT1	9	131581929	131592100	6	0	0.0345023		101	CSNK1A1L	13	37677396	37679801	9	5	0.000711142		101	TFF2	21	43766465	43771208	4	0	0.0140468		101	ZNF556	19	2867332	2878515
102	EXOSC8	13	37574677	37583751	9	5	0.0325077		102	PCDH9	13	66876965	67804468	8	0	0.0013986		102	LRRC8A	9	131644390	131680318	6	0	0.0345023		102	PCDH9	13	66876965	67804468	8	4	0.00292906		102	TFF1	21	43782390	43786644	4	0	0.0140468		102	ZNF57	19	2900895	2918474
103	CSNK1A1L	13	37677396	37679801	9	5	0.0325077		103	DACH1	13	72012097	72441330	8	0	0.0013986		103	PHYHD1	9	131683173	131704320	6	0	0.0345023		103	DACH1	13	72012097	72441330	8	4	0.00292906		103	TMPRSS3	21	43791995	43809258	4	0	0.0140468		103	ZNF77	19	2933215	2944969
104	RRP1	21	45209417	45223983	0	5	0.0325077		104	FLT1	13	28874482	29069265	8	0	0.0013986		104	DOLK	9	131707808	131710012	6	0	0.0345023		104	FLT1	13	28874482	29069265	8	4	0.00292906		104	UBASH3A	21	43823970	43867790	4	0	0.0140468		104	TLE6	19	2977535	2995182
105	AGPAT3	21	45285115	45407475	0	5	0.0325077		105	LHFPL6	13	39917028	40177356	8	0	0.0013986		105	SH3GLB2	9	131770070	131790632	6	0	0.0345023		105	LHFPL6	13	39917028	40177356	8	4	0.00292906		105	SLC37A1	21	43919741	44001550	4	0	0.0140468		105	AES	19	3052907	3062371
106	TRAPPC10	21	45432205	45526433	0	5	0.0325077		106	COG6	13	40229763	40326765	8	0	0.0013986		106	MIGA2	9	131798789	131834361	6	0	0.0345023		106	COG6	13	40229763	40326765	8	4	0.00292906		106	WDR4	21	44263189	44299693	4	0	0.0140468		106	GNA11	19	3094407	3124000
107	PDXK	21	45138977	45182188	0	5	0.0325077		107	TDRD3	13	60970590	61148013	8	0	0.0013986		107	DOLPP1	9	131843382	131852717	6	0	0.0345023		107	TDRD3	13	60970590	61148013	8	4	0.00292906		107	NDUFV3	21	44313377	44329773	4	0	0.0140468		107	S1PR4	19	3178735	3180330
108	CSTB	21	45193545	45196256	0	5	0.0325077		108	KLHL1	13	70274724	70682625	8	0	0.0013986		108	PTPA	9	131873227	131911225	6	0	0.0345023		108	KLHL1	13	70274724	70682625	8	4	0.00292906		108	ERVH48-1	21	44337360	44345708	4	0	0.0140468		108	NCLN	19	3185874	3209573
109	POFUT2	21	46683842	46707811	0	5	0.0325077		109	PCDH20	13	61983817	61989655	8	0	0.0013986		109	IER5L	9	131937830	131940540	6	0	0.0345023		109	PCDH20	13	61983817	61989655	8	4	0.00292906		109	CBS	21	44473300	44488514	4	0	0.0140468		109	SMIM24	19	3474404	3480540
									110	NAA16	13	41885340	41951166	7	0	0.00323427		110	ASB6	9	132396882	132404448	6	0	0.0345023		110	ADAMTS17	15	100511642	100882210	6	2	0.00770991		110	U2AF1	21	44513065	44527688	4	0	0.0140468		110	DOHH	19	3490818	3500621
									111	KPNA3	13	50273442	50367057	7	0	0.00323427		111	PRRX2	9	132427919	132484953	6	0	0.0345023		111	ETFA	15	76508627	76603810	6	2	0.00770991		111	CRYAA	21	44589117	44592920	4	0	0.0140468		111	FZR1	19	3506294	3536755
									112	ENOX1	13	43787268	44203613	7	0	0.00323427		112	TOR1B	9	132565421	132573568	6	0	0.0345023		112	TMED3	15	79603403	79706228	6	2	0.00770991		112	SIK1	21	44834394	44847012	4	0	0.0140468		112	C19orf71	19	3539154	3544028
									113	TSC22D1	13	45006278	45150701	7	0	0.00323427		113	TOR1A	9	132575220	132586441	6	0	0.0345023		113	ARNT2	15	80696691	80890278	6	2	0.00770991		113	PWP2	21	45527207	45551063	4	0	0.0140468		113	MFSD12	19	3544196	3557582
									114	ERICH6B	13	46115431	46189874	7	0	0.00323427		114	C9orf78	9	132589563	132597572	6	0	0.0345023		114	AKAP13	15	85923846	86292589	6	2	0.00770991		114	GATD3A	21	45553493	45561299	4	0	0.0140468		114	HMG20B	19	3572942	3579081
									115	LRCH1	13	47127295	47319036	7	0	0.00323427		115	USP20	9	132597695	132644117	6	0	0.0345023		115	AGBL1	15	86623038	87572283	6	2	0.00770991		115	ICOSLG	21	45642873	45660887	4	0	0.0140468		115	GIPC3	19	3585568	3593539
									116	CYSLTR2	13	49227846	49285362	7	0	0.00323427		116	FAM78A	9	134133464	134151906	6	0	0.0345023		116	KIF7	15	90171200	90198682	6	2	0.00770991		116	DNMT3L	21	45666221	45682099	4	0	0.0140468		116	TBXA2R	19	3594503	3606831
									117	DLEU7	13	51285161	51418075	7	0	0.00323427		117	PLPP7	9	134165080	134184649	6	0	0.0345023		117	TMEM266	15	76352298	76497304	6	2	0.00770991		117	AIRE	21	45705720	45718102	4	0	0.0140468		117	CACTIN	19	3610625	3626813
									118	FOXO1	13	41129800	41240734	7	0	0.00323427		118	POMT1	9	134378288	134399193	6	0	0.0345023		118	CHRNA3	15	78885393	78913637	6	2	0.00770991		118	C21orf2	21	45748826	45758221	4	0	0.0140468		118	TJP3	19	3708334	3750811
									119	ELF1	13	41506054	41556418	7	0	0.00323427		119	UCK1	9	134399182	134406662	6	0	0.0345023		119	MORF4L1	15	79165122	79190081	6	2	0.00770991		119	TRPM2	21	45773483	45862964	4	0	0.0140468		119	APBA3	19	3750770	3761673
									120	MTRF1	13	41790515	41837713	7	0	0.00323427		120	NTNG2	9	135037333	135118220	6	0	0.0345023		120	RASGRF1	15	79252288	79383215	6	2	0.00770991		120	LRRC3	21	45875368	45878739	4	0	0.0140468		120	MRPL54	19	3762664	3767563
									121	VWA8	13	42140960	42535221	7	0	0.00323427		121	SETX	9	135136826	135230372	6	0	0.0345023		121	FAH	15	80445232	80478924	6	2	0.00770991		121	KRTAP10-1	21	45959067	45960078	4	0	0.0140468		121	RAX2	19	3769086	3772219
									122	DGKH	13	42614171	42817033	7	0	0.00323427		122	BARHL1	9	135457992	135465640	6	0	0.0345023		122	ABHD17C	15	80987651	81047962	6	2	0.00770991		122	KRTAP10-2	21	45970239	45971388	4	0	0.0140468		122	ZFR2	19	3804021	3869027
									123	AKAP11	13	42846288	42897403	7	0	0.00323427		123	GTF3C4	9	135545421	135570342	6	0	0.0345023		123	CEMIP	15	81071683	81244003	6	2	0.00770991		123	KRTAP10-3	21	45977905	45978643	4	0	0.0140468		123	ATCAY	19	3880617	3928080
									124	EPSTI1	13	43460523	43566448	7	0	0.00323427		124	SPACA9	9	135753706	135765419	6	0	0.0345023		124	IL16	15	81489218	81605104	6	2	0.00770991		124	KRTAP10-4	21	45993605	45995248	4	0	0.0140468		124	NMRK2	19	3933100	3942414
									125	DNAJC15	13	43597361	43683306	7	0	0.00323427		125	GFI1B	9	135820931	135867084	6	0	0.0345023		125	TMC3	15	81624759	81666418	6	2	0.00770991		125	KRTAP10-5	21	45999331	46000481	4	0	0.0140468		125	DAPK3	19	3958450	3971121
									126	CCDC122	13	44410487	44453826	7	0	0.00323427		126	MYH10	17	8377522	8534079	6	0	0.0345023		126	EFL1	15	82422560	82554869	6	2	0.00770991		126	KRTAP10-6	21	46011148	46012386	4	0	0.0140468		126	EEF2	19	3976053	3985461
									127	SERP2	13	44947785	44971850	7	0	0.00323427		127	UBE2G1	17	4172511	4269969	6	0	0.0345023		127	SAXO2	15	82555151	82577268	6	2	0.00770991		127	KRTAP10-7	21	46020496	46022091	4	0	0.0140468		127	PIAS4	19	4007595	4039384
									128	GTF2F2	13	45694630	45858240	7	0	0.00323427		128	RABEP1	17	5185557	5289660	6	0	0.0345023		128	CPEB1	15	83211950	83240573	6	2	0.00770991		128	KRTAP10-8	21	46031995	46032871	4	0	0.0140468		128	MAP2K2	19	4090318	4124126
									129	SIAH3	13	46354404	46425846	7	0	0.00323427		129	TMEM102	17	7338761	7340998	6	0	0.0345023		129	AP3B2	15	83328032	83378660	6	2	0.00770991		129	KRTAP10-9	21	46047039	46048295	4	0	0.0140468		129	PCDH9	13	66876965	67804468
									130	ZC3H13	13	46528599	46626913	7	0	0.00323427		130	STX8	17	9153787	9479275	6	0	0.0345023		130	WHAMM	15	83478379	83503613	6	2	0.00770991		130	KRTAP10-10	21	46057272	46058372	4	0	0.0140468		130	DACH1	13	72012097	72441330
									131	CPB2	13	46627321	46679211	7	0	0.00323427		131	DNAH9	17	11501747	11873065	6	0	0.0345023		131	SH3GL3	15	84115979	84287495	6	2	0.00770991		131	KRTAP10-11	21	46066330	46067567	4	0	0.0140468		131	TPTE2	13	19997016	20110903
									132	LRRC63	13	46786077	46850938	7	0	0.00323427		132	MYOCD	17	12569206	12672266	6	0	0.0345023		132	ADAMTSL3	15	84322837	84708594	6	2	0.00770991		132	KRTAP12-4	21	46074129	46074576	4	0	0.0140468		132	PSPC1	13	20277006	20357159
									133	RUBCNL	13	46916134	46961635	7	0	0.00323427		133	TOM1L2	17	17746821	17875784	6	0	0.0345023		133	WDR73	15	85184725	85197574	6	2	0.00770991		133	KRTAP12-3	21	46077848	46078258	4	0	0.0140468		133	IFT88	13	21140954	21265576
									134	HTR2A	13	47405676	47471211	7	0	0.00323427		134	RAP1GAP2	17	2680214	2941035	6	0	0.0345023		134	ZNF592	15	85291817	85349663	6	2	0.00770991		134	KRTAP12-2	21	46086105	46086844	4	0	0.0140468		134	XPO4	13	21351467	21476913
									135	RB1	13	48877882	49056026	7	0	0.00323427		135	SPATA22	17	3343304	3417146	6	0	0.0345023		135	SLC28A1	15	85427891	85489027	6	2	0.00770991		135	KRTAP12-1	21	46101490	46102078	4	0	0.0140468		135	SGCG	13	23755059	23899304
									136	CAB39L	13	49882785	49975674	7	0	0.00323427		136	SHPK	17	3511555	3539616	6	0	0.0345023		136	PDE8A	15	85523743	85682376	6	2	0.00770991		136	KRTAP10-12	21	46117086	46117959	4	0	0.0140468		136	SACS	13	23902961	24007867
									137	SETDB2-PHF11	13	50018428	50103128	7	0	0.00323427		137	ITGAE	17	3617918	3704537	6	0	0.0345023		137	NTRK3	15	88419987	88799962	6	2	0.00770991		137	UBE2G2	21	46188494	46221751	4	0	0.0140468		137	FLT1	13	28874482	29069265
									138	KCNRG	13	50589389	50595058	7	0	0.00323427		138	P2RX1	17	3799884	3819960	6	0	0.0345023		138	ACAN	15	89346673	89418585	6	2	0.00770991		138	SUMO3	21	46225531	46238044	4	0	0.0140468		138	LHFPL6	13	39917028	40177356
									139	RNASEH2B	13	51483813	51530901	7	0	0.00323427		139	ZZEF1	17	3907738	4046253	6	0	0.0345023		139	ABHD2	15	89631380	89745591	6	2	0.00770991		139	PTTG1IP	21	46269499	46293818	4	0	0.0140468		139	COG6	13	40229763	40326765
									140	WDFY2	13	52158483	52336171	7	0	0.00323427		140	PITPNM3	17	6354582	6459877	6	0	0.0345023		140	C15orf38-AP3S2	15	90373830	90456222	6	2	0.00770991		140	ITGB2	21	46305867	46340877	4	0	0.0140468		140	AKAP11	13	42846288	42897403
									141	ATP7B	13	52506804	52585630	7	0	0.00323427		141	MED31	17	6546632	6554954	6	0	0.0345023		141	ZNF710	15	90544722	90625432	6	2	0.00770991		141	FAM207A	21	46359611	46396904	4	0	0.0140468		141	EPSTI1	13	43460523	43566448
									142	NEK5	13	52638897	52703228	7	0	0.00323427		142	FBXO39	17	6679551	6690965	6	0	0.0345023		142	SV2B	15	91642817	91845795	6	2	0.00770991		142	SLC19A1	21	46934628	46962385	4	0	0.0140468		142	DNAJC15	13	43597361	43683306
									143	THSD1	13	52951301	52980629	7	0	0.00323427		143	SLC16A11	17	6944948	6947242	6	0	0.0345023		143	SLCO3A1	15	92396937	92709137	6	2	0.00770991		143	NCOR1	17	15933407	16097953	7	3	0.0152058		143	OLFM4	13	53602875	53626196
									144	HNRNPA1L2	13	53191604	53217919	7	0	0.00323427		144	ASGR1	17	7076749	7082883	6	0	0.0345023		144	MCTP2	15	94841429	95027181	6	2	0.00770991		144	PIGL	17	16120508	16229573	7	3	0.0152058		144	TDRD3	13	60970590	61148013
									145	OLFM4	13	53602875	53626196	7	0	0.00323427		145	SENP3	17	7465308	7475287	6	0	0.0345023		145	IGF1R	15	99191767	99507759	6	2	0.00770991		145	CENPV	17	16245847	16256812	7	3	0.0152058		145	KLHL1	13	70274724	70682625
									146	DIAPH3	13	60239716	60738119	7	0	0.00323427		146	WRAP53	17	7589388	7606820	6	0	0.0345023		146	TTC23	15	99676527	99789824	6	2	0.00770991		146	LRRC75A	17	16345318	16395505	7	3	0.0152058		146	TUBA3C	13	19747909	19755992
									147	MRPS31	13	41303431	41345347	7	0	0.00323427		147	DNAH2	17	7620671	7737062	6	0	0.0345023		147	LRRC28	15	99791566	99930937	6	2	0.00770991		147	CCDC144A	17	16593638	16678313	7	3	0.0152058		147	MPHOSPH8	13	20207787	20247599
									148	SLC25A15	13	41363546	41386596	7	0	0.00323427		148	NTN1	17	8924858	9147317	6	0	0.0345023		148	MEF2A	15	100106132	100256693	6	2	0.00770991		148	ZSWIM7	17	15879873	15903006	7	3	0.0152058		148	ZMYM5	13	20397623	20437776
									149	WBP4	13	41635392	41658148	7	0	0.00323427		149	USP43	17	9548853	9633004	6	0	0.0345023		149	LYSMD4	15	100267605	100273590	6	2	0.00770991		149	TTC19	17	15902693	15932723	7	3	0.0152058		149	GJB2	13	20761601	20767114
									150	KBTBD6	13	41701708	41706936	7	0	0.00323427		150	GAS7	17	9813925	9862766	6	0	0.0345023		150	CERS3	15	100940599	101084491	6	2	0.00770991		150	UBB	17	16284106	16286059	7	3	0.0152058		150	GJB6	13	20796100	20805372
									151	KBTBD7	13	41765526	41768711	7	0	0.00323427		151	MYH13	17	10204182	10276322	6	0	0.0345023		151	ASB7	15	101142754	101191906	6	2	0.00770991		151	TRPV2	17	16318855	16340317	7	3	0.0152058		151	CRYL1	13	20977805	21100012
									152	RGCC	13	42031541	42045013	7	0	0.00323427		152	MYH4	17	10346606	10372876	6	0	0.0345023		152	ALDH1A3	15	101419896	101456831	6	2	0.00770991		152	ZNF287	17	16450276	16472526	7	3	0.0152058		152	IL17D	13	21277481	21297237
									153	TNFSF11	13	43136871	43182149	7	0	0.00323427		153	TMEM220	17	10616611	10633646	6	0	0.0345023		153	LRRK1	15	101459419	101613095	6	2	0.00770991		153	ZNF624	17	16524047	16557167	7	3	0.0152058		153	EEF1AKMT1	13	21303069	21348097
									154	FAM216B	13	43355685	43365685	7	0	0.00323427		154	SHISA6	17	11144739	11467380	6	0	0.0345023		154	PCSK6	15	101844132	102030187	6	2	0.00770991		154	FAM106CP	17	16692056	16693815	7	3	0.0152058		154	TNFSF11	13	43136871	43182149
									155	LACC1	13	44453419	44468068	7	0	0.00323427		155	MAP2K4	17	11924134	12047148	6	0	0.0345023		155	ISL2	15	76629064	76634816	6	2	0.00770991		155	FOCAD	9	20658307	20995954	5	1	0.0184251		155	FAM216B	13	43355685	43365685
									156	SMIM2	13	44717286	44735393	7	0	0.00323427		156	ARHGAP44	17	12692828	12894961	6	0	0.0345023		156	CHRNA5	15	78857861	78887611	6	2	0.00770991		156	MLLT3	9	20341662	20621986	5	1	0.0184251		156	PCDH20	13	61983817	61989655
									157	NUFIP1	13	45513383	45563613	7	0	0.00323427		157	HS3ST3A1	17	13397348	13505259	6	0	0.0345023		157	CHRNB4	15	78916635	78933587	6	2	0.00770991		157	ZCCHC7	9	37120468	37358146	5	1	0.0184251		157	IZUMO4	19	2096867	2099583
									158	GPALPP1	13	45563664	45602405	7	0	0.00323427		158	COX10	17	13972718	14111996	6	0	0.0345023		158	ADAMTS7	15	79051544	79103805	6	2	0.00770991		158	POLR1E	9	37485931	37503694	5	1	0.0184251		158	ANKRD24	19	4183350	4224811
									159	KCTD4	13	45766987	45775175	7	0	0.00323427		159	TVP23C-CDRT4	17	15339331	15466945	6	0	0.0345023		159	CTSH	15	79214091	79237440	6	2	0.00770991		159	SHB	9	37915894	38069210	5	1	0.0184251		159	RNF126	19	647525	663233
									160	TPT1	13	45907605	45915419	7	0	0.00323427		160	TVP23C	17	15405577	15466945	6	0	0.0345023		160	ANKRD34C	15	79575145	79590581	6	2	0.00770991		160	HACD4	9	21003619	21031458	5	1	0.0184251		160	REXO1	19	1815244	1848452
									161	SLC25A30	13	45967450	45992590	7	0	0.00323427		161	ADORA2B	17	15848230	15879210	6	0	0.0345023		161	KIAA1024	15	79724857	79764642	6	2	0.00770991		161	IFNB1	9	21077103	21077962	5	1	0.0184251		161	CSNK1G2	19	1941160	1981337
									162	COG3	13	46039029	46110833	7	0	0.00323427		162	MPRIP	17	16946073	17095962	6	0	0.0345023		162	MTHFS	15	80135888	80189391	6	2	0.00770991		162	IFNW1	9	21140630	21141900	5	1	0.0184251		162	DOT1L	19	2164147	2232577
									163	SPERT	13	46276438	46288694	7	0	0.00323427		163	COPS3	17	17149937	17184012	6	0	0.0345023		163	ST20-MTHFS	15	80135888	80215448	6	2	0.00770991		163	IFNA21	9	21165635	21166659	5	1	0.0184251		163	GNG7	19	2511217	2702746
									164	LCP1	13	46700057	46756459	7	0	0.00323427		164	PEMT	17	17408876	17480779	6	0	0.0345023		164	ST20	15	80191181	80207598	6	2	0.00770991		164	IFNA4	9	21186616	21187598	5	1	0.0184251		164	STAP2	19	4324039	4338847
									165	ESD	13	47345390	47371367	7	0	0.00323427		165	RAI1	17	17584786	17714767	6	0	0.0345023		165	BCL2A1	15	80253231	80263643	6	2	0.00770991		165	IFNA7	9	21201467	21202204	5	1	0.0184251		165	UBXN6	19	4445002	4457791
									166	ITM2B	13	48807273	48836232	7	0	0.00323427		166	GID4	17	17942610	17971718	6	0	0.0345023		166	ZFAND6	15	80351909	80430735	6	2	0.00770991		166	IFNA10	9	21206179	21207142	5	1	0.0184251		166	PLPP2	19	281039	291169
									167	RCBTB2	13	49063098	49107392	7	0	0.00323427		167	ALKBH5	17	18086866	18113268	6	0	0.0345023		167	MESD	15	81268084	81282219	6	2	0.00770991		167	IFNA16	9	21216371	21217310	5	1	0.0184251		167	MIER2	19	305574	344841
									168	CDADC1	13	49822046	49867622	7	0	0.00323427		168	SMCR8	17	18218593	18231370	6	0	0.0345023		168	TLNRD1	15	81293294	81296345	6	2	0.00770991		168	IFNA17	9	21227241	21228221	5	1	0.0184251		168	THEG	19	362056	376013
									169	SETDB2	13	50018428	50069139	7	0	0.00323427		169	PAFAH1B1	17	2496922	2588909	6	0	0.0345023		169	CFAP161	15	81426643	81441516	6	2	0.00770991		169	IFNA14	9	21239200	21239978	5	1	0.0184251		169	C2CD4C	19	405442	409170
									170	PHF11	13	50069745	50103128	7	0	0.00323427		170	CLUH	17	2592679	2614927	6	0	0.0345023		170	STARD5	15	81605006	81616524	6	2	0.00770991		170	IFNA5	9	21304612	21305312	5	1	0.0184251		170	SHC2	19	416582	460996
									171	RCBTB1	13	50106081	50159719	7	0	0.00323427		171	OR1D5	17	2965962	2966901	6	0	0.0345023		171	MEX3B	15	82334118	82338484	6	2	0.00770991		171	KLHL9	9	21329669	21335431	5	1	0.0184251		171	ODF3L2	19	463345	474983
									172	ARL11	13	50202434	50208008	7	0	0.00323427		172	OR1D2	17	2995351	2996290	6	0	0.0345023		172	GOLGA6L9	15	82722184	82731587	6	2	0.00770991		172	IFNA6	9	21350316	21350886	5	1	0.0184251		172	MADCAM1	19	496489	505343
									173	EBPL	13	50234811	50265623	7	0	0.00323427		173	OR1G1	17	3029903	3030845	6	0	0.0345023		173	RPS17	15	82821157	82824952	6	2	0.00770991		173	IFNA13	9	21367370	21368075	5	1	0.0184251		173	TPGS1	19	507496	519654
									174	SPRYD7	13	50486837	50510637	7	0	0.00323427		174	OR1A2	17	3100810	3101742	6	0	0.0345023		174	GOLGA6L10	15	82929673	82939197	6	2	0.00770991		174	IFNA2	9	21384253	21385396	5	1	0.0184251		174	CDC34	19	531732	542087
									175	TRIM13	13	50571142	50592603	7	0	0.00323427		175	OR1A1	17	3118914	3119844	6	0	0.0345023		175	FSD2	15	83424116	83474822	6	2	0.00770991		175	IFNA8	9	21409145	21410184	5	1	0.0184251		175	GZMM	19	544033	549920
									176	FAM124A	13	51796469	51827750	7	0	0.00323427		176	OR3A2	17	3181183	3182268	6	0	0.0345023		176	HOMER2	15	83517728	83621476	6	2	0.00770991		176	IFNA1	9	21440452	21441315	5	1	0.0184251		176	BSG	19	571276	583493
									177	SERPINE3	13	51915167	51936239	7	0	0.00323427		177	OR3A1	17	3194928	3195876	6	0	0.0345023		177	RAMMET	15	83654954	83659809	6	2	0.00770991		177	IFNE	9	21480837	21482312	5	1	0.0184251		177	HCN2	19	589892	617159
									178	INTS6	13	51935700	52027275	7	0	0.00323427		178	OR1E1	17	3300759	3301704	6	0	0.0345023		178	C15orf40	15	83657714	83680393	6	2	0.00770991		178	MTAP	9	21802634	21865970	5	1	0.0184251		178	POLRMT	19	617222	633568
									179	DHRS12	13	52342128	52378298	7	0	0.00323427		179	OR3A3	17	3323861	3324827	6	0	0.0345023		179	BTBD1	15	83685174	83736106	6	2	0.00770991		179	CDKN2A	9	21967750	21974826	5	1	0.0184251		179	FGF22	19	639894	643703
									180	CCDC70	13	52436083	52440372	7	0	0.00323427		180	OR1E2	17	3336163	3337135	6	0	0.0345023		180	TM6SF1	15	83776237	83806111	6	2	0.00770991		180	GRHPR	9	37422706	37436986	5	1	0.0184251		180	FSTL3	19	676388	683392
									181	ALG11	13	52586522	52603780	7	0	0.00323427		181	ASPA	17	3377403	3402700	6	0	0.0345023		181	HDGFL3	15	83806803	83876770	6	2	0.00770991		181	ZBTB5	9	37438098	37465407	5	1	0.0184251		181	PRSS57	19	685520	695461
									182	UTP14C	13	52598826	52607736	7	0	0.00323427		182	TRPV3	17	3413795	3461289	6	0	0.0345023		182	BNC1	15	83924654	83952209	6	2	0.00770991		182	FBXO10	9	37510888	37576250	5	1	0.0184251		182	CBARP	19	1229946	1237990
									183	NEK3	13	52706778	52733670	7	0	0.00323427		183	TRPV1	17	3468739	3496171	6	0	0.0345023		183	UBE2Q2L	15	84841241	84850985	6	2	0.00770991		183	TOMM5	9	37588409	37592636	5	1	0.0184251		183	ATP5F1D	19	1241748	1244824
									184	VPS36	13	52986736	53024379	7	0	0.00323427		184	CTNS	17	3539761	3566397	6	0	0.0345023		184	GOLGA6L4	15	84904524	84914120	6	2	0.00770991		184	FRMPD1	9	37651051	37746901	5	1	0.0184251		184	MIDN	19	1248551	1259142
									185	CKAP2	13	53029494	53039978	7	0	0.00323427		185	TAX1BP3	17	3566186	3571973	6	0	0.0345023		185	ZSCAN2	15	85144248	85150116	6	2	0.00770991		185	TRMT10B	9	37753799	37778969	5	1	0.0184251		185	CIRBP	19	1269264	1273171
									186	SUGT1	13	53226825	53262489	7	0	0.00323427		186	EMC6	17	3572016	3572963	6	0	0.0345023		186	NMB	15	85198359	85201802	6	2	0.00770991		186	EXOSC3	9	37779710	37785089	5	1	0.0184251		186	C19orf24	19	1275519	1279243
									187	CNMD	13	53277398	53313947	7	0	0.00323427		187	P2RX5	17	3576520	3599698	6	0	0.0345023		187	SEC11A	15	85212767	85259691	6	2	0.00770991		187	DCAF10	9	37800550	37867666	5	1	0.0184251		187	EFNA2	19	1286152	1301430
									188	PCDH8	13	53418108	53422775	7	0	0.00323427		188	HASPIN	17	3627196	3629993	6	0	0.0345023		188	ALPK3	15	85359910	85416713	6	2	0.00770991		188	SLC25A51	9	37887593	37904350	5	1	0.0184251		188	MUM1	19	1354975	1378430
									189	PRR20A	13	57715051	57718073	7	0	0.00323427		189	NCBP3	17	3710041	3749545	6	0	0.0345023		189	GOLGA6L3	15	85783640	85790418	6	2	0.00770991		189	SLC5A10	17	18853988	18924004	5	1	0.0184251		189	NDUFS7	19	1383882	1395588
									190	PRR20B	13	57721621	57724643	7	0	0.00323427		190	CAMKK1	17	3763608	3794037	6	0	0.0345023		190	KLHL25	15	86302556	86338189	6	2	0.00770991		190	SPECC1	17	19912648	20218072	5	1	0.0184251		190	GAMT	19	1397024	1401569
									191	PRR20C	13	57728194	57731216	7	0	0.00323427		191	ATP2A3	17	3827162	3867758	6	0	0.0345023		191	MRPL46	15	89002708	89010633	6	2	0.00770991		191	B9D1	17	19238684	19281506	5	1	0.0184251		191	DAZAP1	19	1407567	1435686
									192	PRR20D	13	57734765	57737787	7	0	0.00323427		192	CYB5D2	17	4046461	4060991	6	0	0.0345023		192	MRPS11	15	89010683	89015851	6	2	0.00770991		192	FAM83G	17	18874380	18908060	5	1	0.0184251		192	RPS15	19	1438362	1440496
									193	PRR20E	13	57741330	57744352	7	0	0.00323427		193	ANKFY1	17	4067111	4167142	6	0	0.0345023		193	DET1	15	89055710	89089606	6	2	0.00770991		193	GRAP	17	18923968	18950365	5	1	0.0184251		193	APC2	19	1450147	1473243
									194	PCDH17	13	58205788	58303065	7	0	0.00323427		194	USP6	17	5019732	5078327	6	0	0.0345023		194	AEN	15	89164526	89175512	6	2	0.00770991		194	GRAPL	17	19030781	19062148	5	1	0.0184251		194	C19orf25	19	1473199	1479228
									195	GNA15	19	3136029	3163767	7	0	0.00323427		195	ZNF594	17	5082830	5095178	6	0	0.0345023		195	ISG20	15	89178867	89199575	6	2	0.00770991		195	LOC79999	17	19057836	19065937	5	1	0.0184251		195	PCSK4	19	1481426	1490449
									196	ANKRD24	19	4183350	4224811	7	0	0.00323427		196	SCIMP	17	5112214	5138155	6	0	0.0345023		196	HAPLN3	15	89420515	89438857	6	2	0.00770991		196	LOC388436	17	19118942	19127043	5	1	0.0184251		196	REEP6	19	1491003	1497924
									197	TLE2	19	2997635	3029165	7	0	0.00323427		197	NUP88	17	5288152	5323059	6	0	0.0345023		197	MFGE8	15	89441913	89455993	6	2	0.00770991		197	EPN2	17	19140689	19240028	5	1	0.0184251		197	ADAMTSL5	19	1505016	1513188
									198	CELF5	19	3224700	3297074	7	0	0.00323427		198	RPAIN	17	5322960	5332985	6	0	0.0345023		198	RLBP1	15	89753097	89764922	6	2	0.00770991		198	MAPK7	17	19281033	19286857	5	1	0.0184251		198	PLK5	19	1524072	1535455
									199	NFIC	19	3359560	3469215	7	0	0.00323427		199	C1QBP	17	5336098	5342471	6	0	0.0345023		199	FANCI	15	89787193	89860362	6	2	0.00770991		199	MFAP4	17	19286754	19290532	5	1	0.0184251		199	MEX3D	19	1554667	1568057
									200	PIP5K1C	19	3630178	3700477	7	0	0.00323427		200	DHX33	17	5344231	5372380	6	0	0.0345023		200	POLG	15	89859535	89878026	6	2	0.00770991		200	RNF112	17	19314490	19320589	5	1	0.0184251		200	MBD3	19	1576669	1592760
									201	MATK	19	3777966	3801810	7	0	0.00323427		201	DERL2	17	5374570	5389550	6	0	0.0345023		201	RHCG	15	90014637	90039814	6	2	0.00770991		201	SLC47A1	17	19437166	19482346	5	1	0.0184251		201	UQCR11	19	1597153	1605483
									202	ZBTB7A	19	4043301	4065527	7	0	0.00323427		202	MIS12	17	5389693	5394131	6	0	0.0345023		202	TICRR	15	90118817	90171254	6	2	0.00770991		202	ALDH3A2	17	19552063	19580904	5	1	0.0184251		202	TCF3	19	1609288	1650286
									203	STAP2	19	4324039	4338847	7	0	0.00323427		203	LOC728392	17	5402746	5404319	6	0	0.0345023		203	PLIN1	15	90207597	90222648	6	2	0.00770991		203	SLC47A2	17	19581627	19620043	5	1	0.0184251		203	ONECUT3	19	1753661	1775444
									204	UBXN6	19	4445002	4457791	7	0	0.00323427		204	NLRP1	17	5404718	5487832	6	0	0.0345023		204	PEX11A	15	90224761	90234015	6	2	0.00770991		204	ALDH3A1	17	19641296	19648772	5	1	0.0184251		204	ATP8B3	19	1782073	1812236
									205	MUC16	19	8959519	9092018	7	0	0.00323427		205	WSCD1	17	5973933	6027747	6	0	0.0345023		205	WDR93	15	90234027	90247709	6	2	0.00770991		205	ULK2	17	19674142	19771239	5	1	0.0184251		205	KLF16	19	1852397	1863564
									206	DIRAS1	19	2714564	2721390	7	0	0.00323427		206	AIPL1	17	6327056	6338452	6	0	0.0345023		206	MESP1	15	90293097	90294540	6	2	0.00770991		206	AKAP10	17	19807614	19881169	5	1	0.0184251		206	ABHD17A	19	1876974	1885518
									207	SLC39A3	19	2732521	2740074	7	0	0.00323427		207	PIMREG	17	6347734	6354385	6	0	0.0345023		207	MESP2	15	90319588	90321985	6	2	0.00770991		207	FAM106B	17	20320332	20321831	5	1	0.0184251		207	ADAT3	19	1905212	1913446
									208	SGTA	19	2754711	2783354	7	0	0.00323427		208	KIAA0753	17	6481644	6544247	6	0	0.0345023		208	ANPEP	15	90328125	90358072	6	2	0.00770991		208	LGALS9B	17	20353175	20370848	5	1	0.0184251		208	SCAMP4	19	1905212	1926016
									209	THOP1	19	2785457	2813602	7	0	0.00323427		209	TXNDC17	17	6544221	6547861	6	0	0.0345023		209	AP3S2	15	90373830	90437617	6	2	0.00770991		209	CDRT15L2	17	20483036	20484224	5	1	0.0184251		209	BTBD2	19	1985446	2015702
									210	ZNF554	19	2819871	2836733	7	0	0.00323427		210	C17orf100	17	6555058	6556617	6	0	0.0345023		210	ARPIN	15	90439763	90455919	6	2	0.00770991		210	CCDC144NL	17	20766707	20799453	5	1	0.0184251		210	MKNK2	19	2037469	2051243
									211	ZNF555	19	2841432	2860472	7	0	0.00323427		211	SLC13A5	17	6588031	6616740	6	0	0.0345023		211	IDH2	15	90627209	90643853	6	2	0.00770991		211	USP22	17	20902905	20946352	5	1	0.0184251		211	MOB3A	19	2071034	2096269
									212	ZNF556	19	2867332	2878515	7	0	0.00323427		212	XAF1	17	6659155	6678966	6	0	0.0345023		212	VPS33B	15	91541645	91565851	6	2	0.00770991		212	GJD3	17	38516903	38520945	5	1	0.0184251		212	AP3D1	19	2100986	2151556
									213	ZNF57	19	2900895	2918474	7	0	0.00323427		213	TEKT1	17	6703299	6735060	6	0	0.0345023		213	NR2F2	15	96869156	96883492	6	2	0.00770991		213	MYH10	17	8377522	8534079	6	3	0.046141		213	PLEKHJ1	19	2229950	2236352
									214	ZNF77	19	2933215	2944969	7	0	0.00323427		214	ALOX12	17	6899383	6914055	6	0	0.0345023		214	SPATA8	15	97326636	97328845	6	2	0.00770991		214	UBE2G1	17	4172511	4269969	6	3	0.046141		214	SF3A2	19	2236815	2248678
									215	TLE6	19	2977535	2995182	7	0	0.00323427		215	RNASEK	17	6915735	6917852	6	0	0.0345023		215	ARRDC4	15	98503932	98517068	6	2	0.00770991		215	RABEP1	17	5185557	5289660	6	3	0.046141		215	AMH	19	2249277	2252072
									216	AES	19	3052907	3062371	7	0	0.00323427		216	C17orf49	17	6918055	6920843	6	0	0.0345023		216	FAM169B	15	98980390	99057611	6	2	0.00770991		216	TMEM102	17	7338761	7340998	6	3	0.046141		216	JSRP1	19	2252249	2256422
									217	GNA11	19	3094407	3124000	7	0	0.00323427		217	BCL6B	17	6926368	6932961	6	0	0.0345023		217	PGPEP1L	15	99511458	99548885	6	2	0.00770991		217	STX8	17	9153787	9479275	6	3	0.046141		217	OAZ1	19	2269484	2273487
									218	S1PR4	19	3178735	3180330	7	0	0.00323427		218	SLC16A13	17	6939393	6943440	6	0	0.0345023		218	SYNM	15	99645285	99675800	6	2	0.00770991		218	DNAH9	17	11501747	11873065	6	3	0.046141		218	PEAK3	19	2274630	2282181
									219	NCLN	19	3185874	3209573	7	0	0.00323427		219	CLEC10A	17	6977855	6983626	6	0	0.0345023		219	LINS1	15	101109427	101142445	6	2	0.00770991		219	MYOCD	17	12569206	12672266	6	3	0.046141		219	LINGO3	19	2289773	2308156
									220	SMIM24	19	3474404	3480540	7	0	0.00323427		220	ASGR2	17	7004640	7017629	6	0	0.0345023		220	CHSY1	15	101715927	101792137	6	2	0.00770991		220	TOM1L2	17	17746821	17875784	6	3	0.046141		220	LSM7	19	2321519	2328614
									221	DOHH	19	3490818	3500621	7	0	0.00323427		221	DLG4	17	7093208	7108487	6	0	0.0345023		221	SELENOS	15	101811113	101817725	6	2	0.00770991		221	RAP1GAP2	17	2680214	2941035	6	3	0.046141		221	SPPL2B	19	2328628	2355100
									222	FZR1	19	3506294	3536755	7	0	0.00323427		222	ACADVL	17	7120443	7128586	6	0	0.0345023		222	SNRPA1	15	101821714	101835487	6	2	0.00770991		222	SPATA22	17	3343304	3417146	6	3	0.046141		222	TMPRSS9	19	2389768	2426256
									223	C19orf71	19	3539154	3544028	7	0	0.00323427		223	DVL2	17	7128660	7137863	6	0	0.0345023		223	IQCA1	2	237232789	237412340	4	0	0.00842809		223	SHPK	17	3511555	3539616	6	3	0.046141		223	TIMM13	19	2425621	2427914
									224	MFSD12	19	3544196	3557582	7	0	0.00323427		224	PHF23	17	7138346	7142249	6	0	0.0345023		224	ACKR3	2	237478379	237490997	4	0	0.00842809		224	ITGAE	17	3617918	3704537	6	3	0.046141		224	LMNB2	19	2428162	2456966
									225	HMG20B	19	3572942	3579081	7	0	0.00323427		225	GABARAP	17	7143737	7145753	6	0	0.0345023		225	MUC16	19	8959519	9092018	7	3	0.00850362		225	P2RX1	17	3799884	3819960	6	3	0.046141		225	GADD45B	19	2476122	2478257
									226	GIPC3	19	3585568	3593539	7	0	0.00323427		226	CTDNEP1	17	7146905	7154995	6	0	0.0345023		226	MBD3L1	19	8953268	8954016	7	3	0.00850362		226	ZZEF1	17	3907738	4046253	6	3	0.046141		226	CREB3L3	19	4153597	4173051
									227	TBXA2R	19	3594503	3606831	7	0	0.00323427		227	ELP5	17	7155371	7163259	6	0	0.0345023		227	DSC3	18	28569330	28622781	5	1	0.00966859		227	PITPNM3	17	6354582	6459877	6	3	0.046141		227	SIRT6	19	4174105	4182303
									228	CACTIN	19	3610625	3626813	7	0	0.00323427		228	CLDN7	17	7163221	7166264	6	0	0.0345023		228	DSG4	18	28956739	28994872	5	1	0.00966859		228	MED31	17	6546632	6554954	6	3	0.046141		228	EBI3	19	4229539	4237525
									229	TJP3	19	3708334	3750811	7	0	0.00323427		229	EIF5A	17	7210317	7215782	6	0	0.0345023		229	DSG2	18	29077966	29128971	5	1	0.00966859		229	FBXO39	17	6679551	6690965	6	3	0.046141		229	YJU2	19	4247066	4269090
									230	APBA3	19	3750770	3761673	7	0	0.00323427		230	GPS2	17	7215977	7218658	6	0	0.0345023		230	B4GALT6	18	29200998	29264686	5	1	0.00966859		230	SLC16A11	17	6944948	6947242	6	3	0.046141		230	SHD	19	4278597	4290720
									231	MRPL54	19	3762664	3767563	7	0	0.00323427		231	NEURL4	17	7218950	7232638	6	0	0.0345023		231	TRAPPC8	18	29409135	29523091	5	1	0.00966859		231	ASGR1	17	7076749	7082883	6	3	0.046141		231	TMIGD2	19	4292223	4302428
									232	RAX2	19	3769086	3772219	7	0	0.00323427		232	ACAP1	17	7239847	7254793	6	0	0.0345023		232	RNF125	18	29598444	29653154	5	1	0.00966859		232	SENP3	17	7465308	7475287	6	3	0.046141		232	FSD1	19	4304590	4323843
									233	ZFR2	19	3804021	3869027	7	0	0.00323427		233	KCTD11	17	7255207	7258263	6	0	0.0345023		233	GAREM1	18	29843483	30050447	5	1	0.00966859		233	WRAP53	17	7589388	7606820	6	3	0.046141		233	MPND	19	4343523	4360083
									234	ATCAY	19	3880617	3928080	7	0	0.00323427		234	TMEM95	17	7258454	7260538	6	0	0.0345023		234	DSC2	18	28645939	28682395	5	1	0.00966859		234	DNAH2	17	7620671	7737062	6	3	0.046141		234	SH3GL1	19	4360363	4400415
									235	NMRK2	19	3933100	3942414	7	0	0.00323427		235	TNK1	17	7284292	7293093	6	0	0.0345023		235	DSC1	18	28709198	28742819	5	1	0.00966859		235	NTN1	17	8924858	9147317	6	3	0.046141		235	CHAF1A	19	4402659	4443394
									236	DAPK3	19	3958450	3971121	7	0	0.00323427		236	PLSCR3	17	7293045	7298162	6	0	0.0345023		236	DSG1	18	28898051	28939209	5	1	0.00966859		236	USP43	17	9548853	9633004	6	3	0.046141		236	HDGFL2	19	4472192	4502232
									237	EEF2	19	3976053	3985461	7	0	0.00323427		237	TMEM256	17	7306292	7307450	6	0	0.0345023		237	DSG3	18	29027731	29058665	5	1	0.00966859		237	GAS7	17	9813925	9862766	6	3	0.046141		237	PLIN4	19	4502191	4517716
									238	PIAS4	19	4007595	4039384	7	0	0.00323427		238	NLGN2	17	7311501	7323183	6	0	0.0345023		238	TTR	18	29171729	29178987	5	1	0.00966859		238	MYH13	17	10204182	10276322	6	3	0.046141		238	PLIN5	19	4522542	4535208
									239	MAP2K2	19	4090318	4124126	7	0	0.00323427		239	SPEM1	17	7323678	7324951	6	0	0.0345023		239	SLC25A52	18	29339658	29340843	5	1	0.00966859		239	MYH4	17	10346606	10372876	6	3	0.046141		239	LRG1	19	4537226	4540036
									240	CREB3L3	19	4153597	4173051	7	0	0.00323427		240	SPEM2	17	7328934	7330887	6	0	0.0345023		240	RNF138	18	29671817	29711524	5	1	0.00966859		240	TMEM220	17	10616611	10633646	6	3	0.046141		240	SEMA6B	19	4542599	4559771
									241	SIRT6	19	4174105	4182303	7	0	0.00323427		241	FGF11	17	7342345	7348251	6	0	0.0345023		241	MEP1B	18	29769986	29800367	5	1	0.00966859		241	MAP2K4	17	11924134	12047148	6	3	0.046141		241	NAA16	13	41885340	41951166
									242	EBI3	19	4229539	4237525	7	0	0.00323427		242	CHRNB1	17	7348405	7360932	6	0	0.0345023		242	CCDC151	19	11531271	11545980	5	1	0.00966859		242	ARHGAP44	17	12692828	12894961	6	3	0.046141		242	KPNA3	13	50273442	50367057
									243	YJU2	19	4247066	4269090	7	0	0.00323427		243	ZBTB4	17	7362684	7382944	6	0	0.0345023		243	ELOF1	19	11663857	11670051	5	1	0.00966859		243	HS3ST3A1	17	13397348	13505259	6	3	0.046141		243	ENOX1	13	43787268	44203613
									244	SHD	19	4278597	4290720	7	0	0.00323427		244	SLC35G6	17	7384720	7386383	6	0	0.0345023		244	LDLR	19	11200037	11244506	5	1	0.00966859		244	COX10	17	13972718	14111996	6	3	0.046141		244	TSC22D1	13	45006278	45150701
									245	TMIGD2	19	4292223	4302428	7	0	0.00323427		245	POLR2A	17	7387697	7417935	6	0	0.0345023		245	SPC24	19	11256169	11266488	5	1	0.00966859		245	TVP23C-CDRT4	17	15339331	15466945	6	3	0.046141		245	ERICH6B	13	46115431	46189874
									246	FSD1	19	4304590	4323843	7	0	0.00323427		246	TNFSF12	17	7452374	7461207	6	0	0.0345023		246	KANK2	19	11274942	11305266	5	1	0.00966859		246	TVP23C	17	15405577	15466945	6	3	0.046141		246	LRCH1	13	47127295	47319036
									247	MPND	19	4343523	4360083	7	0	0.00323427		247	TNFSF12-TNFSF13	17	7452374	7464925	6	0	0.0345023		247	DOCK6	19	11309968	11373168	5	1	0.00966859		247	ADORA2B	17	15848230	15879210	6	3	0.046141		247	CYSLTR2	13	49227846	49285362
									248	SH3GL1	19	4360363	4400415	7	0	0.00323427		248	TNFSF13	17	7461608	7464925	6	0	0.0345023		248	ANGPTL8	19	11350294	11352619	5	1	0.00966859		248	MPRIP	17	16946073	17095962	6	3	0.046141		248	DLEU7	13	51285161	51418075
									249	CHAF1A	19	4402659	4443394	7	0	0.00323427		249	EIF4A1	17	7476023	7482324	6	0	0.0345023		249	TSPAN16	19	11406814	11426645	5	1	0.00966859		249	COPS3	17	17149937	17184012	6	3	0.046141		249	FOXO1	13	41129800	41240734
									250	HDGFL2	19	4472192	4502232	7	0	0.00323427		250	CD68	17	7482804	7485429	6	0	0.0345023		250	RAB3D	19	11432721	11450344	5	1	0.00966859		250	PEMT	17	17408876	17480779	6	3	0.046141		250	ELF1	13	41506054	41556418
									251	PLIN4	19	4502191	4517716	7	0	0.00323427		251	LOC100996842	17	7485284	7486836	6	0	0.0345023		251	TMEM205	19	11453451	11456981	5	1	0.00966859		251	RAI1	17	17584786	17714767	6	3	0.046141		251	MTRF1	13	41790515	41837713
									252	PLIN5	19	4522542	4535208	7	0	0.00323427		252	MPDU1	17	7486964	7491530	6	0	0.0345023		252	CCDC159	19	11457180	11465620	5	1	0.00966859		252	GID4	17	17942610	17971718	6	3	0.046141		252	VWA8	13	42140960	42535221
									253	LRG1	19	4537226	4540036	7	0	0.00323427		253	SOX15	17	7491497	7493488	6	0	0.0345023		253	PLPPR2	19	11466061	11476374	5	1	0.00966859		253	ALKBH5	17	18086866	18113268	6	3	0.046141		253	DGKH	13	42614171	42817033
									254	SEMA6B	19	4542599	4559771	7	0	0.00323427		254	FXR2	17	7494547	7518215	6	0	0.0345023		254	SWSAP1	19	11485382	11487627	5	1	0.00966859		254	SMCR8	17	18218593	18231370	6	3	0.046141		254	CCDC122	13	44410487	44453826
									255	MBD3L1	19	8953268	8954016	7	0	0.00323427		255	SHBG	17	7517381	7536701	6	0	0.0345023		255	EPOR	19	11487880	11495018	5	1	0.00966859		255	PAFAH1B1	17	2496922	2588909	6	3	0.046141		255	SERP2	13	44947785	44971850
									256	SORBS2	4	186506597	186697066	6	0	0.0113636		256	SAT2	17	7529551	7531194	6	0	0.0345023		256	RGL3	19	11504731	11530018	5	1	0.00966859		256	CLUH	17	2592679	2614927	6	3	0.046141		256	GTF2F2	13	45694630	45858240
									257	CCDC110	4	186366335	186392913	6	0	0.0113636		257	ATP1B2	17	7549944	7561089	6	0	0.0345023		257	PRKCSH	19	11546077	11561783	5	1	0.00966859		257	OR1D5	17	2965962	2966901	6	3	0.046141		257	SIAH3	13	46354404	46425846
									258	KLKB1	4	187148624	187179628	6	0	0.0113636		258	TP53	17	7571719	7578811	6	0	0.0345023		258	ELAVL3	19	11562142	11591803	5	1	0.00966859		258	OR1D2	17	2995351	2996290	6	3	0.046141		258	ZC3H13	13	46528599	46626913
									259	FAT1	4	187508936	187644987	6	0	0.0113636		259	EFNB3	17	7608519	7614693	6	0	0.0345023		259	ZNF653	19	11594241	11616738	5	1	0.00966859		259	OR1G1	17	3029903	3030845	6	3	0.046141		259	CPB2	13	46627321	46679211
									260	UFSP2	4	186320693	186347139	6	0	0.0113636		260	KDM6B	17	7743234	7758118	6	0	0.0345023		260	ECSIT	19	11616730	11639680	5	1	0.00966859		260	OR1A2	17	3100810	3101742	6	3	0.046141		260	LRRC63	13	46786077	46850938
									261	C4orf47	4	186350487	186370982	6	0	0.0113636		261	TMEM88	17	7758383	7759417	6	0	0.0345023		261	CNN1	19	11649531	11661138	5	1	0.00966859		261	OR1A1	17	3118914	3119844	6	3	0.046141		261	RUBCNL	13	46916134	46961635
									262	PDLIM3	4	186421813	186456712	6	0	0.0113636		262	NAA38	17	7759998	7761209	6	0	0.0345023		262	ACP5	19	11685474	11688556	5	1	0.00966859		262	OR3A2	17	3181183	3182268	6	3	0.046141		262	HTR2A	13	47405676	47471211
									263	TLR3	4	186990308	187006252	6	0	0.0113636		263	CYB5D1	17	7761044	7765600	6	0	0.0345023		263	ZNF627	19	11708234	11729974	5	1	0.00966859		263	OR3A1	17	3194928	3195876	6	3	0.046141		263	RB1	13	48877882	49056026
									264	FAM149A	4	187065994	187093817	6	0	0.0113636		264	CHD3	17	7788122	7816075	6	0	0.0345023		264	NAA16	13	41885340	41951166	7	4	0.0135011		264	OR1E1	17	3300759	3301704	6	3	0.046141		264	CAB39L	13	49882785	49975674
									265	CYP4V2	4	187112673	187134617	6	0	0.0113636		265	KCNAB3	17	7825176	7832753	6	0	0.0345023		265	KPNA3	13	50273442	50367057	7	4	0.0135011		265	OR3A3	17	3323861	3324827	6	3	0.046141		265	SETDB2-PHF11	13	50018428	50103128
									266	F11	4	187187117	187210835	6	0	0.0113636		266	TRAPPC1	17	7833662	7835267	6	0	0.0345023		266	ENOX1	13	43787268	44203613	7	4	0.0135011		266	OR1E2	17	3336163	3337135	6	3	0.046141		266	KCNRG	13	50589389	50595058
									267	MTNR1A	4	187454808	187476721	6	0	0.0113636		267	CNTROB	17	7835441	7853237	6	0	0.0345023		267	TSC22D1	13	45006278	45150701	7	4	0.0135011		267	ASPA	17	3377403	3402700	6	3	0.046141		267	RNASEH2B	13	51483813	51530901
									268	ZFP42	4	188916924	188926204	6	0	0.0113636		268	GUCY2D	17	7905987	7923658	6	0	0.0345023		268	ERICH6B	13	46115431	46189874	7	4	0.0135011		268	TRPV3	17	3413795	3461289	6	3	0.046141		268	WDFY2	13	52158483	52336171
									269	TRIML2	4	189012425	189026741	6	0	0.0113636		269	ALOX15B	17	7942357	7952452	6	0	0.0345023		269	LRCH1	13	47127295	47319036	7	4	0.0135011		269	TRPV1	17	3468739	3496171	6	3	0.046141		269	ATP7B	13	52506804	52585630
									270	TRIML1	4	189060594	189068897	6	0	0.0113636		270	ALOX12B	17	7975953	7991021	6	0	0.0345023		270	CYSLTR2	13	49227846	49285362	7	4	0.0135011		270	CTNS	17	3539761	3566397	6	3	0.046141		270	NEK5	13	52638897	52703228
									271	FRG1	4	190861973	190884359	6	0	0.0113636		271	ALOXE3	17	7999217	8021860	6	0	0.0345023		271	DLEU7	13	51285161	51418075	7	4	0.0135011		271	TAX1BP3	17	3566186	3571973	6	3	0.046141		271	THSD1	13	52951301	52980629
									272	PIBF1	13	73356229	73590592	6	0	0.0113636		272	HES7	17	8023907	8027410	6	0	0.0345023		272	FOXO1	13	41129800	41240734	7	4	0.0135011		272	EMC6	17	3572016	3572963	6	3	0.046141		272	HNRNPA1L2	13	53191604	53217919
									273	KLF12	13	74260148	74708066	6	0	0.0113636		273	PER1	17	8043787	8055753	6	0	0.0345023		273	ELF1	13	41506054	41556418	7	4	0.0135011		273	P2RX5	17	3576520	3599698	6	3	0.046141		273	DIAPH3	13	60239716	60738119
									274	FBXL3	13	77579388	77601331	6	0	0.0113636		274	VAMP2	17	8062464	8066194	6	0	0.0345023		274	MTRF1	13	41790515	41837713	7	4	0.0135011		274	HASPIN	17	3627196	3629993	6	3	0.046141		274	CLDN10	13	96085852	96232010
									275	GPC6	13	93879060	95060274	6	0	0.0113636		275	TMEM107	17	8076295	8079714	6	0	0.0345023		275	VWA8	13	42140960	42535221	7	4	0.0135011		275	NCBP3	17	3710041	3749545	6	3	0.046141		275	DNAJC3	13	96329392	96447243
									276	UGGT2	13	96453833	96705736	6	0	0.0113636		276	BORCS6	17	8091650	8093564	6	0	0.0345023		276	DGKH	13	42614171	42817033	7	4	0.0135011		276	CAMKK1	17	3763608	3794037	6	3	0.046141		276	MBNL2	13	97874542	98046374
									277	NALCN	13	101706129	102068813	6	0	0.0113636		277	AURKB	17	8108048	8113543	6	0	0.0345023		277	CCDC122	13	44410487	44453826	7	4	0.0135011		277	ATP2A3	17	3827162	3867758	6	3	0.046141		277	MRPS31	13	41303431	41345347
									278	FAM155A	13	107820878	108519460	6	0	0.0113636		278	CTC1	17	8128138	8151413	6	0	0.0345023		278	SERP2	13	44947785	44971850	7	4	0.0135011		278	CYB5D2	17	4046461	4060991	6	3	0.046141		278	SLC25A15	13	41363546	41386596
									279	FNDC3A	13	49550047	49783915	6	0	0.0113636		279	PFAS	17	8152595	8173809	6	0	0.0345023		279	GTF2F2	13	45694630	45858240	7	4	0.0135011		279	ANKFY1	17	4067111	4167142	6	3	0.046141		279	WBP4	13	41635392	41658148
									280	TBC1D4	13	75858799	76056304	6	0	0.0113636		280	SLC25A35	17	8191080	8198661	6	0	0.0345023		280	SIAH3	13	46354404	46425846	7	4	0.0135011		280	USP6	17	5019732	5078327	6	3	0.046141		280	KBTBD6	13	41701708	41706936
									281	UCHL3	13	76123615	76180156	6	0	0.0113636		281	RANGRF	17	8191814	8193410	6	0	0.0345023		281	ZC3H13	13	46528599	46626913	7	4	0.0135011		281	ZNF594	17	5082830	5095178	6	3	0.046141		281	KBTBD7	13	41765526	41768711
									282	LMO7	13	76194569	76434006	6	0	0.0113636		282	ARHGEF15	17	8213555	8225834	6	0	0.0345023		282	CPB2	13	46627321	46679211	7	4	0.0135011		282	SCIMP	17	5112214	5138155	6	3	0.046141		282	RGCC	13	42031541	42045013
									283	MYCBP2	13	77618791	77901177	6	0	0.0113636		283	ODF4	17	8243157	8249363	6	0	0.0345023		283	LRRC63	13	46786077	46850938	7	4	0.0135011		283	NUP88	17	5288152	5323059	6	3	0.046141		283	LACC1	13	44453419	44468068
									284	SCEL	13	78109808	78219398	6	0	0.0113636		284	KRBA2	17	8271954	8274858	6	0	0.0345023		284	RUBCNL	13	46916134	46961635	7	4	0.0135011		284	RPAIN	17	5322960	5332985	6	3	0.046141		284	SMIM2	13	44717286	44735393
									285	EDNRB	13	78469615	78549858	6	0	0.0113636		285	RPL26	17	8280833	8286482	6	0	0.0345023		285	HTR2A	13	47405676	47471211	7	4	0.0135011		285	C1QBP	17	5336098	5342471	6	3	0.046141		285	NUFIP1	13	45513383	45563613
									286	RBM26	13	79893002	79980356	6	0	0.0113636		286	RNF222	17	8294021	8301144	6	0	0.0345023		286	RB1	13	48877882	49056026	7	4	0.0135011		286	DHX33	17	5344231	5372380	6	3	0.046141		286	GPALPP1	13	45563664	45602405
									287	NDFIP2	13	80055258	80130212	6	0	0.0113636		287	NDEL1	17	8339169	8371495	6	0	0.0345023		287	CAB39L	13	49882785	49975674	7	4	0.0135011		287	DERL2	17	5374570	5389550	6	3	0.046141		287	KCTD4	13	45766987	45775175
									288	DCT	13	95089557	95201667	6	0	0.0113636		288	CCDC42	17	8633245	8648154	6	0	0.0345023		288	SETDB2-PHF11	13	50018428	50103128	7	4	0.0135011		288	MIS12	17	5389693	5394131	6	3	0.046141		288	TPT1	13	45907605	45915419
									289	ABCC4	13	95672082	95953700	6	0	0.0113636		289	SPDYE4	17	8656423	8661877	6	0	0.0345023		289	KCNRG	13	50589389	50595058	7	4	0.0135011		289	LOC728392	17	5402746	5404319	6	3	0.046141		289	SLC25A30	13	45967450	45992590
									290	CLDN10	13	96085852	96232010	6	0	0.0113636		290	MFSD6L	17	8700427	8702667	6	0	0.0345023		290	RNASEH2B	13	51483813	51530901	7	4	0.0135011		290	NLRP1	17	5404718	5487832	6	3	0.046141		290	COG3	13	46039029	46110833
									291	DNAJC3	13	96329392	96447243	6	0	0.0113636		291	PIK3R6	17	8706040	8770994	6	0	0.0345023		291	WDFY2	13	52158483	52336171	7	4	0.0135011		291	WSCD1	17	5973933	6027747	6	3	0.046141		291	SPERT	13	46276438	46288694
									292	HS6ST3	13	96743092	97491816	6	0	0.0113636		292	PIK3R5	17	8782232	8815834	6	0	0.0345023		292	ATP7B	13	52506804	52585630	7	4	0.0135011		292	AIPL1	17	6327056	6338452	6	3	0.046141		292	LCP1	13	46700057	46756459
									293	MBNL2	13	97874542	98046374	6	0	0.0113636		293	CFAP52	17	9479943	9546776	6	0	0.0345023		293	NEK5	13	52638897	52703228	7	4	0.0135011		293	PIMREG	17	6347734	6354385	6	3	0.046141		293	ESD	13	47345390	47371367
									294	CLYBL	13	100258917	100545018	6	0	0.0113636		294	DHRS7C	17	9674750	9694614	6	0	0.0345023		294	THSD1	13	52951301	52980629	7	4	0.0135011		294	KIAA0753	17	6481644	6544247	6	3	0.046141		294	ITM2B	13	48807273	48836232
									295	PCCA	13	100741268	101182691	6	0	0.0113636		295	GSG1L2	17	9705702	9725388	6	0	0.0345023		295	HNRNPA1L2	13	53191604	53217919	7	4	0.0135011		295	TXNDC17	17	6544221	6547861	6	3	0.046141		295	RCBTB2	13	49063098	49107392
									296	GGACT	13	101182417	101241046	6	0	0.0113636		296	GLP2R	17	9728867	9795420	6	0	0.0345023		296	DIAPH3	13	60239716	60738119	7	4	0.0135011		296	C17orf100	17	6555058	6556617	6	3	0.046141		296	CDADC1	13	49822046	49867622
									297	TMTC4	13	101256089	101327189	6	0	0.0113636		297	RCVRN	17	9801026	9808684	6	0	0.0345023		297	MRPS31	13	41303431	41345347	7	4	0.0135011		297	SLC13A5	17	6588031	6616740	6	3	0.046141		297	SETDB2	13	50018428	50069139
									298	ITGBL1	13	102104943	102368796	6	0	0.0113636		298	MYH8	17	10293641	10325267	6	0	0.0345023		298	SLC25A15	13	41363546	41386596	7	4	0.0135011		298	XAF1	17	6659155	6678966	6	3	0.046141		298	PHF11	13	50069745	50103128
									299	TPP2	13	103249285	103332308	6	0	0.0113636		299	MYH1	17	10395623	10421859	6	0	0.0345023		299	WBP4	13	41635392	41658148	7	4	0.0135011		299	TEKT1	17	6703299	6735060	6	3	0.046141		299	RCBTB1	13	50106081	50159719
									300	ARGLU1	13	107195661	107220514	6	0	0.0113636		300	MYH2	17	10424464	10452940	6	0	0.0345023		300	KBTBD6	13	41701708	41706936	7	4	0.0135011		300	ALOX12	17	6899383	6914055	6	3	0.046141		300	ARL11	13	50202434	50208008
									301	MYO16	13	109248499	109860355	6	0	0.0113636		301	MYH3	17	10531842	10560626	6	0	0.0345023		301	KBTBD7	13	41765526	41768711	7	4	0.0135011		301	RNASEK	17	6915735	6917852	6	3	0.046141		301	EBPL	13	50234811	50265623
									302	SUCLA2	13	48516790	48575462	6	0	0.0113636		302	SCO1	17	10583648	10600885	6	0	0.0345023		302	RGCC	13	42031541	42045013	7	4	0.0135011		302	C17orf49	17	6918055	6920843	6	3	0.046141		302	SPRYD7	13	50486837	50510637
									303	NUDT15	13	48611702	48615638	6	0	0.0113636		303	ADPRM	17	10600926	10614875	6	0	0.0345023		303	LACC1	13	44453419	44468068	7	4	0.0135011		303	BCL6B	17	6926368	6932961	6	3	0.046141		303	TRIM13	13	50571142	50592603
									304	MED4	13	48649863	48669277	6	0	0.0113636		304	PIRT	17	10725791	10741418	6	0	0.0345023		304	SMIM2	13	44717286	44735393	7	4	0.0135011		304	SLC16A13	17	6939393	6943440	6	3	0.046141		304	FAM124A	13	51796469	51827750
									305	LPAR6	13	48985180	48987653	6	0	0.0113636		305	ZNF18	17	11880755	11900689	6	0	0.0345023		305	NUFIP1	13	45513383	45563613	7	4	0.0135011		305	CLEC10A	17	6977855	6983626	6	3	0.046141		305	SERPINE3	13	51915167	51936239
									306	MLNR	13	49794473	49796513	6	0	0.0113636		306	ELAC2	17	12894928	12921381	6	0	0.0345023		306	GPALPP1	13	45563664	45602405	7	4	0.0135011		306	ASGR2	17	7004640	7017629	6	3	0.046141		306	INTS6	13	51935700	52027275
									307	MZT1	13	73282494	73301938	6	0	0.0113636		307	CDRT15	17	14139172	14140150	6	0	0.0345023		307	KCTD4	13	45766987	45775175	7	4	0.0135011		307	DLG4	17	7093208	7108487	6	3	0.046141		307	DHRS12	13	52342128	52378298
									308	BORA	13	73301886	73330336	6	0	0.0113636		308	HS3ST3B1	17	14204366	14252721	6	0	0.0345023		308	TPT1	13	45907605	45915419	7	4	0.0135011		308	ACADVL	17	7120443	7128586	6	3	0.046141		308	CCDC70	13	52436083	52440372
									309	DIS3	13	73329539	73356266	6	0	0.0113636		309	PMP22	17	15133093	15164161	6	0	0.0345023		309	SLC25A30	13	45967450	45992590	7	4	0.0135011		309	DVL2	17	7128660	7137863	6	3	0.046141		309	ALG11	13	52586522	52603780
									310	KLF5	13	73629113	73651680	6	0	0.0113636		310	TEKT3	17	15207128	15244958	6	0	0.0345023		310	COG3	13	46039029	46110833	7	4	0.0135011		310	PHF23	17	7138346	7142249	6	3	0.046141		310	UTP14C	13	52598826	52607736
									311	COMMD6	13	76099349	76112008	6	0	0.0113636		311	CDRT4	17	15339331	15370925	6	0	0.0345023		311	SPERT	13	46276438	46288694	7	4	0.0135011		311	GABARAP	17	7143737	7145753	6	3	0.046141		311	NEK3	13	52706778	52733670
									312	LMO7DN	13	76445173	76457948	6	0	0.0113636		312	CDRT1	17	15468795	15523018	6	0	0.0345023		312	LCP1	13	46700057	46756459	7	4	0.0135011		312	CTDNEP1	17	7146905	7154995	6	3	0.046141		312	VPS36	13	52986736	53024379
									313	KCTD12	13	77454303	77460540	6	0	0.0113636		313	TRIM16	17	15531279	15586265	6	0	0.0345023		313	ESD	13	47345390	47371367	7	4	0.0135011		313	ELP5	17	7155371	7163259	6	3	0.046141		313	CKAP2	13	53029494	53039978
									314	ACOD1	13	77522693	77532777	6	0	0.0113636		314	ZNF286A	17	15602890	15624101	6	0	0.0345023		314	ITM2B	13	48807273	48836232	7	4	0.0135011		314	CLDN7	17	7163221	7166264	6	3	0.046141		314	SUGT1	13	53226825	53262489
									315	CLN5	13	77566058	77576652	6	0	0.0113636		315	TBC1D26	17	15635590	15648098	6	0	0.0345023		315	RCBTB2	13	49063098	49107392	7	4	0.0135011		315	EIF5A	17	7210317	7215782	6	3	0.046141		315	CNMD	13	53277398	53313947
									316	LOC100129307	13	78235508	78236938	6	0	0.0113636		316	TNFRSF13B	17	16842397	16875402	6	0	0.0345023		316	CDADC1	13	49822046	49867622	7	4	0.0135011		316	GPS2	17	7215977	7218658	6	3	0.046141		316	PCDH8	13	53418108	53422775
									317	SLAIN1	13	78271988	78338377	6	0	0.0113636		317	PLD6	17	17104308	17109646	6	0	0.0345023		317	SETDB2	13	50018428	50069139	7	4	0.0135011		317	NEURL4	17	7218950	7232638	6	3	0.046141		317	PRR20A	13	57715051	57718073
									318	POU4F1	13	79173226	79177695	6	0	0.0113636		318	FLCN	17	17115525	17140502	6	0	0.0345023		318	PHF11	13	50069745	50103128	7	4	0.0135011		318	ACAP1	17	7239847	7254793	6	3	0.046141		318	PRR20B	13	57721621	57724643
									319	RNF219	13	79188420	79233314	6	0	0.0113636		319	NT5M	17	17206679	17250977	6	0	0.0345023		319	RCBTB1	13	50106081	50159719	7	4	0.0135011		319	KCTD11	17	7255207	7258263	6	3	0.046141		319	PRR20C	13	57728194	57731216
									320	SPRY2	13	80910110	80913794	6	0	0.0113636		320	MED9	17	17380299	17396534	6	0	0.0345023		320	ARL11	13	50202434	50208008	7	4	0.0135011		320	TMEM95	17	7258454	7260538	6	3	0.046141		320	PRR20D	13	57734765	57737787
									321	SLITRK1	13	84451339	84456528	6	0	0.0113636		321	RASD1	17	17397750	17399709	6	0	0.0345023		321	EBPL	13	50234811	50265623	7	4	0.0135011		321	TNK1	17	7284292	7293093	6	3	0.046141		321	PRR20E	13	57741330	57744352
									322	SLITRK5	13	88324869	88331871	6	0	0.0113636		322	SREBF1	17	17714662	17740325	6	0	0.0345023		322	SPRYD7	13	50486837	50510637	7	4	0.0135011		322	PLSCR3	17	7293045	7298162	6	3	0.046141		322	PCDH17	13	58205788	58303065
									323	TGDS	13	95226307	95248529	6	0	0.0113636		323	DRC3	17	17876126	17911142	6	0	0.0345023		323	TRIM13	13	50571142	50592603	7	4	0.0135011		323	TMEM256	17	7306292	7307450	6	3	0.046141		323	DZIP1	13	96230455	96296960
									324	GPR180	13	95254103	95286899	6	0	0.0113636		324	ATPAF2	17	17921333	17942480	6	0	0.0345023		324	FAM124A	13	51796469	51827750	7	4	0.0135011		324	NLGN2	17	7311501	7323183	6	3	0.046141		324	OXGR1	13	97637972	97646730
									325	SOX21	13	95361875	95364797	6	0	0.0113636		325	DRG2	17	17991180	18011299	6	0	0.0345023		325	SERPINE3	13	51915167	51936239	7	4	0.0135011		325	SPEM1	17	7323678	7324951	6	3	0.046141		325	ABCA7	19	1040101	1065571
									326	DZIP1	13	96230455	96296960	6	0	0.0113636		326	MYO15A	17	18012019	18083116	6	0	0.0345023		326	INTS6	13	51935700	52027275	7	4	0.0135011		326	SPEM2	17	7328934	7330887	6	3	0.046141		326	ZNF559	19	9434447	9454521
									327	OXGR1	13	97637972	97646730	6	0	0.0113636		327	LLGL1	17	18128935	18148189	6	0	0.0345023		327	DHRS12	13	52342128	52378298	7	4	0.0135011		327	FGF11	17	7342345	7348251	6	3	0.046141		327	ZNF559-ZNF177	19	9434901	9493293
									328	RAP2A	13	98086474	98120252	6	0	0.0113636		328	FLII	17	18148128	18161870	6	0	0.0345023		328	CCDC70	13	52436083	52440372	7	4	0.0135011		328	CHRNB1	17	7348405	7360932	6	3	0.046141		328	KISS1R	19	917341	921015
									329	ZIC5	13	100615274	100624178	6	0	0.0113636		329	MIEF2	17	18163847	18169095	6	0	0.0345023		329	ALG11	13	52586522	52603780	7	4	0.0135011		329	ZBTB4	17	7362684	7382944	6	3	0.046141		329	DPP9	19	4675242	4723855
									330	ZIC2	13	100634025	100639019	6	0	0.0113636		330	TOP3A	17	18174741	18218406	6	0	0.0345023		330	UTP14C	13	52598826	52607736	7	4	0.0135011		330	SLC35G6	17	7384720	7386383	6	3	0.046141		330	PALM	19	708952	748330
									331	METTL21C	13	103338096	103346871	6	0	0.0113636		331	SHMT1	17	18231173	18266877	6	0	0.0345023		331	NEK3	13	52706778	52733670	7	4	0.0135011		331	POLR2A	17	7387697	7417935	6	3	0.046141		331	MISP	19	751112	764319
									332	CCDC168	13	103381716	103411422	6	0	0.0113636		332	EVPLL	17	18281078	18292961	6	0	0.0345023		332	VPS36	13	52986736	53024379	7	4	0.0135011		332	TNFSF12	17	7452374	7461207	6	3	0.046141		332	PTBP1	19	797391	812327
									333	TEX30	13	103418237	103426171	6	0	0.0113636		333	LGALS9C	17	18380098	18398259	6	0	0.0345023		333	CKAP2	13	53029494	53039978	7	4	0.0135011		333	TNFSF12-TNFSF13	17	7452374	7464925	6	3	0.046141		333	PLPPR3	19	812487	821952
									334	KDELC1	13	103436630	103451404	6	0	0.0113636		334	FAM106A	17	18427879	18430160	6	0	0.0345023		334	SUGT1	13	53226825	53262489	7	4	0.0135011		334	TNFSF13	17	7461608	7464925	6	3	0.046141		334	AZU1	19	827825	832018
									335	BIVM	13	103451398	103493888	6	0	0.0113636		335	TBC1D28	17	18538841	18547740	6	0	0.0345023		335	CNMD	13	53277398	53313947	7	4	0.0135011		335	EIF4A1	17	7476023	7482324	6	3	0.046141		335	PRTN3	19	840984	848175
									336	BIVM-ERCC5	13	103459495	103528351	6	0	0.0113636		336	ZNF286B	17	18561741	18585572	6	0	0.0345023		336	PCDH8	13	53418108	53422775	7	4	0.0135011		336	CD68	17	7482804	7485429	6	3	0.046141		336	ELANE	19	852208	856246
									337	ERCC5	13	103498190	103528351	6	0	0.0113636		337	TRIM16L	17	18625401	18639431	6	0	0.0345023		337	PRR20A	13	57715051	57718073	7	4	0.0135011		337	LOC100996842	17	7485284	7486836	6	3	0.046141		337	CFD	19	859658	863569
									338	SLC10A2	13	103696347	103719196	6	0	0.0113636		338	FBXW10	17	18647325	18682662	6	0	0.0345023		338	PRR20B	13	57721621	57724643	7	4	0.0135011		338	MPDU1	17	7486964	7491530	6	3	0.046141		338	MED16	19	867961	893218
									339	DAOA	13	106118215	106143383	6	0	0.0113636		339	TVP23B	17	18684307	18704742	6	0	0.0345023		339	PRR20C	13	57728194	57731216	7	4	0.0135011		339	SOX15	17	7491497	7493488	6	3	0.046141		339	R3HDM4	19	896502	913225
									340	EFNB2	13	107142078	107187388	6	0	0.0113636		340	PRPSAP2	17	18759611	18834600	6	0	0.0345023		340	PRR20D	13	57734765	57737787	7	4	0.0135011		340	FXR2	17	7494547	7518215	6	3	0.046141		340	ARID3A	19	926036	972816
									341	LIG4	13	108859789	108867130	6	0	0.0113636		341	ABCA7	19	1040101	1065571	6	0	0.0345023		341	PRR20E	13	57741330	57744352	7	4	0.0135011		341	SHBG	17	7517381	7536701	6	3	0.046141		341	WDR18	19	984327	994569
									342	ABHD13	13	108870762	108886603	6	0	0.0113636		342	IZUMO4	19	2096867	2099583	6	0	0.0345023		342	PCDH17	13	58205788	58303065	7	4	0.0135011		342	SAT2	17	7529551	7531194	6	3	0.046141		342	GRIN3B	19	1000417	1009731
									343	TNFSF13B	13	108921976	108960832	6	0	0.0113636		343	GNA15	19	3136029	3163767	6	0	0.0345023		343	SORBS2	4	186506597	186697066	6	3	0.0276776		343	ATP1B2	17	7549944	7561089	6	3	0.046141		343	TMEM259	19	1009649	1021141
									344	ADAMTS17	15	100511642	100882210	6	0	0.0113636		344	KISS1R	19	917341	921015	6	0	0.0345023		344	CCDC110	4	186366335	186392913	6	3	0.0276776		344	TP53	17	7571719	7578811	6	3	0.046141		344	CNN2	19	1026273	1039067
									345	SECISBP2L	15	49280834	49338760	6	0	0.0113636		345	REXO1	19	1815244	1848452	6	0	0.0345023		345	KLKB1	4	187148624	187179628	6	3	0.0276776		345	EFNB3	17	7608519	7614693	6	3	0.046141		345	ARHGAP45	19	1065921	1087830
									346	ETFA	15	76508627	76603810	6	0	0.0113636		346	CSNK1G2	19	1941160	1981337	6	0	0.0345023		346	FAT1	4	187508936	187644987	6	3	0.0276776		346	KDM6B	17	7743234	7758118	6	3	0.046141		346	POLR2E	19	1086577	1095391
									347	PEAK1	15	77400497	77712446	6	0	0.0113636		347	DOT1L	19	2164147	2232577	6	0	0.0345023		347	UFSP2	4	186320693	186347139	6	3	0.0276776		347	TMEM88	17	7758383	7759417	6	3	0.046141		347	GPX4	19	1103924	1106788
									348	TMED3	15	79603403	79706228	6	0	0.0113636		348	GNG7	19	2511217	2702746	6	0	0.0345023		348	C4orf47	4	186350487	186370982	6	3	0.0276776		348	NAA38	17	7759998	7761209	6	3	0.046141		348	SBNO2	19	1107632	1174282
									349	ARNT2	15	80696691	80890278	6	0	0.0113636		349	TLE2	19	2997635	3029165	6	0	0.0345023		349	PDLIM3	4	186421813	186456712	6	3	0.0276776		349	CYB5D1	17	7761044	7765600	6	3	0.046141		349	STK11	19	1205797	1228434
									350	AKAP13	15	85923846	86292589	6	0	0.0113636		350	CELF5	19	3224700	3297074	6	0	0.0345023		350	TLR3	4	186990308	187006252	6	3	0.0276776		350	CHD3	17	7788122	7816075	6	3	0.046141		350	TNFAIP8L1	19	4639526	4655580
									351	AGBL1	15	86623038	87572283	6	0	0.0113636		351	NFIC	19	3359560	3469215	6	0	0.0345023		351	FAM149A	4	187065994	187093817	6	3	0.0276776		351	KCNAB3	17	7825176	7832753	6	3	0.046141		351	MYDGF	19	4657556	4670415
									352	KIF7	15	90171200	90198682	6	0	0.0113636		352	PIP5K1C	19	3630178	3700477	6	0	0.0345023		352	CYP4V2	4	187112673	187134617	6	3	0.0276776		352	TRAPPC1	17	7833662	7835267	6	3	0.046141		352	DPP9-AS1	19	4679293	4685960
									353	SEMA6D	15	47476402	48066420	6	0	0.0113636		353	MATK	19	3777966	3801810	6	0	0.0345023		353	F11	4	187187117	187210835	6	3	0.0276776		353	CNTROB	17	7835441	7853237	6	3	0.046141		353	OR1M1	19	9203920	9204862
									354	DUT	15	48623291	48635566	6	0	0.0113636		354	ZBTB7A	19	4043301	4065527	6	0	0.0345023		354	MTNR1A	4	187454808	187476721	6	3	0.0276776		354	GUCY2D	17	7905987	7923658	6	3	0.046141		354	OR7G2	19	9212944	9213982
									355	FBN1	15	48700502	48937985	6	0	0.0113636		355	PALM	19	708952	748330	6	0	0.0345023		355	ZFP42	4	188916924	188926204	6	3	0.0276776		355	ALOX15B	17	7942357	7952452	6	3	0.046141		355	OR7G1	19	9225503	9226439
									356	SHC4	15	49115933	49255641	6	0	0.0113636		356	MISP	19	751112	764319	6	0	0.0345023		356	TRIML2	4	189012425	189026741	6	3	0.0276776		356	ALOX12B	17	7975953	7991021	6	3	0.046141		356	OR7G3	19	9236687	9237626
									357	TMEM266	15	76352298	76497304	6	0	0.0113636		357	PTBP1	19	797391	812327	6	0	0.0345023		357	TRIML1	4	189060594	189068897	6	3	0.0276776		357	ALOXE3	17	7999217	8021860	6	3	0.046141		357	ZNF317	19	9251055	9274091
									358	SCAPER	15	76640525	77154285	6	0	0.0113636		358	PLPPR3	19	812487	821952	6	0	0.0345023		358	FRG1	4	190861973	190884359	6	3	0.0276776		358	HES7	17	8023907	8027410	6	3	0.046141		358	OR7D2	19	9296269	9299493
									359	CHRNA3	15	78885393	78913637	6	0	0.0113636		359	AZU1	19	827825	832018	6	0	0.0345023		359	SECISBP2L	15	49280834	49338760	6	3	0.0276776		359	PER1	17	8043787	8055753	6	3	0.046141		359	OR7D4	19	9324525	9325547
									360	MORF4L1	15	79165122	79190081	6	0	0.0113636		360	PRTN3	19	840984	848175	6	0	0.0345023		360	PEAK1	15	77400497	77712446	6	3	0.0276776		360	VAMP2	17	8062464	8066194	6	3	0.046141		360	OR7E24	19	9361719	9362739
									361	RASGRF1	15	79252288	79383215	6	0	0.0113636		361	ELANE	19	852208	856246	6	0	0.0345023		361	DUT	15	48623291	48635566	6	3	0.0276776		361	TMEM107	17	8076295	8079714	6	3	0.046141		361	ZNF699	19	9401815	9420390
									362	FAH	15	80445232	80478924	6	0	0.0113636		362	CFD	19	859658	863569	6	0	0.0345023		362	FBN1	15	48700502	48937985	6	3	0.0276776		362	BORCS6	17	8091650	8093564	6	3	0.046141		362	ZNF177	19	9473695	9493293
									363	ABHD17C	15	80987651	81047962	6	0	0.0113636		363	MED16	19	867961	893218	6	0	0.0345023		363	SHC4	15	49115933	49255641	6	3	0.0276776		363	AURKB	17	8108048	8113543	6	3	0.046141		363	ZNF266	19	9523101	9546254
									364	CEMIP	15	81071683	81244003	6	0	0.0113636		364	R3HDM4	19	896502	913225	6	0	0.0345023		364	SCAPER	15	76640525	77154285	6	3	0.0276776		364	CTC1	17	8128138	8151413	6	3	0.046141		364	PTAR1	9	72324437	72374876
									365	IL16	15	81489218	81605104	6	0	0.0113636		365	ARID3A	19	926036	972816	6	0	0.0345023		365	SLC24A5	15	48413168	48434589	6	3	0.0276776		365	PFAS	17	8152595	8173809	6	3	0.046141		365	TRPM3	9	73149948	73483974
									366	TMC3	15	81624759	81666418	6	0	0.0113636		366	WDR18	19	984327	994569	6	0	0.0345023		366	MYEF2	15	48431624	48470558	6	3	0.0276776		366	SLC25A35	17	8191080	8198661	6	3	0.046141		366	IPPK	9	95375465	95432547
									367	EFL1	15	82422560	82554869	6	0	0.0113636		367	GRIN3B	19	1000417	1009731	6	0	0.0345023		367	CTXN2	15	48483866	48495951	6	3	0.0276776		367	RANGRF	17	8191814	8193410	6	3	0.046141		367	C9orf3	9	97488950	97695955
									368	SAXO2	15	82555151	82577268	6	0	0.0113636		368	TMEM259	19	1009649	1021141	6	0	0.0345023		368	SLC12A1	15	48498497	48596275	6	3	0.0276776		368	ARHGEF15	17	8213555	8225834	6	3	0.046141		368	ZNF782	9	99578550	99616770
									369	CPEB1	15	83211950	83240573	6	0	0.0113636		369	CNN2	19	1026273	1039067	6	0	0.0345023		369	CEP152	15	49030134	49103343	6	3	0.0276776		369	ODF4	17	8243157	8249363	6	3	0.046141		369	PPP6C	9	127908851	127952218
									370	AP3B2	15	83328032	83378660	6	0	0.0113636		370	ARHGAP45	19	1065921	1087830	6	0	0.0345023		370	EID1	15	49170289	49172380	6	3	0.0276776		370	KRBA2	17	8271954	8274858	6	3	0.046141		370	TTF1	9	135250934	135282238
									371	WHAMM	15	83478379	83503613	6	0	0.0113636		371	POLR2E	19	1086577	1095391	6	0	0.0345023		371	RCN2	15	77223961	77242601	6	3	0.0276776		371	RPL26	17	8280833	8286482	6	3	0.046141		371	PGM5	9	70971814	71145977
									372	SH3GL3	15	84115979	84287495	6	0	0.0113636		372	GPX4	19	1103924	1106788	6	0	0.0345023		372	PSTPIP1	15	77287020	77329816	6	3	0.0276776		372	RNF222	17	8294021	8301144	6	3	0.046141		372	PIP5K1B	9	71320329	71624092
									373	ADAMTSL3	15	84322837	84708594	6	0	0.0113636		373	SBNO2	19	1107632	1132273	6	0	0.0345023		373	TSPAN3	15	77336358	77363570	6	3	0.0276776		373	NDEL1	17	8339169	8371495	6	3	0.046141		373	FXN	9	71650478	71715094
									374	WDR73	15	85184725	85197574	6	0	0.0113636		374	STK11	19	1205797	1228434	6	0	0.0345023		374	KANK3	19	8387467	8408146	6	3	0.0276776		374	CCDC42	17	8633245	8648154	6	3	0.046141		374	TJP2	9	71736179	71870124
									375	ZNF592	15	85291817	85349663	6	0	0.0113636		375	CBARP	19	1229946	1237990	6	0	0.0345023		375	VAV1	19	6772678	6857377	6	3	0.0276776		375	SPDYE4	17	8656423	8661877	6	3	0.046141		375	FAM189A2	9	71939487	72007389
									376	SLC28A1	15	85427891	85489027	6	0	0.0113636		376	ATP5F1D	19	1241748	1244824	6	0	0.0345023		376	ZNF557	19	7069470	7087979	6	3	0.0276776		376	MFSD6L	17	8700427	8702667	6	3	0.046141		376	APBA1	9	72042448	72287275
									377	PDE8A	15	85523743	85682376	6	0	0.0113636		377	MIDN	19	1248551	1259142	6	0	0.0345023		377	INSR	19	7112265	7294313	6	3	0.0276776		377	PIK3R6	17	8706040	8770994	6	3	0.046141		377	C9orf135	9	72435720	72521151
									378	NTRK3	15	88419987	88799962	6	0	0.0113636		378	CIRBP	19	1269264	1273171	6	0	0.0345023		378	ARHGEF18	19	7459998	7537371	6	3	0.0276776		378	PIK3R5	17	8782232	8815834	6	3	0.046141		378	MAMDC2	9	72658496	72791476
									379	ACAN	15	89346673	89418585	6	0	0.0113636		379	C19orf24	19	1275519	1279243	6	0	0.0345023		379	PNPLA6	19	7599037	7626653	6	3	0.0276776		379	CFAP52	17	9479943	9546776	6	3	0.046141		379	SMC5	9	72873877	72969789
									380	ABHD2	15	89631380	89745591	6	0	0.0113636		380	EFNA2	19	1286152	1301430	6	0	0.0345023		380	TIMM44	19	7991602	8008708	6	3	0.0276776		380	DHRS7C	17	9674750	9694614	6	3	0.046141		380	KLF9	9	72999512	73029573
									381	C15orf38-AP3S2	15	90373830	90456222	6	0	0.0113636		381	MUM1	19	1354975	1378430	6	0	0.0345023		381	CCL25	19	8117645	8127547	6	3	0.0276776		381	GSG1L2	17	9705702	9725388	6	3	0.046141		381	CEMIP2	9	74298281	74383800
									382	ZNF710	15	90544722	90625432	6	0	0.0113636		382	NDUFS7	19	1383882	1395588	6	0	0.0345023		382	HNRNPM	19	8509711	8554002	6	3	0.0276776		382	GLP2R	17	9728867	9795420	6	3	0.046141		382	C9orf85	9	74526422	74588373
									383	SV2B	15	91642817	91845795	6	0	0.0113636		383	GAMT	19	1397024	1401569	6	0	0.0345023		383	ADAMTS10	19	8645123	8657080	6	3	0.0276776		383	RCVRN	17	9801026	9808684	6	3	0.046141		383	GDA	9	74729510	74867140
									384	SLCO3A1	15	92396937	92709137	6	0	0.0113636		384	DAZAP1	19	1407567	1435686	6	0	0.0345023		384	GPR108	19	6729924	6737633	6	3	0.0276776		384	MYH8	17	10293641	10325267	6	3	0.046141		384	ZFAND5	9	74966340	74979508
									385	MCTP2	15	94841429	95027181	6	0	0.0113636		385	RPS15	19	1438362	1440496	6	0	0.0345023		385	TRIP10	19	6739692	6751537	6	3	0.0276776		385	MYH1	17	10395623	10421859	6	3	0.046141		385	CENPP	9	95087749	95377446
									386	IGF1R	15	99191767	99507759	6	0	0.0113636		386	APC2	19	1450147	1473243	6	0	0.0345023		386	SH2D3A	19	6752170	6767523	6	3	0.0276776		386	MYH2	17	10424464	10452940	6	3	0.046141		386	ECM2	9	95255828	95298374
									387	TTC23	15	99676527	99789824	6	0	0.0113636		387	C19orf25	19	1473199	1479228	6	0	0.0345023		387	ADGRE1	19	6887559	6940464	6	3	0.0276776		387	MYH3	17	10531842	10560626	6	3	0.046141		387	WNK2	9	95947211	96081655
									388	LRRC28	15	99791566	99930937	6	0	0.0113636		388	PCSK4	19	1481426	1490449	6	0	0.0345023		388	MBD3L5	19	7030593	7033022	6	3	0.0276776		388	SCO1	17	10583648	10600885	6	3	0.046141		388	PTPDC1	9	96793075	96872138
									389	MEF2A	15	100106132	100256693	6	0	0.0113636		389	REEP6	19	1491003	1497924	6	0	0.0345023		389	MBD3L4	19	7037754	7040184	6	3	0.0276776		389	ADPRM	17	10600926	10614875	6	3	0.046141		389	FBP1	9	97365414	97401923
									390	LYSMD4	15	100267605	100273590	6	0	0.0113636		390	ADAMTSL5	19	1505016	1513188	6	0	0.0345023		390	MBD3L2	19	7049350	7051746	6	3	0.0276776		390	PIRT	17	10725791	10741418	6	3	0.046141		390	FANCC	9	97861335	98079536
									391	CERS3	15	100940599	101084491	6	0	0.0113636		391	PLK5	19	1524072	1535455	6	0	0.0345023		391	MBD3L3	19	7056215	7058645	6	3	0.0276776		391	ZNF18	17	11880755	11900689	6	3	0.046141		391	ERCC6L2	9	98637899	98731122
									392	ASB7	15	101142754	101191906	6	0	0.0113636		392	MEX3D	19	1554667	1568057	6	0	0.0345023		392	PEX11G	19	7541755	7553924	6	3	0.0276776		392	ELAC2	17	12894928	12921381	6	3	0.046141		392	SLC35D2	9	99082987	99145992
									393	ALDH1A3	15	101419896	101456831	6	0	0.0113636		393	MBD3	19	1576669	1592760	6	0	0.0345023		393	TEX45	19	7562444	7573336	6	3	0.0276776		393	CDRT15	17	14139172	14140150	6	3	0.046141		393	HABP4	9	99212436	99253618
									394	LRRK1	15	101459419	101613095	6	0	0.0113636		394	UQCR11	19	1597153	1605483	6	0	0.0345023		394	ZNF358	19	7581003	7585911	6	3	0.0276776		394	HS3ST3B1	17	14204366	14252721	6	3	0.046141		394	CDC14B	9	99262394	99382112
									395	PCSK6	15	101844132	102030187	6	0	0.0113636		395	TCF3	19	1609288	1650286	6	0	0.0345023		395	MCOLN1	19	7587495	7598895	6	3	0.0276776		395	PMP22	17	15133093	15164161	6	3	0.046141		395	CCDC180	9	100069909	100141033
									396	SLC24A5	15	48413168	48434589	6	0	0.0113636		396	ONECUT3	19	1753661	1775444	6	0	0.0345023		396	CAMSAP3	19	7660787	7683196	6	3	0.0276776		396	TEKT3	17	15207128	15244958	6	3	0.046141		396	TMOD1	9	100263461	100364025
									397	MYEF2	15	48431624	48470558	6	0	0.0113636		397	ATP8B3	19	1782073	1812236	6	0	0.0345023		397	XAB2	19	7684410	7694439	6	3	0.0276776		397	CDRT4	17	15339331	15370925	6	3	0.046141		397	NCBP1	9	100395704	100436030
									398	CTXN2	15	48483866	48495951	6	0	0.0113636		398	KLF16	19	1852397	1863564	6	0	0.0345023		398	PET100	19	7694670	7696510	6	3	0.0276776		398	CDRT1	17	15468795	15523018	6	3	0.046141		398	GAPVD1	9	128024072	128127290
									399	SLC12A1	15	48498497	48596275	6	0	0.0113636		399	ABHD17A	19	1876974	1885518	6	0	0.0345023		399	PCP2	19	7696500	7697898	6	3	0.0276776		399	TRIM16	17	15531279	15586265	6	3	0.046141		399	STXBP1	9	130374485	130454995
									400	CEP152	15	49030134	49103343	6	0	0.0113636		400	ADAT3	19	1905212	1913446	6	0	0.0345023		400	STXBP2	19	7701986	7712760	6	3	0.0276776		400	ZNF286A	17	15602890	15624101	6	3	0.046141		400	SPTAN1	9	131314836	131395944
									401	EID1	15	49170289	49172380	6	0	0.0113636		401	SCAMP4	19	1905212	1926016	6	0	0.0345023		401	RETN	19	7733971	7735340	6	3	0.0276776		401	TBC1D26	17	15635590	15648098	6	3	0.046141		401	PKN3	9	131464782	131483199
									402	ISL2	15	76629064	76634816	6	0	0.0113636		402	BTBD2	19	1985446	2015702	6	0	0.0345023		402	MCEMP1	19	7741942	7744719	6	3	0.0276776		402	TNFRSF13B	17	16842397	16875402	6	3	0.046141		402	KYAT1	9	131595220	131644354
									403	RCN2	15	77223961	77242601	6	0	0.0113636		403	MKNK2	19	2037469	2051243	6	0	0.0345023		403	TRAPPC5	19	7745706	7747748	6	3	0.0276776		403	PLD6	17	17104308	17109646	6	3	0.046141		403	NUP188	9	131709971	131769375
									404	PSTPIP1	15	77287020	77329816	6	0	0.0113636		404	MOB3A	19	2071034	2096269	6	0	0.0345023		404	FCER2	19	7753642	7764365	6	3	0.0276776		404	FLCN	17	17115525	17140502	6	3	0.046141		404	CRAT	9	131857072	131873077
									405	TSPAN3	15	77336358	77363570	6	0	0.0113636		405	AP3D1	19	2100986	2151556	6	0	0.0345023		405	CLEC4G	19	7793842	7797057	6	3	0.0276776		405	NT5M	17	17206679	17250977	6	3	0.046141		405	NTMT1	9	132371162	132398410
									406	CHRNA5	15	78857861	78887611	6	0	0.0113636		406	PLEKHJ1	19	2229950	2236352	6	0	0.0345023		406	CD209	19	7804878	7812464	6	3	0.0276776		406	MED9	17	17380299	17396534	6	3	0.046141		406	C9orf50	9	132374503	132383055
									407	CHRNB4	15	78916635	78933587	6	0	0.0113636		407	SF3A2	19	2236815	2248678	6	0	0.0345023		407	CLEC4M	19	7828034	7834491	6	3	0.0276776		407	RASD1	17	17397750	17399709	6	3	0.046141		407	PTGES	9	132500614	132515344
									408	ADAMTS7	15	79051544	79103805	6	0	0.0113636		408	AMH	19	2249277	2252072	6	0	0.0345023		408	EVI5L	19	7895160	7929862	6	3	0.0276776		408	SREBF1	17	17714662	17740325	6	3	0.046141		408	FNBP1	9	132649465	132805473
									409	CTSH	15	79214091	79237440	6	0	0.0113636		409	JSRP1	19	2252249	2256422	6	0	0.0345023		409	PRR36	19	7933604	7939326	6	3	0.0276776		409	DRC3	17	17876126	17911142	6	3	0.046141		409	PRRC2B	9	134305476	134375578
									410	ANKRD34C	15	79575145	79590581	6	0	0.0113636		410	OAZ1	19	2269484	2273487	6	0	0.0345023		410	LRRC8E	19	7953389	7966908	6	3	0.0276776		410	ATPAF2	17	17921333	17942480	6	3	0.046141		410	RAPGEF1	9	134452156	134585229
									411	KIAA1024	15	79724857	79764642	6	0	0.0113636		411	PEAK3	19	2274630	2282181	6	0	0.0345023		411	MAP2K7	19	7968664	7979368	6	3	0.0276776		411	DRG2	17	17991180	18011299	6	3	0.046141		411	MED27	9	134735496	134955274
									412	MTHFS	15	80135888	80189391	6	0	0.0113636		412	LINGO3	19	2289773	2308156	6	0	0.0345023		412	TGFBR3L	19	7981031	7983980	6	3	0.0276776		412	MYO15A	17	18012019	18083116	6	3	0.046141		412	CFAP77	9	135285582	135448706
									413	ST20-MTHFS	15	80135888	80215448	6	0	0.0113636		413	LSM7	19	2321519	2328614	6	0	0.0345023		413	SNAPC2	19	7985193	7988136	6	3	0.0276776		413	LLGL1	17	18128935	18148189	6	3	0.046141		413	DDX31	9	135468383	135538713
									414	ST20	15	80191181	80207598	6	0	0.0113636		414	SPPL2B	19	2328628	2355100	6	0	0.0345023		414	CTXN1	19	7989380	7991051	6	3	0.0276776		414	FLII	17	18148128	18161870	6	3	0.046141		414	AK8	9	135600964	135754198
									415	BCL2A1	15	80253231	80263643	6	0	0.0113636		415	TMPRSS9	19	2389768	2426256	6	0	0.0345023		415	ELAVL1	19	8023456	8070529	6	3	0.0276776		415	MIEF2	17	18163847	18169095	6	3	0.046141		415	TSC1	9	135766734	135820020
									416	ZFAND6	15	80351909	80430735	6	0	0.0113636		416	TIMM13	19	2425621	2427914	6	0	0.0345023		416	FBN3	19	8130285	8213753	6	3	0.0276776		416	TOP3A	17	18174741	18218406	6	3	0.046141		416	TMEM252	9	71151495	71155783
									417	MESD	15	81268084	81282219	6	0	0.0113636		417	LMNB2	19	2428162	2456966	6	0	0.0345023		417	CERS4	19	8274216	8327305	6	3	0.0276776		417	SHMT1	17	18231173	18266877	6	3	0.046141		417	FAM122A	9	71394921	71398795
									418	TLNRD1	15	81293294	81296345	6	0	0.0113636		418	GADD45B	19	2476122	2478257	6	0	0.0345023		418	CD320	19	8367010	8373240	6	3	0.0276776		418	PRKN	6	161768589	163148834	3	0	0.0461538		418	PRKACG	9	71627444	71629039
									419	CFAP161	15	81426643	81441516	6	0	0.0113636		419	DIRAS1	19	2714564	2721390	6	0	0.0345023		419	NDUFA7	19	8376233	8386297	6	3	0.0276776		419	MYB	6	135502452	135540311	3	0	0.0461538		419	ABHD17B	9	74477367	74526161
									420	STARD5	15	81605006	81616524	6	0	0.0113636		420	SLC39A3	19	2732521	2740074	6	0	0.0345023		420	RPS28	19	8386383	8387280	6	3	0.0276776		420	AHI1	6	135605109	135818903	3	0	0.0461538		420	C9orf57	9	74666296	74675521
									421	MEX3B	15	82334118	82338484	6	0	0.0113636		421	SGTA	19	2754711	2783354	6	0	0.0345023		421	ANGPTL4	19	8429010	8439259	6	3	0.0276776		421	HBS1L	6	135281515	135376036	3	0	0.0461538		421	BICD2	9	95473644	95527083
									422	GOLGA6L9	15	82722184	82731587	6	0	0.0113636		422	THOP1	19	2785457	2813602	6	0	0.0345023		422	RAB11B	19	8455204	8469318	6	3	0.0276776		422	MCPH1	8	6264112	6304940	3	0	0.0461538		422	ZNF484	9	95607312	95640320
									423	RPS17	15	82821157	82824952	6	0	0.0113636		423	ZNF554	19	2819871	2836733	6	0	0.0345023		423	MARCH2	19	8478186	8503901	6	3	0.0276776		423	XKR5	8	6666037	6693166	3	0	0.0461538		423	FGD3	9	95709600	95798518
									424	GOLGA6L10	15	82929673	82939197	6	0	0.0113636		424	ZNF555	19	2841432	2860472	6	0	0.0345023		424	PRAM1	19	8554939	8567538	6	3	0.0276776		424	ANGPT2	8	6357171	6420784	3	0	0.0461538		424	SUSD3	9	95820969	95847420
									425	FSD2	15	83424116	83474822	6	0	0.0113636		425	ZNF556	19	2867332	2878515	6	0	0.0345023		425	ZNF414	19	8575461	8579048	6	3	0.0276776		425	AGPAT5	8	6565877	6619024	3	0	0.0461538		425	CARD19	9	95858404	95875577
									426	HOMER2	15	83517728	83621476	6	0	0.0113636		426	ZNF57	19	2900895	2918474	6	0	0.0345023		426	MYO1F	19	8585673	8642331	6	3	0.0276776		426	DEFB1	8	6728096	6735529	3	0	0.0461538		426	NINJ1	9	95883770	95896570
									427	RAMMET	15	83654954	83659809	6	0	0.0113636		427	ZNF77	19	2933215	2944969	6	0	0.0345023		427	ACTL9	19	8807746	8809180	6	3	0.0276776		427	ADCY7	16	50300450	50344440	3	0	0.0461538		427	C9orf129	9	96080480	96108696
									428	C15orf40	15	83657714	83680393	6	0	0.0113636		428	TLE6	19	2977535	2995182	6	0	0.0345023		428	OR2Z1	19	8841315	8842371	6	3	0.0276776		428	CASKIN1	16	2227183	2246465	3	0	0.0461538		428	FAM120AOS	9	96208781	96213886
									429	BTBD1	15	83685174	83736106	6	0	0.0113636		429	AES	19	3052907	3062371	6	0	0.0345023		429	ZNF558	19	8920251	8932739	6	3	0.0276776		429	C16orf78	16	49407718	49433342	3	0	0.0461538		429	FAM120A	9	96213977	96293688
									430	TM6SF1	15	83776237	83806111	6	0	0.0113636		430	GNA11	19	3094407	3124000	6	0	0.0345023		430	ZNF426	19	9633899	9649321	6	3	0.0276776		430	ZNF423	16	49521441	49698142	3	0	0.0461538		430	PHF2	9	96338908	96441869
									431	HDGFL3	15	83806803	83876770	6	0	0.0113636		431	S1PR4	19	3178735	3180330	6	0	0.0345023		431	ZNF121	19	9676403	9695209	6	3	0.0276776		431	CNEP1R1	16	50059116	50070999	3	0	0.0461538		431	BARX1	9	96713908	96717608
									432	BNC1	15	83924654	83952209	6	0	0.0113636		432	NCLN	19	3185874	3209573	6	0	0.0345023		432	ZNF561	19	9718001	9731916	6	3	0.0276776		432	PAPD5	16	50186828	50269221	3	0	0.0461538		432	ZNF169	9	97021547	97064111
									433	UBE2Q2L	15	84841241	84850985	6	0	0.0113636		433	SMIM24	19	3474404	3480540	6	0	0.0345023		433	ZNF562	19	9759329	9785776	6	3	0.0276776		433	PKD1	16	2138710	2185899	3	0	0.0461538		433	NUTM2F	9	97080477	97090926
									434	GOLGA6L4	15	84904524	84914120	6	0	0.0113636		434	DOHH	19	3490818	3500621	6	0	0.0345023		434	IL15	4	142557748	142655140	5	2	0.0282761		434	RAB26	16	2198144	2204166	3	0	0.0461538		434	MFSD14B	9	97136832	97223202
									435	ZSCAN2	15	85144248	85150116	6	0	0.0113636		435	FZR1	19	3506294	3536755	6	0	0.0345023		435	INPP4B	4	142944312	143767688	5	2	0.0282761		435	TRAF7	16	2205798	2228130	3	0	0.0461538		435	FBP2	9	97320995	97356114
									436	NMB	15	85198359	85201802	6	0	0.0113636		436	C19orf71	19	3539154	3544028	6	0	0.0345023		436	ZNF827	4	146678778	146860112	5	2	0.0282761		436	MLST8	16	2255177	2259418	3	0	0.0461538		436	PTCH1	9	98205263	98269481
									437	SEC11A	15	85212767	85259691	6	0	0.0113636		437	MFSD12	19	3544196	3557582	6	0	0.0345023		437	TTC29	4	147627789	147867038	5	2	0.0282761		437	BRICD5	16	2259253	2261069	3	0	0.0461538		437	HSD17B3	9	98997588	99064434
									438	ALPK3	15	85359910	85416713	6	0	0.0113636		438	HMG20B	19	3572942	3579081	6	0	0.0345023		438	GAB1	4	144257982	144395718	5	2	0.0282761		438	PGP	16	2261602	2264822	3	0	0.0461538		438	ZNF367	9	99148222	99180669
									439	GOLGA6L3	15	85783640	85790418	6	0	0.0113636		439	GIPC3	19	3585568	3593539	6	0	0.0345023		439	SMARCA5	4	144434615	144478642	5	2	0.0282761		439	HEATR3	16	50099851	50141183	3	0	0.0461538		439	AAED1	9	99403532	99417599
									440	KLHL25	15	86302556	86338189	6	0	0.0113636		440	TBXA2R	19	3594503	3606831	6	0	0.0345023		440	FREM3	4	144498559	144621828	5	2	0.0282761		440	BRD7	16	50352928	50402845	3	0	0.0461538		440	ZNF510	9	99516830	99540348
									441	MRPL46	15	89002708	89010633	6	0	0.0113636		441	CACTIN	19	3610625	3626813	6	0	0.0345023		441	HHIP	4	145567147	145659881	5	2	0.0282761		441	CTRB2	16	75237993	75241072	3	0	0.0461538		441	NUTM2G	9	99691285	99701700
									442	MRPS11	15	89010683	89015851	6	0	0.0113636		442	TJP3	19	3708334	3750811	6	0	0.0345023		442	ANAPC10	4	145915726	146018534	5	2	0.0282761		442	CTRB1	16	75252883	75258825	3	0	0.0461538		442	CTSV	9	99791958	99801592
									443	DET1	15	89055710	89089606	6	0	0.0113636		443	APBA3	19	3750770	3761673	6	0	0.0345023		443	SMAD1	4	146402950	146480328	5	2	0.0282761		443	BCAR1	16	75262927	75301951	3	0	0.0461538		443	TDRD7	9	100174301	100258407
									444	AEN	15	89164526	89175512	6	0	0.0113636		444	MRPL54	19	3762664	3767563	6	0	0.0345023		444	SLC10A7	4	147175138	147443123	5	2	0.0282761		444	MAPT	17	43971747	44105700	3	0	0.0461538		444	TSTD2	9	100362361	100395962
									445	ISG20	15	89178867	89199575	6	0	0.0113636		445	RAX2	19	3769086	3772219	6	0	0.0345023		445	LRBA	4	151185810	151936419	5	2	0.0282761		445	NFE2L1	17	46125666	46138907	3	0	0.0461538		445	XPA	9	100437190	100459691
									446	HAPLN3	15	89420515	89438857	6	0	0.0113636		446	ZFR2	19	3804021	3869027	6	0	0.0345023		446	USP38	4	144106069	144136718	5	2	0.0282761		446	MBTD1	17	49254785	49337427	3	0	0.0461538		446	RABEPK	9	127962820	127996438
									447	MFGE8	15	89441913	89455993	6	0	0.0113636		447	ATCAY	19	3880617	3928080	6	0	0.0345023		447	GYPE	4	144792018	144826716	5	2	0.0282761		447	ANKFN1	17	54230835	54560007	3	0	0.0461538		447	HSPA5	9	127997126	128003666
									448	RLBP1	15	89753097	89764922	6	0	0.0113636		448	NMRK2	19	3933100	3942414	6	0	0.0345023		448	GYPB	4	144917256	144940498	5	2	0.0282761		448	MSI2	17	55333211	55762050	3	0	0.0461538		448	ODF2	9	131217433	131257119
									449	FANCI	15	89787193	89860362	6	0	0.0113636		449	DAPK3	19	3958450	3971121	6	0	0.0345023		449	GYPA	4	145030455	145061939	5	2	0.0282761		449	DHX40	17	57642885	57685713	3	0	0.0461538		449	GLE1	9	131266970	131302156
									450	POLG	15	89859535	89878026	6	0	0.0113636		450	EEF2	19	3976053	3985461	6	0	0.0345023		450	ABCE1	4	146019155	146050676	5	2	0.0282761		450	BRIP1	17	59756546	59940920	3	0	0.0461538		450	WDR34	9	131395939	131419129
									451	RHCG	15	90014637	90039814	6	0	0.0113636		451	PIAS4	19	4007595	4039384	6	0	0.0345023		451	OTUD4	4	146054801	146100832	5	2	0.0282761		451	MARCH10	17	60778674	60884014	3	0	0.0461538		451	SET	9	131445933	131458675
									452	TICRR	15	90118817	90171254	6	0	0.0113636		452	MAP2K2	19	4090318	4124126	6	0	0.0345023		452	MMAA	4	146540539	146581187	5	2	0.0282761		452	MAP3K14	17	43340485	43394430	3	0	0.0461538		452	ZDHHC12	9	131483147	131486408
									453	PLIN1	15	90207597	90222648	6	0	0.0113636		453	CETN3	5	89689151	89705603	5	0	0.0441176		453	C4orf51	4	146601355	146653949	5	2	0.0282761		453	PLEKHM1	17	43513265	43568146	3	0	0.0461538		453	ZER1	9	131492064	131534213
									454	PEX11A	15	90224761	90234015	6	0	0.0113636		454	FOCAD	9	20658307	20995954	5	0	0.0441176		454	LSM6	4	147096834	147111213	5	2	0.0282761		454	LINC02210-CRHR1	17	43697694	43913194	3	0	0.0461538		454	TBC1D13	9	131549485	131572711
									455	WDR93	15	90234027	90247709	6	0	0.0113636		455	PTAR1	9	72324437	72374876	5	0	0.0441176		455	POU4F2	4	147560044	147563623	5	2	0.0282761		455	CRHR1	17	43861645	43913194	3	0	0.0461538		455	ENDOG	9	131580778	131584955
									456	MESP1	15	90293097	90294540	6	0	0.0113636		456	TRPM3	9	73149948	73483974	5	0	0.0441176		456	EDNRA	4	148402068	148466106	5	2	0.0282761		456	KANSL1	17	44107281	44270166	3	0	0.0461538		456	SPOUT1	9	131581929	131592100
									457	MESP2	15	90319588	90321985	6	0	0.0113636		457	COL15A1	9	101705994	101833074	5	0	0.0441176		457	TMEM184C	4	148538538	148556674	5	2	0.0282761		457	ARL17B	17	44376912	44439134	3	0	0.0461538		457	LRRC8A	9	131644390	131680318
									458	ANPEP	15	90328125	90358072	6	0	0.0113636		458	ERP44	9	102741460	102861334	5	0	0.0441176		458	PRMT9	4	148558935	148605381	5	2	0.0282761		458	NSF	17	44668034	44834830	3	0	0.0461538		458	PHYHD1	9	131683173	131704320
									459	AP3S2	15	90373830	90437617	6	0	0.0113636		459	PLPPR1	9	103791030	104087417	5	0	0.0441176		459	MAB21L2	4	151503076	151505845	5	2	0.0282761		459	WNT9B	17	44928951	44957926	3	0	0.0461538		459	DOLK	9	131707808	131710012
									460	ARPIN	15	90439763	90455919	6	0	0.0113636		460	PTPN3	9	112137973	112213664	5	0	0.0441176		460	C15orf39	15	75494220	75504510	5	2	0.0282761		460	CDC27	17	45195062	45266678	3	0	0.0461538		460	SH3GLB2	9	131770070	131790632
									461	IDH2	15	90627209	90643853	6	0	0.0113636		461	SVEP1	9	113127527	113342160	5	0	0.0441176		461	MYO9A	15	72118350	72410440	5	2	0.0282761		461	ITGB3	17	45331207	45390077	3	0	0.0461538		461	MIGA2	9	131798789	131834361
									462	VPS33B	15	91541645	91565851	6	0	0.0113636		462	ZNF483	9	114287438	114306712	5	0	0.0441176		462	NEO1	15	73344824	73597547	5	2	0.0282761		462	EFCAB13	17	45401326	45508076	3	0	0.0461538		462	DOLPP1	9	131843382	131852717
									463	NR2F2	15	96869156	96883492	6	0	0.0113636		463	KIAA1958	9	115249247	115427591	5	0	0.0441176		463	C15orf65	15	55700722	55710910	5	2	0.0282761		463	NPEPPS	17	45600322	45700642	3	0	0.0461538		463	PTPA	9	131873227	131911225
									464	SPATA8	15	97326636	97328845	6	0	0.0113636		464	TRUB2	9	131071378	131084497	5	0	0.0441176		464	PYGO1	15	55831078	55880176	5	2	0.0282761		464	KPNB1	17	45727203	45761004	3	0	0.0461538		464	IER5L	9	131937830	131940540
									465	ARRDC4	15	98503932	98517068	6	0	0.0113636		465	HMCN2	9	133028157	133309510	5	0	0.0441176		465	RFX7	15	56382730	56535483	5	2	0.0282761		465	SP2	17	45973515	46006323	3	0	0.0461538		465	ASB6	9	132396882	132404448
									466	FAM169B	15	98980390	99057611	6	0	0.0113636		466	ADAMTS13	9	136287119	136324525	5	0	0.0441176		466	GRAMD2A	15	72452146	72490136	5	2	0.0282761		466	SKAP1	17	46210801	46507594	3	0	0.0461538		466	PRRX2	9	132427919	132484953
									467	PGPEP1L	15	99511458	99548885	6	0	0.0113636		467	ARRDC1	9	140500091	140509812	5	0	0.0441176		467	ARIH1	15	72766666	72878896	5	2	0.0282761		467	CALCOCO2	17	46908349	46942607	3	0	0.0461538		467	TOR1B	9	132565421	132573568
									468	SYNM	15	99645285	99675800	6	0	0.0113636		468	MLLT3	9	20341662	20621986	5	0	0.0441176		468	BBS4	15	72978519	73030817	5	2	0.0282761		468	NGFR	17	47572654	47592382	3	0	0.0461538		468	TOR1A	9	132575220	132586441
									469	LINS1	15	101109427	101142445	6	0	0.0113636		469	ZCCHC7	9	37120468	37358146	5	0	0.0441176		469	REC114	15	73735498	73852354	5	2	0.0282761		469	SPOP	17	47676245	47755525	3	0	0.0461538		469	C9orf78	9	132589563	132597572
									470	CHSY1	15	101715927	101792137	6	0	0.0113636		470	POLR1E	9	37485931	37503694	5	0	0.0441176		470	NPTN	15	73852343	73925753	5	2	0.0282761		470	FAM117A	17	47787686	47841518	3	0	0.0461538		470	USP20	9	132597695	132644117
									471	SELENOS	15	101811113	101817725	6	0	0.0113636		471	SHB	9	37915894	38069210	5	0	0.0441176		471	PML	15	74287013	74328735	5	2	0.0282761		471	SPATA20	17	48624449	48633213	3	0	0.0461538		471	FAM78A	9	134133464	134151906
									472	SNRPA1	15	101821714	101835487	6	0	0.0113636		472	PGM5	9	70971814	71145977	5	0	0.0441176		472	CCDC33	15	74528629	74628482	5	2	0.0282761		472	ABCC3	17	48712217	48769063	3	0	0.0461538		472	PLPP7	9	134165080	134184649
									473	DOK6	18	67068283	67516323	6	0	0.0113636		473	PIP5K1B	9	71320329	71624092	5	0	0.0441176		473	SEMA7A	15	74701624	74726045	5	2	0.0282761		473	SPAG9	17	49039534	49198226	3	0	0.0461538		473	POMT1	9	134378288	134399193
									474	BCL2	18	60790578	60986613	6	0	0.0113636		474	FXN	9	71650478	71715094	5	0	0.0441176		474	ARID3B	15	74833517	74890472	5	2	0.0282761		474	CA10	17	49707673	50236132	3	0	0.0461538		474	UCK1	9	134399182	134406662
									475	ZNF407	18	72342918	72516583	6	0	0.0113636		475	TJP2	9	71736179	71870124	5	0	0.0441176		475	EDC3	15	74922898	74988386	5	2	0.0282761		475	STXBP4	17	53046125	53241449	3	0	0.0461538		475	NTNG2	9	135037333	135118220
									476	VPS4B	18	61056422	61089752	6	0	0.0113636		476	FAM189A2	9	71939487	72007389	5	0	0.0441176		476	COMMD4	15	75628336	75632618	5	2	0.0282761		476	DGKE	17	54911459	54946036	3	0	0.0461538		476	SETX	9	135136826	135230372
									477	CDH7	18	63417487	63549202	6	0	0.0113636		477	APBA1	9	72042448	72287275	5	0	0.0441176		477	PTPN9	15	75759461	75871632	5	2	0.0282761		477	AKAP1	17	55162552	55198710	3	0	0.0461538		477	BARHL1	9	135457992	135465640
									478	CDH19	18	64168423	64271375	6	0	0.0113636		478	C9orf135	9	72435720	72521151	5	0	0.0441176		478	SNUPN	15	75890423	75918446	5	2	0.0282761		478	CUEDC1	17	55938603	55980750	3	0	0.0461538		478	GTF3C4	9	135545421	135570342
									479	CCDC102B	18	66382490	66722426	6	0	0.0113636		479	MAMDC2	9	72658496	72791476	5	0	0.0441176		479	UBE2Q2	15	76135626	76193388	5	2	0.0282761		479	RNF43	17	56429860	56494943	3	0	0.0461538		479	SPACA9	9	135753706	135765419
									480	RTTN	18	67671039	67872962	6	0	0.0113636		480	SMC5	9	72873877	72969789	5	0	0.0441176		480	NRG4	15	76234313	76304785	5	2	0.0282761		480	TEX14	17	56634037	56769416	3	0	0.0461538		480	GFI1B	9	135820931	135867084
									481	NETO1	18	70409548	70534810	6	0	0.0113636		481	KLF9	9	72999512	73029573	5	0	0.0441176		481	HMG20A	15	77712992	77777945	5	2	0.0282761		481	PPM1E	17	56833229	57062540	3	0	0.0461538		481	PIBF1	13	73356229	73590592
									482	CYB5A	18	71920526	71959251	6	0	0.0113636		482	CEMIP2	9	74298281	74383800	5	0	0.0441176		482	LINGO1	15	77905365	77988490	5	2	0.0282761		482	TRIM37	17	57059998	57184282	3	0	0.0461538		482	KLF12	13	74260148	74708066
									483	CNDP1	18	72201691	72252261	6	0	0.0113636		483	C9orf85	9	74526422	74588373	5	0	0.0441176		483	ACSBG1	15	78463186	78527049	5	2	0.0282761		483	PRR11	17	57232859	57284070	3	0	0.0461538		483	FBXL3	13	77579388	77601331
									484	SMIM21	18	73121430	73139658	6	0	0.0113636		484	GDA	9	74729510	74867140	5	0	0.0441176		484	IREB2	15	78730517	78793798	5	2	0.0282761		484	YPEL2	17	57409052	57479095	3	0	0.0461538		484	GPC6	13	93879060	95060274
									485	ZNF516	18	74069636	74207146	6	0	0.0113636		485	ZFAND5	9	74966340	74979508	5	0	0.0441176		485	IQGAP1	15	90931472	91045475	5	2	0.0282761		485	VMP1	17	57784825	57919616	3	0	0.0461538		485	UGGT2	13	96453833	96705736
									486	ZNF236	18	74534562	74682683	6	0	0.0113636		486	NTRK2	9	87283372	87430623	5	0	0.0441176		486	CRTC3	15	91073117	91188577	5	2	0.0282761		486	USP32	17	58254690	58469586	3	0	0.0461538		486	NALCN	13	101706129	102068813
									487	MBP	18	74690788	74729055	6	0	0.0113636		487	AGTPBP1	9	88161453	88356944	5	0	0.0441176		487	BLM	15	91260557	91358692	5	2	0.0282761		487	MED13	17	60019965	60142643	3	0	0.0461538		487	FAM155A	13	107820878	108519460
									488	GALR1	18	74962007	74982098	6	0	0.0113636		488	NAA35	9	88556056	88637213	5	0	0.0441176		488	UNC45A	15	91473409	91497323	5	2	0.0282761		488	TLK2	17	60556128	60692842	3	0	0.0461538		488	FNDC3A	13	49550047	49783915
									489	ATP9B	18	76829274	77138283	6	0	0.0113636		489	C9orf153	9	88835179	88870948	5	0	0.0441176		489	FAM174B	15	93160677	93199031	5	2	0.0282761		489	FMNL1	17	43299291	43324685	3	0	0.0461538		489	TBC1D4	13	75858799	76056304
									490	NFATC1	18	77155771	77228002	6	0	0.0113636		490	S1PR3	9	91606323	91620070	5	0	0.0441176		490	CHD2	15	93443550	93492464	5	2	0.0282761		490	SPATA32	17	43331759	43339479	3	0	0.0461538		490	UCHL3	13	76123615	76180156
									491	CTDP1	18	77439800	77514510	6	0	0.0113636		491	SHC3	9	91620685	91793682	5	0	0.0441176		491	TARSL2	15	102193954	102264645	5	2	0.0282761		491	ARHGAP27	17	43471267	43503012	3	0	0.0461538		491	LMO7	13	76194569	76434006
									492	HSBP1L1	18	77724581	77730822	6	0	0.0113636		492	SEMA4D	9	91975705	92094611	5	0	0.0441176		492	CCPG1	15	55647420	55700574	5	2	0.0282761		492	SPPL2C	17	43922255	43924438	3	0	0.0461538		492	MYCBP2	13	77618791	77901177
									493	PARD6G	18	77915114	78005397	6	0	0.0113636		493	SYK	9	93563961	93660842	5	0	0.0441176		493	DNAAF4	15	55709952	55800432	5	2	0.0282761		493	STH	17	44076615	44077060	3	0	0.0461538		493	SCEL	13	78109808	78219398
									494	KDSR	18	60994970	61034506	6	0	0.0113636		494	AUH	9	93976096	94124206	5	0	0.0441176		494	NR2E3	15	72102887	72107270	5	2	0.0282761		494	LRRC37A	17	44372496	44415160	3	0	0.0461538		494	EDNRB	13	78469615	78549858
									495	SERPINB5	18	61144143	61172318	6	0	0.0113636		495	ROR2	9	94484877	94712444	5	0	0.0441176		495	SENP8	15	72406598	72433311	5	2	0.0282761		495	ARL17A	17	44586044	44657088	3	0	0.0461538		495	RBM26	13	79893002	79980356
									496	SERPINB12	18	61223392	61236560	6	0	0.0113636		496	IARS	9	94972488	95056038	5	0	0.0441176		496	PKM	15	72491369	72522063	5	2	0.0282761		496	LRRC37A2	17	44590075	44633014	3	0	0.0461538		496	NDFIP2	13	80055258	80130212
									497	SERPINB13	18	61254533	61266433	6	0	0.0113636		497	OGN	9	95145552	95166981	5	0	0.0441176		497	PARP6	15	72533521	72564916	5	2	0.0282761		497	WNT3	17	44839871	44896126	3	0	0.0461538		497	DCT	13	95089557	95201667
									498	SERPINB4	18	61304492	61311553	6	0	0.0113636		498	CORO2A	9	100883256	100935174	5	0	0.0441176		498	CELF6	15	72577067	72598656	5	2	0.0282761		498	GOSR2	17	45000482	45014205	3	0	0.0461538		498	ABCC4	13	95672082	95953700
									499	SERPINB3	18	61322430	61329197	6	0	0.0113636		499	GABBR2	9	101050363	101471479	5	0	0.0441176		499	HEXA	15	72635775	72668814	5	2	0.0282761		499	RPRML	17	45055521	45056614	3	0	0.0461538		499	HS6ST3	13	96743092	97491816
									500	SERPINB11	18	61369537	61391127	6	0	0.0113636		500	GALNT12	9	101569980	101612363	5	0	0.0441176		500	TMEM202	15	72690667	72700708	5	2	0.0282761		500	MYL4	17	45286427	45301045	3	0	0.0461538		500	FARP1	13	98794815	99102027
									501	SERPINB7	18	61420280	61472610	6	0	0.0113636		501	INVS	9	102861466	103064457	5	0	0.0441176		501	GOLGA6B	15	72947037	72959738	5	2	0.0282761		501	TBKBP1	17	45772629	45789429	3	0	0.0461538		501	RNF113B	13	98828038	98829521
									502	SERPINB2	18	61554938	61571124	6	0	0.0113636		502	MSANTD3-TMEFF1	9	103204187	103339918	5	0	0.0441176		502	ADPGK	15	73043707	73076126	5	2	0.0282761		502	TBX21	17	45810609	45823485	3	0	0.0461538		502	STK24	13	99102452	99229405
									503	SERPINB10	18	61575223	61603345	6	0	0.0113636		503	TMEFF1	9	103235519	103339918	5	0	0.0441176		503	HCN4	15	73612199	73661605	5	2	0.0282761		503	OSBPL7	17	45884732	45899147	3	0	0.0461538		503	SLC15A1	13	99336054	99404929
									504	HMSD	18	61616587	61627646	6	0	0.0113636		504	GRIN3A	9	104331633	104500862	5	0	0.0441176		504	CD276	15	73976621	74006859	5	2	0.0282761		504	MRPL10	17	45900637	45908907	3	0	0.0461538		504	CLYBL	13	100258917	100545018
									505	SERPINB8	18	61637262	61653887	6	0	0.0113636		505	CYLC2	9	105757592	105780770	5	0	0.0441176		505	C15orf59	15	74027771	74043816	5	2	0.0282761		505	LRRC46	17	45908992	45915079	3	0	0.0461538		505	PCCA	13	100741268	101182691
									506	DSEL	18	65173818	65183967	6	0	0.0113636		506	ABCA1	9	107543282	107690527	5	0	0.0441176		506	TBC1D21	15	74165926	74181555	5	2	0.0282761		506	SCRN2	17	45915046	45918699	3	0	0.0461538		506	GGACT	13	101182417	101241046
									507	TMX3	18	66340924	66382353	6	0	0.0113636		507	SLC44A1	9	108006885	108200796	5	0	0.0441176		507	LOXL1	15	74218798	74244482	5	2	0.0282761		507	SP6	17	45922279	45928516	3	0	0.0461538		507	TMTC4	13	101256089	101327189
									508	CD226	18	67530191	67615089	6	0	0.0113636		508	FSD1L	9	108210314	108314714	5	0	0.0441176		508	STOML1	15	74275558	74284689	5	2	0.0282761		508	PNPO	17	46018888	46026674	3	0	0.0461538		508	ITGBL1	13	102104943	102368796
									509	SOCS6	18	67956136	67997434	6	0	0.0113636		509	FKTN	9	108320410	108403399	5	0	0.0441176		509	GOLGA6A	15	74362197	74374891	5	2	0.0282761		509	PRR15L	17	46029332	46035243	3	0	0.0461538		509	TPP2	13	103249285	103332308
									510	GTSCR1	18	68297754	68318093	6	0	0.0113636		510	TMEM38B	9	108456805	108538892	5	0	0.0441176		510	ISLR2	15	74421714	74429143	5	2	0.0282761		510	CDK5RAP3	17	46047893	46059152	3	0	0.0461538		510	ARGLU1	13	107195661	107220514
									511	CBLN2	18	70203914	70211723	6	0	0.0113636		511	ZNF462	9	109625377	109775915	5	0	0.0441176		511	ISLR	15	74466086	74469212	5	2	0.0282761		511	COPZ2	17	46103532	46115168	3	0	0.0461538		511	MYO16	13	109248499	109860355
									512	FBXO15	18	71740587	71814999	6	0	0.0113636		512	ELP1	9	111629796	111696612	5	0	0.0441176		512	STRA6	15	74471806	74495220	5	2	0.0282761		512	CBX1	17	46147413	46178560	3	0	0.0461538		512	SUCLA2	13	48516790	48575462
									513	TIMM21	18	71815745	71826204	6	0	0.0113636		513	TMEM245	9	111777414	111882225	5	0	0.0441176		513	CYP11A1	15	74630102	74658553	5	2	0.0282761		513	SNX11	17	46184894	46200963	3	0	0.0461538		513	NUDT15	13	48611702	48615638
									514	C18orf63	18	71983109	72026422	6	0	0.0113636		514	EPB41L4B	9	111934253	112083244	5	0	0.0441176		514	UBL7	15	74738317	74753529	5	2	0.0282761		514	HOXB1	17	46606806	46608272	3	0	0.0461538		514	MED4	13	48649863	48669277
									515	FAM69C	18	72102962	72124503	6	0	0.0113636		515	PALM2	9	112403067	112713756	5	0	0.0441176		515	CLK3	15	74900712	74922542	5	2	0.0282761		515	HOXB2	17	46620016	46622393	3	0	0.0461538		515	LPAR6	13	48985180	48987653
									516	CNDP2	18	72163499	72190689	6	0	0.0113636		516	PALM2-AKAP2	9	112542576	112934792	5	0	0.0441176		516	CYP1A1	15	75011882	75017951	5	2	0.0282761		516	HOXB3	17	46626231	46651810	3	0	0.0461538		516	MLNR	13	49794473	49796513
									517	ZADH2	18	72907062	72917468	6	0	0.0113636		517	AKAP2	9	112810877	112934792	5	0	0.0441176		517	CYP1A2	15	75041183	75048941	5	2	0.0282761		517	HOXB4	17	46652868	46655743	3	0	0.0461538		517	MZT1	13	73282494	73301938
									518	TSHZ1	18	72922709	73001905	6	0	0.0113636		518	MUSK	9	113431050	113563278	5	0	0.0441176		518	CSK	15	75074424	75095539	5	2	0.0282761		518	HOXB5	17	46668618	46671103	3	0	0.0461538		518	BORA	13	73301886	73330336
									519	C18orf65	18	74207476	74210045	6	0	0.0113636		519	LPAR1	9	113636053	113800365	5	0	0.0441176		519	LMAN1L	15	75105193	75118099	5	2	0.0282761		519	HOXB6	17	46673098	46682334	3	0	0.0461538		519	DIS3	13	73329539	73356266
									520	SALL3	18	76740274	76758969	6	0	0.0113636		520	ECPAS	9	114122972	114247025	5	0	0.0441176		520	CPLX3	15	75118950	75124136	5	2	0.0282761		520	HOXB7	17	46684593	46688383	3	0	0.0461538		520	KLF5	13	73629113	73651680
									521	KCNG2	18	77623667	77659816	6	0	0.0113636		521	DNAJC25-GNG10	9	114393631	114432526	5	0	0.0441176		521	ULK3	15	75128456	75135552	5	2	0.0282761		521	HOXB8	17	46689707	46692301	3	0	0.0461538		521	COMMD6	13	76099349	76112008
									522	PQLC1	18	77662419	77711653	6	0	0.0113636		522	GNG10	9	114423850	114432526	5	0	0.0441176		522	SCAMP2	15	75136070	75165720	5	2	0.0282761		522	HOXB9	17	46698517	46703835	3	0	0.0461538		522	LMO7DN	13	76445173	76457948
									523	TXNL4A	18	77732866	77748592	6	0	0.0113636		523	UGCG	9	114659045	114697654	5	0	0.0441176		523	MPI	15	75182345	75191798	5	2	0.0282761		523	PRAC1	17	46799080	46799882	3	0	0.0461538		523	KCTD12	13	77454303	77460540
									524	RBFA	18	77794345	77810652	6	0	0.0113636		524	SUSD1	9	114803060	114937577	5	0	0.0441176		524	FAM219B	15	75192327	75199235	5	2	0.0282761		524	PRAC2	17	46800529	46802120	3	0	0.0461538		524	ACOD1	13	77522693	77532777
									525	ADNP2	18	77866914	77898229	6	0	0.0113636		525	PTBP3	9	114979994	115095306	5	0	0.0441176		525	COX5A	15	75212615	75230495	5	2	0.0282761		525	HOXB13	17	46802124	46806111	3	0	0.0461538		525	CLN5	13	77566058	77576652
									526	KANK3	19	8387467	8408146	6	0	0.0113636		526	HSDL2	9	115142188	115234685	5	0	0.0441176		526	RPP25	15	75247442	75249775	5	2	0.0282761		526	TTLL6	17	46839592	46871686	3	0	0.0461538		526	LOC100129307	13	78235508	78236938
									527	IZUMO4	19	2096867	2099583	6	0	0.0113636		527	INIP	9	115446227	115480429	5	0	0.0441176		527	SCAMP5	15	75287875	75313836	5	2	0.0282761		527	ATP5MC1	17	46970147	46973233	3	0	0.0461538		527	SLAIN1	13	78271988	78338377
									528	PTPRS	19	5205518	5340814	6	0	0.0113636		528	SNX30	9	115513133	115637267	5	0	0.0441176		528	PPCDC	15	75315895	75343067	5	2	0.0282761		528	UBE2Z	17	46985730	47006422	3	0	0.0461538		528	POU4F1	13	79173226	79177695
									529	ZNF559	19	9434447	9454521	6	0	0.0113636		529	SLC31A1	9	115983807	116026772	5	0	0.0441176		529	LOC105376731	15	75519093	75522031	5	2	0.0282761		529	SNF8	17	47007457	47022204	3	0	0.0461538		529	RNF219	13	79188420	79233314
									530	ZNF559-ZNF177	19	9434901	9493293	6	0	0.0113636		530	BSPRY	9	116111811	116133513	5	0	0.0441176		530	GOLGA6C	15	75550898	75565796	5	2	0.0282761		530	GIP	17	47035917	47045955	3	0	0.0461538		530	SPRY2	13	80910110	80913794
									531	REXO1	19	1815244	1848452	6	0	0.0113636		531	RGS3	9	116207008	116360023	5	0	0.0441176		531	GOLGA6D	15	75575181	75588148	5	2	0.0282761		531	IGF2BP1	17	47074773	47133507	3	0	0.0461538		531	SLITRK1	13	84451339	84456528
									532	CSNK1G2	19	1941160	1981337	6	0	0.0113636		532	NR6A1	9	127279553	127533589	5	0	0.0441176		532	NEIL1	15	75639330	75647592	5	2	0.0282761		532	B4GALNT2	17	47209821	47247351	3	0	0.0461538		532	SLITRK6	13	86366921	86373483
									533	DOT1L	19	2164147	2232577	6	0	0.0113636		533	GOLGA1	9	127640572	127703386	5	0	0.0441176		533	MAN2C1	15	75648132	75660968	5	2	0.0282761		533	GNGT2	17	47283595	47286743	3	0	0.0461538		533	SLITRK5	13	88324869	88331871
									534	GNG7	19	2511217	2702746	6	0	0.0113636		534	SCAI	9	127704886	127905838	5	0	0.0441176		534	SIN3A	15	75661719	75743926	5	2	0.0282761		534	ABI3	17	47287588	47300587	3	0	0.0461538		534	TGDS	13	95226307	95248529
									535	DPP9	19	4675242	4723855	6	0	0.0113636		535	MAPKAP1	9	128199672	128469513	5	0	0.0441176		535	IMP3	15	75931425	75932664	5	2	0.0282761		535	PHOSPHO1	17	47300731	47308128	3	0	0.0461538		535	GPR180	13	95254103	95286899
									536	PLIN3	19	4838345	4867780	6	0	0.0113636		536	PBX3	9	128509616	128729656	5	0	0.0441176		536	SNX33	15	75941347	75950968	5	2	0.0282761		536	ZNF652	17	47366567	47439476	3	0	0.0461538		536	SOX21	13	95361875	95364797
									537	KDM4B	19	4969123	5153609	6	0	0.0113636		537	MVB12B	9	129089122	129159912	5	0	0.0441176		537	CSPG4	15	75966662	76005189	5	2	0.0282761		537	PHB	17	47481409	47492220	3	0	0.0461538		537	RAP2A	13	98086474	98120252
									538	SAFB	19	5623045	5668489	6	0	0.0113636		538	ZBTB34	9	129622943	129648157	5	0	0.0441176		538	ODF3L1	15	76016318	76020027	5	2	0.0282761		538	NXPH3	17	47653297	47661172	3	0	0.0461538		538	IPO5	13	98605928	98676550
									539	CATSPERD	19	5720687	5778742	6	0	0.0113636		539	RALGPS1	9	129677052	129940810	5	0	0.0441176		539	FBXO22	15	76196199	76223208	5	2	0.0282761		539	SLC35B1	17	47778295	47785313	3	0	0.0461538		539	ZIC5	13	100615274	100624178
									540	NDUFA11	19	5891286	5904024	6	0	0.0113636		540	GARNL3	9	130025940	130155828	5	0	0.0441176		540	TBC1D2B	15	78287326	78369994	5	2	0.0282761		540	KAT7	17	47865980	47906458	3	0	0.0461538		540	ZIC2	13	100634025	100639019
									541	RFX2	19	5993174	6110664	6	0	0.0113636		541	FAM129B	9	130267616	130331396	5	0	0.0441176		541	SH2D7	15	78384926	78396393	5	2	0.0282761		541	TAC4	17	47915670	47925379	3	0	0.0461538		541	METTL21C	13	103338096	103346871
									542	ACSBG2	19	6135643	6193114	6	0	0.0113636		542	ST6GALNAC4	9	130670164	130679305	5	0	0.0441176		542	CIB2	15	78396947	78423877	5	2	0.0282761		542	FLJ45513	17	47923271	47926199	3	0	0.0461538		542	CCDC168	13	103381716	103411422
									543	KHSRP	19	6413114	6424822	6	0	0.0113636		543	CIZ1	9	130928343	130953868	5	0	0.0441176		543	IDH3A	15	78441718	78462884	5	2	0.0282761		543	DLX4	17	48046561	48052323	3	0	0.0461538		543	TEX30	13	103418237	103426171
									544	C3	19	6677845	6720693	6	0	0.0113636		544	ABL1	9	133589267	133763062	5	0	0.0441176		544	DNAJA4	15	78556486	78574538	5	2	0.0282761		544	DLX3	17	48067368	48072588	3	0	0.0461538		544	KDELC1	13	103436630	103451404
									545	VAV1	19	6772678	6857377	6	0	0.0113636		545	LAMC3	9	133884503	133968446	5	0	0.0441176		545	WDR61	15	78575576	78592068	5	2	0.0282761		545	ITGA3	17	48133331	48167849	3	0	0.0461538		545	BIVM	13	103451398	103493888
									546	ZNF557	19	7069470	7087979	6	0	0.0113636		546	NUP214	9	134000947	134110057	5	0	0.0441176		546	CRABP1	15	78632665	78640572	5	2	0.0282761		546	PDK2	17	48172100	48188733	3	0	0.0461538		546	BIVM-ERCC5	13	103459495	103528351
									547	INSR	19	7112265	7294313	6	0	0.0113636		547	GTF3C5	9	135906061	135933890	5	0	0.0441176		547	HYKK	15	78799905	78828987	5	2	0.0282761		547	SAMD14	17	48188672	48207246	3	0	0.0461538		547	ERCC5	13	103498190	103528351
									548	ARHGEF18	19	7459998	7537371	6	0	0.0113636		548	SARDH	9	136528681	136603479	5	0	0.0441176		548	PSMA4	15	78832746	78841604	5	2	0.0282761		548	PPP1R9B	17	48211098	48227878	3	0	0.0461538		548	SLC10A2	13	103696347	103719196
									549	PNPLA6	19	7599037	7626653	6	0	0.0113636		549	VAV2	9	136627015	136857446	5	0	0.0441176		549	SEMA4B	15	90728151	90772892	5	2	0.0282761		549	SGCA	17	48243345	48253293	3	0	0.0461538		549	DAOA	13	106118215	106143383
									550	TIMM44	19	7991602	8008708	6	0	0.0113636		550	RXRA	9	137218308	137332432	5	0	0.0441176		550	CIB1	15	90773476	90777279	5	2	0.0282761		550	COL1A1	17	48261456	48279000	3	0	0.0461538		550	EFNB2	13	107142078	107187388
									551	CCL25	19	8117645	8127547	6	0	0.0113636		551	COL5A1	9	137533650	137736689	5	0	0.0441176		551	GDPGP1	15	90777486	90785312	5	2	0.0282761		551	TMEM92	17	48348766	48358846	3	0	0.0461538		551	LIG4	13	108859789	108867130
									552	HNRNPM	19	8509711	8554002	6	0	0.0113636		552	KCNT1	9	138594030	138684993	5	0	0.0441176		552	NGRN	15	90808894	90815443	5	2	0.0282761		552	XYLT2	17	48423392	48438546	3	0	0.0461538		552	ABHD13	13	108870762	108886603
									553	ADAMTS10	19	8645123	8657080	6	0	0.0113636		553	NACC2	9	138898382	138987131	5	0	0.0441176		553	ZNF774	15	90895476	90904715	5	2	0.0282761		553	MRPL27	17	48445227	48450562	3	0	0.0461538		553	TNFSF13B	13	108921976	108960832
									554	CBARP	19	1229946	1237990	6	0	0.0113636		554	INPP5E	9	139323066	139334274	5	0	0.0441176		554	FURIN	15	91411821	91426688	5	2	0.0282761		554	EME1	17	48450580	48458820	3	0	0.0461538		554	SEMA6D	15	47476402	48066420
									555	ATP5F1D	19	1241748	1244824	6	0	0.0113636		555	RABL6	9	139702373	139728928	5	0	0.0441176		555	FES	15	91427664	91439006	5	2	0.0282761		555	LRRC59	17	48458593	48474914	3	0	0.0461538		555	LIPC	15	58724174	58861073
									556	MIDN	19	1248551	1259142	6	0	0.0113636		556	MAN1B1	9	139981378	140003639	5	0	0.0441176		556	MAN2A2	15	91445447	91465815	5	2	0.0282761		556	ACSF2	17	48503518	48552206	3	0	0.0461538		556	ADAM10	15	58887402	59042177
									557	CIRBP	19	1269264	1273171	6	0	0.0113636		557	EXD3	9	140201345	140317714	5	0	0.0441176		557	HDDC3	15	91474147	91475799	5	2	0.0282761		557	CHAD	17	48541852	48546227	3	0	0.0461538		557	MINDY2	15	59063390	59154099
									558	C19orf24	19	1275519	1279243	6	0	0.0113636		558	PNPLA7	9	140354403	140445021	5	0	0.0441176		558	RCCD1	15	91498105	91506355	5	2	0.0282761		558	RSAD1	17	48556160	48563341	3	0	0.0461538		558	RNF111	15	59279786	59389618
									559	EFNA2	19	1286152	1301430	6	0	0.0113636		559	EHMT1	9	140513443	140678845	5	0	0.0441176		559	PRC1	15	91509267	91537881	5	2	0.0282761		559	MYCBPAP	17	48585744	48608862	3	0	0.0461538		559	MYO1E	15	59428167	59665071
									560	MUM1	19	1354975	1378430	6	0	0.0113636		560	CACNA1B	9	140772240	141019076	5	0	0.0441176		560	ST8SIA2	15	92937116	93011958	5	2	0.0282761		560	EPN3	17	48610047	48621111	3	0	0.0461538		560	SLTM	15	59171243	59225875
									561	NDUFS7	19	1383882	1395588	6	0	0.0113636		561	HACD4	9	21003619	21031458	5	0	0.0441176		561	C15orf32	15	93014906	93044347	5	2	0.0282761		561	CACNA1G	17	48638428	48704835	3	0	0.0461538		561	CCNB2	15	59397283	59417244
									562	GAMT	19	1397024	1401569	6	0	0.0113636		562	IFNB1	9	21077103	21077962	5	0	0.0441176		562	RGMA	15	93586635	93616389	5	2	0.0282761		562	ANKRD40	17	48770550	48785270	3	0	0.0461538		562	LDHAL6B	15	59499014	59500787
									563	DAZAP1	19	1407567	1435686	6	0	0.0113636		563	IFNW1	9	21140630	21141900	5	0	0.0441176		563	TM2D3	15	102173179	102192594	5	2	0.0282761		563	LUC7L3	17	48796904	48833574	3	0	0.0461538		563	SHISA6	17	11144739	11467380
									564	RPS15	19	1438362	1440496	6	0	0.0113636		564	IFNA21	9	21165635	21166659	5	0	0.0441176		564	LOC100128108	15	102277296	102284972	5	2	0.0282761		564	WFIKKN2	17	48912010	48919714	3	0	0.0461538		564	NCOR1	17	15933407	16097953
									565	APC2	19	1450147	1473243	6	0	0.0113636		565	IFNA4	9	21186616	21187598	5	0	0.0441176		565	OR4F6	15	102345922	102346861	5	2	0.0282761		565	TOB1	17	48939583	48943715	3	0	0.0461538		565	PIGL	17	16120508	16229573
									566	C19orf25	19	1473199	1479228	6	0	0.0113636		566	IFNA7	9	21201467	21202204	5	0	0.0441176		566	OR4F15	15	102358389	102359328	5	2	0.0282761		566	NME1-NME2	17	49230896	49249105	3	0	0.0461538		566	CENPV	17	16245847	16256812
									567	PCSK4	19	1481426	1490449	6	0	0.0113636		567	IFNA10	9	21206179	21207142	5	0	0.0441176		567	C18orf21	18	33552587	33559250	5	2	0.0282761		567	NME1	17	49230919	49239450	3	0	0.0461538		567	LRRC75A	17	16345318	16395505
									568	REEP6	19	1491003	1497924	6	0	0.0113636		568	IFNA16	9	21216371	21217310	5	0	0.0441176		568	NOL4	18	31431063	31628576	5	2	0.0282761		568	NME2	17	49242795	49249105	3	0	0.0461538		568	CCDC144A	17	16593638	16678313
									569	ADAMTSL5	19	1505016	1513188	6	0	0.0113636		569	IFNA17	9	21227241	21228221	5	0	0.0441176		569	KIAA1328	18	34409068	34805297	5	2	0.0282761		569	UTP18	17	49337896	49375294	3	0	0.0461538		569	ZSWIM7	17	15879873	15903006
									570	PLK5	19	1524072	1535455	6	0	0.0113636		570	IFNA14	9	21239200	21239978	5	0	0.0441176		570	SLC14A2	18	42792946	43263072	5	2	0.0282761		570	C17orf112	17	51062879	51065012	3	0	0.0461538		570	TTC19	17	15902693	15932723
									571	MEX3D	19	1554667	1568057	6	0	0.0113636		571	IFNA5	9	21304612	21305312	5	0	0.0441176		571	CDH2	18	25530926	25616549	5	2	0.0282761		571	KIF2B	17	51900238	51902573	3	0	0.0461538		571	UBB	17	16284106	16286059
									572	MBD3	19	1576669	1592760	6	0	0.0113636		572	KLHL9	9	21329669	21335431	5	0	0.0441176		572	KLHL14	18	30252635	30352974	5	2	0.0282761		572	TOM1L1	17	52978051	53015394	3	0	0.0461538		572	TRPV2	17	16318855	16340317
									573	UQCR11	19	1597153	1605483	6	0	0.0113636		573	IFNA6	9	21350316	21350886	5	0	0.0441176		573	CCDC178	18	30517365	31020045	5	2	0.0282761		573	COX11	17	53038566	53046146	3	0	0.0461538		573	ZNF287	17	16450276	16472526
									574	TCF3	19	1609288	1650286	6	0	0.0113636		574	IFNA13	9	21367370	21368075	5	0	0.0441176		574	ASXL3	18	31158540	31331159	5	2	0.0282761		574	NOG	17	54671059	54672951	3	0	0.0461538		574	ZNF624	17	16524047	16557167
									575	ONECUT3	19	1753661	1775444	6	0	0.0113636		575	IFNA2	9	21384253	21385396	5	0	0.0441176		575	DTNA	18	32073253	32409292	5	2	0.0282761		575	C17orf67	17	54869273	54911256	3	0	0.0461538		575	FAM106CP	17	16692056	16693815
									576	ATP8B3	19	1782073	1812236	6	0	0.0113636		576	IFNA8	9	21409145	21410184	5	0	0.0441176		576	MAPRE2	18	32556891	32723434	5	2	0.0282761		576	TRIM25	17	54965269	54991409	3	0	0.0461538		576	DOK6	18	67068283	67516323
									577	KLF16	19	1852397	1863564	6	0	0.0113636		577	IFNA1	9	21440452	21441315	5	0	0.0441176		577	MOCOS	18	33767479	33848685	5	2	0.0282761		577	COIL	17	55015559	55038411	3	0	0.0461538		577	BCL2	18	60790578	60986613
									578	ABHD17A	19	1876974	1885518	6	0	0.0113636		578	IFNE	9	21480837	21482312	5	0	0.0441176		578	FHOD3	18	33877658	34360183	5	2	0.0282761		578	SCPEP1	17	55055467	55084129	3	0	0.0461538		578	ZNF407	18	72342918	72516583
									579	ADAT3	19	1905212	1913446	6	0	0.0113636		579	MTAP	9	21802634	21865970	5	0	0.0441176		579	CELF4	18	34823002	35146000	5	2	0.0282761		579	CCDC182	17	55821841	55822690	3	0	0.0461538		579	VPS4B	18	61056422	61089752
									580	SCAMP4	19	1905212	1926016	6	0	0.0113636		580	CDKN2A	9	21967750	21974826	5	0	0.0441176		580	PIK3C3	18	39535162	39661448	5	2	0.0282761		580	MRPS23	17	55916286	55927433	3	0	0.0461538		580	CDH7	18	63417487	63549202
									581	BTBD2	19	1985446	2015702	6	0	0.0113636		581	GRHPR	9	37422706	37436986	5	0	0.0441176		581	RIT2	18	40323182	40695657	5	2	0.0282761		581	VEZF1	17	56048907	56065625	3	0	0.0461538		581	CDH19	18	64168423	64271375
									582	MKNK2	19	2037469	2051243	6	0	0.0113636		582	ZBTB5	9	37438098	37465407	5	0	0.0441176		582	SETBP1	18	42260137	42457379	5	2	0.0282761		582	SRSF1	17	56078279	56084707	3	0	0.0461538		582	CCDC102B	18	66382490	66722426
									583	MOB3A	19	2071034	2096269	6	0	0.0113636		583	FBXO10	9	37510888	37576250	5	0	0.0441176		583	EPG5	18	43427573	43547305	5	2	0.0282761		583	DYNLL2	17	56160779	56167618	3	0	0.0461538		583	RTTN	18	67671039	67872962
									584	AP3D1	19	2100986	2151556	6	0	0.0113636		584	TOMM5	9	37588409	37592636	5	0	0.0441176		584	PSTPIP2	18	43563501	43652250	5	2	0.0282761		584	OR4D1	17	56232514	56233447	3	0	0.0461538		584	NETO1	18	70409548	70534810
									585	PLEKHJ1	19	2229950	2236352	6	0	0.0113636		585	FRMPD1	9	37651051	37746901	5	0	0.0441176		585	ZNF397	18	32820993	32827153	5	2	0.0282761		585	OR4D2	17	56247016	56247940	3	0	0.0461538		585	CYB5A	18	71920526	71959251
									586	SF3A2	19	2236815	2248678	6	0	0.0113636		586	TRMT10B	9	37753799	37778969	5	0	0.0441176		586	ZSCAN30	18	32831021	32870209	5	2	0.0282761		586	EPX	17	56270084	56282535	3	0	0.0461538		586	CNDP1	18	72201691	72252261
									587	AMH	19	2249277	2252072	6	0	0.0113636		587	EXOSC3	9	37779710	37785089	5	0	0.0441176		587	ZNF24	18	32912171	32924431	5	2	0.0282761		587	MKS1	17	56282796	56296666	3	0	0.0461538		587	SMIM21	18	73121430	73139658
									588	JSRP1	19	2252249	2256422	6	0	0.0113636		588	DCAF10	9	37800550	37867666	5	0	0.0441176		588	ZNF396	18	32946660	32957301	5	2	0.0282761		588	LPO	17	56315786	56345879	3	0	0.0461538		588	ZNF516	18	74069636	74207146
									589	OAZ1	19	2269484	2273487	6	0	0.0113636		589	SLC25A51	9	37887593	37904350	5	0	0.0441176		589	INO80C	18	33048290	33077613	5	2	0.0282761		589	MPO	17	56347216	56358296	3	0	0.0461538		589	ZNF236	18	74534562	74682683
									590	PEAK3	19	2274630	2282181	6	0	0.0113636		590	TMEM252	9	71151495	71155783	5	0	0.0441176		590	GALNT1	18	33234532	33291798	5	2	0.0282761		590	TSPOAP1	17	56378587	56406152	3	0	0.0461538		590	MBP	18	74690788	74729055
									591	LINGO3	19	2289773	2308156	6	0	0.0113636		591	FAM122A	9	71394921	71398795	5	0	0.0441176		591	RPRD1A	18	33569786	33647557	5	2	0.0282761		591	SUPT4H1	17	56422535	56429599	3	0	0.0461538		591	GALR1	18	74962007	74982098
									592	LSM7	19	2321519	2328614	6	0	0.0113636		592	PRKACG	9	71627444	71629039	5	0	0.0441176		592	SLC39A6	18	33688493	33709357	5	2	0.0282761		592	HSF5	17	56497527	56565762	3	0	0.0461538		592	ATP9B	18	76829274	77138283
									593	SPPL2B	19	2328628	2355100	6	0	0.0113636		593	ABHD17B	9	74477367	74526161	5	0	0.0441176		593	ELP2	18	33709836	33757885	5	2	0.0282761		593	MTMR4	17	56566892	56595251	3	0	0.0461538		593	NFATC1	18	77155771	77228002
									594	TMPRSS9	19	2389768	2426256	6	0	0.0113636		594	C9orf57	9	74666296	74675521	5	0	0.0441176		594	TPGS2	18	34359986	34409179	5	2	0.0282761		594	SEPT4	17	56597610	56605408	3	0	0.0461538		594	CTDP1	18	77439800	77514510
									595	TIMM13	19	2425621	2427914	6	0	0.0113636		595	GOLM1	9	88641055	88714510	5	0	0.0441176		595	SYT4	18	40847856	40857615	5	2	0.0282761		595	C17orf47	17	56618947	56621733	3	0	0.0461538		595	HSBP1L1	18	77724581	77730822
									596	LMNB2	19	2428162	2456966	6	0	0.0113636		596	ISCA1	9	88879460	88897490	5	0	0.0441176		596	SLC14A1	18	43304087	43332485	5	2	0.0282761		596	RAD51C	17	56769933	56772741	3	0	0.0461538		596	PARD6G	18	77915114	78005397
									597	GADD45B	19	2476122	2478257	6	0	0.0113636		597	ZCCHC6	9	88902647	88969365	5	0	0.0441176		597	SIGLEC15	18	43405544	43422521	5	2	0.0282761		597	SKA2	17	57187219	57232800	3	0	0.0461538		597	KDSR	18	60994970	61034506
									598	TNFAIP8L1	19	4639526	4655580	6	0	0.0113636		598	GAS1	9	89559276	89562104	5	0	0.0441176		598	ATP5F1A	18	43664109	43678319	5	2	0.0282761		598	SMG8	17	57287370	57292611	3	0	0.0461538		598	SERPINB5	18	61144143	61172318
									599	MYDGF	19	4657556	4670415	6	0	0.0113636		599	C9orf170	9	89763558	89774641	5	0	0.0441176		599	HAUS1	18	43684297	43708299	5	2	0.0282761		599	GDPD1	17	57297827	57350382	3	0	0.0461538		599	SERPINB12	18	61223392	61236560
									600	DPP9-AS1	19	4679293	4685960	6	0	0.0113636		600	SPATA31C1	9	90532876	90538572	5	0	0.0441176		600	TMEM38A	19	16771937	16799831	5	2	0.0282761		600	CLTC	17	57697049	57774317	3	0	0.0461538		600	SERPINB13	18	61254533	61266433
									601	FEM1A	19	4791727	4795571	6	0	0.0113636		601	CDK20	9	90581355	90589695	5	0	0.0441176		601	ZNF709	19	12571997	12595632	5	2	0.0282761		601	PTRH2	17	57774666	57784959	3	0	0.0461538		601	SERPINB4	18	61304492	61311553
									602	TICAM1	19	4815935	4831754	6	0	0.0113636		602	SPATA31C2	9	90744219	90749900	5	0	0.0441176		602	CYP4F8	19	15726028	15740448	5	2	0.0282761		602	TUBD1	17	57936839	57970306	3	0	0.0461538		602	SERPINB3	18	61322430	61329197
									603	ARRDC5	19	4890448	4902879	6	0	0.0113636		603	SPIN1	9	91003296	91093623	5	0	0.0441176		603	CRTC1	19	18794424	18893143	5	2	0.0282761		603	RPS6KB1	17	57970406	58027787	3	0	0.0461538		603	SERPINB11	18	61369537	61391127
									604	UHRF1	19	4903091	4962165	6	0	0.0113636		604	NXNL2	9	91150015	91159462	5	0	0.0441176		604	PPAN-P2RY11	19	10216898	10226065	5	2	0.0282761		604	RNFT1	17	58029722	58042117	3	0	0.0461538		604	SERPINB7	18	61420280	61472610
									605	ZNRF4	19	5455425	5456867	6	0	0.0113636		605	C9orf47	9	91605777	91611057	5	0	0.0441176		605	P2RY11	19	10222196	10226065	5	2	0.0282761		605	HEATR6	17	58120551	58156292	3	0	0.0461538		605	SERPINB2	18	61554938	61571124
									606	SAFB2	19	5587009	5622938	6	0	0.0113636		606	CKS2	9	91926109	91931618	5	0	0.0441176		606	DNM2	19	10828728	10942586	5	2	0.0282761		606	CA4	17	58227296	58236907	3	0	0.0461538		606	SERPINB10	18	61575223	61603345
									607	C19orf70	19	5678424	5680907	6	0	0.0113636		607	SECISBP2	9	91933387	91974578	5	0	0.0441176		607	CARM1	19	10982252	11033448	5	2	0.0282761		607	INTS2	17	59942727	60005377	3	0	0.0461538		607	HMSD	18	61616587	61627646
									608	HSD11B1L	19	5680775	5688534	6	0	0.0113636		608	GADD45G	9	92219926	92221470	5	0	0.0441176		608	SMARCA4	19	11071597	11172958	5	2	0.0282761		608	EFCAB3	17	60447578	60493840	3	0	0.0461538		608	SERPINB8	18	61637262	61653887
									609	RPL36	19	5690271	5691678	6	0	0.0113636		609	DIRAS2	9	93372113	93405387	5	0	0.0441176		609	ZNF440	19	11925106	11946016	5	2	0.0282761		609	METTL2A	17	60501245	60527454	3	0	0.0461538		609	DSEL	18	65173818	65183967
									610	LONP1	19	5691844	5720176	6	0	0.0113636		610	NFIL3	9	94171326	94186144	5	0	0.0441176		610	ZNF700	19	12035882	12061588	5	2	0.0282761		610	MRC2	17	60704761	60770962	3	0	0.0461538		610	TMX3	18	66340924	66382353
									611	PRR22	19	5782970	5784776	6	0	0.0113636		611	SPTLC1	9	94793415	94877756	5	0	0.0441176		611	ZNF490	19	12686919	12721623	5	2	0.0282761		611	DSCAM	21	41384342	42219039	3	0	0.0461538		611	CD226	18	67530191	67615089
									612	DUS3L	19	5785150	5791249	6	0	0.0113636		612	NOL8	9	95059639	95087876	5	0	0.0441176		612	TRIR	19	12841453	12845589	5	2	0.0282761		612	ERG	21	39739182	40033704	3	0	0.0461538		612	SOCS6	18	67956136	67997434
									613	NRTN	19	5823812	5828335	6	0	0.0113636		613	OMD	9	95176526	95186836	5	0	0.0441176		613	MAST1	19	12949258	12985766	5	2	0.0282761		613	B3GALT5	21	40984866	41034816	3	0	0.0461538		613	GTSCR1	18	68297754	68318093
									614	FUT6	19	5830636	5839742	6	0	0.0113636		614	ASPN	9	95218486	95244844	5	0	0.0441176		614	NFIX	19	13106583	13209610	5	2	0.0282761		614	IGSF5	21	41117333	41174023	3	0	0.0461538		614	CBLN2	18	70203914	70211723
									615	FUT3	19	5842898	5851485	6	0	0.0113636		615	FOXE1	9	100615536	100618997	5	0	0.0441176		615	NACC1	19	13229101	13251961	5	2	0.0282761		615	PCP4	21	41239346	41301322	3	0	0.0461538		615	FBXO15	18	71740587	71814999
									616	FUT5	19	5865836	5870551	6	0	0.0113636		616	TRMO	9	100666770	100684852	5	0	0.0441176		616	CACNA1A	19	13317255	13617274	5	2	0.0282761		616	PCBP3	21	47269874	47362368	3	0	0.0461538		616	TIMM21	18	71815745	71826204
									617	VMAC	19	5904851	5910263	6	0	0.0113636		617	HEMGN	9	100689072	100700675	5	0	0.0441176		617	CC2D1A	19	14016955	14041693	5	2	0.0282761		617	YBEY	21	47706243	47712435	3	0	0.0461538		617	C18orf63	18	71983109	72026422
									618	CAPS	19	5913654	5916222	6	0	0.0113636		618	ANP32B	9	100745488	100778225	5	0	0.0441176		618	IL27RA	19	14142551	14163731	5	2	0.0282761		618	PCNT	21	47744035	47865682	3	0	0.0461538		618	FAM69C	18	72102962	72124503
									619	RANBP3	19	5916149	5978320	6	0	0.0113636		619	NANS	9	100818958	100845365	5	0	0.0441176		619	ADGRL1	19	14258548	14316997	5	2	0.0282761		619	DIP2A	21	47878861	47989926	3	0	0.0461538		619	CNDP2	18	72163499	72190689
									620	MLLT1	19	6210391	6279959	6	0	0.0113636		620	TRIM14	9	100846634	100881635	5	0	0.0441176		620	ZNF333	19	14800851	14844558	5	2	0.0282761		620	ETS2	21	40177230	40196879	3	0	0.0461538		620	ZADH2	18	72907062	72917468
									621	ACER1	19	6306509	6333640	6	0	0.0113636		621	TBC1D2	9	100961279	100975833	5	0	0.0441176		621	SLC1A6	19	15060844	15083730	5	2	0.0282761		621	COL6A1	21	47401662	47424963	3	0	0.0461538		621	TSHZ1	18	72922709	73001905
									622	CLPP	19	6361462	6368915	6	0	0.0113636		622	ANKS6	9	101494290	101558824	5	0	0.0441176		622	AKAP8	19	15464331	15490612	5	2	0.0282761		622	COL6A2	21	47518032	47549719	3	0	0.0461538		622	C18orf65	18	74207476	74210045
									623	ALKBH7	19	6372443	6375261	6	0	0.0113636		623	TGFBR1	9	101867370	101916474	5	0	0.0441176		623	CYP4F2	19	15988833	16008930	5	2	0.0282761		623	FTCD	21	47556175	47575481	3	0	0.0461538		623	SALL3	18	76740274	76758969
									624	PSPN	19	6375158	6375927	6	0	0.0113636		624	ALG2	9	101978706	101984246	5	0	0.0441176		624	HSH2D	19	16244837	16269386	5	2	0.0282761		624	SPATC1L	21	47581061	47604373	3	0	0.0461538		624	KCNG2	18	77623667	77659816
									625	GTF2F1	19	6379579	6393291	6	0	0.0113636		625	SEC61B	9	101984569	101992901	5	0	0.0441176		625	EPS15L1	19	16466054	16582823	5	2	0.0282761		625	LSS	21	47608359	47648738	3	0	0.0461538		625	PQLC1	18	77662419	77711653
									626	LOC390877	19	6396369	6412415	6	0	0.0113636		626	NR4A3	9	102584136	102596341	5	0	0.0441176		626	CHERP	19	16628699	16653263	5	2	0.0282761		626	MCM3AP	21	47655038	47705308	3	0	0.0461538		626	TXNL4A	18	77732866	77748592
									627	SLC25A41	19	6426047	6433790	6	0	0.0113636		627	STX17	9	102668914	102736818	5	0	0.0441176		627	NWD1	19	16830786	16928774	5	2	0.0282761		627	C21orf58	21	47720343	47740739	3	0	0.0461538		627	RBFA	18	77794345	77810652
									628	SLC25A23	19	6440074	6459781	6	0	0.0113636		628	TEX10	9	103064356	103114853	5	0	0.0441176		628	CPAMD8	19	17003761	17137625	5	2	0.0282761		628	S100B	21	48018530	48025035	3	0	0.0461538		628	ADNP2	18	77866914	77898229
									629	CRB3	19	6463787	6467232	6	0	0.0113636		629	MSANTD3	9	103189494	103214016	5	0	0.0441176		629	HAUS8	19	17160570	17186343	5	2	0.0282761		629	PRMT2	21	48055506	48075009	3	0	0.0461538		629	PTPRS	19	5205518	5340814
									630	DENND1C	19	6467214	6481819	6	0	0.0113636		630	CAVIN4	9	103340360	103350671	5	0	0.0441176		630	MYO9B	19	17186590	17324104	5	2	0.0282761											630	PLIN3	19	4838345	4867780
									631	TUBB4A	19	6494329	6502595	6	0	0.0113636		631	BAAT	9	104122698	104145801	5	0	0.0441176		631	DDA1	19	17420336	17434107	5	2	0.0282761											631	KDM4B	19	4969123	5153609
									632	TNFSF9	19	6531009	6535939	6	0	0.0113636		632	MRPL50	9	104152248	104160919	5	0	0.0441176		632	PDE4C	19	18318770	18359010	5	2	0.0282761											632	SAFB	19	5623045	5668489
									633	CD70	19	6581656	6591163	6	0	0.0113636		633	ZNF189	9	104161135	104172942	5	0	0.0441176		633	ELL	19	18553472	18632937	5	2	0.0282761											633	CATSPERD	19	5720687	5778742
									634	TNFSF14	19	6661263	6670169	6	0	0.0113636		634	ALDOB	9	104182841	104198062	5	0	0.0441176		634	GDF1	19	18979354	19006953	5	2	0.0282761											634	NDUFA11	19	5891286	5904024
									635	GPR108	19	6729924	6737633	6	0	0.0113636		635	TMEM246	9	104235439	104249052	5	0	0.0441176		635	CERS1	19	18979354	19006953	5	2	0.0282761											635	RFX2	19	5993174	6110664
									636	TRIP10	19	6739692	6751537	6	0	0.0113636		636	RNF20	9	104296130	104325626	5	0	0.0441176		636	SUGP2	19	19101695	19144380	5	2	0.0282761											636	ACSBG2	19	6135643	6193114
									637	SH2D3A	19	6752170	6767523	6	0	0.0113636		637	PPP3R2	9	104353896	104357283	5	0	0.0441176		637	MEF2B	19	19256375	19281098	5	2	0.0282761											637	KHSRP	19	6413114	6424822
									638	ADGRE1	19	6887559	6940464	6	0	0.0113636		638	SMC2	9	106856540	106903700	5	0	0.0441176		638	BORCS8-MEF2B	19	19256375	19303400	5	2	0.0282761											638	C3	19	6677845	6720693
									639	MBD3L5	19	7030593	7033022	6	0	0.0113636		639	OR13F1	9	107266543	107267503	5	0	0.0441176		639	SUGP1	19	19387321	19431321	5	2	0.0282761											639	MUC16	19	8959519	9092018
									640	MBD3L4	19	7037754	7040184	6	0	0.0113636		640	OR13C4	9	107288533	107289490	5	0	0.0441176		640	GATAD2A	19	19496641	19619741	5	2	0.0282761											640	FEM1A	19	4791727	4795571
									641	MBD3L2	19	7049350	7051746	6	0	0.0113636		641	OR13C3	9	107298050	107299094	5	0	0.0441176		641	C19orf66	19	10196794	10203928	5	2	0.0282761											641	TICAM1	19	4815935	4831754
									642	MBD3L3	19	7056215	7058645	6	0	0.0113636		642	OR13C8	9	107331448	107332411	5	0	0.0441176		642	ANGPTL6	19	10203012	10213425	5	2	0.0282761											642	ARRDC5	19	4890448	4902879
									643	PEX11G	19	7541755	7553924	6	0	0.0113636		643	OR13C5	9	107360737	107361694	5	0	0.0441176		643	PPAN	19	10216898	10222679	5	2	0.0282761											643	UHRF1	19	4903091	4962165
									644	TEX45	19	7562444	7573336	6	0	0.0113636		644	OR13C2	9	107366951	107367908	5	0	0.0441176		644	EIF3G	19	10225689	10230600	5	2	0.0282761											644	ZNRF4	19	5455425	5456867
									645	ZNF358	19	7581003	7585911	6	0	0.0113636		645	OR13C9	9	107379528	107380485	5	0	0.0441176		645	DNMT1	19	10244019	10305730	5	2	0.0282761											645	SAFB2	19	5587009	5622938
									646	MCOLN1	19	7587495	7598895	6	0	0.0113636		646	OR13D1	9	107456702	107457743	5	0	0.0441176		646	QTRT1	19	10812111	10824043	5	2	0.0282761											646	C19orf70	19	5678424	5680907
									647	CAMSAP3	19	7660787	7683196	6	0	0.0113636		647	NIPSNAP3A	9	107509848	107522405	5	0	0.0441176		647	TMED1	19	10942742	10946983	5	2	0.0282761											647	HSD11B1L	19	5680775	5688534
									648	XAB2	19	7684410	7694439	6	0	0.0113636		648	NIPSNAP3B	9	107526021	107540045	5	0	0.0441176		648	C19orf38	19	10959105	10980360	5	2	0.0282761											648	RPL36	19	5690271	5691678
									649	PET100	19	7694670	7696510	6	0	0.0113636		649	TAL2	9	108424737	108425393	5	0	0.0441176		649	YIPF2	19	11033443	11039343	5	2	0.0282761											649	LONP1	19	5691844	5720176
									650	PCP2	19	7696500	7697898	6	0	0.0113636		650	RAD23B	9	110045516	110094475	5	0	0.0441176		650	TIMM29	19	11039423	11040917	5	2	0.0282761											650	PRR22	19	5782970	5784776
									651	STXBP2	19	7701986	7712760	6	0	0.0113636		651	KLF4	9	110247132	110252001	5	0	0.0441176		651	ZNF823	19	11832079	11849824	5	2	0.0282761											651	DUS3L	19	5785150	5791249
									652	RETN	19	7733971	7735340	6	0	0.0113636		652	ACTL7B	9	111616867	111618275	5	0	0.0441176		652	ZNF441	19	11877814	11894893	5	2	0.0282761											652	NRTN	19	5823812	5828335
									653	MCEMP1	19	7741942	7744719	6	0	0.0113636		653	ACTL7A	9	111624507	111626035	5	0	0.0441176		653	ZNF491	19	11909390	11919306	5	2	0.0282761											653	FUT6	19	5830636	5839742
									654	TRAPPC5	19	7745706	7747748	6	0	0.0113636		654	FAM206A	9	111696672	111703238	5	0	0.0441176		654	ZNF439	19	11976843	11980306	5	2	0.0282761											654	FUT3	19	5842898	5851485
									655	FCER2	19	7753642	7764365	6	0	0.0113636		655	CTNNAL1	9	111704848	111775874	5	0	0.0441176		655	ZNF69	19	11998598	12025366	5	2	0.0282761											655	FUT5	19	5865836	5870551
									656	CLEC4G	19	7793842	7797057	6	0	0.0113636		656	FRRS1L	9	111892572	111929571	5	0	0.0441176		656	ZNF763	19	12075868	12091214	5	2	0.0282761											656	VMAC	19	5904851	5910263
									657	CD209	19	7804878	7812464	6	0	0.0113636		657	C9orf152	9	112961840	112970413	5	0	0.0441176		657	ZNF433	19	12125531	12146556	5	2	0.0282761											657	CAPS	19	5913654	5916222
									658	CLEC4M	19	7828034	7834491	6	0	0.0113636		658	TXN	9	113006091	113018920	5	0	0.0441176		658	ZNF878	19	12154619	12163782	5	2	0.0282761											658	RANBP3	19	5916149	5978320
									659	EVI5L	19	7895160	7929862	6	0	0.0113636		659	TXNDC8	9	113065866	113100164	5	0	0.0441176		659	ZNF844	19	12175513	12188631	5	2	0.0282761											659	MLLT1	19	6210391	6279959
									660	PRR36	19	7933604	7939326	6	0	0.0113636		660	OR2K2	9	114089762	114090713	5	0	0.0441176		660	ZNF788P	19	12203077	12225567	5	2	0.0282761											660	ACER1	19	6306509	6333640
									661	LRRC8E	19	7953389	7966908	6	0	0.0113636		661	PTGR1	9	114312001	114362135	5	0	0.0441176		661	ZNF20	19	12242164	12251222	5	2	0.0282761											661	CLPP	19	6361462	6368915
									662	MAP2K7	19	7968664	7979368	6	0	0.0113636		662	DNAJC25	9	114393631	114416631	5	0	0.0441176		662	ZNF625	19	12255704	12267546	5	2	0.0282761											662	ALKBH7	19	6372443	6375261
									663	TGFBR3L	19	7981031	7983980	6	0	0.0113636		663	C9orf84	9	114448798	114521813	5	0	0.0441176		663	ZNF136	19	12273861	12300696	5	2	0.0282761											663	PSPN	19	6375158	6375927
									664	SNAPC2	19	7985193	7988136	6	0	0.0113636		664	SLC46A2	9	115641199	115653193	5	0	0.0441176		664	ZNF44	19	12382622	12405714	5	2	0.0282761											664	GTF2F1	19	6379579	6393291
									665	CTXN1	19	7989380	7991051	6	0	0.0113636		665	ZNF883	9	115759399	115774472	5	0	0.0441176		665	ZNF563	19	12428290	12444534	5	2	0.0282761											665	LOC390877	19	6396369	6412415
									666	ELAVL1	19	8023456	8070529	6	0	0.0113636		666	ZFP37	9	115804094	115819071	5	0	0.0441176		666	ZNF442	19	12460184	12476475	5	2	0.0282761											666	SLC25A41	19	6426047	6433790
									667	FBN3	19	8130285	8213753	6	0	0.0113636		667	SLC31A2	9	115913237	115926422	5	0	0.0441176		667	ZNF799	19	12500827	12511794	5	2	0.0282761											667	SLC25A23	19	6440074	6459781
									668	CERS4	19	8274216	8327305	6	0	0.0113636		668	FKBP15	9	115927799	115983641	5	0	0.0441176		668	ZNF443	19	12540519	12551926	5	2	0.0282761											668	CRB3	19	6463787	6467232
									669	CD320	19	8367010	8373240	6	0	0.0113636		669	CDC26	9	116029287	116037869	5	0	0.0441176		669	ZNF564	19	12636183	12662356	5	2	0.0282761											669	DENND1C	19	6467214	6481819
									670	NDUFA7	19	8376233	8386297	6	0	0.0113636		670	PRPF4	9	116037913	116055185	5	0	0.0441176		670	ZNF791	19	12721731	12740676	5	2	0.0282761											670	TUBB4A	19	6494329	6502595
									671	RPS28	19	8386383	8387280	6	0	0.0113636		671	RNF183	9	116059372	116061320	5	0	0.0441176		671	MAN2B1	19	12757321	12777591	5	2	0.0282761											671	TNFSF9	19	6531009	6535939
									672	ANGPTL4	19	8429010	8439259	6	0	0.0113636		672	WDR31	9	116075501	116102620	5	0	0.0441176		672	WDR83	19	12777617	12786646	5	2	0.0282761											672	CD70	19	6581656	6591163
									673	RAB11B	19	8455204	8469318	6	0	0.0113636		673	HDHD3	9	116135695	116138341	5	0	0.0441176		673	WDR83OS	19	12778880	12780465	5	2	0.0282761											673	TNFSF14	19	6661263	6670169
									674	MARCH2	19	8478186	8503901	6	0	0.0113636		674	ALAD	9	116148591	116163400	5	0	0.0441176		674	DHPS	19	12786530	12792025	5	2	0.0282761											674	MBD3L1	19	8953268	8954016
									675	PRAM1	19	8554939	8567538	6	0	0.0113636		675	POLE3	9	116169514	116173029	5	0	0.0441176		675	GNG14	19	12798811	12799234	5	2	0.0282761											675	ZNF560	19	9577030	9609279
									676	ZNF414	19	8575461	8579048	6	0	0.0113636		676	C9orf43	9	116172923	116191964	5	0	0.0441176		676	FBXW9	19	12799729	12807455	5	2	0.0282761											676	ZNF846	19	9868150	9879410
									677	MYO1F	19	8585673	8642331	6	0	0.0113636		677	OLFML2A	9	127539436	127577170	5	0	0.0441176		677	TNPO2	19	12810007	12833105	5	2	0.0282761											677	FBXL12	19	9920942	9929779
									678	ACTL9	19	8807746	8809180	6	0	0.0113636		678	WDR38	9	127615695	127620170	5	0	0.0441176		678	ASNA1	19	12848272	12859138	5	2	0.0282761											678	UBL5	19	9938555	9940797
									679	OR2Z1	19	8841315	8842371	6	0	0.0113636		679	RPL35	9	127620157	127624240	5	0	0.0441176		679	BEST2	19	12863406	12869272	5	2	0.0282761
									680	ZNF558	19	8920251	8932739	6	0	0.0113636		680	ARPC5L	9	127624396	127640012	5	0	0.0441176		680	HOOK2	19	12873816	12886434	5	2	0.0282761
									681	OR1M1	19	9203920	9204862	6	0	0.0113636		681	LMX1B	9	129376721	129463311	5	0	0.0441176		681	JUNB	19	12902309	12904125	5	2	0.0282761
									682	OR7G2	19	9212944	9213982	6	0	0.0113636		682	ZBTB43	9	129567284	129600489	5	0	0.0441176		682	PRDX2	19	12907633	12912724	5	2	0.0282761
									683	OR7G1	19	9225503	9226439	6	0	0.0113636		683	ANGPTL2	9	129849627	129885044	5	0	0.0441176		683	RNASEH2A	19	12917427	12924462	5	2	0.0282761
									684	OR7G3	19	9236687	9237626	6	0	0.0113636		684	SLC2A8	9	130159416	130170177	5	0	0.0441176		684	RTBDN	19	12936290	12941230	5	2	0.0282761
									685	ZNF317	19	9251055	9274091	6	0	0.0113636		685	ZNF79	9	130186652	130207651	5	0	0.0441176		685	DNASE2	19	12986024	12992335	5	2	0.0282761
									686	OR7D2	19	9296269	9299493	6	0	0.0113636		686	RPL12	9	130209952	130213711	5	0	0.0441176		686	KLF1	19	12995235	12998017	5	2	0.0282761
									687	OR7D4	19	9324525	9325547	6	0	0.0113636		687	LRSAM1	9	130213764	130265780	5	0	0.0441176		687	GCDH	19	13001942	13010813	5	2	0.0282761
									688	OR7E24	19	9361719	9362739	6	0	0.0113636		688	CFAP157	9	130469270	130476303	5	0	0.0441176		688	SYCE2	19	13009893	13030086	5	2	0.0282761
									689	ZNF699	19	9401815	9420390	6	0	0.0113636		689	PTRH1	9	130475941	130477955	5	0	0.0441176		689	FARSA	19	13033283	13044558	5	2	0.0282761
									690	ZNF177	19	9473695	9493293	6	0	0.0113636		690	TTC16	9	130478342	130493879	5	0	0.0441176		690	CALR	19	13049413	13055304	5	2	0.0282761
									691	ZNF266	19	9523101	9546254	6	0	0.0113636		691	TOR2A	9	130493802	130497628	5	0	0.0441176		691	RAD23A	19	13056627	13064457	5	2	0.0282761
									692	ZNF560	19	9577030	9609279	6	0	0.0113636		692	SH2D3C	9	130500595	130517561	5	0	0.0441176		692	GADD45GIP1	19	13064969	13068068	5	2	0.0282761
									693	ZNF426	19	9633899	9649321	6	0	0.0113636		693	CDK9	9	130548304	130553052	5	0	0.0441176		693	DAND5	19	13080431	13085567	5	2	0.0282761
									694	ZNF121	19	9676403	9695209	6	0	0.0113636		694	FPGS	9	130565136	130576360	5	0	0.0441176		694	LYL1	19	13209841	13213974	5	2	0.0282761
									695	ZNF561	19	9718001	9731916	6	0	0.0113636		695	ENG	9	130577290	130609446	5	0	0.0441176		695	TRMT1	19	13215713	13227463	5	2	0.0282761
									696	ZNF562	19	9759329	9785776	6	0	0.0113636		696	AK1	9	130628758	130635827	5	0	0.0441176		696	STX10	19	13254871	13261188	5	2	0.0282761
									697	ZNF846	19	9868150	9879410	6	0	0.0113636		697	ST6GALNAC6	9	130647599	130659687	5	0	0.0441176		697	IER2	19	13261281	13265722	5	2	0.0282761
									698	FBXL12	19	9920942	9929779	6	0	0.0113636		698	PIP5KL1	9	130683807	130689770	5	0	0.0441176		698	CCDC130	19	13842573	13874112	5	2	0.0282761
									699	UBL5	19	9938555	9940797	6	0	0.0113636		699	DPM2	9	130697373	130700763	5	0	0.0441176		699	MRI1	19	13875327	13885096	5	2	0.0282761
									700	LDB2	4	16503156	16900432	5	0	0.0336538		700	FAM102A	9	130702860	130712993	5	0	0.0441176		700	C19orf53	19	13885256	13889587	5	2	0.0282761
									701	TMEM33	4	41937136	41962824	5	0	0.0336538		701	NAIF1	9	130823511	130829599	5	0	0.0441176		701	ZSWIM4	19	13906273	13943044	5	2	0.0282761
									702	LIN54	4	83845755	83931987	5	0	0.0336538		702	SLC25A25	9	130830478	130871524	5	0	0.0441176		702	NANOS3	19	13988062	13991571	5	2	0.0282761
									703	LEF1	4	108968700	109087953	5	0	0.0336538		703	PTGES2	9	130882971	130890467	5	0	0.0441176		703	C19orf57	19	13993160	14016978	5	2	0.0282761
									704	IL15	4	142557748	142655140	5	0	0.0336538		704	LCN2	9	130911708	130915734	5	0	0.0441176		704	PODNL1	19	14041999	14049289	5	2	0.0282761
									705	SPOCK3	4	167654534	168155577	5	0	0.0336538		705	C9orf16	9	130922538	130926207	5	0	0.0441176		705	DCAF15	19	14063285	14072261	5	2	0.0282761
									706	NCAPG	4	17812435	17846488	5	0	0.0336538		706	DNM1	9	130965633	131017527	5	0	0.0441176		706	RFX1	19	14072341	14117134	5	2	0.0282761
									707	PPARGC1A	4	23793643	24474452	5	0	0.0336538		707	GOLGA2	9	131018107	131038268	5	0	0.0441176		707	RLN3	19	14138959	14142370	5	2	0.0282761
									708	GRXCR1	4	42895282	43032675	5	0	0.0336538		708	SWI5	9	131037657	131051268	5	0	0.0441176		708	PALM3	19	14164178	14169971	5	2	0.0282761
									709	GABRB1	4	47033294	47428462	5	0	0.0336538		709	COQ4	9	131084786	131096351	5	0	0.0441176		709	MISP3	19	14183820	14185874	5	2	0.0282761
									710	CFAP299	4	81256873	81884910	5	0	0.0336538		710	SLC27A4	9	131102838	131123749	5	0	0.0441176		710	C19orf67	19	14192443	14196607	5	2	0.0282761
									711	MAPK10	4	86933448	87275797	5	0	0.0336538		711	URM1	9	131133597	131154295	5	0	0.0441176		711	SAMD1	19	14198651	14201387	5	2	0.0282761
									712	ABCG2	4	89011415	89152474	5	0	0.0336538		712	CERCAM	9	131181438	131199630	5	0	0.0441176		712	PRKACA	19	14202499	14219202	5	2	0.0282761
									713	GPRIN3	4	90165428	90229161	5	0	0.0336538		713	GPR107	9	132815984	132892303	5	0	0.0441176		713	ASF1B	19	14230320	14247440	5	2	0.0282761
									714	GRID2	4	93225549	94695707	5	0	0.0336538		714	NCS1	9	132934856	132999583	5	0	0.0441176		714	CLEC17A	19	14693895	14721956	5	2	0.0282761
									715	PDLIM5	4	95373007	95509370	5	0	0.0336538		715	ASS1	9	133320093	133376661	5	0	0.0441176		715	ADGRE3	19	14729928	14785730	5	2	0.0282761
									716	UNC5C	4	96083654	96470361	5	0	0.0336538		716	FUBP3	9	133454959	133513739	5	0	0.0441176		716	ADGRE2	19	14843508	14887739	5	2	0.0282761
									717	STPG2	4	98480024	99064391	5	0	0.0336538		717	PRDM12	9	133539980	133558384	5	0	0.0441176		717	OR7C1	19	14909985	14910948	5	2	0.0282761
									718	BANK1	4	102711763	102995969	5	0	0.0336538		718	EXOSC2	9	133569146	133580281	5	0	0.0441176		718	OR7A5	19	14937138	14939276	5	2	0.0282761
									719	CISD2	4	103790134	103813964	5	0	0.0336538		719	QRFP	9	133768814	133772199	5	0	0.0441176		719	OR7A10	19	14951759	14952689	5	2	0.0282761
									720	SLC9B1	4	103806204	103940896	5	0	0.0336538		720	FIBCD1	9	133777824	133814239	5	0	0.0441176		720	OR7A17	19	14991237	14992167	5	2	0.0282761
									721	COL25A1	4	109731876	110223799	5	0	0.0336538		721	AIF1L	9	133971862	133998539	5	0	0.0441176		721	OR7C2	19	15052300	15053260	5	2	0.0282761
									722	ALPK1	4	113218498	113363774	5	0	0.0336538		722	CEL	9	135937364	135947250	5	0	0.0441176		722	CCDC105	19	15121538	15134083	5	2	0.0282761
									723	ANK2	4	113739238	114304896	5	0	0.0336538		723	RALGDS	9	135973106	135996637	5	0	0.0441176		723	CASP14	19	15160290	15169104	5	2	0.0282761
									724	INPP4B	4	142944312	143767688	5	0	0.0336538		724	GBGT1	9	136028334	136039332	5	0	0.0441176		724	OR1I1	19	15197876	15198944	5	2	0.0282761
									725	ZNF827	4	146678778	146860112	5	0	0.0336538		725	OBP2B	9	136080665	136084637	5	0	0.0441176		725	SYDE1	19	15218174	15225799	5	2	0.0282761
									726	TTC29	4	147627789	147867038	5	0	0.0336538		726	ABO	9	136130562	136150630	5	0	0.0441176		726	ILVBL	19	15225784	15236610	5	2	0.0282761
									727	SH3D19	4	152041432	152096704	5	0	0.0336538		727	SURF6	9	136197542	136203047	5	0	0.0441176		727	NOTCH3	19	15270443	15311792	5	2	0.0282761
									728	TRIM2	4	154074269	154260474	5	0	0.0336538		728	MED22	9	136207750	136215011	5	0	0.0441176		728	EPHX3	19	15337729	15343231	5	2	0.0282761
									729	DCHS2	4	155155526	155312449	5	0	0.0336538		729	RPL7A	9	136215068	136218280	5	0	0.0441176		729	BRD4	19	15348300	15391262	5	2	0.0282761
									730	FSTL5	4	162305043	163085186	5	0	0.0336538		730	SURF1	9	136218659	136223361	5	0	0.0441176		730	AKAP8L	19	15490858	15529932	5	2	0.0282761
									731	MARCH1	4	164445449	165304407	5	0	0.0336538		731	SURF2	9	136223420	136228041	5	0	0.0441176		731	WIZ	19	15532317	15543345	5	2	0.0282761
									732	MFAP3L	4	170907747	170924943	5	0	0.0336538		732	SURF4	9	136228324	136243037	5	0	0.0441176		732	RASAL3	19	15562434	15575392	5	2	0.0282761
									733	GALNTL6	4	172734574	173961559	5	0	0.0336538		733	STKLD1	9	136243283	136271220	5	0	0.0441176		733	PGLYRP2	19	15579455	15590315	5	2	0.0282761
									734	NEIL3	4	178230990	178284092	5	0	0.0336538		734	REXO4	9	136271181	136283216	5	0	0.0441176		734	CYP4F22	19	15619335	15663128	5	2	0.0282761
									735	TENM3	4	183164583	183724177	5	0	0.0336538		735	CACFD1	9	136325086	136335909	5	0	0.0441176		735	CYP4F3	19	15751706	15771570	5	2	0.0282761
									736	PRIMPOL	4	185570766	185616113	5	0	0.0336538		736	SLC2A6	9	136336215	136344276	5	0	0.0441176		736	CYP4F12	19	15783827	15807984	5	2	0.0282761
									737	FAM184B	4	17633695	17783135	5	0	0.0336538		737	MYMK	9	136379707	136390068	5	0	0.0441176		737	OR10H2	19	15838833	15839862	5	2	0.0282761
									738	LCORL	4	17842821	18023498	5	0	0.0336538		738	ADAMTSL2	9	136397285	136440641	5	0	0.0441176		738	OR10H3	19	15852202	15853153	5	2	0.0282761
									739	ADGRA3	4	22388996	22517677	5	0	0.0336538		739	FAM163B	9	136443536	136445368	5	0	0.0441176		739	OR10H5	19	15904858	15905806	5	2	0.0282761
									740	CCDC149	4	24807738	24914600	5	0	0.0336538		740	DBH	9	136501484	136524466	5	0	0.0441176		740	OR10H1	19	15917816	15918936	5	2	0.0282761
									741	SEL1L3	4	25749048	25864653	5	0	0.0336538		741	BRD3	9	136895426	136933141	5	0	0.0441176		741	LINC01835	19	15962802	15975714	5	2	0.0282761
									742	RBPJ	4	26321331	26436753	5	0	0.0336538		742	WDR5	9	137001209	137025094	5	0	0.0441176		742	CYP4F11	19	16023179	16045676	5	2	0.0282761
									743	TBC1D19	4	26585545	26757835	5	0	0.0336538		743	FCN2	9	137772657	137779366	5	0	0.0441176		743	OR10H4	19	16059817	16060768	5	2	0.0282761
									744	STIM2	4	26862312	27027003	5	0	0.0336538		744	FCN1	9	137795081	137809849	5	0	0.0441176		744	TPM4	19	16178316	16213813	5	2	0.0282761
									745	PCDH7	4	30722036	31148423	5	0	0.0336538		745	OLFM1	9	137967088	138013030	5	0	0.0441176		745	RAB8A	19	16222489	16244445	5	2	0.0282761
									746	NWD2	4	37246689	37451087	5	0	0.0336538		746	C9orf62	9	138235094	138238408	5	0	0.0441176		746	CIB3	19	16272178	16284336	5	2	0.0282761
									747	C4orf19	4	37455551	37595132	5	0	0.0336538		747	PPP1R26	9	138371647	138380739	5	0	0.0441176		747	FAM32A	19	16296211	16302857	5	2	0.0282761
									748	RELL1	4	37592421	37687999	5	0	0.0336538		748	C9orf116	9	138387025	138391761	5	0	0.0441176		748	AP1M1	19	16308664	16346156	5	2	0.0282761
									749	TBC1D1	4	37892704	38140796	5	0	0.0336538		749	MRPS2	9	138392476	138396519	5	0	0.0441176		749	KLF2	19	16435636	16439473	5	2	0.0282761
									750	KLF3	4	38665789	38703129	5	0	0.0336538		750	LCN1	9	138413283	138418386	5	0	0.0441176		750	CALR3	19	16589867	16607003	5	2	0.0282761
									751	FAM114A1	4	38869353	38947365	5	0	0.0336538		751	OBP2A	9	138437984	138441815	5	0	0.0441176		751	C19orf44	19	16607121	16629269	5	2	0.0282761
									752	KLHL5	4	39046450	39127853	5	0	0.0336538		752	PAEP	9	138453601	138458622	5	0	0.0441176		752	SLC35E1	19	16660647	16683193	5	2	0.0282761
									753	WDR19	4	39184023	39287430	5	0	0.0336538		753	GLT6D1	9	138515501	138531386	5	0	0.0441176		753	MED26	19	16685717	16739015	5	2	0.0282761
									754	RFC1	4	39289068	39368001	5	0	0.0336538		754	LCN9	9	138555167	138557949	5	0	0.0441176		754	SMIM7	19	16756958	16770968	5	2	0.0282761
									755	KLB	4	39408472	39453153	5	0	0.0336538		755	SOHLH1	9	138585252	138591374	5	0	0.0441176		755	SIN3B	19	16940197	16991164	5	2	0.0282761
									756	SLC30A9	4	41992522	42089551	5	0	0.0336538		756	CAMSAP1	9	138700332	138799005	5	0	0.0441176		756	F2RL3	19	16999670	17003411	5	2	0.0282761
									757	ATP8A1	4	42410389	42659122	5	0	0.0336538		757	UBAC1	9	138824814	138853226	5	0	0.0441176		757	USE1	19	17326154	17330638	5	2	0.0282761
									758	KCTD8	4	44175919	44450824	5	0	0.0336538		758	TMEM250	9	139006426	139010277	5	0	0.0441176		758	OCEL1	19	17337012	17340028	5	2	0.0282761
									759	GUF1	4	44680411	44702697	5	0	0.0336538		759	LHX3	9	139088095	139095019	5	0	0.0441176		759	NR2F6	19	17342693	17356151	5	2	0.0282761
									760	GABRA2	4	46245564	46391396	5	0	0.0336538		760	QSOX2	9	139098178	139137687	5	0	0.0441176		760	USHBP1	19	17360829	17375605	5	2	0.0282761
									761	COX7B2	4	46736843	46911252	5	0	0.0336538		761	GPSM1	9	139221931	139236288	5	0	0.0441176		761	BABAM1	19	17378184	17390162	5	2	0.0282761
									762	GABRA4	4	46920916	46995522	5	0	0.0336538		762	DNLZ	9	139256351	139258263	5	0	0.0441176		762	ANKLE1	19	17392453	17398455	5	2	0.0282761
									763	ATP10D	4	47487409	47595503	5	0	0.0336538		763	CARD9	9	139258407	139268133	5	0	0.0441176		763	ABHD8	19	17402939	17414282	5	2	0.0282761
									764	CORIN	4	47596014	47840123	5	0	0.0336538		764	SNAPC4	9	139270020	139292889	5	0	0.0441176		764	MRPL34	19	17416476	17417652	5	2	0.0282761
									765	SPATA18	4	52917496	52963471	5	0	0.0336538		765	SDCCAG3	9	139296373	139305054	5	0	0.0441176		765	ANO8	19	17434031	17445638	5	2	0.0282761
									766	ANTXR2	4	80822770	80994477	5	0	0.0336538		766	PMPCA	9	139305024	139318213	5	0	0.0441176		766	GTPBP3	19	17445790	17453540	5	2	0.0282761
									767	PRKG2	4	82008523	82075311	5	0	0.0336538		767	SEC16A	9	139334547	139377507	5	0	0.0441176		767	PLVAP	19	17462256	17488158	5	2	0.0282761
									768	ENOPH1	4	83351632	83382328	5	0	0.0336538		768	C9orf163	9	139377946	139380519	5	0	0.0441176		768	BST2	19	17513747	17516457	5	2	0.0282761
									769	SCD5	4	83550689	83720010	5	0	0.0336538		769	NOTCH1	9	139388884	139440238	5	0	0.0441176		769	MVB12A	19	17516494	17536148	5	2	0.0282761
									770	SEC31A	4	83739661	83812433	5	0	0.0336538		770	FAM69B	9	139607023	139619170	5	0	0.0441176		770	TMEM221	19	17546317	17559376	5	2	0.0282761
									771	PLAC8	4	84011200	84031012	5	0	0.0336538		771	LCN10	9	139632618	139637411	5	0	0.0441176		771	NXNL1	19	17566233	17571725	5	2	0.0282761
									772	WDFY3	4	85590689	85887544	5	0	0.0336538		772	LCN6	9	139638468	139642980	5	0	0.0441176		772	SLC27A1	19	17581252	17616977	5	2	0.0282761
									773	ARHGAP24	4	86396283	86923823	5	0	0.0336538		773	LCN8	9	139648839	139652731	5	0	0.0441176		773	PGLS	19	17622431	17632097	5	2	0.0282761
									774	PTPN13	4	87515467	87736329	5	0	0.0336538		774	LCN15	9	139654085	139658965	5	0	0.0441176		774	FAM129C	19	17634109	17662835	5	2	0.0282761
									775	AFF1	4	87856153	88062206	5	0	0.0336538		775	TMEM141	9	139685776	139687769	5	0	0.0441176		775	COLGALT1	19	17666402	17693971	5	2	0.0282761
									776	PKD2	4	88928798	88998931	5	0	0.0336538		776	CCDC183	9	139690789	139702193	5	0	0.0441176		776	UNC13A	19	17712136	17799008	5	2	0.0282761
									777	HERC5	4	89378267	89427321	5	0	0.0336538		777	AJM1	9	139738866	139741797	5	0	0.0441176		777	MAP1S	19	17830260	17845324	5	2	0.0282761
									778	HERC3	4	89513573	89578585	5	0	0.0336538		778	PHPT1	9	139743267	139745495	5	0	0.0441176		778	FCHO1	19	17858526	17899377	5	2	0.0282761
									779	FAM13A	4	89647104	89744512	5	0	0.0336538		779	MAMDC4	9	139746818	139755251	5	0	0.0441176		779	IQCN	19	18367905	18385319	5	2	0.0282761
									780	SMARCAD1	4	95128758	95212443	5	0	0.0336538		780	EDF1	9	139756565	139760788	5	0	0.0441176		780	JUND	19	18390503	18392466	5	2	0.0282761
									781	BMPR1B	4	95679127	96079601	5	0	0.0336538		781	TRAF2	9	139780964	139821067	5	0	0.0441176		781	LSM4	19	18417039	18434001	5	2	0.0282761
									782	RAP1GDS1	4	99182526	99365012	5	0	0.0336538		782	FBXW5	9	139834884	139839206	5	0	0.0441176		782	PGPEP1	19	18451396	18480762	5	2	0.0282761
									783	TSPAN5	4	99391517	99579812	5	0	0.0336538		783	C8G	9	139839697	139841426	5	0	0.0441176		783	GDF15	19	18496769	18499987	5	2	0.0282761
									784	ADH5	4	99992128	100009939	5	0	0.0336538		784	LCN12	9	139846767	139849949	5	0	0.0441176		784	LRRC25	19	18501953	18508415	5	2	0.0282761
									785	ADH6	4	100123794	100140403	5	0	0.0336538		785	PTGDS	9	139871955	139876194	5	0	0.0441176		785	SSBP4	19	18530145	18545372	5	2	0.0282761
									786	ADH1C	4	100257648	100274202	5	0	0.0336538		786	LCNL1	9	139877444	139880210	5	0	0.0441176		786	ISYNA1	19	18545197	18548119	5	2	0.0282761
									787	MTTP	4	100485234	100545154	5	0	0.0336538		787	PAXX	9	139886869	139888440	5	0	0.0441176		787	FKBP8	19	18642561	18654406	5	2	0.0282761
									788	EMCN	4	101316497	101439250	5	0	0.0336538		788	CLIC3	9	139889059	139891024	5	0	0.0441176		788	KXD1	19	18668571	18680197	5	2	0.0282761
									789	PPP3CA	4	101944586	102268628	5	0	0.0336538		789	ABCA2	9	139901685	139922740	5	0	0.0441176		789	UBA52	19	18682539	18688270	5	2	0.0282761
									790	MANBA	4	103552642	103682151	5	0	0.0336538		790	C9orf139	9	139921915	139931234	5	0	0.0441176		790	REX1BD	19	18699494	18703147	5	2	0.0282761
									791	CENPE	4	104026962	104119566	5	0	0.0336538		791	FUT7	9	139924625	139927292	5	0	0.0441176		791	CRLF1	19	18704034	18717660	5	2	0.0282761
									792	TACR3	4	104510624	104640973	5	0	0.0336538		792	NPDC1	9	139933908	139940676	5	0	0.0441176		792	KLHL26	19	18747774	18778434	5	2	0.0282761
									793	TET2	4	106067841	106200960	5	0	0.0336538		793	ENTPD2	9	139942549	139948503	5	0	0.0441176		793	COMP	19	18893582	18902114	5	2	0.0282761
									794	PPA2	4	106290233	106395227	5	0	0.0336538		794	SAPCD2	9	139956578	139965028	5	0	0.0441176		794	UPF1	19	18942743	18979039	5	2	0.0282761
									795	ARHGEF38	4	106473776	106602070	5	0	0.0336538		795	UAP1L1	9	139971952	139978990	5	0	0.0441176		795	COPE	19	19010319	19030212	5	2	0.0282761
									796	GSTCD	4	106629940	106768882	5	0	0.0336538		796	DPP7	9	140004991	140009195	5	0	0.0441176		796	DDX49	19	19030483	19039442	5	2	0.0282761
									797	NPNT	4	106816596	106892828	5	0	0.0336538		797	GRIN1	9	140033608	140063214	5	0	0.0441176		797	HOMER3	19	19040009	19049858	5	2	0.0282761
									798	TBCK	4	106965473	107237423	5	0	0.0336538		798	LRRC26	9	140063209	140064491	5	0	0.0441176		798	ARMC6	19	19144386	19168987	5	2	0.0282761
									799	DKK2	4	107842958	107957453	5	0	0.0336538		799	TMEM210	9	140065379	140066498	5	0	0.0441176		799	SLC25A42	19	19174769	19223839	5	2	0.0282761
									800	SGMS2	4	108745720	108836203	5	0	0.0336538		800	ANAPC2	9	140069235	140083057	5	0	0.0441176		800	TMEM161A	19	19230424	19249310	5	2	0.0282761
									801	HADH	4	108910869	108956331	5	0	0.0336538		801	SSNA1	9	140083053	140084822	5	0	0.0441176		801	BORCS8	19	19287712	19303400	5	2	0.0282761
									802	OSTC	4	109571740	109588978	5	0	0.0336538		802	TPRN	9	140086068	140095163	5	0	0.0441176		802	RFXANK	19	19303007	19312678	5	2	0.0282761
									803	ZCCHC23	4	110224190	110237291	5	0	0.0336538		803	TMEM203	9	140098533	140100090	5	0	0.0441176		803	NR2C2AP	19	19312217	19314238	5	2	0.0282761
									804	SEC24B	4	110354870	110461615	5	0	0.0336538		804	NDOR1	9	140100118	140113813	5	0	0.0441176		804	NCAN	19	19322781	19363061	5	2	0.0282761
									805	MCUB	4	110481354	110608872	5	0	0.0336538		805	RNF208	9	140114698	140115775	5	0	0.0441176		805	HAPLN4	19	19366449	19373596	5	2	0.0282761
									806	RRH	4	110749149	110765863	5	0	0.0336538		806	CYSRT1	9	140119086	140120763	5	0	0.0441176		806	TM6SF2	19	19375173	19384074	5	2	0.0282761
									807	EGF	4	110834039	110934235	5	0	0.0336538		807	RNF224	9	140122017	140124090	5	0	0.0441176		807	MAU2	19	19431629	19469563	5	2	0.0282761
									808	ELOVL6	4	110970228	111119771	5	0	0.0336538		808	SLC34A3	9	140125208	140131006	5	0	0.0441176		808	TSSK6	19	19625027	19626469	5	2	0.0282761
									809	ENPEP	4	111397228	111484493	5	0	0.0336538		809	TUBB4B	9	140135710	140138159	5	0	0.0441176		809	NDUFA13	19	19627018	19639013	5	2	0.0282761
									810	PITX2	4	111538578	111544254	5	0	0.0336538		810	FAM166A	9	140138034	140142244	5	0	0.0441176		810	YJEFN3	19	19639669	19648393	5	2	0.0282761
									811	ZGRF1	4	113460488	113558151	5	0	0.0336538		811	STPG3	9	140145712	140147935	5	0	0.0441176		811	CILP2	19	19649073	19657468	5	2	0.0282761
									812	CAMK2D	4	114372187	114683083	5	0	0.0336538		812	NELFB	9	140149751	140168000	5	0	0.0441176		812	PBX4	19	19672515	19729725	5	2	0.0282761
									813	NDST4	4	115748928	116035032	5	0	0.0336538		813	TOR4A	9	140172279	140177093	5	0	0.0441176		813	LPAR2	19	19734463	19739039	5	2	0.0282761
									814	GAB1	4	144257982	144395718	5	0	0.0336538		814	NRARP	9	140194082	140196703	5	0	0.0441176		814	GMIP	19	19740281	19754476	5	2	0.0282761
									815	SMARCA5	4	144434615	144478642	5	0	0.0336538		815	NOXA1	9	140317846	140328858	5	0	0.0441176		815	KIF26B	1	245318286	245866428	3	0	0.0323077
									816	FREM3	4	144498559	144621828	5	0	0.0336538		816	ENTPD8	9	140328815	140335901	5	0	0.0441176		816	SMYD3	1	245912641	246580714	3	0	0.0323077
									817	HHIP	4	145567147	145659881	5	0	0.0336538		817	NSMF	9	140342021	140353786	5	0	0.0441176		817	ZNF496	1	247460714	247495242	3	0	0.0323077
									818	ANAPC10	4	145915726	146018534	5	0	0.0336538		818	MRPL41	9	140446308	140447007	5	0	0.0441176		818	OR14C36	1	248512076	248513015	3	0	0.0323077
									819	SMAD1	4	146402950	146480328	5	0	0.0336538		819	DPH7	9	140448895	140473078	5	0	0.0441176		819	ADSS	1	244571793	244615436	3	0	0.0323077
									820	SLC10A7	4	147175138	147443123	5	0	0.0336538		820	ZMYND19	9	140476530	140484937	5	0	0.0441176		820	CATSPERE	1	244624672	244803662	3	0	0.0323077
									821	LRBA	4	151185810	151936419	5	0	0.0336538		821	C11orf58	11	16760147	16779901	5	0	0.0441176		821	DESI2	1	244816349	244872336	3	0	0.0323077
									822	FAM160A1	4	152330397	152584784	5	0	0.0336538		822	OSBPL5	11	3108345	3186582	5	0	0.0441176		822	EFCAB2	1	245133170	245251148	3	0	0.0323077
									823	FBXW7	4	153242409	153456185	5	0	0.0336538		823	PDE3B	11	14665268	14893605	5	0	0.0441176		823	CNST	1	246729638	246811544	3	0	0.0323077
									824	ARFIP1	4	153701088	153833064	5	0	0.0336538		824	SERGEF	11	17809594	18034709	5	0	0.0441176		824	AHCTF1	1	247002399	247094726	3	0	0.0323077
									825	FHDC1	4	153864134	153900848	5	0	0.0336538		825	NAV2	11	19372270	20143147	5	0	0.0441176		825	ZNF670	1	247197939	247242115	3	0	0.0323077
									826	MND1	4	154265800	154336247	5	0	0.0336538		826	NELL1	11	20691096	21597232	5	0	0.0441176		826	ZNF124	1	247285276	247335319	3	0	0.0323077
									827	TMEM131L	4	154387497	154557863	5	0	0.0336538		827	PKP3	11	392598	404908	5	0	0.0441176		827	NLRP3	1	247579457	247612410	3	0	0.0323077
									828	RNF175	4	154631311	154681387	5	0	0.0336538		828	DEAF1	11	644219	695754	5	0	0.0441176		828	GCSAML	1	247670359	247740992	3	0	0.0323077
									829	RBM46	4	155702423	155749965	5	0	0.0336538		829	MUC5AC	11	1151579	1222364	5	0	0.0441176		829	OR2L13	1	248100330	248264224	3	0	0.0323077
									830	GUCY1A1	4	156587861	156643721	5	0	0.0336538		830	TOLLIP	11	1295597	1324020	5	0	0.0441176		830	ZBTB18	1	244212240	244220778	3	0	0.0323077
									831	ASIC5	4	156750880	156787425	5	0	0.0336538		831	BRSK2	11	1411128	1483919	5	0	0.0441176		831	C1orf100	1	244515936	244552390	3	0	0.0323077
									832	PDGFC	4	157682762	157892546	5	0	0.0336538		832	KCNQ1	11	2466220	2870340	5	0	0.0441176		832	COX20	1	244998607	245008365	3	0	0.0323077
									833	GLRB	4	157997276	158093242	5	0	0.0336538		833	ART1	11	3666360	3685646	5	0	0.0441176		833	HNRNPU	1	245013601	245027827	3	0	0.0323077
									834	GRIA2	4	158141735	158287227	5	0	0.0336538		834	NUP98	11	3696239	3819022	5	0	0.0441176		834	TFB2M	1	246703862	246729565	3	0	0.0323077
									835	RXFP1	4	159442865	159574524	5	0	0.0336538		835	INSC	11	15133969	15268754	5	0	0.0441176		835	SCCPDH	1	246887377	246931439	3	0	0.0323077
									836	FNIP2	4	159690146	159829202	5	0	0.0336538		836	SOX6	11	15987994	16424413	5	0	0.0441176		836	ZNF695	1	247108848	247171395	3	0	0.0323077
									837	C4orf45	4	159814683	159956333	5	0	0.0336538		837	PLEKHA7	11	16798843	17035963	5	0	0.0441176		837	ZNF669	1	247263263	247267674	3	0	0.0323077
									838	APELA	4	165798139	165818679	5	0	0.0336538		838	PIK3C2A	11	17108121	17229543	5	0	0.0441176		838	C1orf229	1	247273461	247275719	3	0	0.0323077
									839	KLHL2	4	166128769	166244308	5	0	0.0336538		839	NUCB2	11	17298264	17353412	5	0	0.0441176		839	VN1R5	1	247419373	247420447	3	0	0.0323077
									840	CPE	4	166300093	166419699	5	0	0.0336538		840	ABCC8	11	17414431	17498392	5	0	0.0441176		840	OR2B11	1	247614330	247615284	3	0	0.0323077
									841	TLL1	4	166794409	166952111	5	0	0.0336538		841	USH1C	11	17515441	17565963	5	0	0.0441176		841	OR2W5	1	247654369	247655711	3	0	0.0323077
									842	ANXA10	4	169013687	169108893	5	0	0.0336538		842	GTF2H1	11	18343815	18388590	5	0	0.0441176		842	OR2C3	1	247693433	247697141	3	0	0.0323077
									843	DDX60	4	169137441	169239958	5	0	0.0336538		843	LDHAL6A	11	18477373	18501147	5	0	0.0441176		843	OR2G2	1	247751661	247752615	3	0	0.0323077
									844	DDX60L	4	169277885	169401665	5	0	0.0336538		844	IGSF22	11	18725851	18747777	5	0	0.0441176		844	OR2G3	1	247768887	247769817	3	0	0.0323077
									845	PALLD	4	169418216	169849608	5	0	0.0336538		845	PRMT3	11	20409075	20530879	5	0	0.0441176		845	OR13G1	1	247835419	247836343	3	0	0.0323077
									846	SH3RF1	4	170015406	170192249	5	0	0.0336538		846	ANO5	11	22214721	22304913	5	0	0.0441176		846	OR6F1	1	247875130	247876057	3	0	0.0323077
									847	NEK1	4	170314420	170533778	5	0	0.0336538		847	GAS2	11	22688159	22834547	5	0	0.0441176		847	OR1C1	1	247920763	247921708	3	0	0.0323077
									848	HPF1	4	170650618	170679093	5	0	0.0336538		848	SCGB1C1	11	193079	194573	5	0	0.0441176		848	OR14A16	1	247978101	247979031	3	0	0.0323077
									849	GALNT7	4	174089903	174245118	5	0	0.0336538		849	ODF3	11	196760	200258	5	0	0.0441176		849	OR11L1	1	248004229	248005198	3	0	0.0323077
									850	SCRG1	4	174309298	174440389	5	0	0.0336538		850	BET1L	11	202923	207422	5	0	0.0441176		850	TRIM58	1	248020500	248043440	3	0	0.0323077
									851	CEP44	4	175205054	175254531	5	0	0.0336538		851	RIC8A	11	207510	215175	5	0	0.0441176		851	OR2W3	1	248058888	248059833	3	0	0.0323077
									852	GLRA3	4	175563161	175750466	5	0	0.0336538		852	SIRT3	11	215029	236362	5	0	0.0441176		852	OR2T8	1	248084319	248085258	3	0	0.0323077
									853	ADAM29	4	175839508	175899331	5	0	0.0336538		853	PSMD13	11	236807	252984	5	0	0.0441176		853	OR2L8	1	248112159	248113098	3	0	0.0323077
									854	GPM6A	4	176554087	176708827	5	0	0.0336538		854	NLRP6	11	278569	285388	5	0	0.0441176		854	OR2AK2	1	248128633	248129641	3	0	0.0323077
									855	WDR17	4	176986984	177103979	5	0	0.0336538		855	PGGHG	11	289137	295688	5	0	0.0441176		855	OR2L5	1	248185249	248186188	3	0	0.0323077
									856	WWC2	4	184020462	184241930	5	0	0.0336538		856	IFITM5	11	298199	299526	5	0	0.0441176		856	OR2L2	1	248201473	248202607	3	0	0.0323077
									857	STOX2	4	184826508	184944683	5	0	0.0336538		857	IFITM2	11	308106	309410	5	0	0.0441176		857	OR2L3	1	248223983	248224922	3	0	0.0323077
									858	ENPP6	4	185009858	185139114	5	0	0.0336538		858	IFITM1	11	313990	315272	5	0	0.0441176		858	OR2M5	1	248308449	248309388	3	0	0.0323077
									859	IRF2	4	185308875	185395726	5	0	0.0336538		859	IFITM3	11	319672	320914	5	0	0.0441176		859	OR2M2	1	248343287	248344331	3	0	0.0323077
									860	ACSL1	4	185676748	185729755	5	0	0.0336538		860	B4GALNT4	11	369794	382117	5	0	0.0441176		860	OR2M3	1	248366369	248367308	3	0	0.0323077
									861	CFAP97	4	186080815	186125182	5	0	0.0336538		861	SIGIRR	11	405715	414999	5	0	0.0441176		861	OR2M4	1	248402230	248403166	3	0	0.0323077
									862	SNX25	4	186125390	186285125	5	0	0.0336538		862	ANO9	11	417929	442011	5	0	0.0441176		862	OR2T33	1	248436153	248437116	3	0	0.0323077
									863	QDPR	4	17488015	17513857	5	0	0.0336538		863	PTDSS2	11	448267	491400	5	0	0.0441176		863	OR2T12	1	248457917	248458880	3	0	0.0323077
									864	CLRN2	4	17516787	17528727	5	0	0.0336538		864	RNH1	11	494511	506821	5	0	0.0441176		864	OR2M7	1	248486931	248487870	3	0	0.0323077
									865	LAP3	4	17578926	17609590	5	0	0.0336538		865	HRAS	11	532241	535567	5	0	0.0441176		865	OR2T4	1	248524882	248525929	3	0	0.0323077
									866	MED28	4	17616250	17627251	5	0	0.0336538		866	LRRC56	11	537521	554916	5	0	0.0441176		866	OR2T6	1	248550909	248551836	3	0	0.0323077
									867	DCAF16	4	17802277	17812381	5	0	0.0336538		867	LMNTD2	11	554849	560779	5	0	0.0441176		867	OR2T1	1	248569295	248570405	3	0	0.0323077
									868	DHX15	4	24529086	24586184	5	0	0.0336538		868	RASSF7	11	560970	564025	5	0	0.0441176		868	OR2T2	1	248616098	248617073	3	0	0.0323077
									869	SOD3	4	24797084	24802467	5	0	0.0336538		869	PHRF1	11	576445	612222	5	0	0.0441176		869	OR2T3	1	248636651	248637608	3	0	0.0323077
									870	LGI2	4	25000470	25032414	5	0	0.0336538		870	IRF7	11	612554	615728	5	0	0.0441176		870	OR2T5	1	248651889	248652837	3	0	0.0323077
									871	SEPSECS	4	25121626	25162204	5	0	0.0336538		871	CDHR5	11	616564	625067	5	0	0.0441176		871	OR2G6	1	248684947	248685898	3	0	0.0323077
									872	PI4K2B	4	25235652	25280831	5	0	0.0336538		872	SCT	11	626315	627240	5	0	0.0441176		872	OR2T29	1	248721844	248722792	3	0	0.0323077
									873	ZCCHC4	4	25314395	25354749	5	0	0.0336538		873	DRD4	11	637304	640706	5	0	0.0441176		873	OR2T34	1	248737101	248738058	3	0	0.0323077
									874	ANAPC4	4	25378847	25420120	5	0	0.0336538		874	TMEM80	11	695590	704129	5	0	0.0441176		874	OR2T10	1	248756130	248757069	3	0	0.0323077
									875	SLC34A2	4	25657434	25680370	5	0	0.0336538		875	EPS8L2	11	706119	727727	5	0	0.0441176		875	OR2T11	1	248789478	248790429	3	0	0.0323077
									876	SMIM20	4	25915813	25931501	5	0	0.0336538		876	TALDO1	11	747431	765024	5	0	0.0441176		876	OR2T35	1	248801587	248802559	3	0	0.0323077
									877	CCKAR	4	26483017	26492042	5	0	0.0336538		877	GATD1	11	767221	777502	5	0	0.0441176		877	OR2T27	1	248813231	248814185	3	0	0.0323077
									878	PGM2	4	37828281	37864559	5	0	0.0336538		878	CEND1	11	787109	790126	5	0	0.0441176		878	OR14I1	1	248844669	248845605	3	0	0.0323077
									879	PTTG2	4	37962055	37962631	5	0	0.0336538		879	SLC25A22	11	790474	796263	5	0	0.0441176		879	LYPD8	1	248902715	248903171	3	0	0.0323077
									880	TLR10	4	38773859	38784611	5	0	0.0336538		880	PANO1	11	797510	799185	5	0	0.0441176		880	SH3BP5L	1	249104644	249119565	3	0	0.0323077
									881	TLR1	4	38797875	38806412	5	0	0.0336538		881	PIDD1	11	799178	805250	5	0	0.0441176		881	ZNF672	1	249132376	249143716	3	0	0.0323077
									882	TLR6	4	38825324	38858438	5	0	0.0336538		882	RPLP2	11	809935	812876	5	0	0.0441176		882	ZNF692	1	249144202	249153125	3	0	0.0323077
									883	TMEM156	4	38968364	39034041	5	0	0.0336538		883	PNPLA2	11	818900	825573	5	0	0.0441176		883	PGBD2	1	249200441	249213345	3	0	0.0323077
									884	RPL9	4	39455743	39460568	5	0	0.0336538		884	CRACR2B	11	828259	831991	5	0	0.0441176		884	ASB18	2	237103514	237172988	3	0	0.0323077
									885	LIAS	4	39460643	39465434	5	0	0.0336538		885	CD151	11	832951	838835	5	0	0.0441176		885	GBX2	2	237073878	237076652	3	0	0.0323077
									886	PHOX2B	4	41746098	41750987	5	0	0.0336538		886	POLR2L	11	839720	842529	5	0	0.0441176		886	COPS8	2	237994083	238007489	3	0	0.0323077
									887	DCAF4L1	4	41983712	41988484	5	0	0.0336538		887	TSPAN4	11	842823	867116	5	0	0.0441176		887	LRRN1	3	3841114	3891518	3	0	0.0323077
									888	BEND4	4	42112869	42154895	5	0	0.0336538		888	CHID1	11	867858	910874	5	0	0.0441176		888	PXDC1	6	3722835	3752246	3	0	0.0323077
									889	SHISA3	4	42399855	42404504	5	0	0.0336538		889	AP2A2	11	925808	1012245	5	0	0.0441176		889	FAM50B	6	3849599	3851554	3	0	0.0323077
									890	YIPF7	4	44624353	44653658	5	0	0.0336538		890	MUC6	11	1012823	1036706	5	0	0.0441176		890	WIPI2	7	5229834	5273486	3	0	0.0323077
									891	GNPDA2	4	44703811	44728651	5	0	0.0336538		891	LOC101927503	11	1049777	1055764	5	0	0.0441176		891	CYTH3	7	6201409	6312242	3	0	0.0323077
									892	GABRG1	4	46037785	46126082	5	0	0.0336538		892	MUC2	11	1074874	1104416	5	0	0.0441176		892	THSD7A	7	11410061	11871824	3	0	0.0323077
									893	COMMD8	4	47452803	47465747	5	0	0.0336538		893	MUC5B	11	1244294	1283406	5	0	0.0441176		893	DGKB	7	14184673	14881075	3	0	0.0323077
									894	DCUN1D4	4	52709165	52783003	5	0	0.0336538		894	MOB2	11	1490677	1502116	5	0	0.0441176		894	HDAC9	7	18126564	19042039	3	0	0.0323077
									895	LRRC66	4	52859805	52886477	5	0	0.0336538		895	DUSP8	11	1575280	1593150	5	0	0.0441176		895	NFE2L3	7	26191846	26226757	3	0	0.0323077
									896	SGCB	4	52886860	52904485	5	0	0.0336538		896	KRTAP5-1	11	1605571	1606513	5	0	0.0441176		896	AUTS2	7	69063904	69755772	3	0	0.0323077
									897	PRDM8	4	81106423	81125483	5	0	0.0336538		897	KRTAP5-2	11	1618406	1619524	5	0	0.0441176		897	CALN1	7	71244475	71802208	3	0	0.0323077
									898	FGF5	4	81187741	81212171	5	0	0.0336538		898	KRTAP5-3	11	1628794	1629693	5	0	0.0441176		898	RADIL	7	4838739	4923335	3	0	0.0323077
[truncated: 921 more rows]
[truncated: 3 more columns]
