# Supplementary material for: Genomic landscapes of ovarian clear cell carcinoma from latin countries reveal aberrations linked to survival and progression
Source: BMC Cancer. 2023 Jul 3;23:613. doi: 10.1186/s12885-023-11095-8 (PMC10316635; doi:10.1186/s12885-023-11095-8)
Supplement: Supplementary file 8 — Supplementary Material 7 [file 12885_2023_11095_MOESM7_ESM.xlsx]

## Sheet: regions Progression groups gain
Order	Chr_Start	Chromosome	Start	End	recurrence (n=4)	no recurrence (n=8)	Pvalue	Genes
1	C1_St144945942	1	144945942	145205788	3	0	0.013986	PDE4DIP
2	C1_St205225458	1	205225458	205629815	4	1	0.00699301	LEMD1 TMCC2 NUAK2 KLHDC8A CDK18 MFSD4A ELK4 SLC45A3
3	C1_St205631768	1	205631768	206301865	4	1.96876	0.020542	SLC45A3 NUCKS1 RAB29 SLC41A1 PM20D1 SLC26A9 FAM72A AVPR1B RHEX
4	C1_St228430373	1	228430373	228435029	3	0	0.013986	OBSCN
5	C1_St232174174	1	232174174	232181815	3	0	0.013986
6	C2_St28019368	2	28019368	28411155	4	1	0.00699301	BABAM2 RBKS
7	C2_St28474424	2	28474424	28674572	3	0	0.013986	BABAM2 FOSL2
8	C2_St30049011	2	30049011	31085727	3	0	0.013986	ALK LCLAT1 YPEL5 LBH CAPN13
9	C2_St31112403	2	31112403	31251499	3	0	0.013986	GALNT14
10	C2_St37590285	2	37590285	38272672	3	0	0.013986	CDC42EP3 RMDN2 QPCT
11	C2_St38274909	2	38274909	38524487	3	0	0.013986	RMDN2 ATL2 CYP1B1
12	C2_St79251848	2	79251848	83135914	3	0	0.013986	CTNNA2 REG3G REG1B REG1A REG3A LRRTM1
13	C2_St117723259	2	117723259	118009952	3	0	0.013986
14	C3_St63411	3	63411	4502165	3	0	0.013986	IL5RA CHL1 CNTN6 CNTN4 SUMF1 TRNT1 CRBN LRRN1 SETMAR
15	C3_St5044312	3	5044312	9162915	3	0	0.013986	EDEM1 GRM7 CAV3 SRGAP3 ARL8B LMCD1 SSUH2 OXTR RAD18
16	C3_St9166852	3	9166852	9566756	3	0	0.013986	SRGAP3 LHFPL4 THUMPD3 SETD5
17	C3_St9579007	3	9579007	12880818	3	0	0.013986	ATP2B2 ATG7 MKRN2OS LHFPL4 MTMR14 TADA3 IL17RC FANCD2 IRAK2 SEC13 SLC6A11 HRH1 VGLL4 SYN2 PPARG CAND2 CPNE9 BRPF1 OGG1 CAMK1 ARPC4 ARPC4-TTLL3 TTLL3 RPUSD3 CIDEC JAGN1 IL17RE CRELD1 PRRT3 EMC3 FANCD2OS BRK1 VHL TATDN2 GHRL SLC6A1 TAMM41 TIMP4 TSEN2 MKRN2 RAF1 TMEM40 RPL32
18	C3_St12895197	3	12895197	13288579	3	0	0.013986	IQSEC1
19	C3_St51392647	3	51392647	51650510	3	0	0.013986	DOCK3 DCAF1 RAD54L2 MANF RBM15B
20	C10_St48482487	10	48482487	51552274	3.04183	0	0.0134594	TIMM23B PTPN20 FRMPD2 MAPK8 ARHGAP22 WDFY4 DRGX ERCC6 PGBD3 CHAT PARG FAM25C LRRC18 VSTM4 FAM170B TMEM273 C10orf71 SLC18A3 C10orf53 OGDHL MSMB
21	C10_St51553874	10	51553874	52019352	3	0	0.013986	TIMM23B MSMB NCOA4 TIMM23 AGAP6 WASHC2A ASAH2
22	C10_St52037460	10	52037460	58182621	3	0	0.013986	PRKG1 MBL2 PCDH15 SGMS1 A1CF ASAH2B CSTF2T DKK1 MTRNR2L5 ZWINT
23	C10_St58511092	10	58511092	59739454	3	0	0.013986
24	C10_St59763426	10	59763426	59881138	3	0	0.013986
25	C10_St60259623	10	60259623	60686269	3	0	0.013986	BICC1
26	C10_St60702923	10	60702923	63416969	3	0	0.013986	ANK3 PHYHIPL FAM13C CCDC6 RHOBTB1 TMEM26 SLC16A9 MRLN CDK1
27	C10_St63426075	10	63426075	63897452	3	0	0.013986	CABCOCO1 ARID5B
28	C10_St69440084	10	69440084	69982298	3	0	0.013986	CTNNA3 HERC4 DNAJC12 SIRT1 MYPN
29	C22_St16054713	22	16054713	17285949	3	0	0.013986	XKR3 POTEH OR11H1 CCT8L2
30	C22_St18292634	22	18292634	18876426	3	0	0.013986	MICAL3 TUBA8 PEX26 USP18
31	C22_St29130013	22	29130013	29138715	3	0	0.013986	CHEK2 HSCB
32	C22_St40799255	22	40799255	41272143	3.90253	0.250088	0.00402461	MKL1 XPNPEP3 SGSM3 MCHR1 SLC25A17 ST13 DNAJB7
33	C22_St45479162	22	45479162	45498187	3	0	0.013986
34	C22_St46527956	22	46527956	46553234	3	0	0.013986	PPARA
35	C22_St46804155	22	46804155	46807200	3	0	0.013986	CELSR1
36	C22_St46953534	22	46953534	46966536	3	0	0.013986

## Sheet: regions Progression groups loss
Order	Chr_Start	Chromosome	Start	End	recurrence (n=8)	no recurrence (n=4)	Pvalue	Genes
1	C7_St66423509	7	66423509	66425626	3	0	0.013986	TMEM248

## Sheet: genes Progression groups gain
Order	Genes	Chromosome	Start	End	recurrence (n=4)	no recurrence (n=8)	Pvalue
1	MAPK8	10	49514681	49647403	4	0	0.0013986
2	MKL1	22	40806284	40929884	4	0	0.0013986
3	MCHR1	22	41075181	41078818	4	0	0.0013986
4	LEMD1	1	205350505	205391214	4	1	0.00699301
5	TMCC2	1	205197037	205242471	4	1	0.00699301
6	NUAK2	1	205271190	205290919	4	1	0.00699301
7	KLHDC8A	1	205305192	205326128	4	1	0.00699301
8	CDK18	1	205473683	205501921	4	1	0.00699301
9	MFSD4A	1	205538111	205572046	4	1	0.00699301
10	ELK4	1	205577070	205602000	4	1	0.00699301
11	SLC45A3	1	205626980	205649630	4	1	0.00699301
12	BABAM2	2	28111575	28561768	4	1	0.00699301
13	RBKS	2	28004230	28113263	4	1	0.00699301
14	XPNPEP3	22	41253084	41328823	4	1	0.00699301
15	SLC25A17	22	41165633	41215403	4	1	0.00699301
16	ST13	22	41220538	41253012	4	1	0.00699301
17	DNAJB7	22	41255552	41258130	4	1	0.00699301
18	CTNNA2	2	79740059	80875993	3	0	0.013986
19	ALK	2	29415639	30144477	3	0	0.013986
20	LCLAT1	2	30670091	30867091	3	0	0.013986
21	GALNT14	2	31133330	31352506	3	0	0.013986
22	CDC42EP3	2	37869024	37899342	3	0	0.013986
23	RMDN2	2	38152461	38294280	3	0	0.013986
24	ATL2	2	38521098	38603672	3	0	0.013986
25	FOSL2	2	28615778	28637516	3	0	0.013986
26	YPEL5	2	30369749	30383399	3	0	0.013986
27	LBH	2	30454396	30482899	3	0	0.013986
28	CAPN13	2	30945636	31030311	3	0	0.013986
29	QPCT	2	37571752	37600465	3	0	0.013986
30	CYP1B1	2	38294745	38303323	3	0	0.013986
31	REG3G	2	79252811	79255630	3	0	0.013986
32	REG1B	2	79312148	79315150	3	0	0.013986
33	REG1A	2	79347583	79350545	3	0	0.013986
34	REG3A	2	79384131	79386879	3	0	0.013986
35	LRRTM1	2	80529002	80531487	3	0	0.013986
36	IL5RA	3	3108007	3152058	3	0	0.013986
37	EDEM1	3	5229358	5261650	3	0	0.013986
38	GRM7	3	6902801	7783218	3	0	0.013986
39	ATP2B2	3	10365706	10547268	3	0	0.013986
40	ATG7	3	11314009	11599139	3	0	0.013986
41	MKRN2OS	3	12581279	12586963	3	0	0.013986
42	DOCK3	3	50712671	51421629	3	0	0.013986
43	CHL1	3	238278	451100	3	0	0.013986
44	CNTN6	3	1134341	1445294	3	0	0.013986
45	CNTN4	3	2140549	3099645	3	0	0.013986
46	CAV3	3	8775485	8788451	3	0	0.013986
47	SRGAP3	3	9022274	9291369	3	0	0.013986
48	LHFPL4	3	9540044	9595486	3	0	0.013986
49	MTMR14	3	9691116	9744078	3	0	0.013986
50	TADA3	3	9821647	9834695	3	0	0.013986
51	IL17RC	3	9958757	9975305	3	0	0.013986
52	FANCD2	3	10068070	10141344	3	0	0.013986
53	IRAK2	3	10206562	10285427	3	0	0.013986
54	SEC13	3	10342612	10362725	3	0	0.013986
55	SLC6A11	3	10857884	10982419	3	0	0.013986
56	HRH1	3	11178778	11304939	3	0	0.013986
57	VGLL4	3	11597540	11685451	3	0	0.013986
58	SYN2	3	12045833	12227232	3	0	0.013986
59	PPARG	3	12329348	12475855	3	0	0.013986
60	CAND2	3	12838170	12876313	3	0	0.013986
61	IQSEC1	3	12938541	13009198	3	0	0.013986
62	DCAF1	3	51433297	51534018	3	0	0.013986
63	RAD54L2	3	51572698	51702676	3	0	0.013986
64	TRNT1	3	3168599	3190707	3	0	0.013986
65	CRBN	3	3191316	3221401	3	0	0.013986
66	LRRN1	3	3841114	3891518	3	0	0.013986
67	SETMAR	3	4344987	4356086	3	0	0.013986
68	ARL8B	3	5163929	5222601	3	0	0.013986
69	LMCD1	3	8543492	8592960	3	0	0.013986
70	SSUH2	3	8661085	8686484	3	0	0.013986
71	OXTR	3	8792093	8811300	3	0	0.013986
72	RAD18	3	8918879	9005159	3	0	0.013986
73	THUMPD3	3	9404716	9428475	3	0	0.013986
74	SETD5	3	9439383	9519838	3	0	0.013986
75	CPNE9	3	9745490	9769134	3	0	0.013986
76	BRPF1	3	9773412	9789699	3	0	0.013986
77	OGG1	3	9791627	9799091	3	0	0.013986
78	CAMK1	3	9799028	9811668	3	0	0.013986
79	ARPC4	3	9834178	9848789	3	0	0.013986
80	ARPC4-TTLL3	3	9834231	9878040	3	0	0.013986
81	TTLL3	3	9851643	9878040	3	0	0.013986
82	RPUSD3	3	9879532	9885702	3	0	0.013986
83	CIDEC	3	9908393	9920496	3	0	0.013986
84	JAGN1	3	9932270	9936033	3	0	0.013986
85	IL17RE	3	9944295	9958086	3	0	0.013986
86	CRELD1	3	9975523	9987097	3	0	0.013986
87	PRRT3	3	9987225	9994099	3	0	0.013986
88	EMC3	3	10004363	10052932	3	0	0.013986
89	FANCD2OS	3	10123003	10149915	3	0	0.013986
90	BRK1	3	10157332	10168874	3	0	0.013986
91	VHL	3	10183318	10195354	3	0	0.013986
92	TATDN2	3	10290176	10322906	3	0	0.013986
93	GHRL	3	10327433	10334631	3	0	0.013986
94	SLC6A1	3	11034419	11080935	3	0	0.013986
95	TAMM41	3	11831915	11888393	3	0	0.013986
96	TIMP4	3	12194567	12200851	3	0	0.013986
97	TSEN2	3	12525930	12574820	3	0	0.013986
98	MKRN2	3	12598512	12625212	3	0	0.013986
99	RAF1	3	12625099	12705700	3	0	0.013986
100	TMEM40	3	12775028	12800808	3	0	0.013986
101	RPL32	3	12876443	12881949	3	0	0.013986
102	MANF	3	51422667	51426828	3	0	0.013986
103	RBM15B	3	51428698	51435339	3	0	0.013986
104	TIMM23B	10	51371378	51734610	3	0	0.013986
105	PRKG1	10	52750910	54058110	3	0	0.013986
106	MBL2	10	54525139	54531460	3	0	0.013986
107	PCDH15	10	55562530	56561051	3	0	0.013986
108	ANK3	10	61786055	61900774	3	0	0.013986
109	CTNNA3	10	67672275	69455949	3	0	0.013986
110	PTPN20	10	48737041	48827640	3	0	0.013986
111	FRMPD2	10	49364601	49459800	3	0	0.013986
112	ARHGAP22	10	49654067	49701692	3	0	0.013986
113	WDFY4	10	49893517	50191001	3	0	0.013986
114	DRGX	10	50574160	50604062	3	0	0.013986
115	ERCC6	10	50662525	50747169	3	0	0.013986
116	PGBD3	10	50723150	50732327	3	0	0.013986
117	CHAT	10	50817140	50873150	3	0	0.013986
118	PARG	10	51026320	51371371	3	0	0.013986
119	SGMS1	10	52065344	52383737	3	0	0.013986
120	A1CF	10	52559168	52645435	3	0	0.013986
121	BICC1	10	60272903	60591197	3	0	0.013986
122	PHYHIPL	10	60936347	61007534	3	0	0.013986
123	FAM13C	10	61005888	61122352	3	0	0.013986
124	CCDC6	10	61548504	61666414	3	0	0.013986
125	RHOBTB1	10	62629195	62704033	3	0	0.013986
126	TMEM26	10	63166399	63213208	3	0	0.013986
127	CABCOCO1	10	63422718	63526091	3	0	0.013986
128	ARID5B	10	63661012	63856707	3	0	0.013986
129	HERC4	10	69681655	69835103	3	0	0.013986
130	FAM25C	10	49203354	49207825	3	0	0.013986
131	LRRC18	10	50117527	50122280	3	0	0.013986
132	VSTM4	10	50222289	50323577	3	0	0.013986
133	FAM170B	10	50339198	50342065	3	0	0.013986
134	TMEM273	10	50362768	50396445	3	0	0.013986
135	C10orf71	10	50507186	50535537	3	0	0.013986
136	SLC18A3	10	50818346	50820766	3	0	0.013986
137	C10orf53	10	50887683	50902948	3	0	0.013986
138	OGDHL	10	50942686	50970045	3	0	0.013986
139	MSMB	10	51549552	51562517	3	0	0.013986
140	NCOA4	10	51565107	51590734	3	0	0.013986
141	TIMM23	10	51592079	51623386	3	0	0.013986
142	AGAP6	10	51748077	51770259	3	0	0.013986
143	WASHC2A	10	51827647	51893269	3	0	0.013986
144	ASAH2	10	51946999	52008370	3	0	0.013986
145	ASAH2B	10	52499447	52516948	3	0	0.013986
146	CSTF2T	10	53455245	53459355	3	0	0.013986
147	DKK1	10	54074040	54077417	3	0	0.013986
148	MTRNR2L5	10	57358749	57360488	3	0	0.013986
149	ZWINT	10	58117198	58121034	3	0	0.013986
150	SLC16A9	10	61410521	61469649	3	0	0.013986
151	MRLN	10	61496747	61513203	3	0	0.013986
152	CDK1	10	62538088	62546827	3	0	0.013986
153	DNAJC12	10	69556426	69597937	3	0	0.013986
154	SIRT1	10	69644426	69678147	3	0	0.013986
155	MYPN	10	69865873	69971774	3	0	0.013986
156	XKR3	22	17264301	17302589	3	0	0.013986
157	MICAL3	22	18270414	18507325	3	0	0.013986
158	TUBA8	22	18593452	18614498	3	0	0.013986
159	CHEK2	22	29083730	29137822	3	0	0.013986
160	POTEH	22	16256331	16287937	3	0	0.013986
161	OR11H1	22	16448823	16449804	3	0	0.013986
162	CCT8L2	22	17071647	17073700	3	0	0.013986
163	PEX26	22	18560685	18573797	3	0	0.013986
164	USP18	22	18632757	18660164	3	0	0.013986
165	SGSM3	22	40766565	40806293	3	0	0.013986
166	NUCKS1	1	205681946	205719372	4	2	0.020979
167	RAB29	1	205737113	205744610	4	2	0.020979
168	SLC41A1	1	205758220	205782324	4	2	0.020979
169	PM20D1	1	205797149	205819276	4	2	0.020979
170	SLC26A9	1	205882175	205912588	4	2	0.020979
171	FAM72A	1	206137264	206155151	4	2	0.020979
172	AVPR1B	1	206224282	206231482	4	2	0.020979
173	RHEX	1	206238871	206288647	4	2	0.020979
